# Supplementary material for: A Comprehensive Study of De Novo Mutations on the Protein-Protein Interaction Interfaces Provides New Insights into Developmental Delay
Source: Biomolecules. 2022 Nov 6;12(11):1643. doi: 10.3390/biom12111643 (PMC9687726; doi:10.3390/biom12111643)
Supplement: Supplementary file 1 [file biomolecules-12-01643-s001.zip › Supplemental Table S1í¬í¬All de novo Missense mutations in the study.xlsx]

## Sheet: Developmental Delay dnMIs
EntrezID	cytoBand	Chr	Start	End	Ref	Alt	Variant	Gene.refGene	Func.refGene	ExonicFunc.refGene	SampleID	StudyName	PubmedID	NumProbands	NumControls	SequenceType	PrimaryPhenotype	DisorderCategory	Validation	sex	source	GeneDetail.refGene	AAChange.refGene	1000G_ALL	1000G_AFR	1000G_AMR	1000G_EAS	1000G_EUR	1000G_SAS	ExAC_Freq	ExAC_AFR	ExAC_AMR	ExAC_EAS	ExAC_FIN	ExAC_NFE	ExAC_OTH	ExAC_SAS	ESP6500si_ALL	ESP6500si_AA	ESP6500si_EA	CG46	NCI60	dbSNP	COSMIC_ID	COSMIC_DIS	ClinVar_SIG	ClinVar_DIS	ClinVar_ID	ClinVar_DB
81669	1p36.33	1	1326157	1326157	G	A	G>A	CCNL2	exonic	nonsynonymous SNV	DDD4K.03877	DDD_2017	28135719	4293	0	exome	Developmental Delay (DD)	psychiatric disorder	validated	.	non-ssc	.	CCNL2:NM_001350497:exon5:c.C82T:p.R28W,CCNL2:NM_030937:exon6:c.C748T:p.R250W,CCNL2:NM_001320153:exon7:c.C82T:p.R28W,CCNL2:NM_001320155:exon7:c.C82T:p.R28W,CCNL2:NM_001350498:exon7:c.C82T:p.R28W,CCNL2:NM_001350499:exon8:c.C355T:p.R119W,CCNL2:NM_001350500:exon8:c.C355T:p.R119W	.	.	.	.	.	.	8.24e-06	0	8.64e-05	0	0	0	0	0	.	.	.	.	.	rs752266749	.	.	.	.	.	.
9651	1p36.32	1	2410013	2410013	C	T	C>T	PLCH2	exonic	nonsynonymous SNV	DDD4K.02750	DDD_2017	28135719	4293	0	exome	Developmental Delay (DD)	psychiatric disorder	validated	.	non-ssc	.	PLCH2:NM_001303012:exon2:c.C142T:p.R48C,PLCH2:NM_001303013:exon2:c.C283T:p.R95C,PLCH2:NM_014638:exon2:c.C223T:p.R75C	.	.	.	.	.	.	4.7e-05	0	0	0	0	6.73e-05	0	6.71e-05	.	.	.	.	.	rs371650535	COSM2049760	1(large_intestine)	.	.	.	.
8764	1p36.32	1	2489818	2489818	G	A	G>A	TNFRSF14	exonic	nonsynonymous SNV	DDD4K.02126	DDD_2017	28135719	4293	0	exome	Developmental Delay (DD)	psychiatric disorder	validated	.	non-ssc	.	TNFRSF14:NM_001297605:exon3:c.G215A:p.G72D,TNFRSF14:NM_003820:exon3:c.G215A:p.G72D	.	.	.	.	.	.	.	.	.	.	.	.	.	.	.	.	.	.	.	.	COSM5656333	1(haematopoietic_and_lymphoid_tissue)	.	.	.	.
23261	1p36.23	1	7797375	7797375	C	T	C>T	CAMTA1	exonic	nonsynonymous SNV	DDD4K.03837	DDD_2017	28135719	4293	0	exome	Developmental Delay (DD)	psychiatric disorder	validated	.	non-ssc	.	CAMTA1:NM_001349613:exon5:c.C532T:p.R178W,CAMTA1:NM_001349615:exon5:c.C475T:p.R159W,CAMTA1:NM_001349616:exon5:c.C475T:p.R159W,CAMTA1:NM_001349618:exon5:c.C475T:p.R159W,CAMTA1:NM_001349619:exon5:c.C475T:p.R159W,CAMTA1:NM_001349622:exon5:c.C475T:p.R159W,CAMTA1:NM_001349624:exon5:c.C475T:p.R159W,CAMTA1:NM_001349626:exon5:c.C475T:p.R159W,CAMTA1:NM_001349614:exon7:c.C475T:p.R159W,CAMTA1:NM_001349617:e…	.	.	.	.	.	.	.	.	.	.	.	.	.	.	.	.	.	.	.	.	COSM4009944	2(stomach)	.	.	.	.
9563	1p36.22	1	9324150	9324150	G	T	G>T	H6PD	exonic	nonsynonymous SNV	DDD4K.03271	DDD_2017	28135719	4293	0	exome	Developmental Delay (DD)	psychiatric disorder	validated	.	non-ssc	.	H6PD:NM_001282587:exon5:c.G1631T:p.G544V,H6PD:NM_004285:exon5:c.G1598T:p.G533V	.	.	.	.	.	.	.	.	.	.	.	.	.	.	.	.	.	.	.	.	.	.	.	.	.	.
80176	1p36.22	1	9416263	9416263	G	A	G>A	SPSB1	exonic	nonsynonymous SNV	DDD4K.00124	DDD_2017	28135719	4293	0	exome	Developmental Delay (DD)	psychiatric disorder	validated	.	non-ssc	.	SPSB1:NM_025106:exon2:c.G313A:p.A105T	.	.	.	.	.	.	.	.	.	.	.	.	.	.	.	.	.	.	.	.	.	.	.	.	.	.
10277	1p36.22	1	10132189	10132189	C	T	C>T	UBE4B	exonic	nonsynonymous SNV	DDD4K.02458	DDD_2017	28135719	4293	0	exome	Developmental Delay (DD)	psychiatric disorder	validated	.	non-ssc	.	UBE4B:NM_001105562:exon2:c.C128T:p.A43V,UBE4B:NM_006048:exon2:c.C128T:p.A43V	.	.	.	.	.	.	.	.	.	.	.	.	.	.	.	.	.	.	.	.	COSM1195783;COSM1195782	1(lung)	.	.	.	.
2475	1p36.22	1	11217303	11217303	C	T	C>T	MTOR	exonic	nonsynonymous SNV	DDD4K.00055	DDD_2017	28135719	4293	0	exome	Developmental Delay (DD)	psychiatric disorder	validated	.	non-ssc	.	MTOR:NM_004958:exon30:c.G4375A:p.A1459T	.	.	.	.	.	.	.	.	.	.	.	.	.	.	.	.	.	.	.	.	.	.	.	.	.	.
1185	1p36.22	1	11900219	11900219	G	A	G>A	CLCN6	exonic	nonsynonymous SNV	DDD4K.02212	DDD_2017	28135719	4293	0	exome	Developmental Delay (DD)	psychiatric disorder	validated	.	non-ssc	.	CLCN6:NM_001256959:exon22:c.G2483A:p.R828Q,CLCN6:NM_001286:exon23:c.G2549A:p.R850Q	.	.	.	.	.	.	.	.	.	.	.	.	.	.	.	.	.	.	.	.	.	.	.	.	.	.
57822	1p36.11	1	24690826	24690826	G	A	G>A	GRHL3	exonic	nonsynonymous SNV	DDD4K.01706	DDD_2017	28135719	4293	0	exome	Developmental Delay (DD)	psychiatric disorder	validated	.	non-ssc	.	GRHL3:NM_198174:exon16:c.G1846A:p.V616I	.	.	.	.	.	.	.	.	.	.	.	.	.	.	.	.	.	.	.	.	.	.	.	.	.	.
10250	1p36.11	1	24981353	24981353	C	T	C>T	SRRM1	exonic	nonsynonymous SNV	DDD4K.02028	DDD_2017	28135719	4293	0	exome	Developmental Delay (DD)	psychiatric disorder	validated	.	non-ssc	.	SRRM1:NM_001303448:exon9:c.C1048T:p.R350C,SRRM1:NM_001303449:exon9:c.C931T:p.R311C,SRRM1:NM_005839:exon9:c.C1048T:p.R350C	.	.	.	.	.	.	.	.	.	.	.	.	.	.	.	.	.	.	.	.	COSM5088643;COSM1341225	2(large_intestine)	.	.	.	.
64793	1p36.11	1	26581950	26581950	C	T	C>T	CEP85	exonic	nonsynonymous SNV	DDD4K.00002	DDD_2017	28135719	4293	0	exome	Developmental Delay (DD)	psychiatric disorder	validated	.	non-ssc	.	CEP85:NM_001281517:exon3:c.C344T:p.P115L,CEP85:NM_001319944:exon4:c.C497T:p.P166L,CEP85:NM_022778:exon4:c.C497T:p.P166L	.	.	.	.	.	.	2.47e-05	0	0.0003	0	0	0	0	0	.	.	.	.	.	rs761634960	.	.	.	.	.	.
8289	1p36.11	1	27094442	27094442	C	A	C>A	ARID1A	exonic	nonsynonymous SNV	DDD4K.04249	DDD_2017	28135719	4293	0	exome	Developmental Delay (DD)	psychiatric disorder	validated	.	non-ssc	.	ARID1A:NM_006015:exon11:c.C3150A:p.D1050E,ARID1A:NM_139135:exon11:c.C3150A:p.D1050E	.	.	.	.	.	.	.	.	.	.	.	.	.	.	.	.	.	.	.	.	.	.	.	.	.	.
4146	1p35.2	1	31194346	31194346	G	C	G>C	MATN1	exonic	nonsynonymous SNV	DDD4K.03810	DDD_2017	28135719	4293	0	exome	Developmental Delay (DD)	psychiatric disorder	validated	.	non-ssc	.	MATN1:NM_002379:exon2:c.C347G:p.T116R	.	.	.	.	.	.	.	.	.	.	.	.	.	.	.	.	.	.	.	.	.	.	.	.	.	.
5928	1p35.1	1	33138422	33138422	T	C	T>C	RBBP4	exonic	nonsynonymous SNV	DDD4K.01255	DDD_2017	28135719	4293	0	exome	Developmental Delay (DD)	psychiatric disorder	validated	.	non-ssc	.	RBBP4:NM_001135255:exon11:c.T1129C:p.S377P,RBBP4:NM_001135256:exon11:c.T1027C:p.S343P,RBBP4:NM_005610:exon11:c.T1132C:p.S378P	.	.	.	.	.	.	.	.	.	.	.	.	.	.	.	.	.	.	.	.	.	.	.	.	.	.
113451	1p35.1	1	33583552	33583552	C	T	C>T	AZIN2	exonic	nonsynonymous SNV	DDD4K.03483	DDD_2017	28135719	4293	0	exome	Developmental Delay (DD)	psychiatric disorder	validated	.	non-ssc	.	AZIN2:NM_001301824:exon7:c.C794T:p.A265V,AZIN2:NM_001301823:exon8:c.C794T:p.A265V,AZIN2:NM_001301825:exon8:c.C1139T:p.A380V,AZIN2:NM_001350402:exon9:c.C626T:p.A209V,AZIN2:NM_001293562:exon10:c.C1079T:p.A360V,AZIN2:NM_001350399:exon10:c.C794T:p.A265V,AZIN2:NM_001350398:exon11:c.C794T:p.A265V,AZIN2:NM_001350400:exon11:c.C794T:p.A265V,AZIN2:NM_001350401:exon11:c.C794T:p.A265V,AZIN2:NM_052998:exon11:…	.	.	.	.	.	.	3.33e-05	0	0	0.0001	0	4.53e-05	0	0	0.0001	.	0.0001	.	.	rs369229306	COSM1181987	1(large_intestine)	.	.	.	.
149076	1p35.1	1	33745934	33745934	C	A	C>A	ZNF362	exonic	nonsynonymous SNV	DDD4K.00936	DDD_2017	28135719	4293	0	exome	Developmental Delay (DD)	psychiatric disorder	validated	.	non-ssc	.	ZNF362:NM_152493:exon5:c.C559A:p.P187T	.	.	.	.	.	.	1.68e-05	9.98e-05	0	0	0	1.53e-05	0	0	0.0001	0.0002	.	.	.	rs369076583	.	.	.	.	.	.
9202	1p34.3	1	35873696	35873696	G	A	G>A	ZMYM4	exonic	nonsynonymous SNV	DDD4K.02405	DDD_2017	28135719	4293	0	exome	Developmental Delay (DD)	psychiatric disorder	validated	.	non-ssc	.	ZMYM4:NM_001350140:exon24:c.G2912A:p.R971Q,ZMYM4:NM_005095:exon26:c.G3884A:p.R1295Q,ZMYM4:NM_001350138:exon27:c.G3788A:p.R1263Q,ZMYM4:NM_001350139:exon27:c.G2912A:p.R971Q	.	.	.	.	.	.	.	.	.	.	.	.	.	.	.	.	.	.	.	.	.	.	.	.	.	.
26523	1p34.3	1	36359409	36359409	A	T	A>T	AGO1	exonic	nonsynonymous SNV	DDD4K.02796	DDD_2017	28135719	4293	0	exome	Developmental Delay (DD)	psychiatric disorder	validated	.	non-ssc	.	AGO1:NM_001317123:exon5:c.A422T:p.D141V,AGO1:NM_012199:exon5:c.A647T:p.D216V	.	.	.	.	.	.	.	.	.	.	.	.	.	.	.	.	.	.	.	.	.	.	.	.	.	.
10946	1p34.3	1	38433755	38433755	G	A	G>A	SF3A3	exonic	nonsynonymous SNV	DDD4K.03961	DDD_2017	28135719	4293	0	exome	Developmental Delay (DD)	psychiatric disorder	validated	.	non-ssc	.	SF3A3:NM_001320830:exon13:c.C1174T:p.H392Y,SF3A3:NM_006802:exon15:c.C1333T:p.H445Y	.	.	.	.	.	.	.	.	.	.	.	.	.	.	.	.	.	.	.	.	.	.	.	.	.	.
339559	1p34.2	1	40961469	40961469	A	G	A>G	ZFP69	exonic	nonsynonymous SNV	DDD4K.00034	DDD_2017	28135719	4293	0	exome	Developmental Delay (DD)	psychiatric disorder	validated	.	non-ssc	.	ZFP69:NM_001320178:exon6:c.A1322G:p.K441R,ZFP69:NM_001320179:exon6:c.A1319G:p.K440R,ZFP69:NM_198494:exon6:c.A1319G:p.K440R	.	.	.	.	.	.	.	.	.	.	.	.	.	.	.	.	.	.	.	.	.	.	.	.	.	.
59269	1p34.2	1	42049502	42049502	G	A	G>A	HIVEP3	exonic	nonsynonymous SNV	DDD4K.00482	DDD_2017	28135719	4293	0	exome	Developmental Delay (DD)	psychiatric disorder	validated	.	non-ssc	.	HIVEP3:NM_001127714:exon3:c.C967T:p.R323C,HIVEP3:NM_024503:exon4:c.C967T:p.R323C	.	.	.	.	.	.	1.73e-05	0	0	0	0	3.06e-05	0	0	.	.	.	.	.	rs762843724	.	.	.	.	.	.
149465	1p34.2	1	43647483	43647483	A	G	A>G	CFAP57	exonic	nonsynonymous SNV	DDD4K.00018	DDD_2017	28135719	4293	0	exome	Developmental Delay (DD)	psychiatric disorder	validated	.	non-ssc	.	CFAP57:NM_001167965:exon3:c.A436G:p.I146V,CFAP57:NM_001195831:exon3:c.A436G:p.I146V,CFAP57:NM_152498:exon3:c.A436G:p.I146V	0.001	0.0038	.	.	.	.	0.0001	0.0009	0.0002	0	0	9.01e-05	0	6.06e-05	0.0005	0.0009	0.0002	.	.	rs146670673	.	.	.	.	.	.
23334	1p34.2	1	43870061	43870061	C	T	C>T	SZT2	exonic	nonsynonymous SNV	DDD4K.01213	DDD_2017	28135719	4293	0	exome	Developmental Delay (DD)	psychiatric disorder	validated	.	non-ssc	.	SZT2:NM_015284:exon4:c.C338T:p.T113I	.	.	.	.	.	.	1.68e-05	0	0.0002	0	0	0	0	0	.	.	.	.	.	rs779563217	.	.	.	.	.	.
3652	1p34.1	1	46193443	46193443	C	T	C>T	IPP	exonic	nonsynonymous SNV	DDD4K.03257	DDD_2017	28135719	4293	0	exome	Developmental Delay (DD)	psychiatric disorder	validated	.	non-ssc	.	IPP:NM_001145349:exon5:c.G908A:p.R303H,IPP:NM_005897:exon5:c.G908A:p.R303H	.	.	.	.	.	.	.	.	.	.	.	.	.	.	.	.	.	.	.	.	.	.	.	.	.	.
23139	1p34.1	1	46495845	46495845	G	A	G>A	MAST2	exonic	nonsynonymous SNV	DDD4K.01751	DDD_2017	28135719	4293	0	exome	Developmental Delay (DD)	psychiatric disorder	validated	.	non-ssc	.	MAST2:NM_001319245:exon21:c.G2488A:p.E830K,MAST2:NM_001324321:exon21:c.G2026A:p.E676K,MAST2:NM_015112:exon21:c.G2488A:p.E830K,MAST2:NM_001324320:exon22:c.G2509A:p.E837K	.	.	.	.	.	.	.	.	.	.	.	.	.	.	.	.	.	.	.	.	.	.	.	.	.	.
6491	1p33	1	47746112	47746112	C	A	C>A	STIL	exonic	nonsynonymous SNV	DDD4K.00283	DDD_2017	28135719	4293	0	exome	Developmental Delay (DD)	psychiatric disorder	validated	.	non-ssc	.	STIL:NM_001048166:exon12:c.G2018T:p.S673I,STIL:NM_003035:exon12:c.G2018T:p.S673I,STIL:NM_001282936:exon13:c.G2018T:p.S673I,STIL:NM_001282937:exon13:c.G2018T:p.S673I,STIL:NM_001282938:exon14:c.G1877T:p.S626I,STIL:NM_001282939:exon14:c.G1877T:p.S626I	.	.	.	.	.	.	.	.	.	.	.	.	.	.	.	.	.	.	.	.	.	.	.	.	.	.
4998	1p32.3	1	52839017	52839017	T	C	T>C	ORC1	exonic	nonsynonymous SNV	DDD4K.02069	DDD_2017	28135719	4293	0	exome	Developmental Delay (DD)	psychiatric disorder	validated	.	non-ssc	.	ORC1:NM_001190818:exon17:c.A2422G:p.M808V,ORC1:NM_001190819:exon17:c.A2407G:p.M803V,ORC1:NM_004153:exon17:c.A2422G:p.M808V	.	.	.	.	.	.	.	.	.	.	.	.	.	.	.	.	.	.	.	.	.	.	.	.	.	.
199964	1p32.3	1	55457732	55457732	C	T	C>T	TMEM61	exonic	nonsynonymous SNV	DDD4K.01172	DDD_2017	28135719	4293	0	exome	Developmental Delay (DD)	psychiatric disorder	validated	.	non-ssc	.	TMEM61:NM_182532:exon3:c.C589T:p.R197C	0.0012	.	0.0029	.	.	0.0041	0.0001	0	0.0002	0.0001	0	1.51e-05	0	0.0006	.	.	.	.	.	rs184442175	.	.	.	.	.	.
114803	1p32.1	1	59147880	59147880	C	T	C>T	MYSM1	exonic	nonsynonymous SNV	DDD4K.00276	DDD_2017	28135719	4293	0	exome	Developmental Delay (DD)	psychiatric disorder	validated	.	non-ssc	.	MYSM1:NM_001085487:exon8:c.G836A:p.C279Y	.	.	.	.	.	.	2.49e-05	0	0	0	0	1.5e-05	0.0011	6.08e-05	0.0001	.	0.0001	.	.	rs374418454	.	.	.	.	.	.
5236	1p31.3	1	64095102	64095102	C	T	C>T	PGM1	exonic	nonsynonymous SNV	DDD4K.04137	DDD_2017	28135719	4293	0	exome	Developmental Delay (DD)	psychiatric disorder	validated	.	non-ssc	.	PGM1:NM_001172818:exon2:c.C307T:p.R103C,PGM1:NM_002633:exon2:c.C253T:p.R85C	.	.	.	.	.	.	8.24e-05	0	0	0.0002	0	8.99e-05	0	0.0001	0.0002	.	0.0003	.	.	rs150286818	.	.	.	.	.	.
3595	1p31.3	1	67845701	67845701	C	T	C>T	IL12RB2	exonic	nonsynonymous SNV	DDD4K.01726	DDD_2017	28135719	4293	0	exome	Developmental Delay (DD)	psychiatric disorder	validated	.	non-ssc	.	IL12RB2:NM_001258215:exon11:c.C1492T:p.P498S,IL12RB2:NM_001258216:exon13:c.C1750T:p.P584S,IL12RB2:NM_001559:exon13:c.C1750T:p.P584S,IL12RB2:NM_001258214:exon14:c.C1750T:p.P584S,IL12RB2:NM_001319233:exon14:c.C1750T:p.P584S	.	.	.	.	.	.	.	.	.	.	.	.	.	.	.	.	.	.	.	.	.	.	.	.	.	.
5876	1p31.1	1	76257975	76257975	A	G	A>G	RABGGTB	exonic	nonsynonymous SNV	DDD4K.01586	DDD_2017	28135719	4293	0	exome	Developmental Delay (DD)	psychiatric disorder	validated	.	non-ssc	.	RABGGTB:NM_004582:exon7:c.A689G:p.N230S	0.0002	.	.	.	0.001	.	3.3e-05	0	0	0	0	5.99e-05	0	0	0.0001	.	0.0001	.	.	rs200289228	COSM322965	1(lung);1(large_intestine)	.	.	.	.
26009	1p31.1	1	78045261	78045261	C	T	C>T	ZZZ3	exonic	nonsynonymous SNV	DDD4K.03977	DDD_2017	28135719	4293	0	exome	Developmental Delay (DD)	psychiatric disorder	validated	.	non-ssc	.	ZZZ3:NM_001308237:exon9:c.G551A:p.R184Q,ZZZ3:NM_015534:exon10:c.G2033A:p.R678Q	.	.	.	.	.	.	.	.	.	.	.	.	.	.	.	.	.	.	.	.	.	.	.	.	.	.
54810	1p31.1	1	78560637	78560637	G	T	G>T	GIPC2	exonic	nonsynonymous SNV	DDD4K.00922	DDD_2017	28135719	4293	0	exome	Developmental Delay (DD)	psychiatric disorder	validated	.	non-ssc	.	GIPC2:NM_001304725:exon3:c.G206T:p.R69I,GIPC2:NM_017655:exon3:c.G428T:p.R143I	.	.	.	.	.	.	.	.	.	.	.	.	.	.	.	.	.	.	.	.	COSM912354	1(endometrium)	.	.	.	.
23576	1p22.3	1	85787212	85787212	T	C	T>C	DDAH1	exonic	nonsynonymous SNV	DDD4K.01730	DDD_2017	28135719	4293	0	exome	Developmental Delay (DD)	psychiatric disorder	validated	.	non-ssc	.	DDAH1:NM_001330655:exon6:c.A481G:p.S161G,DDAH1:NM_012137:exon6:c.A781G:p.S261G,DDAH1:NM_001134445:exon7:c.A472G:p.S158G	.	.	.	.	.	.	.	.	.	.	.	.	.	.	.	.	.	.	.	.	.	.	.	.	.	.
1179	1p22.3	1	86939159	86939159	C	A	C>A	CLCA1	exonic	nonsynonymous SNV	DDD4K.03585	DDD_2017	28135719	4293	0	exome	Developmental Delay (DD)	psychiatric disorder	validated	.	non-ssc	.	CLCA1:NM_001285:exon2:c.C222A:p.F74L	.	.	.	.	.	.	.	.	.	.	.	.	.	.	.	.	.	.	.	rs770200727	.	.	.	.	.	.
5586	1p22.2	1	89270569	89270569	T	C	T>C	PKN2	exonic	nonsynonymous SNV	DDD4K.00213	DDD_2017	28135719	4293	0	exome	Developmental Delay (DD)	psychiatric disorder	validated	.	non-ssc	.	PKN2:NM_001320707:exon9:c.T1322C:p.L441P,PKN2:NM_001320708:exon9:c.T995C:p.L332P,PKN2:NM_001320709:exon10:c.T1418C:p.L473P,PKN2:NM_006256:exon10:c.T1466C:p.L489P	.	.	.	.	.	.	.	.	.	.	.	.	.	.	.	.	.	.	.	.	.	.	.	.	.	.
84146	1p22.2	1	91405611	91405611	C	G	C>G	ZNF644	exonic	nonsynonymous SNV	DDD4K.00811	DDD_2017	28135719	4293	0	exome	Developmental Delay (DD)	psychiatric disorder	validated	.	non-ssc	.	ZNF644:NM_201269:exon3:c.G1300C:p.D434H	.	.	.	.	.	.	.	.	.	.	.	.	.	.	.	.	.	.	.	.	.	.	.	.	.	.
343099	1p22.1	1	93701820	93701820	C	G	C>G	CCDC18	exonic	nonsynonymous SNV	DDD4K.03198	DDD_2017	28135719	4293	0	exome	Developmental Delay (DD)	psychiatric disorder	validated	.	non-ssc	.	CCDC18:NM_001306076:exon19:c.C2473G:p.Q825E,CCDC18:NM_206886:exon19:c.C2476G:p.Q826E	.	.	.	.	.	.	8.31e-06	0.0001	0	0	0	0	0	0	.	.	.	.	.	rs745352316	.	.	.	.	.	.
24	1p22.1	1	94466455	94466455	C	T	C>T	ABCA4	exonic	nonsynonymous SNV	DDD4K.02647	DDD_2017	28135719	4293	0	exome	Developmental Delay (DD)	psychiatric disorder	validated	.	non-ssc	.	ABCA4:NM_000350:exon47:c.G6416A:p.R2139Q	.	.	.	.	.	.	0.0002	0	0	0	0	4.5e-05	0	0.0013	.	.	.	.	.	rs761867791	.	.	Uncertain significance|Uncertain significance|Uncertain significance|Uncertain significance	Retinitis_Pigmentosa\x2c_Recessive|Stargardt_Disease\x2c_Recessive|Macular_degeneration|Cone-Rod_Dystrophy\x2c_Recessive	RCV000264727.1|RCV000280073.1|RCV000319805.1|RCV000374572.1	MedGen|MedGen|Human_Phenotype_Ontology:MedGen|MedGen
1301	1p21.1	1	103427786	103427786	A	T	A>T	COL11A1	exonic	nonsynonymous SNV	DDD4K.01712	DDD_2017	28135719	4293	0	exome	Developmental Delay (DD)	psychiatric disorder	validated	.	non-ssc	.	COL11A1:NM_080630:exon38:c.T2712A:p.D904E,COL11A1:NM_001190709:exon39:c.T2943A:p.D981E,COL11A1:NM_001854:exon40:c.T3060A:p.D1020E,COL11A1:NM_080629:exon40:c.T3096A:p.D1032E	.	.	.	.	.	.	.	.	.	.	.	.	.	.	.	.	.	.	.	.	.	.	.	.	.	.
81839	1p13.1	1	116227955	116227955	G	A	G>A	VANGL1	exonic	nonsynonymous SNV	DDD4K.03060	DDD_2017	28135719	4293	0	exome	Developmental Delay (DD)	psychiatric disorder	validated	.	non-ssc	.	VANGL1:NM_001172411:exon7:c.G1115A:p.R372H,VANGL1:NM_001172412:exon7:c.G1121A:p.R374H,VANGL1:NM_138959:exon7:c.G1121A:p.R374H	.	.	.	.	.	.	4.96e-05	0	0.0004	0	0	1.5e-05	0	0	.	.	.	.	.	rs759665824	COSM5754140	1(large_intestine)	.	.	.	.
476	1p13.1	1	116932213	116932213	G	C	G>C	ATP1A1	exonic	nonsynonymous SNV	DDD4K.04119	DDD_2017	28135719	4293	0	exome	Developmental Delay (DD)	psychiatric disorder	validated	.	non-ssc	.	ATP1A1:NM_000701:exon8:c.G907C:p.G303R,ATP1A1:NM_001160233:exon8:c.G907C:p.G303R,ATP1A1:NM_001160234:exon8:c.G814C:p.G272R	.	.	.	.	.	.	.	.	.	.	.	.	.	.	.	.	.	.	.	.	.	.	.	.	.	.
965	1p13.1	1	117064570	117064570	G	A	G>A	CD58	exonic	nonsynonymous SNV	DDD4K.04002	DDD_2017	28135719	4293	0	exome	Developmental Delay (DD)	psychiatric disorder	validated	.	non-ssc	.	CD58:NM_001144822:exon4:c.C664T:p.P222S,CD58:NM_001779:exon4:c.C664T:p.P222S	.	.	.	.	.	.	.	.	.	.	.	.	.	.	.	.	.	.	.	.	.	.	.	.	.	.
9398	1p13.1	1	117560939	117560939	C	T	C>T	CD101	exonic	nonsynonymous SNV	DDD4K.00321	DDD_2017	28135719	4293	0	exome	Developmental Delay (DD)	psychiatric disorder	validated	.	non-ssc	.	CD101:NM_001256106:exon6:c.C1774T:p.L592F,CD101:NM_001256109:exon6:c.C1774T:p.L592F,CD101:NM_001256111:exon6:c.C1588T:p.L530F,CD101:NM_004258:exon6:c.C1774T:p.L592F	.	.	.	.	.	.	.	.	.	.	.	.	.	.	.	.	.	.	.	.	.	.	.	.	.	.
2703	1q21.2	1	147380372	147380372	T	G	T>G	GJA8	exonic	nonsynonymous SNV	DDD4K.00155	DDD_2017	28135719	4293	0	exome	Developmental Delay (DD)	psychiatric disorder	validated	.	non-ssc	.	GJA8:NM_005267:exon2:c.T290G:p.V97G	.	.	.	.	.	.	.	.	.	.	.	.	.	.	.	.	.	.	.	.	.	.	.	.	.	.
9900	1q21.2	1	149885139	149885139	T	C	T>C	SV2A	exonic	nonsynonymous SNV	DDD4K.03753	DDD_2017	28135719	4293	0	exome	Developmental Delay (DD)	psychiatric disorder	validated	.	non-ssc	.	SV2A:NM_001328674:exon2:c.A254G:p.E85G,SV2A:NM_001328675:exon2:c.A254G:p.E85G,SV2A:NM_014849:exon2:c.A254G:p.E85G	.	.	.	.	.	.	.	.	.	.	.	.	.	.	.	.	.	.	.	.	.	.	.	.	.	.
23248	1q21.3	1	150444800	150444800	G	A	G>A	RPRD2	exonic	nonsynonymous SNV	DDD4K.03573	DDD_2017	28135719	4293	0	exome	Developmental Delay (DD)	psychiatric disorder	validated	.	non-ssc	.	RPRD2:NM_001297674:exon10:c.G3298A:p.V1100M,RPRD2:NM_015203:exon11:c.G3376A:p.V1126M	.	.	.	.	.	.	.	.	.	.	.	.	.	.	.	.	.	.	.	.	.	.	.	.	.	.
4170	1q21.3	1	150550901	150550901	T	C	T>C	MCL1	exonic	nonsynonymous SNV	DDD4K.00021	DDD_2017	28135719	4293	0	exome	Developmental Delay (DD)	psychiatric disorder	validated	.	non-ssc	.	MCL1:NM_021960:exon2:c.A755G:p.H252R,MCL1:NM_001197320:exon3:c.A296G:p.H99R	.	.	.	.	.	.	.	.	.	.	.	.	.	.	.	.	.	.	.	.	.	.	.	.	.	.
9869	1q21.3	1	150902444	150902444	G	A	G>A	SETDB1	exonic	nonsynonymous SNV	DDD4K.01195	DDD_2017	28135719	4293	0	exome	Developmental Delay (DD)	psychiatric disorder	validated	.	non-ssc	.	SETDB1:NM_001145415:exon3:c.G262A:p.A88T,SETDB1:NM_001243491:exon3:c.G262A:p.A88T,SETDB1:NM_012432:exon3:c.G262A:p.A88T	.	.	.	.	.	.	.	.	.	.	.	.	.	.	.	.	.	.	.	.	.	.	.	.	.	.
126638	1q21.3	1	152130281	152130281	A	G	A>G	RPTN	exonic	nonsynonymous SNV	DDD4K.00320	DDD_2017	28135719	4293	0	exome	Developmental Delay (DD)	psychiatric disorder	validated	.	non-ssc	.	RPTN:NM_001122965:exon2:c.T85C:p.C29R	.	.	.	.	.	.	.	.	.	.	.	.	.	.	.	.	.	.	.	.	.	.	.	.	.	.
4209	1q22	1	156450637	156450637	G	A	G>A	MEF2D	exonic	nonsynonymous SNV	DDD4K.01393	DDD_2017	28135719	4293	0	exome	Developmental Delay (DD)	psychiatric disorder	validated	.	non-ssc	.	MEF2D:NM_001271629:exon4:c.C385T:p.R129W,MEF2D:NM_005920:exon4:c.C385T:p.R129W	.	.	.	.	.	.	.	.	.	.	.	.	.	.	.	.	.	.	.	.	.	.	.	.	.	.
3645	1q23.1	1	156812858	156812858	G	A	G>A	INSRR	exonic	nonsynonymous SNV	DDD4K.01077	DDD_2017	28135719	4293	0	exome	Developmental Delay (DD)	psychiatric disorder	validated	.	non-ssc	.	INSRR:NM_014215:exon17:c.C3064T:p.R1022W	.	.	.	.	.	.	3.3e-05	9.61e-05	0	0	0	4.5e-05	0	0	0.0002	.	0.0002	.	.	rs146178624	COSM1582200;COSM1582201	1(stomach)	.	.	.	.
391112	1q23.1	1	158517262	158517262	T	A	T>A	OR6Y1	exonic	nonsynonymous SNV	DDD4K.01620	DDD_2017	28135719	4293	0	exome	Developmental Delay (DD)	psychiatric disorder	validated	.	non-ssc	.	OR6Y1:NM_001005189:exon1:c.A634T:p.I212F	.	.	.	.	.	.	.	.	.	.	.	.	.	.	.	.	.	.	.	.	.	.	.	.	.	.
89886	1q23.2	1	159923257	159923257	G	A	G>A	SLAMF9	exonic	nonsynonymous SNV	DDD4K.03853	DDD_2017	28135719	4293	0	exome	Developmental Delay (DD)	psychiatric disorder	validated	.	non-ssc	.	SLAMF9:NM_001146172:exon2:c.C233T:p.T78I,SLAMF9:NM_001146173:exon2:c.C233T:p.T78I,SLAMF9:NM_033438:exon2:c.C233T:p.T78I	.	.	.	.	.	.	.	.	.	.	.	.	.	.	.	.	.	.	.	.	.	.	.	.	.	.
477	1q23.2	1	160098520	160098520	G	T	G>T	ATP1A2	exonic	nonsynonymous SNV	DDD4K.03046	DDD_2017	28135719	4293	0	exome	Developmental Delay (DD)	psychiatric disorder	validated	.	non-ssc	.	ATP1A2:NM_000702:exon9:c.G1096T:p.G366C	.	.	.	.	.	.	.	.	.	.	.	.	.	.	.	.	.	.	.	.	.	.	.	.	.	.
477	1q23.2	1	160098521	160098521	G	C	G>C	ATP1A2	exonic	nonsynonymous SNV	DDD4K.00471	DDD_2017	28135719	4293	0	exome	Developmental Delay (DD)	psychiatric disorder	validated	.	non-ssc	.	ATP1A2:NM_000702:exon9:c.G1097C:p.G366A	.	.	.	.	.	.	.	.	.	.	.	.	.	.	.	.	.	.	.	.	.	.	Uncertain significance	not_specified	RCV000412726.1	MedGen
5824	1q23.2	1	160249394	160249394	G	A	G>A	PEX19	exonic	nonsynonymous SNV	DDD4K.00700	DDD_2017	28135719	4293	0	exome	Developmental Delay (DD)	psychiatric disorder	validated	.	non-ssc	.	PEX19:NM_002857:exon8:c.C847T:p.L283F	.	.	.	.	.	.	.	.	.	.	.	.	.	.	.	.	.	.	.	.	.	.	.	.	.	.
4063	1q23.3	1	160794025	160794025	A	G	A>G	LY9	exonic	nonsynonymous SNV	DDD4K.04175	DDD_2017	28135719	4293	0	exome	Developmental Delay (DD)	psychiatric disorder	validated	.	non-ssc	.	LY9:NM_001261457:exon8:c.A1615G:p.I539V,LY9:NM_001261456:exon9:c.A1843G:p.I615V,LY9:NM_002348:exon9:c.A1885G:p.I629V	.	.	.	.	.	.	.	.	.	.	.	.	.	.	.	.	.	.	.	.	.	.	.	.	.	.
51744	1q23.3	1	160801169	160801169	T	C	T>C	CD244	exonic	nonsynonymous SNV	DDD4K.00413	DDD_2017	28135719	4293	0	exome	Developmental Delay (DD)	psychiatric disorder	validated	.	non-ssc	.	CD244:NM_001166664:exon8:c.A790G:p.K264E,CD244:NM_001166663:exon9:c.A1081G:p.K361E,CD244:NM_016382:exon9:c.A1066G:p.K356E	.	.	.	.	.	.	.	.	.	.	.	.	.	.	.	.	.	.	.	.	.	.	.	.	.	.
5498	1q23.3	1	161137007	161137007	G	A	G>A	PPOX	exonic	nonsynonymous SNV	DDD4K.02799	DDD_2017	28135719	4293	0	exome	Developmental Delay (DD)	psychiatric disorder	validated	.	non-ssc	.	PPOX:NM_000309:exon3:c.G205A:p.A69T,PPOX:NM_001122764:exon3:c.G205A:p.A69T,PPOX:NM_001350128:exon3:c.G205A:p.A69T	.	.	.	.	.	.	.	.	.	.	.	.	.	.	.	.	.	.	.	.	.	.	.	.	.	.
5087	1q23.3	1	164776781	164776781	G	A	G>A	PBX1	exonic	nonsynonymous SNV	DDD4K.02255	DDD_2017	28135719	4293	0	exome	Developmental Delay (DD)	psychiatric disorder	validated	.	non-ssc	.	PBX1:NM_001204961:exon5:c.G704A:p.R235Q,PBX1:NM_001204963:exon5:c.G704A:p.R235Q,PBX1:NM_002585:exon5:c.G704A:p.R235Q	.	.	.	.	.	.	.	.	.	.	.	.	.	.	.	.	.	.	.	.	.	.	.	.	.	.
5087	1q23.3	1	164776855	164776855	T	C	T>C	PBX1	exonic	nonsynonymous SNV	DDD4K.04011	DDD_2017	28135719	4293	0	exome	Developmental Delay (DD)	psychiatric disorder	validated	.	non-ssc	.	PBX1:NM_001204961:exon5:c.T778C:p.Y260H,PBX1:NM_001204963:exon5:c.T778C:p.Y260H,PBX1:NM_002585:exon5:c.T778C:p.Y260H	.	.	.	.	.	.	.	.	.	.	.	.	.	.	.	.	.	.	.	.	.	.	.	.	.	.
223	1q24.1	1	165649827	165649827	A	T	A>T	ALDH9A1	exonic	nonsynonymous SNV	DDD4K.00913	DDD_2017	28135719	4293	0	exome	Developmental Delay (DD)	psychiatric disorder	validated	.	non-ssc	.	ALDH9A1:NM_000696:exon5:c.T686A:p.L229H	.	.	.	.	.	.	.	.	.	.	.	.	.	.	.	.	.	.	.	.	.	.	.	.	.	.
84614	1q25.1	1	173839494	173839494	G	A	G>A	ZBTB37	exonic	nonsynonymous SNV	DDD4K.04244	DDD_2017	28135719	4293	0	exome	Developmental Delay (DD)	psychiatric disorder	validated	.	non-ssc	.	ZBTB37:NM_001122770:exon3:c.G131A:p.R44Q,ZBTB37:NM_001346115:exon3:c.G131A:p.R44Q,ZBTB37:NM_032522:exon3:c.G131A:p.R44Q	.	.	.	.	.	.	1.65e-05	0	0	0	0	3e-05	0	0	.	.	.	.	.	rs751174723	.	.	.	.	.	.
63923	1q25.1	1	175046825	175046825	C	T	C>T	TNN	exonic	nonsynonymous SNV	DDD4K.04021	DDD_2017	28135719	4293	0	exome	Developmental Delay (DD)	psychiatric disorder	validated	.	non-ssc	.	TNN:NM_022093:exon2:c.C271T:p.R91C	.	.	.	.	.	.	2.48e-05	0	0	0	0	4.51e-05	0	0	.	.	.	.	.	rs747301590	.	.	.	.	.	.
9917	1q25.2	1	179033597	179033597	G	A	G>A	FAM20B	exonic	nonsynonymous SNV	DDD4K.02213	DDD_2017	28135719	4293	0	exome	Developmental Delay (DD)	psychiatric disorder	validated	.	non-ssc	.	FAM20B:NM_001324310:exon6:c.G904A:p.A302T,FAM20B:NM_001324311:exon6:c.G904A:p.A302T,FAM20B:NM_014864:exon6:c.G904A:p.A302T	.	.	.	.	.	.	8.31e-06	0	0	0.0001	0	0	0	0	.	.	.	.	.	rs754878367	COSM5992422	1(prostate)	.	.	.	.
777	1q25.3	1	181546967	181546967	G	A	G>A	CACNA1E	exonic	nonsynonymous SNV	DDD4K.02730	DDD_2017	28135719	4293	0	exome	Developmental Delay (DD)	psychiatric disorder	validated	.	non-ssc	.	CACNA1E:NM_000721:exon4:c.G578A:p.R193H,CACNA1E:NM_001205293:exon4:c.G578A:p.R193H,CACNA1E:NM_001205294:exon4:c.G578A:p.R193H	.	.	.	.	.	.	.	.	.	.	.	.	.	.	.	.	.	.	.	.	.	.	.	.	.	.
777	1q25.3	1	181549809	181549809	T	A	T>A	CACNA1E	exonic	nonsynonymous SNV	DDD4K.00117	DDD_2017	28135719	4293	0	exome	Developmental Delay (DD)	psychiatric disorder	validated	.	non-ssc	.	CACNA1E:NM_000721:exon6:c.T848A:p.I283N,CACNA1E:NM_001205293:exon6:c.T848A:p.I283N,CACNA1E:NM_001205294:exon6:c.T848A:p.I283N	.	.	.	.	.	.	.	.	.	.	.	.	.	.	.	.	.	.	.	.	COSM900527	1(endometrium)	.	.	.	.
777	1q25.3	1	181726197	181726197	A	T	A>T	CACNA1E	exonic	nonsynonymous SNV	DDD4K.02894	DDD_2017	28135719	4293	0	exome	Developmental Delay (DD)	psychiatric disorder	validated	.	non-ssc	.	CACNA1E:NM_001205294:exon29:c.A4207T:p.I1403F,CACNA1E:NM_000721:exon30:c.A4264T:p.I1422F,CACNA1E:NM_001205293:exon30:c.A4264T:p.I1422F	.	.	.	.	.	.	.	.	.	.	.	.	.	.	.	.	.	.	.	.	.	.	.	.	.	.
353299	1q25.3	1	182491180	182491180	C	T	C>T	RGSL1	exonic	nonsynonymous SNV	DDD4K.01712	DDD_2017	28135719	4293	0	exome	Developmental Delay (DD)	psychiatric disorder	validated	.	non-ssc	.	RGSL1:NM_001137669:exon10:c.C1867T:p.R623C	.	.	.	.	.	.	0.0001	0.0007	0	0	0	0	0	0.0001	.	.	.	.	.	rs748623780	COSM1336938;COSM1336937	1(large_intestine)	.	.	.	.
339479	1q31.1	1	190423895	190423895	G	A	G>A	BRINP3	exonic	nonsynonymous SNV	DDD4K.01217	DDD_2017	28135719	4293	0	exome	Developmental Delay (DD)	psychiatric disorder	validated	.	non-ssc	.	BRINP3:NM_001317188:exon2:c.C11T:p.A4V	.	.	.	.	.	.	.	.	.	.	.	.	.	.	.	.	.	.	.	.	.	.	.	.	.	.
51377	1q31.2	1	192993065	192993065	C	T	C>T	UCHL5	exonic	nonsynonymous SNV	DDD4K.01144	DDD_2017	28135719	4293	0	exome	Developmental Delay (DD)	psychiatric disorder	validated	.	non-ssc	.	UCHL5:NM_001199261:exon8:c.G641A:p.G214D,UCHL5:NM_001199262:exon8:c.G641A:p.G214D,UCHL5:NM_001199263:exon8:c.G641A:p.G214D,UCHL5:NM_001350844:exon8:c.G701A:p.G234D,UCHL5:NM_001350846:exon8:c.G614A:p.G205D,UCHL5:NM_001350847:exon8:c.G614A:p.G205D,UCHL5:NM_001350848:exon8:c.G269A:p.G90D,UCHL5:NM_001350849:exon8:c.G269A:p.G90D,UCHL5:NM_001350850:exon8:c.G269A:p.G90D,UCHL5:NM_001350851:exon8:c.G269A:…	.	.	.	.	.	.	.	.	.	.	.	.	.	.	.	.	.	.	.	.	.	.	.	.	.	.
360023	1q31.3	1	197150209	197150209	C	T	C>T	ZBTB41	exonic	nonsynonymous SNV	DDD4K.03271	DDD_2017	28135719	4293	0	exome	Developmental Delay (DD)	psychiatric disorder	validated	.	non-ssc	.	ZBTB41:NM_194314:exon5:c.G1585A:p.D529N	.	.	.	.	.	.	.	.	.	.	.	.	.	.	.	.	.	.	.	.	.	.	.	.	.	.
55705	1q32.1	1	201816449	201816449	G	A	G>A	IPO9	exonic	nonsynonymous SNV	DDD4K.03410	DDD_2017	28135719	4293	0	exome	Developmental Delay (DD)	psychiatric disorder	validated	.	non-ssc	.	IPO9:NM_018085:exon2:c.G206A:p.G69E	.	.	.	.	.	.	.	.	.	.	.	.	.	.	.	.	.	.	.	.	.	.	.	.	.	.
5778	1q32.1	1	202121749	202121749	G	T	G>T	PTPN7	exonic	nonsynonymous SNV	DDD4K.02944	DDD_2017	28135719	4293	0	exome	Developmental Delay (DD)	psychiatric disorder	validated	.	non-ssc	.	PTPN7:NM_080588:exon7:c.C913A:p.P305T,PTPN7:NM_001199797:exon8:c.C1018A:p.P340T,PTPN7:NM_002832:exon8:c.C1111A:p.P371T	.	.	.	.	.	.	.	.	.	.	.	.	.	.	.	.	.	.	.	.	.	.	.	.	.	.
22874	1q32.1	1	204198229	204198229	G	A	G>A	PLEKHA6	exonic	nonsynonymous SNV	DDD4K.03199	DDD_2017	28135719	4293	0	exome	Developmental Delay (DD)	psychiatric disorder	validated	.	non-ssc	.	PLEKHA6:NM_014935:exon19:c.C2587T:p.R863C	.	.	.	.	.	.	1.67e-05	9.89e-05	0	0	0	1.51e-05	0	0	.	.	.	.	.	rs763395929	.	.	.	.	.	.
5287	1q32.1	1	204425156	204425156	C	T	C>T	PIK3C2B	exonic	nonsynonymous SNV	DDD4K.00919	DDD_2017	28135719	4293	0	exome	Developmental Delay (DD)	psychiatric disorder	validated	.	non-ssc	.	PIK3C2B:NM_002646:exon12:c.G1771A:p.A591T	0.0002	.	.	0.001	.	.	.	.	.	.	.	.	.	.	.	.	.	.	.	rs190353079	.	.	.	.	.	.
85414	1q32.1	1	205628673	205628673	T	C	T>C	SLC45A3	exonic	nonsynonymous SNV	DDD4K.00559	DDD_2017	28135719	4293	0	exome	Developmental Delay (DD)	psychiatric disorder	validated	.	non-ssc	.	SLC45A3:NM_033102:exon5:c.A1351G:p.S451G	.	.	.	.	.	.	.	.	.	.	.	.	.	.	.	.	.	.	.	.	.	.	.	.	.	.
115019	1q32.1	1	205896718	205896718	C	T	C>T	SLC26A9	exonic	nonsynonymous SNV	DDD4K.03578	DDD_2017	28135719	4293	0	exome	Developmental Delay (DD)	psychiatric disorder	validated	.	non-ssc	.	SLC26A9:NM_052934:exon10:c.G1117A:p.G373S,SLC26A9:NM_134325:exon10:c.G1117A:p.G373S	0.0002	.	.	0.001	.	.	5.93e-05	0	0	0.0008	0	0	0	0	.	.	.	.	.	rs570356378	COSM326482;COSM326481	1(lung)	.	.	.	.
722	1q32.2	1	207287558	207287558	G	A	G>A	C4BPA	exonic	nonsynonymous SNV	DDD4K.01836	DDD_2017	28135719	4293	0	exome	Developmental Delay (DD)	psychiatric disorder	validated	.	non-ssc	.	C4BPA:NM_000715:exon3:c.G256A:p.V86I	.	.	.	.	.	.	8.25e-06	9.61e-05	0	0	0	0	0	0	0.0001	.	0.0001	.	.	rs376241781	COSM5757646	1(bone)	.	.	.	.
3756	1q32.2	1	210977491	210977491	T	C	T>C	KCNH1	exonic	nonsynonymous SNV	DDD4K.03627	DDD_2017	28135719	4293	0	exome	Developmental Delay (DD)	psychiatric disorder	validated	.	non-ssc	.	KCNH1:NM_002238:exon8:c.A1399G:p.I467V,KCNH1:NM_172362:exon8:c.A1480G:p.I494V	.	.	.	.	.	.	.	.	.	.	.	.	.	.	.	.	.	.	.	rs727502819	.	.	Pathogenic|Pathogenic	Temple-Baraitser_syndrome|Zimmermann-Laband_syndrome_1	RCV000149910.6|RCV000185590.5	MedGen:OMIM:Orphanet|Gene:MedGen:OMIM
1063	1q41	1	214820465	214820465	G	C	G>C	CENPF	exonic	nonsynonymous SNV	DDD4K.04213	DDD_2017	28135719	4293	0	exome	Developmental Delay (DD)	psychiatric disorder	validated	.	non-ssc	.	CENPF:NM_016343:exon13:c.G7552C:p.E2518Q	.	.	.	.	.	.	.	.	.	.	.	.	.	.	.	.	.	.	.	.	.	.	.	.	.	.
55532	1q41	1	220088902	220088902	G	T	G>T	SLC30A10	exonic	nonsynonymous SNV	DDD4K.01409	DDD_2017	28135719	4293	0	exome	Developmental Delay (DD)	psychiatric disorder	validated	.	non-ssc	.	SLC30A10:NM_018713:exon4:c.C1347A:p.D449E	.	.	.	.	.	.	.	.	.	.	.	.	.	.	.	.	.	.	.	.	.	.	.	.	.	.
4139	1q41	1	220791791	220791791	A	G	A>G	MARK1	exonic	nonsynonymous SNV	DDD4K.03986	DDD_2017	28135719	4293	0	exome	Developmental Delay (DD)	psychiatric disorder	validated	.	non-ssc	.	MARK1:NM_001286128:exon7:c.A626G:p.K209R,MARK1:NM_001286124:exon8:c.A692G:p.K231R,MARK1:NM_001286126:exon8:c.A692G:p.K231R,MARK1:NM_018650:exon8:c.A692G:p.K231R	.	.	.	.	.	.	.	.	.	.	.	.	.	.	.	.	.	.	.	.	.	.	.	.	.	.
55061	1q41	1	223465814	223465814	T	C	T>C	SUSD4	exonic	nonsynonymous SNV	DDD4K.01042	DDD_2017	28135719	4293	0	exome	Developmental Delay (DD)	psychiatric disorder	validated	.	non-ssc	.	SUSD4:NM_001037175:exon3:c.A328G:p.I110V,SUSD4:NM_017982:exon3:c.A328G:p.I110V	.	.	.	.	.	.	.	.	.	.	.	.	.	.	.	.	.	.	.	.	.	.	.	.	.	.
80232	1q42.12	1	224612222	224612222	A	C	A>C	WDR26	exonic	nonsynonymous SNV	DDD4K.00266	DDD_2017	28135719	4293	0	exome	Developmental Delay (DD)	psychiatric disorder	validated	.	non-ssc	.	WDR26:NM_001115113:exon4:c.T714G:p.S238R,WDR26:NM_025160:exon4:c.T762G:p.S254R	.	.	.	.	.	.	.	.	.	.	.	.	.	.	.	.	.	.	.	.	.	.	.	.	.	.
29920	1q42.12	1	226109948	226109948	C	T	C>T	PYCR2	exonic	nonsynonymous SNV	DDD4K.02372	DDD_2017	28135719	4293	0	exome	Developmental Delay (DD)	psychiatric disorder	validated	.	non-ssc	.	PYCR2:NM_001271681:exon3:c.G274A:p.V92M,PYCR2:NM_013328:exon3:c.G274A:p.V92M	0.0002	0.0008	.	.	.	.	3.31e-05	9.64e-05	0	0	0	4.51e-05	0	0	0.0001	.	0.0001	.	.	rs200064314	.	.	.	.	.	.
3020	1q42.12	1	226253472	226253472	G	C	G>C	H3F3A	exonic	nonsynonymous SNV	DDD4K.00776	DDD_2017	28135719	4293	0	exome	Developmental Delay (DD)	psychiatric disorder	validated	.	non-ssc	.	H3F3A:NM_002107:exon3:c.G244C:p.D82H	.	.	.	.	.	.	.	.	.	.	.	.	.	.	.	.	.	.	.	.	.	.	.	.	.	.
8476	1q42.13	1	227279600	227279600	C	T	C>T	CDC42BPA	exonic	nonsynonymous SNV	DDD4K.00029	DDD_2017	28135719	4293	0	exome	Developmental Delay (DD)	psychiatric disorder	validated	.	non-ssc	.	CDC42BPA:NM_014826:exon15:c.G2099A:p.S700N,CDC42BPA:NM_003607:exon16:c.G2342A:p.S781N	.	.	.	.	.	.	.	.	.	.	.	.	.	.	.	.	.	.	.	.	.	.	.	.	.	.
55127	1q43	1	236729269	236729269	C	T	C>T	HEATR1	exonic	nonsynonymous SNV	DDD4K.01630	DDD_2017	28135719	4293	0	exome	Developmental Delay (DD)	psychiatric disorder	validated	.	non-ssc	.	HEATR1:NM_018072:exon31:c.G4385A:p.S1462N	.	.	.	.	.	.	.	.	.	.	.	.	.	.	.	.	.	.	.	.	.	.	.	.	.	.
6262	1q43	1	237693752	237693752	G	A	G>A	RYR2	exonic	nonsynonymous SNV	DDD4K.02196	DDD_2017	28135719	4293	0	exome	Developmental Delay (DD)	psychiatric disorder	validated	.	non-ssc	.	RYR2:NM_001035:exon25:c.G2848A:p.V950M	.	.	.	.	.	.	.	.	.	.	.	.	.	.	.	.	.	.	.	.	.	.	.	.	.	.
6262	1q43	1	237778019	237778019	T	A	T>A	RYR2	exonic	nonsynonymous SNV	DDD4K.00499	DDD_2017	28135719	4293	0	exome	Developmental Delay (DD)	psychiatric disorder	validated	.	non-ssc	.	RYR2:NM_001035:exon37:c.T5591A:p.L1864Q	.	.	.	.	.	.	.	.	.	.	.	.	.	.	.	.	.	.	.	.	.	.	.	.	.	.
6262	1q43	1	237780706	237780706	G	A	G>A	RYR2	exonic	nonsynonymous SNV	DDD4K.03165	DDD_2017	28135719	4293	0	exome	Developmental Delay (DD)	psychiatric disorder	validated	.	non-ssc	.	RYR2:NM_001035:exon38:c.G5836A:p.E1946K	.	.	.	.	.	.	.	.	.	.	.	.	.	.	.	.	.	.	.	rs267598436	COSM3864888;COSM1224489	1(skin);1(large_intestine)	Uncertain significance	not_specified	RCV000182738.2	MedGen
6262	1q43	1	237794818	237794818	G	A	G>A	RYR2	exonic	nonsynonymous SNV	DDD4K.03411	DDD_2017	28135719	4293	0	exome	Developmental Delay (DD)	psychiatric disorder	validated	.	non-ssc	.	RYR2:NM_001035:exon42:c.G6532A:p.V2178I	.	.	.	.	.	.	.	.	.	.	.	.	.	.	.	.	.	.	.	rs794728821	.	.	Uncertain significance	not_specified	RCV000182874.2	MedGen
6262	1q43	1	237811912	237811912	C	T	C>T	RYR2	exonic	nonsynonymous SNV	DDD4K.00576	DDD_2017	28135719	4293	0	exome	Developmental Delay (DD)	psychiatric disorder	validated	.	non-ssc	.	RYR2:NM_001035:exon49:c.C7511T:p.T2504M	.	.	.	.	.	.	8.56e-05	0.0004	0	0.0002	0	6.92e-05	0	0	.	.	.	.	.	rs769219555	.	.	.	.	.	.
6262	1q43	1	237890420	237890420	T	C	T>C	RYR2	exonic	nonsynonymous SNV	DDD4K.01782	DDD_2017	28135719	4293	0	exome	Developmental Delay (DD)	psychiatric disorder	validated	.	non-ssc	.	RYR2:NM_001035:exon76:c.T10759C:p.W3587R	.	.	.	.	.	.	.	.	.	.	.	.	.	.	.	.	.	.	.	.	.	.	.	.	.	.
6262	1q43	1	237982492	237982492	G	T	G>T	RYR2	exonic	nonsynonymous SNV	DDD4K.03079	DDD_2017	28135719	4293	0	exome	Developmental Delay (DD)	psychiatric disorder	validated	.	non-ssc	.	RYR2:NM_001035:exon101:c.G14590T:p.G4864C	.	.	.	.	.	.	.	.	.	.	.	.	.	.	.	.	.	.	.	.	.	.	.	.	.	.
6262	1q43	1	237995919	237995919	G	A	G>A	RYR2	exonic	nonsynonymous SNV	DDD4K.00791	DDD_2017	28135719	4293	0	exome	Developmental Delay (DD)	psychiatric disorder	validated	.	non-ssc	.	RYR2:NM_001035:exon105:c.G14876A:p.R4959Q	.	.	.	.	.	.	.	.	.	.	.	.	.	.	.	.	.	.	.	rs794728811	COSM5792980;COSM906287	1(breast);1(endometrium)	Pathogenic|Pathogenic	not_provided|Ventricular_tachycardia\x2c_catecholaminergic_polymorphic\x2c_1	RCV000182854.2|RCV000445354.1	MedGen|MedGen:OMIM
10472	1q44	1	244218467	244218467	G	A	G>A	ZBTB18	exonic	nonsynonymous SNV	DDD4K.01165	DDD_2017	28135719	4293	0	exome	Developmental Delay (DD)	psychiatric disorder	validated	.	non-ssc	.	ZBTB18:NM_006352:exon1:c.G1364A:p.R455H,ZBTB18:NM_001278196:exon2:c.G1364A:p.R455H,ZBTB18:NM_205768:exon2:c.G1391A:p.R464H	.	.	.	.	.	.	.	.	.	.	.	.	.	.	.	.	.	.	.	.	.	.	.	.	.	.
10771	10p15.3	10	294310	294310	G	A	G>A	ZMYND11	exonic	nonsynonymous SNV	DDD4K.04037	DDD_2017	28135719	4293	0	exome	Developmental Delay (DD)	psychiatric disorder	validated	.	non-ssc	.	ZMYND11:NM_001202465:exon11:c.G1007A:p.S336N,ZMYND11:NM_001202467:exon11:c.G1100A:p.S367N,ZMYND11:NM_001202464:exon12:c.G1100A:p.S367N,ZMYND11:NM_001202466:exon12:c.G1097A:p.S366N,ZMYND11:NM_001202468:exon12:c.G1262A:p.S421N,ZMYND11:NM_006624:exon13:c.G1262A:p.S421N,ZMYND11:NM_212479:exon13:c.G1259A:p.S420N,ZMYND11:NM_001330057:exon14:c.G1211A:p.S404N	.	.	.	.	.	.	.	.	.	.	.	.	.	.	.	.	.	.	.	.	.	.	Pathogenic	Mental_retardation\x2c_autosomal_dominant_30	RCV000210880.1	MedGen:OMIM
10771	10p15.3	10	294525	294525	G	A	G>A	ZMYND11	exonic	nonsynonymous SNV	DDD4K.02842	DDD_2017	28135719	4293	0	exome	Developmental Delay (DD)	psychiatric disorder	validated	.	non-ssc	.	ZMYND11:NM_001202465:exon11:c.G1222A:p.V408I,ZMYND11:NM_001202467:exon11:c.G1315A:p.V439I,ZMYND11:NM_001202464:exon12:c.G1315A:p.V439I,ZMYND11:NM_001202466:exon12:c.G1312A:p.V438I,ZMYND11:NM_001202468:exon12:c.G1477A:p.V493I,ZMYND11:NM_006624:exon13:c.G1477A:p.V493I,ZMYND11:NM_212479:exon13:c.G1474A:p.V492I,ZMYND11:NM_001330057:exon14:c.G1426A:p.V476I	.	.	.	.	.	.	.	.	.	.	.	.	.	.	.	.	.	.	.	.	.	.	.	.	.	.
10771	10p15.3	10	298321	298321	T	C	T>C	ZMYND11	exonic	nonsynonymous SNV	DDD4K.01879	DDD_2017	28135719	4293	0	exome	Developmental Delay (DD)	psychiatric disorder	validated	.	non-ssc	.	ZMYND11:NM_001202465:exon13:c.T1465C:p.C489R,ZMYND11:NM_001202464:exon14:c.T1558C:p.C520R,ZMYND11:NM_001202466:exon14:c.T1555C:p.C519R,ZMYND11:NM_006624:exon15:c.T1720C:p.C574R,ZMYND11:NM_001330057:exon16:c.T1669C:p.C557R	.	.	.	.	.	.	.	.	.	.	.	.	.	.	.	.	.	.	.	.	.	.	.	.	.	.
10771	10p15.3	10	298399	298399	C	T	C>T	ZMYND11	exonic	nonsynonymous SNV	DDD4K.03339	DDD_2017	28135719	4293	0	exome	Developmental Delay (DD)	psychiatric disorder	validated	.	non-ssc	.	ZMYND11:NM_001202465:exon13:c.C1543T:p.R515W,ZMYND11:NM_001202464:exon14:c.C1636T:p.R546W,ZMYND11:NM_001202466:exon14:c.C1633T:p.R545W,ZMYND11:NM_006624:exon15:c.C1798T:p.R600W,ZMYND11:NM_001330057:exon16:c.C1747T:p.R583W	.	.	.	.	.	.	.	.	.	.	.	.	.	.	.	.	.	.	.	rs797044854	.	.	Pathogenic|Pathogenic	Inborn_genetic_diseases|not_provided	RCV000190655.1|RCV000358614.1	MeSH:MedGen|MedGen
10771	10p15.3	10	298399	298399	C	T	C>T	ZMYND11	exonic	nonsynonymous SNV	DDD4K.01615	DDD_2017	28135719	4293	0	exome	Developmental Delay (DD)	psychiatric disorder	validated	.	non-ssc	.	ZMYND11:NM_001202465:exon13:c.C1543T:p.R515W,ZMYND11:NM_001202464:exon14:c.C1636T:p.R546W,ZMYND11:NM_001202466:exon14:c.C1633T:p.R545W,ZMYND11:NM_006624:exon15:c.C1798T:p.R600W,ZMYND11:NM_001330057:exon16:c.C1747T:p.R583W	.	.	.	.	.	.	.	.	.	.	.	.	.	.	.	.	.	.	.	rs797044854	.	.	Pathogenic|Pathogenic	Inborn_genetic_diseases|not_provided	RCV000190655.1|RCV000358614.1	MeSH:MedGen|MedGen
221074	10p12.33	10	18242333	18242333	C	G	C>G	SLC39A12	exonic	nonsynonymous SNV	DDD4K.02235	DDD_2017	28135719	4293	0	exome	Developmental Delay (DD)	psychiatric disorder	validated	.	non-ssc	.	SLC39A12:NM_001145195:exon2:c.C128G:p.P43R,SLC39A12:NM_001282733:exon2:c.C128G:p.P43R,SLC39A12:NM_152725:exon2:c.C128G:p.P43R	.	.	.	.	.	.	.	.	.	.	.	.	.	.	.	.	.	.	.	.	.	.	.	.	.	.
10529	10p12.31	10	21147266	21147266	T	C	T>C	NEBL	exonic	nonsynonymous SNV	DDD4K.03947	DDD_2017	28135719	4293	0	exome	Developmental Delay (DD)	psychiatric disorder	validated	.	non-ssc	.	NEBL:NM_006393:exon9:c.A806G:p.Y269C	.	.	.	.	.	.	.	.	.	.	.	.	.	.	.	.	.	.	.	.	.	.	.	.	.	.
219681	10p12.2	10	23292328	23292328	C	A	C>A	ARMC3	exonic	nonsynonymous SNV	DDD4K.00023	DDD_2017	28135719	4293	0	exome	Developmental Delay (DD)	psychiatric disorder	validated	.	non-ssc	.	ARMC3:NM_001282747:exon10:c.C927A:p.F309L,ARMC3:NM_001282745:exon13:c.C1716A:p.F572L,ARMC3:NM_001282746:exon13:c.C1716A:p.F572L,ARMC3:NM_173081:exon13:c.C1716A:p.F572L	.	.	.	.	.	.	.	.	.	.	.	.	.	.	.	.	.	.	.	.	.	.	.	.	.	.
51322	10p12.1	10	28906677	28906677	G	C	G>C	WAC	exonic	nonsynonymous SNV	DDD4K.01763	DDD_2017	28135719	4293	0	exome	Developmental Delay (DD)	psychiatric disorder	validated	.	non-ssc	.	WAC:NM_100486:exon12:c.G1529C:p.R510P,WAC:NM_016628:exon13:c.G1838C:p.R613P,WAC:NM_100264:exon13:c.G1703C:p.R568P	.	.	.	.	.	.	.	.	.	.	.	.	.	.	.	.	.	.	.	.	.	.	.	.	.	.
3799	10p11.22	10	32344838	32344838	C	T	C>T	KIF5B	exonic	nonsynonymous SNV	DDD4K.00910	DDD_2017	28135719	4293	0	exome	Developmental Delay (DD)	psychiatric disorder	validated	.	non-ssc	.	KIF5B:NM_004521:exon1:c.G64A:p.E22K	.	.	.	.	.	.	.	.	.	.	.	.	.	.	.	.	.	.	.	.	.	.	.	.	.	.
8829	10p11.22	10	33475258	33475258	G	A	G>A	NRP1	exonic	nonsynonymous SNV	DDD4K.02801	DDD_2017	28135719	4293	0	exome	Developmental Delay (DD)	psychiatric disorder	validated	.	non-ssc	.	NRP1:NM_001244972:exon14:c.C2203T:p.R735C,NRP1:NM_001244973:exon14:c.C2200T:p.R734C,NRP1:NM_001330068:exon14:c.C2221T:p.R741C,NRP1:NM_003873:exon14:c.C2221T:p.R741C	.	.	.	.	.	.	.	.	.	.	.	.	.	.	.	.	.	.	.	.	.	.	.	.	.	.
83937	10q11.21	10	45488731	45488731	G	A	G>A	RASSF4	exonic	nonsynonymous SNV	DDD4K.02213	DDD_2017	28135719	4293	0	exome	Developmental Delay (DD)	psychiatric disorder	validated	.	non-ssc	.	RASSF4:NM_032023:exon11:c.G920A:p.R307H	0.0002	.	.	.	.	0.001	0.0002	0	0.0003	0	0	0	0	0.0011	.	.	.	.	.	rs545464349	.	.	.	.	.	.
9721	10q11.22	10	46999463	46999463	T	A	T>A	GPRIN2	exonic	nonsynonymous SNV	DDD4K.01851	DDD_2017	28135719	4293	0	exome	Developmental Delay (DD)	psychiatric disorder	validated	.	non-ssc	.	GPRIN2:NM_014696:exon3:c.T583A:p.S195T
57705	10q11.23	10	50105596	50105596	C	T	C>T	WDFY4	exonic	nonsynonymous SNV	DDD4K.02741	DDD_2017	28135719	4293	0	exome	Developmental Delay (DD)	psychiatric disorder	validated	.	non-ssc	.	WDFY4:NM_020945:exon45:c.C7414T:p.R2472W	.	.	.	.	.	.	.	.	.	.	.	.	.	.	.	.	.	.	.	.	.	.	.	.	.	.
219623	10q21.2	10	63173248	63173248	C	G	C>G	TMEM26	exonic	nonsynonymous SNV	DDD4K.00518	DDD_2017	28135719	4293	0	exome	Developmental Delay (DD)	psychiatric disorder	validated	.	non-ssc	.	TMEM26:NM_178505:exon5:c.G651C:p.W217C	.	.	.	.	.	.	.	.	.	.	.	.	.	.	.	.	.	.	.	.	.	.	.	.	.	.
219623	10q21.2	10	63173250	63173250	A	C	A>C	TMEM26	exonic	nonsynonymous SNV	DDD4K.03566	DDD_2017	28135719	4293	0	exome	Developmental Delay (DD)	psychiatric disorder	validated	.	non-ssc	.	TMEM26:NM_178505:exon5:c.T649G:p.W217G	.	.	.	.	.	.	.	.	.	.	.	.	.	.	.	.	.	.	.	.	.	.	.	.	.	.
22891	10q21.2	10	64136085	64136085	G	T	G>T	ZNF365	exonic	nonsynonymous SNV	DDD4K.00524	DDD_2017	28135719	4293	0	exome	Developmental Delay (DD)	psychiatric disorder	validated	.	non-ssc	.	ZNF365:NM_014951:exon2:c.G133T:p.A45S,ZNF365:NM_199450:exon2:c.G133T:p.A45S,ZNF365:NM_199451:exon2:c.G133T:p.A45S	.	.	.	.	.	.	.	.	.	.	.	.	.	.	.	.	.	.	.	.	.	.	.	.	.	.
23522	10q22.2	10	76789597	76789597	G	C	G>C	KAT6B	exonic	nonsynonymous SNV	DDD4K.00613	DDD_2017	28135719	4293	0	exome	Developmental Delay (DD)	psychiatric disorder	validated	.	non-ssc	.	KAT6B:NM_001256468:exon18:c.G4466C:p.S1489T,KAT6B:NM_001256469:exon18:c.G4139C:p.S1380T,KAT6B:NM_012330:exon18:c.G5015C:p.S1672T	.	.	.	.	.	.	.	.	.	.	.	.	.	.	.	.	.	.	.	.	.	.	.	.	.	.
23522	10q22.2	10	76789623	76789623	G	A	G>A	KAT6B	exonic	nonsynonymous SNV	DDD4K.00300	DDD_2017	28135719	4293	0	exome	Developmental Delay (DD)	psychiatric disorder	validated	.	non-ssc	.	KAT6B:NM_001256468:exon18:c.G4492A:p.E1498K,KAT6B:NM_001256469:exon18:c.G4165A:p.E1389K,KAT6B:NM_012330:exon18:c.G5041A:p.E1681K	.	.	.	.	.	.	.	.	.	.	.	.	.	.	.	.	.	.	.	.	COSM162773	1(breast);1(stomach)	.	.	.	.
9231	10q22.3	10	79576321	79576321	C	T	C>T	DLG5	exonic	nonsynonymous SNV	DDD4K.02022	DDD_2017	28135719	4293	0	exome	Developmental Delay (DD)	psychiatric disorder	validated	.	non-ssc	.	DLG5:NM_004747:exon20:c.G4013A:p.R1338Q	.	.	.	.	.	.	1.65e-05	0	0	0	0	1.5e-05	0	6.07e-05	0.0002	.	0.0003	.	.	rs149846107	.	.	.	.	.	.
2894	10q23.1	10	87487809	87487809	C	G	C>G	GRID1	exonic	nonsynonymous SNV	DDD4K.03840	DDD_2017	28135719	4293	0	exome	Developmental Delay (DD)	psychiatric disorder	validated	.	non-ssc	.	GRID1:NM_017551:exon10:c.G1336C:p.E446Q	.	.	.	.	.	.	.	.	.	.	.	.	.	.	.	.	.	.	.	.	.	.	.	.	.	.
2746	10q23.2	10	88817449	88817449	G	A	G>A	GLUD1	exonic	nonsynonymous SNV	DDD4K.03301	DDD_2017	28135719	4293	0	exome	Developmental Delay (DD)	psychiatric disorder	validated	.	non-ssc	.	GLUD1:NM_001318900:exon11:c.C1094T:p.S365L,GLUD1:NM_005271:exon11:c.C1493T:p.S498L,GLUD1:NM_001318904:exon12:c.C992T:p.S331L,GLUD1:NM_001318906:exon12:c.C992T:p.S331L,GLUD1:NM_001318902:exon13:c.C992T:p.S331L,GLUD1:NM_001318901:exon14:c.C992T:p.S331L,GLUD1:NM_001318905:exon14:c.C992T:p.S331L	.	.	.	.	.	.	.	.	.	.	.	.	.	.	.	.	.	.	.	rs121909731	.	.	Pathogenic|Pathogenic	Hyperinsulinism-hyperammonemia_syndrome|not_provided	RCV000017502.28|RCV000185923.2	MedGen:OMIM:Orphanet|MedGen
3832	10q23.33	10	94389961	94389961	A	G	A>G	KIF11	exonic	nonsynonymous SNV	DDD4K.02112	DDD_2017	28135719	4293	0	exome	Developmental Delay (DD)	psychiatric disorder	validated	.	non-ssc	.	KIF11:NM_004523:exon12:c.A1334G:p.N445S	.	.	.	.	.	.	.	.	.	.	.	.	.	.	.	.	.	.	.	.	.	.	.	.	.	.
1592	10q23.33	10	94834602	94834602	G	A	G>A	CYP26A1	exonic	nonsynonymous SNV	DDD4K.01934	DDD_2017	28135719	4293	0	exome	Developmental Delay (DD)	psychiatric disorder	validated	.	non-ssc	.	CYP26A1:NM_000783:exon3:c.G481A:p.G161S,CYP26A1:NM_057157:exon3:c.G274A:p.G92S	.	.	.	.	.	.	.	.	.	.	.	.	.	.	.	.	.	.	.	.	.	.	.	.	.	.
64318	10q23.33	10	96099617	96099617	C	T	C>T	NOC3L	exonic	nonsynonymous SNV	DDD4K.00900	DDD_2017	28135719	4293	0	exome	Developmental Delay (DD)	psychiatric disorder	validated	.	non-ssc	.	NOC3L:NM_022451:exon17:c.G1841A:p.R614H	0.0002	.	.	.	0.001	.	3.3e-05	0.0002	0	0	0	3e-05	0	0	0.0001	.	0.0001	.	.	rs149958947	COSM71860	1(ovary);1(endometrium)	.	.	.	.
26123	10q24.1	10	97442905	97442905	T	A	T>A	TCTN3	exonic	nonsynonymous SNV	DDD4K.01671	DDD_2017	28135719	4293	0	exome	Developmental Delay (DD)	psychiatric disorder	validated	.	non-ssc	.	TCTN3:NM_001143973:exon7:c.A807T:p.R269S,TCTN3:NM_015631:exon11:c.A1251T:p.R417S	.	.	.	.	.	.	.	.	.	.	.	.	.	.	.	.	.	.	.	.	.	.	.	.	.	.
93377	10q24.1	10	98109538	98109538	C	A	C>A	OPALIN	exonic	nonsynonymous SNV	DDD4K.00213	DDD_2017	28135719	4293	0	exome	Developmental Delay (DD)	psychiatric disorder	validated	.	non-ssc	.	OPALIN:NM_001040102:exon2:c.G49T:p.V17L,OPALIN:NM_001284320:exon3:c.G85T:p.V29L,OPALIN:NM_001284321:exon3:c.G82T:p.V28L,OPALIN:NM_033207:exon4:c.G118T:p.V40L,OPALIN:NM_001040103:exon5:c.G88T:p.V30L,OPALIN:NM_001284322:exon5:c.G88T:p.V30L,OPALIN:NM_001284323:exon5:c.G88T:p.V30L,OPALIN:NM_001284324:exon5:c.G88T:p.V30L	.	.	.	.	.	.	.	.	.	.	.	.	.	.	.	.	.	.	.	.	.	.	.	.	.	.
84986	10q24.1	10	99052336	99052336	C	G	C>G	ARHGAP19	exonic	nonsynonymous SNV	DDD4K.00037	DDD_2017	28135719	4293	0	exome	Developmental Delay (DD)	psychiatric disorder	validated	.	non-ssc	.	ARHGAP19:NM_001204300:exon1:c.G49C:p.G17R,ARHGAP19:NM_032900:exon1:c.G49C:p.G17R	.	.	.	.	.	.	8.26e-06	0	0	0	0	1.5e-05	0	0	0.0001	.	0.0001	.	.	rs370213712	.	.	.	.	.	.
84171	10q24.2	10	100011447	100011447	C	T	C>T	LOXL4	exonic	nonsynonymous SNV	DDD4K.00490	DDD_2017	28135719	4293	0	exome	Developmental Delay (DD)	psychiatric disorder	validated	.	non-ssc	.	LOXL4:NM_032211:exon13:c.G1964A:p.R655H	.	.	.	.	.	.	1.65e-05	0	0	0.0001	0	1.5e-05	0	0	.	.	.	.	.	rs754084906	.	.	.	.	.	.
55719	10q24.31	10	102689121	102689121	G	A	G>A	SLF2	exonic	nonsynonymous SNV	DDD4K.00143	DDD_2017	28135719	4293	0	exome	Developmental Delay (DD)	psychiatric disorder	validated	.	non-ssc	.	SLF2:NM_001136123:exon7:c.G2090A:p.R697Q,SLF2:NM_018121:exon7:c.G2090A:p.R697Q	.	.	.	.	.	.	.	.	.	.	.	.	.	.	.	.	.	.	.	.	.	.	.	.	.	.
9126	10q25.2	10	112363029	112363029	G	C	G>C	SMC3	exonic	nonsynonymous SNV	DDD4K.02223	DDD_2017	28135719	4293	0	exome	Developmental Delay (DD)	psychiatric disorder	validated	.	non-ssc	.	SMC3:NM_005445:exon28:c.G3563C:p.G1188A	.	.	.	.	.	.	.	.	.	.	.	.	.	.	.	.	.	.	.	.	.	.	.	.	.	.
6934	10q25.3	10	114903733	114903733	C	T	C>T	TCF7L2	exonic	nonsynonymous SNV	DDD4K.01449	DDD_2017	28135719	4293	0	exome	Developmental Delay (DD)	psychiatric disorder	validated	.	non-ssc	.	TCF7L2:NM_001349870:exon3:c.C308T:p.S103L,TCF7L2:NM_001349871:exon3:c.C188T:p.S63L,TCF7L2:NM_001198530:exon5:c.C566T:p.S189L,TCF7L2:NM_001146284:exon6:c.C668T:p.S223L,TCF7L2:NM_001146285:exon6:c.C668T:p.S223L,TCF7L2:NM_001146286:exon6:c.C668T:p.S223L,TCF7L2:NM_001198525:exon6:c.C668T:p.S223L,TCF7L2:NM_001198526:exon6:c.C668T:p.S223L,TCF7L2:NM_001198527:exon6:c.C668T:p.S223L,TCF7L2:NM_001198528:ex…	.	.	.	.	.	.	.	.	.	.	.	.	.	.	.	.	.	.	.	.	COSM5359905;COSM5359903;COSM5359906;COSM5359904	1(large_intestine)	.	.	.	.
840	10q25.3	10	115486111	115486111	G	A	G>A	CASP7	exonic	nonsynonymous SNV	DDD4K.00417	DDD_2017	28135719	4293	0	exome	Developmental Delay (DD)	psychiatric disorder	validated	.	non-ssc	.	CASP7:NM_033340:exon7:c.G566A:p.G189D	.	.	.	.	.	.	.	.	.	.	.	.	.	.	.	.	.	.	.	.	.	.	.	.	.	.
56165	10q25.3	10	115964592	115964592	G	A	G>A	TDRD1	exonic	nonsynonymous SNV	DDD4K.01233	DDD_2017	28135719	4293	0	exome	Developmental Delay (DD)	psychiatric disorder	validated	.	non-ssc	.	TDRD1:NM_198795:exon10:c.G1237A:p.V413I	.	.	.	.	.	.	.	.	.	.	.	.	.	.	.	.	.	.	.	.	.	.	.	.	.	.
340706	10q25.3	10	116037780	116037780	C	T	C>T	VWA2	exonic	nonsynonymous SNV	DDD4K.03363	DDD_2017	28135719	4293	0	exome	Developmental Delay (DD)	psychiatric disorder	validated	.	non-ssc	.	VWA2:NM_001272046:exon7:c.C674T:p.S225L,VWA2:NM_001320804:exon7:c.C674T:p.S225L	.	.	.	.	.	.	6.75e-05	0	0.0003	0	0.0002	6.12e-05	0	0	.	.	.	.	.	rs765307706	COSM4396077;COSM4396078	1(skin)	.	.	.	.
2263	10q26.13	10	123260357	123260357	G	A	G>A	FGFR2	exonic	nonsynonymous SNV	DDD4K.00747	DDD_2017	28135719	4293	0	exome	Developmental Delay (DD)	psychiatric disorder	validated	.	non-ssc	.	FGFR2:NM_001144914:exon8:c.C1208T:p.A403V,FGFR2:NM_001144916:exon8:c.C1199T:p.A400V,FGFR2:NM_001144917:exon9:c.C1196T:p.A399V,FGFR2:NM_001144918:exon9:c.C1193T:p.A398V,FGFR2:NM_023029:exon9:c.C1277T:p.A426V,FGFR2:NM_001144913:exon10:c.C1547T:p.A516V,FGFR2:NM_001144915:exon10:c.C1277T:p.A426V,FGFR2:NM_001144919:exon10:c.C1280T:p.A427V,FGFR2:NM_001320654:exon10:c.C860T:p.A287V,FGFR2:NM_000141:exon1…	.	.	.	.	.	.	.	.	.	.	.	.	.	.	.	.	.	.	.	.	.	.	.	.	.	.
54764	10q26.13	10	126662852	126662852	C	T	C>T	ZRANB1	exonic	nonsynonymous SNV	DDD4K.01928	DDD_2017	28135719	4293	0	exome	Developmental Delay (DD)	psychiatric disorder	validated	.	non-ssc	.	ZRANB1:NM_017580:exon5:c.C1312T:p.R438W	.	.	.	.	.	.	.	.	.	.	.	.	.	.	.	.	.	.	.	.	.	.	.	.	.	.
54764	10q26.13	10	126662892	126662892	C	T	C>T	ZRANB1	exonic	nonsynonymous SNV	DDD4K.03942	DDD_2017	28135719	4293	0	exome	Developmental Delay (DD)	psychiatric disorder	validated	.	non-ssc	.	ZRANB1:NM_017580:exon5:c.C1352T:p.A451V	.	.	.	.	.	.	.	.	.	.	.	.	.	.	.	.	.	.	.	.	.	.	.	.	.	.
55760	10q26.2	10	127527592	127527592	A	G	A>G	DHX32	exonic	nonsynonymous SNV	DDD4K.02490	DDD_2017	28135719	4293	0	exome	Developmental Delay (DD)	psychiatric disorder	validated	.	non-ssc	.	DHX32:NM_018180:exon9:c.T1859C:p.L620P	.	.	.	.	.	.	.	.	.	.	.	.	.	.	.	.	.	.	.	.	.	.	.	.	.	.
253738	10q26.3	10	131676089	131676089	C	A	C>A	EBF3	exonic	nonsynonymous SNV	DDD4K.01554	DDD_2017	28135719	4293	0	exome	Developmental Delay (DD)	psychiatric disorder	validated	.	non-ssc	.	EBF3:NM_001005463:exon7:c.G579T:p.K193N	.	.	.	.	.	.	.	.	.	.	.	.	.	.	.	.	.	.	.	.	.	.	Pathogenic	HYPOTONIA\x2c_ATAXIA\x2c_AND_DELAYED_DEVELOPMENT_SYNDROME	RCV000416948.1	MedGen:OMIM
253738	10q26.3	10	131755546	131755546	G	A	G>A	EBF3	exonic	nonsynonymous SNV	DDD4K.02459	DDD_2017	28135719	4293	0	exome	Developmental Delay (DD)	psychiatric disorder	validated	.	non-ssc	.	EBF3:NM_001005463:exon6:c.C530T:p.P177L	.	.	.	.	.	.	.	.	.	.	.	.	.	.	.	.	.	.	.	rs869312668	.	.	Pathogenic|Pathogenic|Pathogenic|Pathogenic|Pathogenic	Ataxia|Delayed_speech_and_language_development|Intellectual_disability_(moderate)|Muscular_hypotonia|HYPOTONIA\x2c_ATAXIA\x2c_AND_DELAYED_DEVELOPMENT_SYNDROME	RCV000209868.2|RCV000209868.2|RCV000209868.2|RCV000209868.2|RCV000416981.1	Human_Phenotype_Ontology:MedGen|Human_Phenotype_Ontology:MedGen|MedGen|Human_Phenotype_Ontology:MedGen|MedGen:OMIM
196743	10q26.3	10	135202549	135202549	C	G	C>G	PAOX	exonic	nonsynonymous SNV	DDD4K.01129	DDD_2017	28135719	4293	0	exome	Developmental Delay (DD)	psychiatric disorder	validated	.	non-ssc	.	PAOX:NM_207127:exon4:c.C958G:p.P320A,PAOX:NM_152911:exon5:c.C1211G:p.T404S,PAOX:NM_207128:exon5:c.C1211G:p.T404S	.	.	.	.	.	.	.	.	.	.	.	.	.	.	.	.	.	.	.	.	.	.	.	.	.	.
387733	11p15.5	11	298632	298632	C	T	C>T	IFITM5	exonic	nonsynonymous SNV	DDD4K.04124	DDD_2017	28135719	4293	0	exome	Developmental Delay (DD)	psychiatric disorder	validated	.	non-ssc	.	IFITM5:NM_001025295:exon2:c.G268A:p.A90T	.	.	.	.	.	.	4.2e-05	0	0	0.0002	0	4.6e-05	0	0	.	.	.	.	.	rs747064580	COSM4188033	1(kidney)	.	.	.	.
338707	11p15.5	11	379895	379895	T	C	T>C	B4GALNT4	exonic	nonsynonymous SNV	DDD4K.01904	DDD_2017	28135719	4293	0	exome	Developmental Delay (DD)	psychiatric disorder	validated	.	non-ssc	.	B4GALNT4:NM_178537:exon16:c.T2518C:p.F840L	.	.	.	.	.	.	.	.	.	.	.	.	.	.	.	.	.	.	.	.	.	.	.	.	.	.
6050	11p15.5	11	500520	500520	C	A	C>A	RNH1	exonic	nonsynonymous SNV	DDD4K.01858	DDD_2017	28135719	4293	0	exome	Developmental Delay (DD)	psychiatric disorder	validated	.	non-ssc	.	RNH1:NM_203384:exon3:c.G236T:p.G79V,RNH1:NM_203385:exon3:c.G236T:p.G79V,RNH1:NM_203388:exon3:c.G236T:p.G79V,RNH1:NM_203389:exon3:c.G236T:p.G79V,RNH1:NM_002939:exon4:c.G236T:p.G79V,RNH1:NM_203383:exon4:c.G236T:p.G79V,RNH1:NM_203386:exon4:c.G236T:p.G79V,RNH1:NM_203387:exon4:c.G236T:p.G79V	.	.	.	.	.	.	.	.	.	.	.	.	.	.	.	.	.	.	.	.	.	.	.	.	.	.
10522	11p15.5	11	686871	686871	T	C	T>C	DEAF1	exonic	nonsynonymous SNV	DDD4K.03128	DDD_2017	28135719	4293	0	exome	Developmental Delay (DD)	psychiatric disorder	validated	.	non-ssc	.	DEAF1:NM_021008:exon5:c.A791G:p.Q264R	.	.	.	.	.	.	.	.	.	.	.	.	.	.	.	.	.	.	.	.	.	.	Pathogenic	Mental_retardation\x2c_autosomal_dominant_24	RCV000119805.4	MedGen:OMIM
283229	11p15.5	11	831273	831273	C	G	C>G	CRACR2B	exonic	nonsynonymous SNV	DDD4K.00210	DDD_2017	28135719	4293	0	exome	Developmental Delay (DD)	psychiatric disorder	validated	.	non-ssc	.	CRACR2B:NM_173584:exon7:c.C836G:p.A279G,CRACR2B:NM_001286606:exon8:c.C1003G:p.L335V	.	.	.	.	.	.	.	.	.	.	.	.	.	.	.	.	.	.	.	.	.	.	.	.	.	.
29850	11p15.5	11	2433381	2433381	C	T	C>T	TRPM5	exonic	nonsynonymous SNV	DDD4K.01813	DDD_2017	28135719	4293	0	exome	Developmental Delay (DD)	psychiatric disorder	validated	.	non-ssc	.	TRPM5:NM_014555:exon16:c.G2458A:p.V820M	.	.	.	.	.	.	1.66e-05	0	0	0.0001	0	1.51e-05	0	0	.	.	.	.	.	rs780650279	.	.	.	.	.	.
57053	11p15.4	11	3687683	3687683	G	C	G>C	CHRNA10	exonic	nonsynonymous SNV	DDD4K.00068	DDD_2017	28135719	4293	0	exome	Developmental Delay (DD)	psychiatric disorder	validated	.	non-ssc	.	CHRNA10:NM_001303034:exon5:c.C389G:p.A130G,CHRNA10:NM_001303035:exon5:c.C389G:p.A130G,CHRNA10:NM_020402:exon5:c.C1007G:p.A336G	.	.	.	.	.	.	.	.	.	.	.	.	.	.	.	.	.	.	.	.	.	.	.	.	.	.
117854;445372	11p15.4	11	5626751	5626751	C	T	C>T	TRIM6;TRIM6-TRIM34	exonic	nonsynonymous SNV	DDD4K.02251	DDD_2017	28135719	4293	0	exome	Developmental Delay (DD)	psychiatric disorder	validated	.	non-ssc	.	TRIM6:NM_001198645:exon2:c.C179T:p.S60L,TRIM6:NM_001198644:exon3:c.C179T:p.S60L,TRIM6:NM_001003818:exon4:c.C788T:p.S263L,TRIM6-TRIM34:NM_001003819:exon4:c.C788T:p.S263L,TRIM6:NM_058166:exon4:c.C704T:p.S235L	.	.	.	.	.	.	8.26e-06	9.64e-05	0	0	0	0	0	0	0.0001	0.0002	.	.	.	rs376937201	.	.	.	.	.	.
85363	11p15.4	11	5686526	5686526	C	T	C>T	TRIM5	exonic	nonsynonymous SNV	DDD4K.03760	DDD_2017	28135719	4293	0	exome	Developmental Delay (DD)	psychiatric disorder	validated	.	non-ssc	.	TRIM5:NM_033034:exon8:c.G995A:p.R332Q	.	.	.	.	.	.	4.12e-05	0	0	0	0	7.5e-05	0	0	0.0001	.	0.0001	.	.	rs145938172	.	.	.	.	.	.
85363	11p15.4	11	5699591	5699591	T	A	T>A	TRIM5	exonic	nonsynonymous SNV	DDD4K.01933	DDD_2017	28135719	4293	0	exome	Developmental Delay (DD)	psychiatric disorder	validated	.	non-ssc	.	TRIM5:NM_033034:exon4:c.A587T:p.E196V,TRIM5:NM_033092:exon4:c.A587T:p.E196V,TRIM5:NM_033093:exon4:c.A587T:p.E196V	.	.	.	.	.	.	.	.	.	.	.	.	.	.	.	.	.	.	.	.	.	.	.	.	.	.
7762	11p15.4	11	6977626	6977626	G	A	G>A	ZNF215	exonic	nonsynonymous SNV	DDD4K.00929	DDD_2017	28135719	4293	0	exome	Developmental Delay (DD)	psychiatric disorder	validated	.	non-ssc	.	ZNF215:NM_013250:exon7:c.G1418A:p.R473Q	0.0002	0.0008	.	.	.	.	4.95e-05	0.0002	0	0.0001	0	4.5e-05	0	0	.	.	.	.	.	rs200066448	.	.	.	.	.	.
338322	11p15.4	11	7981809	7981809	G	T	G>T	NLRP10	exonic	nonsynonymous SNV	DDD4K.02564	DDD_2017	28135719	4293	0	exome	Developmental Delay (DD)	psychiatric disorder	validated	.	non-ssc	.	NLRP10:NM_176821:exon2:c.C1350A:p.N450K	.	.	.	.	.	.	.	.	.	.	.	.	.	.	.	.	.	.	.	.	.	.	.	.	.	.
7465	11p15.4	11	9603110	9603110	C	G	C>G	WEE1	exonic	nonsynonymous SNV	DDD4K.04156	DDD_2017	28135719	4293	0	exome	Developmental Delay (DD)	psychiatric disorder	validated	.	non-ssc	.	WEE1:NM_001143976:exon6:c.C531G:p.N177K,WEE1:NM_003390:exon6:c.C1173G:p.N391K	.	.	.	.	.	.	.	.	.	.	.	.	.	.	.	.	.	.	.	.	.	.	.	.	.	.
81846	11p15.4	11	9983525	9983525	C	A	C>A	SBF2	exonic	nonsynonymous SNV	DDD4K.04175	DDD_2017	28135719	4293	0	exome	Developmental Delay (DD)	psychiatric disorder	validated	.	non-ssc	.	SBF2:NM_030962:exon16:c.G1839T:p.R613S	.	.	.	.	.	.	.	.	.	.	.	.	.	.	.	.	.	.	.	.	.	.	.	.	.	.
144100	11p15.1	11	16812640	16812640	G	C	G>C	PLEKHA7	exonic	nonsynonymous SNV	DDD4K.04114	DDD_2017	28135719	4293	0	exome	Developmental Delay (DD)	psychiatric disorder	validated	.	non-ssc	.	PLEKHA7:NM_001329630:exon20:c.C2852G:p.T951R,PLEKHA7:NM_001329631:exon20:c.C2855G:p.T952R,PLEKHA7:NM_175058:exon20:c.C2852G:p.T951R	.	.	.	.	.	.	.	.	.	.	.	.	.	.	.	.	.	.	.	.	.	.	.	.	.	.
3939	11p15.1	11	18428672	18428672	C	T	C>T	LDHA	exonic	nonsynonymous SNV	DDD4K.00052	DDD_2017	28135719	4293	0	exome	Developmental Delay (DD)	psychiatric disorder	validated	.	non-ssc	.	LDHA:NM_001165416:exon7:c.C719T:p.T240M	.	.	.	.	.	.	4.17e-05	0.0002	0	0	0	3.04e-05	0	6.08e-05	0.0001	.	0.0001	.	.	rs143206293	.	.	.	.	.	.
5080	11p13	11	31824316	31824316	C	T	C>T	PAX6	exonic	nonsynonymous SNV	DDD4K.01804	DDD_2017	28135719	4293	0	exome	Developmental Delay (DD)	psychiatric disorder	validated	.	non-ssc	.	PAX6:NM_001310159:exon3:c.G77A:p.R26Q,PAX6:NM_001258465:exon4:c.G77A:p.R26Q,PAX6:NM_000280:exon5:c.G77A:p.R26Q,PAX6:NM_001127612:exon5:c.G77A:p.R26Q,PAX6:NM_001258462:exon5:c.G77A:p.R26Q,PAX6:NM_001258463:exon5:c.G77A:p.R26Q,PAX6:NM_001258464:exon5:c.G77A:p.R26Q,PAX6:NM_001310158:exon5:c.G77A:p.R26Q,PAX6:NM_001604:exon5:c.G77A:p.R26Q	.	.	.	.	.	.	.	.	.	.	.	.	.	.	.	.	.	.	.	.	.	.	.	.	.	.
25758	11p13	11	33604922	33604922	G	A	G>A	KIAA1549L	exonic	nonsynonymous SNV	DDD4K.03677	DDD_2017	28135719	4293	0	exome	Developmental Delay (DD)	psychiatric disorder	validated	.	non-ssc	.	KIAA1549L:NM_012194:exon10:c.G3550A:p.A1184T	.	.	.	.	.	.	0	0	0	0	0	0	0	0	.	.	.	.	.	rs754838512	COSM2115210;COSM2115209	1(stomach);1(large_intestine)	.	.	.	.
1408	11p11.2	11	45877604	45877604	G	A	G>A	CRY2	exonic	nonsynonymous SNV	DDD4K.01398	DDD_2017	28135719	4293	0	exome	Developmental Delay (DD)	psychiatric disorder	validated	.	non-ssc	.	CRY2:NM_001127457:exon2:c.G104A:p.R35Q,CRY2:NM_021117:exon2:c.G350A:p.R117Q	0.0002	.	.	.	.	0.001	3.3e-05	0	0	0.0001	0	3e-05	0	6.06e-05	0.0001	.	0.0001	.	.	rs144480697	.	.	.	.	.	.
1132	11p11.2	11	46407071	46407071	G	A	G>A	CHRM4	exonic	nonsynonymous SNV	DDD4K.01651	DDD_2017	28135719	4293	0	exome	Developmental Delay (DD)	psychiatric disorder	validated	.	non-ssc	.	CHRM4:NM_000741:exon1:c.C1037T:p.T346M	0.0004	0.0015	.	.	.	.	7.92e-05	0.0004	0.0002	0	0	4.64e-05	0	0	0.0003	0.0009	.	.	.	rs191392166	.	.	.	.	.	.
2147	11p11.2	11	46751081	46751081	A	G	A>G	F2	exonic	nonsynonymous SNV	DDD4K.02864	DDD_2017	28135719	4293	0	exome	Developmental Delay (DD)	psychiatric disorder	validated	.	non-ssc	.	F2:NM_000506:exon12:c.A1624G:p.I542V,F2:NM_001311257:exon12:c.A1576G:p.I526V	.	.	.	.	.	.	.	.	.	.	.	.	.	.	.	.	.	.	.	.	.	.	.	.	.	.
4038	11p11.2	11	46905455	46905455	C	A	C>A	LRP4	exonic	nonsynonymous SNV	DDD4K.01028	DDD_2017	28135719	4293	0	exome	Developmental Delay (DD)	psychiatric disorder	validated	.	non-ssc	.	LRP4:NM_002334:exon19:c.G2579T:p.R860L	.	.	.	.	.	.	.	.	.	.	.	.	.	.	.	.	.	.	.	.	.	.	.	.	.	.
4038	11p11.2	11	46907937	46907937	T	C	T>C	LRP4	exonic	nonsynonymous SNV	DDD4K.03860	DDD_2017	28135719	4293	0	exome	Developmental Delay (DD)	psychiatric disorder	validated	.	non-ssc	.	LRP4:NM_002334:exon17:c.A2363G:p.Y788C	.	.	.	.	.	.	.	.	.	.	.	.	.	.	.	.	.	.	.	.	.	.	.	.	.	.
8567	11p11.2	11	47296185	47296185	A	G	A>G	MADD	exonic	nonsynonymous SNV	DDD4K.04187	DDD_2017	28135719	4293	0	exome	Developmental Delay (DD)	psychiatric disorder	validated	.	non-ssc	.	MADD:NM_001135943:exon3:c.A134G:p.E45G,MADD:NM_001135944:exon3:c.A134G:p.E45G,MADD:NM_003682:exon3:c.A134G:p.E45G,MADD:NM_130470:exon3:c.A134G:p.E45G,MADD:NM_130471:exon3:c.A134G:p.E45G,MADD:NM_130472:exon3:c.A134G:p.E45G,MADD:NM_130473:exon3:c.A134G:p.E45G,MADD:NM_130474:exon3:c.A134G:p.E45G,MADD:NM_130475:exon3:c.A134G:p.E45G,MADD:NM_130476:exon3:c.A134G:p.E45G	.	.	.	.	.	.	.	.	.	.	.	.	.	.	.	.	.	.	.	.	.	.	.	.	.	.
8567	11p11.2	11	47317523	47317523	G	A	G>A	MADD	exonic	nonsynonymous SNV	DDD4K.03000	DDD_2017	28135719	4293	0	exome	Developmental Delay (DD)	psychiatric disorder	validated	.	non-ssc	.	MADD:NM_001135943:exon22:c.G3430A:p.E1144K,MADD:NM_001135944:exon22:c.G3421A:p.E1141K,MADD:NM_130470:exon22:c.G3562A:p.E1188K,MADD:NM_130472:exon22:c.G3433A:p.E1145K,MADD:NM_130474:exon22:c.G3433A:p.E1145K,MADD:NM_130476:exon22:c.G3559A:p.E1187K,MADD:NM_130471:exon23:c.G3493A:p.E1165K,MADD:NM_130473:exon23:c.G3622A:p.E1208K,MADD:NM_003682:exon24:c.G3676A:p.E1226K,MADD:NM_130475:exon24:c.G3676A:p.…	.	.	.	.	.	.	.	.	.	.	.	.	.	.	.	.	.	.	.	rs759601036	COSM4699829	1(large_intestine)	.	.	.	.
119764	11p11.2	11	48267008	48267008	T	C	T>C	OR4X2	exonic	nonsynonymous SNV	DDD4K.00440	DDD_2017	28135719	4293	0	exome	Developmental Delay (DD)	psychiatric disorder	validated	.	non-ssc	.	OR4X2:NM_001004727:exon1:c.T353C:p.I118T	.	.	.	.	.	.	.	.	.	.	.	.	.	.	.	.	.	.	.	.	.	.	.	.	.	.
338674	11q12.1	11	55761693	55761693	A	G	A>G	OR5F1	exonic	nonsynonymous SNV	DDD4K.01825	DDD_2017	28135719	4293	0	exome	Developmental Delay (DD)	psychiatric disorder	validated	.	non-ssc	.	OR5F1:NM_003697:exon1:c.T409C:p.S137P	.	.	.	.	.	.	.	.	.	.	.	.	.	.	.	.	.	.	.	.	.	.	.	.	.	.
390168	11q12.1	11	56380662	56380662	G	A	G>A	OR5M1	exonic	nonsynonymous SNV	DDD4K.02480	DDD_2017	28135719	4293	0	exome	Developmental Delay (DD)	psychiatric disorder	validated	.	non-ssc	.	OR5M1:NM_001004740:exon1:c.C317T:p.A106V	.	.	.	.	.	.	8.29e-06	0	0	0	0	1.5e-05	0	0	.	.	.	.	.	rs766988957	.	.	.	.	.	.
349667	11q12.1	11	57235295	57235295	C	T	C>T	RTN4RL2	exonic	nonsynonymous SNV	DDD4K.02871	DDD_2017	28135719	4293	0	exome	Developmental Delay (DD)	psychiatric disorder	validated	.	non-ssc	.	RTN4RL2:NM_178570:exon2:c.C245T:p.S82F	.	.	.	.	.	.	.	.	.	.	.	.	.	.	.	.	.	.	.	.	.	.	.	.	.	.
219960	11q12.1	11	57995647	57995647	C	G	C>G	OR10Q1	exonic	nonsynonymous SNV	DDD4K.00698	DDD_2017	28135719	4293	0	exome	Developmental Delay (DD)	psychiatric disorder	validated	.	non-ssc	.	OR10Q1:NM_001004471:exon1:c.G701C:p.R234P	.	.	.	.	.	.	8.25e-06	0	0	0	0	1.5e-05	0	0	.	.	.	.	.	rs747093517	.	.	.	.	.	.
64852	11q12.3	11	62342786	62342786	C	T	C>T	TUT1	exonic	nonsynonymous SNV	DDD4K.03300	DDD_2017	28135719	4293	0	exome	Developmental Delay (DD)	psychiatric disorder	validated	.	non-ssc	.	TUT1:NM_022830:exon9:c.G2519A:p.G840E	.	.	.	.	.	.	.	.	.	.	.	.	.	.	.	.	.	.	.	.	COSM4738433;COSM4738434	1(large_intestine)	.	.	.	.
6520	11q12.3	11	62652812	62652812	C	T	C>T	SLC3A2	exonic	nonsynonymous SNV	DDD4K.02220	DDD_2017	28135719	4293	0	exome	Developmental Delay (DD)	psychiatric disorder	validated	.	non-ssc	.	SLC3A2:NM_001013251:exon6:c.C982T:p.R328C,SLC3A2:NM_001012664:exon7:c.C1099T:p.R367C,SLC3A2:NM_001012662:exon9:c.C1288T:p.R430C,SLC3A2:NM_002394:exon9:c.C1285T:p.R429C	.	.	.	.	.	.	.	.	.	.	.	.	.	.	.	.	.	.	.	.	.	.	.	.	.	.
9379	11q13.1	11	64428503	64428503	C	T	C>T	NRXN2	exonic	nonsynonymous SNV	DDD4K.02618	DDD_2017	28135719	4293	0	exome	Developmental Delay (DD)	psychiatric disorder	validated	.	non-ssc	.	NRXN2:NM_138732:exon9:c.G1814A:p.R605Q,NRXN2:NM_015080:exon10:c.G1907A:p.R636Q	0.0002	.	.	0.001	.	.	2.54e-05	0	0	0.0001	0	0	0	0.0001	.	.	.	.	.	rs573064828	COSM3729521	1(stomach)	.	.	.	.
7536	11q13.1	11	64536806	64536806	C	A	C>A	SF1	exonic	nonsynonymous SNV	DDD4K.02895	DDD_2017	28135719	4293	0	exome	Developmental Delay (DD)	psychiatric disorder	validated	.	non-ssc	.	SF1:NM_001346409:exon6:c.G323T:p.R108I,SF1:NM_001346410:exon6:c.G323T:p.R108I,SF1:NM_001178030:exon7:c.G1043T:p.R348I,SF1:NM_001178031:exon7:c.G590T:p.R197I,SF1:NM_001346363:exon7:c.G668T:p.R223I,SF1:NM_001346364:exon7:c.G668T:p.R223I,SF1:NM_004630:exon7:c.G668T:p.R223I,SF1:NM_201995:exon7:c.G668T:p.R223I,SF1:NM_201997:exon7:c.G668T:p.R223I,SF1:NM_201998:exon7:c.G668T:p.R223I	.	.	.	.	.	.	.	.	.	.	.	.	.	.	.	.	.	.	.	.	.	.	.	.	.	.
55690	11q13.2	11	65978677	65978677	C	T	C>T	PACS1	exonic	nonsynonymous SNV	DDD4K.03626	DDD_2017	28135719	4293	0	exome	Developmental Delay (DD)	psychiatric disorder	validated	.	non-ssc	.	PACS1:NM_018026:exon4:c.C607T:p.R203W	.	.	.	.	.	.	8.24e-06	0	0	0.0001	0	0	0	0	.	.	.	.	.	rs398123009	COSM72051	1(ovary);1(breast)	other|Pathogenic|Pathogenic|Pathogenic	Schuurs-hoeijmakers_syndrome|Multiple_congenital_anomalies|Inborn_genetic_diseases|not_provided	RCV000032781.5|RCV000190758.1|RCV000210719.1|RCV000429725.1	MedGen:OMIM:Orphanet|MedGen:SNOMED_CT:SNOMED_CT|MeSH:MedGen|MedGen
55690	11q13.2	11	65978677	65978677	C	T	C>T	PACS1	exonic	nonsynonymous SNV	DDD4K.02487	DDD_2017	28135719	4293	0	exome	Developmental Delay (DD)	psychiatric disorder	validated	.	non-ssc	.	PACS1:NM_018026:exon4:c.C607T:p.R203W	.	.	.	.	.	.	8.24e-06	0	0	0.0001	0	0	0	0	.	.	.	.	.	rs398123009	COSM72051	1(ovary);1(breast)	other|Pathogenic|Pathogenic|Pathogenic	Schuurs-hoeijmakers_syndrome|Multiple_congenital_anomalies|Inborn_genetic_diseases|not_provided	RCV000032781.5|RCV000190758.1|RCV000210719.1|RCV000429725.1	MedGen:OMIM:Orphanet|MedGen:SNOMED_CT:SNOMED_CT|MeSH:MedGen|MedGen
55690	11q13.2	11	65978677	65978677	C	T	C>T	PACS1	exonic	nonsynonymous SNV	DDD4K.03590	DDD_2017	28135719	4293	0	exome	Developmental Delay (DD)	psychiatric disorder	validated	.	non-ssc	.	PACS1:NM_018026:exon4:c.C607T:p.R203W	.	.	.	.	.	.	8.24e-06	0	0	0.0001	0	0	0	0	.	.	.	.	.	rs398123009	COSM72051	1(ovary);1(breast)	other|Pathogenic|Pathogenic|Pathogenic	Schuurs-hoeijmakers_syndrome|Multiple_congenital_anomalies|Inborn_genetic_diseases|not_provided	RCV000032781.5|RCV000190758.1|RCV000210719.1|RCV000429725.1	MedGen:OMIM:Orphanet|MedGen:SNOMED_CT:SNOMED_CT|MeSH:MedGen|MedGen
55690	11q13.2	11	65978677	65978677	C	T	C>T	PACS1	exonic	nonsynonymous SNV	DDD4K.04030	DDD_2017	28135719	4293	0	exome	Developmental Delay (DD)	psychiatric disorder	validated	.	non-ssc	.	PACS1:NM_018026:exon4:c.C607T:p.R203W	.	.	.	.	.	.	8.24e-06	0	0	0.0001	0	0	0	0	.	.	.	.	.	rs398123009	COSM72051	1(ovary);1(breast)	other|Pathogenic|Pathogenic|Pathogenic	Schuurs-hoeijmakers_syndrome|Multiple_congenital_anomalies|Inborn_genetic_diseases|not_provided	RCV000032781.5|RCV000190758.1|RCV000210719.1|RCV000429725.1	MedGen:OMIM:Orphanet|MedGen:SNOMED_CT:SNOMED_CT|MeSH:MedGen|MedGen
51773	11q14.1	11	77412638	77412638	T	C	T>C	RSF1	exonic	nonsynonymous SNV	DDD4K.03705	DDD_2017	28135719	4293	0	exome	Developmental Delay (DD)	psychiatric disorder	validated	.	non-ssc	.	RSF1:NM_016578:exon6:c.A1636G:p.M546V	.	.	.	.	.	.	.	.	.	.	.	.	.	.	.	.	.	.	.	.	.	.	.	.	.	.
220388	11q14.1	11	85397173	85397173	T	A	T>A	CCDC89	exonic	nonsynonymous SNV	DDD4K.00420	DDD_2017	28135719	4293	0	exome	Developmental Delay (DD)	psychiatric disorder	validated	.	non-ssc	.	CCDC89:NM_152723:exon1:c.A1T:p.M1L	.	.	.	.	.	.	.	.	.	.	.	.	.	.	.	.	.	.	.	.	.	.	.	.	.	.
8726	11q14.2	11	85989470	85989470	G	C	G>C	EED	exonic	nonsynonymous SNV	DDD4K.00021	DDD_2017	28135719	4293	0	exome	Developmental Delay (DD)	psychiatric disorder	validated	.	non-ssc	.	EED:NM_001330334:exon10:c.G989C:p.G330A,EED:NM_003797:exon12:c.G1229C:p.G410A,EED:NM_001308007:exon13:c.G1304C:p.G435A	0.0002	.	0.0014	.	.	.	8.25e-06	0	8.68e-05	0	0	0	0	0	.	.	.	.	.	rs199562674	.	.	.	.	.	.
53942	11q22.1	11	100211348	100211348	A	G	A>G	CNTN5	exonic	nonsynonymous SNV	DDD4K.03810	DDD_2017	28135719	4293	0	exome	Developmental Delay (DD)	psychiatric disorder	validated	.	non-ssc	.	CNTN5:NM_175566:exon19:c.A2662G:p.S888G,CNTN5:NM_001243270:exon21:c.A2884G:p.S962G,CNTN5:NM_014361:exon22:c.A2884G:p.S962G	.	.	.	.	.	.	.	.	.	.	.	.	.	.	.	.	.	.	.	.	COSM3358973;COSM3358972	1(kidney)	.	.	.	.
472	11q22.3	11	108124581	108124581	G	A	G>A	ATM	exonic	nonsynonymous SNV	DDD4K.02455	DDD_2017	28135719	4293	0	exome	Developmental Delay (DD)	psychiatric disorder	validated	.	non-ssc	.	ATM:NM_000051:exon13:c.G1939A:p.E647K	.	.	.	.	.	.	.	.	.	.	.	.	.	.	.	.	.	.	.	.	.	.	.	.	.	.
57569	11q23.1	11	110450999	110450999	A	C	A>C	ARHGAP20	exonic	nonsynonymous SNV	DDD4K.01412	DDD_2017	28135719	4293	0	exome	Developmental Delay (DD)	psychiatric disorder	validated	.	non-ssc	.	ARHGAP20:NM_001258415:exon15:c.T2602G:p.L868V,ARHGAP20:NM_001258417:exon15:c.T2563G:p.L855V,ARHGAP20:NM_001258418:exon15:c.T2563G:p.L855V,ARHGAP20:NM_001258416:exon16:c.T2593G:p.L865V,ARHGAP20:NM_020809:exon16:c.T2671G:p.L891V	.	.	.	.	.	.	.	.	.	.	.	.	.	.	.	.	.	.	.	.	.	.	.	.	.	.
1813	11q23.2	11	113295222	113295222	C	T	C>T	DRD2	exonic	nonsynonymous SNV	DDD4K.00095	DDD_2017	28135719	4293	0	exome	Developmental Delay (DD)	psychiatric disorder	validated	.	non-ssc	.	DRD2:NM_000795:exon2:c.G152A:p.G51D,DRD2:NM_016574:exon2:c.G152A:p.G51D	.	.	.	.	.	.	.	.	.	.	.	.	.	.	.	.	.	.	.	.	.	.	.	.	.	.
79102	11q23.3	11	119206698	119206698	G	A	G>A	RNF26	exonic	nonsynonymous SNV	DDD4K.00192	DDD_2017	28135719	4293	0	exome	Developmental Delay (DD)	psychiatric disorder	validated	.	non-ssc	.	RNF26:NM_032015:exon1:c.G866A:p.R289Q	.	.	.	.	.	.	1.66e-05	0.0002	0	0	0	0	0	0	0.0002	0.0005	.	.	.	rs137974898	.	.	.	.	.	.
7007	11q23.3	11	120989333	120989333	G	A	G>A	TECTA	exonic	nonsynonymous SNV	DDD4K.01460	DDD_2017	28135719	4293	0	exome	Developmental Delay (DD)	psychiatric disorder	validated	.	non-ssc	.	TECTA:NM_005422:exon6:c.G1109A:p.R370H	.	.	.	.	.	.	1.65e-05	0	0	0	0	1.5e-05	0	6.06e-05	.	.	.	.	.	rs766240536	COSM4984160	1(oesophagus)	.	.	.	.
6653	11q24.1	11	121454256	121454256	T	C	T>C	SORL1	exonic	nonsynonymous SNV	DDD4K.00276	DDD_2017	28135719	4293	0	exome	Developmental Delay (DD)	psychiatric disorder	validated	.	non-ssc	.	SORL1:NM_003105:exon26:c.T3670C:p.C1224R	.	.	.	.	.	.	.	.	.	.	.	.	.	.	.	.	.	.	.	.	.	.	.	.	.	.
390264	11q24.1	11	123886946	123886946	G	A	G>A	OR10G4	exonic	nonsynonymous SNV	DDD4K.01396	DDD_2017	28135719	4293	0	exome	Developmental Delay (DD)	psychiatric disorder	validated	.	non-ssc	.	OR10G4:NM_001004462:exon1:c.G665A:p.C222Y	.	.	.	.	.	.	.	.	.	.	.	.	.	.	.	.	.	.	.	.	.	.	.	.	.	.
84897	11q24.2	11	124494858	124494858	G	A	G>A	TBRG1	exonic	nonsynonymous SNV	DDD4K.00624	DDD_2017	28135719	4293	0	exome	Developmental Delay (DD)	psychiatric disorder	validated	.	non-ssc	.	TBRG1:NM_032811:exon2:c.G182A:p.R61H	.	.	.	.	.	.	0.0005	0	0	0	0	0.0003	0	0.001	.	.	.	.	.	rs777549339	COSM1152267	1(endometrium)	.	.	.	.
64221	11q24.2	11	124742959	124742959	G	A	G>A	ROBO3	exonic	nonsynonymous SNV	DDD4K.01914	DDD_2017	28135719	4293	0	exome	Developmental Delay (DD)	psychiatric disorder	validated	.	non-ssc	.	ROBO3:NM_022370:exon9:c.G1510A:p.G504S	.	.	.	.	.	.	4.17e-05	0	0.0003	0	0	0	0	0.0001	.	.	.	.	.	rs752275159	.	.	.	.	.	.
56980	11q24.3	11	129795019	129795019	G	A	G>A	PRDM10	exonic	nonsynonymous SNV	DDD4K.03433	DDD_2017	28135719	4293	0	exome	Developmental Delay (DD)	psychiatric disorder	validated	.	non-ssc	.	PRDM10:NM_199439:exon8:c.C1378T:p.R460C,PRDM10:NM_199438:exon9:c.C1390T:p.R464C,PRDM10:NM_199437:exon12:c.C1636T:p.R546C,PRDM10:NM_020228:exon13:c.C1648T:p.R550C	.	.	.	.	.	.	4.12e-05	0	8.64e-05	0	0	1.5e-05	0	0.0002	.	.	.	.	.	rs777711002	.	.	.	.	.	.
6540	12p13.33	12	333652	333652	G	A	G>A	SLC6A13	exonic	nonsynonymous SNV	DDD4K.00423	DDD_2017	28135719	4293	0	exome	Developmental Delay (DD)	psychiatric disorder	validated	.	non-ssc	.	SLC6A13:NM_001190997:exon8:c.C812T:p.P271L,SLC6A13:NM_016615:exon10:c.C1088T:p.P363L	0.0002	0.0008	.	.	.	.	0.0005	9.86e-05	0.0012	0	0	0.0006	0.0011	6.07e-05	0.0003	.	0.0005	.	.	rs143010356	.	.	.	.	.	.
283358	12p13.33	12	665930	665930	C	T	C>T	B4GALNT3	exonic	nonsynonymous SNV	DDD4K.01301	DDD_2017	28135719	4293	0	exome	Developmental Delay (DD)	psychiatric disorder	validated	.	non-ssc	.	B4GALNT3:NM_173593:exon15:c.C2278T:p.R760C	.	.	.	.	.	.	5e-05	0.0002	0	0	0	4.56e-05	0	6.08e-05	0.0002	0.0002	0.0001	.	.	rs373185758	COSM942618	1(endometrium)	.	.	.	.
65125	12p13.33	12	988775	988775	G	A	G>A	WNK1	exonic	nonsynonymous SNV	DDD4K.02307	DDD_2017	28135719	4293	0	exome	Developmental Delay (DD)	psychiatric disorder	validated	.	non-ssc	.	WNK1:NM_018979:exon11:c.G2410A:p.E804K	.	.	.	.	.	.	.	.	.	.	.	.	.	.	.	.	.	.	.	.	.	.	.	.	.	.
7004	12p13.33	12	3127744	3127744	A	G	A>G	TEAD4	exonic	nonsynonymous SNV	DDD4K.00867	DDD_2017	28135719	4293	0	exome	Developmental Delay (DD)	psychiatric disorder	validated	.	non-ssc	.	TEAD4:NM_201443:exon5:c.A130G:p.T44A,TEAD4:NM_201441:exon6:c.A388G:p.T130A,TEAD4:NM_003213:exon7:c.A517G:p.T173A	.	.	.	.	.	.	.	.	.	.	.	.	.	.	.	.	.	.	.	.	.	.	.	.	.	.
4704	12p13.32	12	4764036	4764036	A	G	A>G	NDUFA9	exonic	nonsynonymous SNV	DDD4K.02025	DDD_2017	28135719	4293	0	exome	Developmental Delay (DD)	psychiatric disorder	validated	.	non-ssc	.	NDUFA9:NM_005002:exon3:c.A266G:p.Y89C	.	.	.	.	.	.	.	.	.	.	.	.	.	.	.	.	.	.	.	.	.	.	.	.	.	.
26290	12p13.32	12	4870167	4870167	G	A	G>A	GALNT8	exonic	nonsynonymous SNV	DDD4K.02429	DDD_2017	28135719	4293	0	exome	Developmental Delay (DD)	psychiatric disorder	validated	.	non-ssc	.	GALNT8:NM_017417:exon7:c.G1217A:p.R406Q	.	.	.	.	.	.	1.65e-05	0	0	0.0001	0	1.5e-05	0	0	.	.	.	.	.	rs373711782	COSM239946	1(stomach);1(prostate)	.	.	.	.
1108	12p13.31	12	6690297	6690297	C	T	C>T	CHD4	exonic	nonsynonymous SNV	DDD4K.01046	DDD_2017	28135719	4293	0	exome	Developmental Delay (DD)	psychiatric disorder	validated	.	non-ssc	.	CHD4:NM_001297553:exon32:c.G4801A:p.V1601I,CHD4:NM_001273:exon33:c.G4822A:p.V1608I	.	.	.	.	.	.	6.59e-05	0	0	0.0001	0	4.5e-05	0	0.0002	.	.	.	.	.	rs201992075	.	.	Pathogenic	SIFRIM-HITZ-WEISS_SYNDROME	RCV000257639.1	MedGen:OMIM
1108	12p13.31	12	6697549	6697549	C	T	C>T	CHD4	exonic	nonsynonymous SNV	DDD4K.02025	DDD_2017	28135719	4293	0	exome	Developmental Delay (DD)	psychiatric disorder	validated	.	non-ssc	.	CHD4:NM_001297553:exon22:c.G3359A:p.R1120Q,CHD4:NM_001273:exon23:c.G3380A:p.R1127Q	.	.	.	.	.	.	.	.	.	.	.	.	.	.	.	.	.	.	.	.	COSM1639219;COSM1639220;COSM1639221	1(stomach);1(oesophagus);1(prostate)	Pathogenic	SIFRIM-HITZ-WEISS_SYNDROME	RCV000257626.1	MedGen:OMIM
1108	12p13.31	12	6700879	6700879	C	T	C>T	CHD4	exonic	nonsynonymous SNV	DDD4K.02364	DDD_2017	28135719	4293	0	exome	Developmental Delay (DD)	psychiatric disorder	validated	.	non-ssc	.	CHD4:NM_001297553:exon20:c.G3182A:p.R1061H,CHD4:NM_001273:exon21:c.G3203A:p.R1068H	.	.	.	.	.	.	.	.	.	.	.	.	.	.	.	.	.	.	.	.	COSM2098490	1(large_intestine)	Pathogenic	SIFRIM-HITZ-WEISS_SYNDROME	RCV000256595.1	MedGen:OMIM
1108	12p13.31	12	6701647	6701647	T	C	T>C	CHD4	exonic	nonsynonymous SNV	DDD4K.02791	DDD_2017	28135719	4293	0	exome	Developmental Delay (DD)	psychiatric disorder	validated	.	non-ssc	.	CHD4:NM_001297553:exon18:c.A2839G:p.M947V,CHD4:NM_001273:exon19:c.A2860G:p.M954V	.	.	.	.	.	.	.	.	.	.	.	.	.	.	.	.	.	.	.	.	.	.	.	.	.	.
1108	12p13.31	12	6702357	6702357	G	T	G>T	CHD4	exonic	nonsynonymous SNV	DDD4K.02181	DDD_2017	28135719	4293	0	exome	Developmental Delay (DD)	psychiatric disorder	validated	.	non-ssc	.	CHD4:NM_001297553:exon16:c.C2531A:p.S844Y,CHD4:NM_001273:exon17:c.C2552A:p.S851Y	.	.	.	.	.	.	.	.	.	.	.	.	.	.	.	.	.	.	.	.	.	.	Pathogenic	SIFRIM-HITZ-WEISS_SYNDROME	RCV000257090.1	MedGen:OMIM
1108	12p13.31	12	6705263	6705263	G	A	G>A	CHD4	exonic	nonsynonymous SNV	DDD4K.02954	DDD_2017	28135719	4293	0	exome	Developmental Delay (DD)	psychiatric disorder	validated	.	non-ssc	.	CHD4:NM_001297553:exon12:c.C1912T:p.R638W,CHD4:NM_001273:exon13:c.C1933T:p.R645W	.	.	.	.	.	.	.	.	.	.	.	.	.	.	.	.	.	.	.	.	.	.	.	.	.	.
1108	12p13.31	12	6709021	6709021	C	T	C>T	CHD4	exonic	nonsynonymous SNV	DDD4K.03938	DDD_2017	28135719	4293	0	exome	Developmental Delay (DD)	psychiatric disorder	validated	.	non-ssc	.	CHD4:NM_001297553:exon9:c.G1379A:p.C460Y,CHD4:NM_001273:exon10:c.G1400A:p.C467Y	.	.	.	.	.	.	.	.	.	.	.	.	.	.	.	.	.	.	.	.	.	.	.	.	.	.
2026	12p13.31	12	7030866	7030866	C	T	C>T	ENO2	exonic	nonsynonymous SNV	DDD4K.01914	DDD_2017	28135719	4293	0	exome	Developmental Delay (DD)	psychiatric disorder	validated	.	non-ssc	.	ENO2:NM_001975:exon9:c.C988T:p.R330W	.	.	.	.	.	.	.	.	.	.	.	.	.	.	.	.	.	.	.	rs199981286	.	.	.	.	.	.
1822	12p13.31	12	7048293	7048293	A	G	A>G	ATN1	exonic	nonsynonymous SNV	DDD4K.01926	DDD_2017	28135719	4293	0	exome	Developmental Delay (DD)	psychiatric disorder	validated	.	non-ssc	.	ATN1:NM_001007026:exon7:c.A3167G:p.H1056R,ATN1:NM_001940:exon7:c.A3167G:p.H1056R	.	.	.	.	.	.	.	.	.	.	.	.	.	.	.	.	.	.	.	.	.	.	.	.	.	.
2904	12p13.1	12	13720098	13720098	C	G	C>G	GRIN2B	exonic	nonsynonymous SNV	DDD4K.03581	DDD_2017	28135719	4293	0	exome	Developmental Delay (DD)	psychiatric disorder	validated	.	non-ssc	.	GRIN2B:NM_000834:exon12:c.G2459C:p.G820A	.	.	.	.	.	.	.	.	.	.	.	.	.	.	.	.	.	.	.	rs797044849	.	.	Pathogenic\x2cPathogenic|Likely pathogenic|Uncertain significance|Uncertain significance	not_provided\x2cInborn_genetic_diseases|not_provided|Epileptic_encephalopathy\x2c_early_infantile\x2c_27|Mental_retardation\x2c_autosomal_dominant_6	RCV000217079.2\x2cRCV000190648.1|RCV000235569.2|RCV000464558.1|RCV000464558.1	MedGen\x2cMeSH:MedGen|MedGen|MedGen:OMIM|MedGen:OMIM
10060	12p12.1	12	22061091	22061091	C	T	C>T	ABCC9	exonic	nonsynonymous SNV	DDD4K.03821	DDD_2017	28135719	4293	0	exome	Developmental Delay (DD)	psychiatric disorder	validated	.	non-ssc	.	ABCC9:NM_005691:exon9:c.G1375A:p.G459S,ABCC9:NM_020297:exon9:c.G1375A:p.G459S	.	.	.	.	.	.	.	.	.	.	.	.	.	.	.	.	.	.	.	.	.	.	.	.	.	.
6660	12p12.1	12	23689589	23689589	C	G	C>G	SOX5	exonic	nonsynonymous SNV	DDD4K.00018	DDD_2017	28135719	4293	0	exome	Developmental Delay (DD)	psychiatric disorder	validated	.	non-ssc	.	SOX5:NM_178010:exon6:c.G628C:p.A210P,SOX5:NM_001261415:exon14:c.G1756C:p.A586P,SOX5:NM_001330785:exon14:c.G1681C:p.A561P,SOX5:NM_006940:exon14:c.G1786C:p.A596P,SOX5:NM_001261414:exon16:c.G1423C:p.A475P,SOX5:NM_152989:exon17:c.G1747C:p.A583P	.	.	.	.	.	.	.	.	.	.	.	.	.	.	.	.	.	.	.	.	.	.	.	.	.	.
586	12p12.1	12	24970955	24970955	A	G	A>G	BCAT1	exonic	nonsynonymous SNV	DDD4K.02060	DDD_2017	28135719	4293	0	exome	Developmental Delay (DD)	psychiatric disorder	validated	.	non-ssc	.	BCAT1:NM_001178092:exon9:c.T965C:p.I322T,BCAT1:NM_001178091:exon10:c.T1037C:p.I346T,BCAT1:NM_001178093:exon11:c.T1184C:p.I395T,BCAT1:NM_001178094:exon11:c.T1145C:p.I382T,BCAT1:NM_005504:exon11:c.T1148C:p.I383T	.	.	.	.	.	.	.	.	.	.	.	.	.	.	.	.	.	.	.	.	.	.	.	.	.	.
55259	12p12.1	12	25297531	25297531	C	T	C>T	CASC1	exonic	nonsynonymous SNV	DDD4K.01984	DDD_2017	28135719	4293	0	exome	Developmental Delay (DD)	psychiatric disorder	validated	.	non-ssc	.	CASC1:NM_001204101:exon6:c.G575A:p.R192Q,CASC1:NM_001319977:exon7:c.G416A:p.R139Q,CASC1:NM_001082973:exon8:c.G752A:p.R251Q,CASC1:NM_001319978:exon8:c.G632A:p.R211Q,CASC1:NM_001082972:exon9:c.G944A:p.R315Q,CASC1:NM_018272:exon9:c.G770A:p.R257Q,CASC1:NM_001204102:exon10:c.G632A:p.R211Q	.	.	.	.	.	.	.	.	.	.	.	.	.	.	.	.	.	.	.	.	COSM3459495;COSM3459494	1(skin)	.	.	.	.
8082	12p12.1	12	26377286	26377286	C	T	C>T	SSPN	exonic	nonsynonymous SNV	DDD4K.02103	DDD_2017	28135719	4293	0	exome	Developmental Delay (DD)	psychiatric disorder	validated	.	non-ssc	.	SSPN:NM_001135823:exon2:c.C31T:p.R11W,SSPN:NM_005086:exon2:c.C340T:p.R114W	.	.	.	.	.	.	8.24e-06	0	0	0.0001	0	0	0	0	.	.	.	.	.	rs761742193	.	.	.	.	.	.
51768	12p11.23	12	27149757	27149757	C	G	C>G	TM7SF3	exonic	nonsynonymous SNV	DDD4K.03079	DDD_2017	28135719	4293	0	exome	Developmental Delay (DD)	psychiatric disorder	validated	.	non-ssc	.	TM7SF3:NM_016551:exon4:c.G436C:p.D146H	.	.	.	.	.	.	.	.	.	.	.	.	.	.	.	.	.	.	.	.	.	.	.	.	.	.
341350	12p11.22	12	29631780	29631780	C	T	C>T	OVCH1	exonic	nonsynonymous SNV	DDD4K.03958	DDD_2017	28135719	4293	0	exome	Developmental Delay (DD)	psychiatric disorder	validated	.	non-ssc	.	OVCH1:NM_183378:exon9:c.G1057A:p.G353R	.	.	.	.	.	.	.	.	.	.	.	.	.	.	.	.	.	.	.	.	.	.	.	.	.	.
83857	12p11.22	12	29736502	29736502	C	T	C>T	TMTC1	exonic	nonsynonymous SNV	DDD4K.02001	DDD_2017	28135719	4293	0	exome	Developmental Delay (DD)	psychiatric disorder	validated	.	non-ssc	.	TMTC1:NM_001193451:exon8:c.G1256A:p.G419D,TMTC1:NM_175861:exon8:c.G932A:p.G311D	.	.	.	.	.	.	.	.	.	.	.	.	.	.	.	.	.	.	.	.	.	.	.	.	.	.
9416	12q13.12	12	49227280	49227280	C	T	C>T	DDX23	exonic	nonsynonymous SNV	DDD4K.00769	DDD_2017	28135719	4293	0	exome	Developmental Delay (DD)	psychiatric disorder	validated	.	non-ssc	.	DDX23:NM_004818:exon13:c.G1583A:p.R528H	.	.	.	.	.	.	.	.	.	.	.	.	.	.	.	.	.	.	.	.	.	.	.	.	.	.
9416	12q13.12	12	49227281	49227281	G	A	G>A	DDX23	exonic	nonsynonymous SNV	DDD4K.01100	DDD_2017	28135719	4293	0	exome	Developmental Delay (DD)	psychiatric disorder	validated	.	non-ssc	.	DDX23:NM_004818:exon13:c.C1582T:p.R528C	.	.	.	.	.	.	.	.	.	.	.	.	.	.	.	.	.	.	.	.	.	.	.	.	.	.
8085	12q13.12	12	49420264	49420264	A	C	A>C	KMT2D	exonic	nonsynonymous SNV	DDD4K.00039	DDD_2017	28135719	4293	0	exome	Developmental Delay (DD)	psychiatric disorder	validated	.	non-ssc	.	KMT2D:NM_003482:exon48:c.T15485G:p.V5162G	.	.	.	.	.	.	.	.	.	.	.	.	.	.	.	.	.	.	.	.	.	.	.	.	.	.
57701	12q13.12	12	50189064	50189064	G	T	G>T	NCKAP5L	exonic	nonsynonymous SNV	DDD4K.01064	DDD_2017	28135719	4293	0	exome	Developmental Delay (DD)	psychiatric disorder	validated	.	non-ssc	.	NCKAP5L:NM_001037806:exon8:c.C2579A:p.S860Y	.	.	.	.	.	.	.	.	.	.	.	.	.	.	.	.	.	.	.	.	.	.	.	.	.	.
6602	12q13.12	12	50492564	50492564	C	G	C>G	SMARCD1	exonic	nonsynonymous SNV	DDD4K.02659	DDD_2017	28135719	4293	0	exome	Developmental Delay (DD)	psychiatric disorder	validated	.	non-ssc	.	SMARCD1:NM_139071:exon11:c.C1337G:p.A446G,SMARCD1:NM_003076:exon12:c.C1460G:p.A487G	0.0002	.	.	.	.	0.001	4.13e-05	0	0	0	0	0	0	0.0003	.	.	.	.	.	rs541161761	.	.	.	.	.	.
6602	12q13.12	12	50492587	50492587	T	C	T>C	SMARCD1	exonic	nonsynonymous SNV	DDD4K.01825	DDD_2017	28135719	4293	0	exome	Developmental Delay (DD)	psychiatric disorder	validated	.	non-ssc	.	SMARCD1:NM_139071:exon11:c.T1360C:p.F454L,SMARCD1:NM_003076:exon12:c.T1483C:p.F495L	.	.	.	.	.	.	.	.	.	.	.	.	.	.	.	.	.	.	.	.	.	.	.	.	.	.
6334	12q13.13	12	52082570	52082570	A	G	A>G	SCN8A	exonic	nonsynonymous SNV	DDD4K.03953	DDD_2017	28135719	4293	0	exome	Developmental Delay (DD)	psychiatric disorder	validated	.	non-ssc	.	SCN8A:NM_001177984:exon6:c.A643G:p.N215D,SCN8A:NM_014191:exon6:c.A643G:p.N215D	.	.	.	.	.	.	.	.	.	.	.	.	.	.	.	.	.	.	.	.	.	.	Pathogenic	Early_infantile_epileptic_encephalopathy_13	RCV000239741.1	MedGen:OMIM
6334	12q13.13	12	52200143	52200143	G	A	G>A	SCN8A	exonic	nonsynonymous SNV	DDD4K.00310	DDD_2017	28135719	4293	0	exome	Developmental Delay (DD)	psychiatric disorder	validated	.	non-ssc	.	SCN8A:NM_001177984:exon26:c.G4750A:p.G1584R,SCN8A:NM_001330260:exon27:c.G4873A:p.G1625R,SCN8A:NM_014191:exon27:c.G4873A:p.G1625R	.	.	.	.	.	.	.	.	.	.	.	.	.	.	.	.	.	.	.	.	.	.	Pathogenic\x2cLikely pathogenic	Early_infantile_epileptic_encephalopathy_13\x2cnot_provided	RCV000239742.1\x2cRCV000442495.1	MedGen:OMIM\x2cMedGen
283337	12q13.13	12	53580237	53580237	C	T	C>T	ZNF740	exonic	nonsynonymous SNV	DDD4K.00239	DDD_2017	28135719	4293	0	exome	Developmental Delay (DD)	psychiatric disorder	validated	.	non-ssc	.	ZNF740:NM_001004304:exon6:c.C436T:p.R146C	.	.	.	.	.	.	.	.	.	.	.	.	.	.	.	.	.	.	.	.	COSM1159079	2(pancreas);1(large_intestine)	.	.	.	.
9700	12q13.13	12	53686086	53686086	C	G	C>G	ESPL1	exonic	nonsynonymous SNV	DDD4K.02865	DDD_2017	28135719	4293	0	exome	Developmental Delay (DD)	psychiatric disorder	validated	.	non-ssc	.	ESPL1:NM_012291:exon28:c.C5821G:p.Q1941E	.	.	.	.	.	.	.	.	.	.	.	.	.	.	.	.	.	.	.	.	.	.	.	.	.	.
23468	12q13.13	12	54635689	54635689	C	A	C>A	CBX5	exonic	nonsynonymous SNV	DDD4K.02474	DDD_2017	28135719	4293	0	exome	Developmental Delay (DD)	psychiatric disorder	validated	.	non-ssc	.	CBX5:NM_001127321:exon5:c.G426T:p.W142C,CBX5:NM_001127322:exon5:c.G426T:p.W142C,CBX5:NM_012117:exon5:c.G426T:p.W142C	.	.	.	.	.	.	.	.	.	.	.	.	.	.	.	.	.	.	.	.	.	.	.	.	.	.
4327	12q13.2	12	56230875	56230875	G	A	G>A	MMP19	exonic	nonsynonymous SNV	DDD4K.03283	DDD_2017	28135719	4293	0	exome	Developmental Delay (DD)	psychiatric disorder	validated	.	non-ssc	.	MMP19:NM_002429:exon9:c.C1472T:p.T491M	0.001	0.0008	.	0.004	.	.	0.0002	9.69e-05	8.68e-05	0.0021	0	1.54e-05	0	0	.	.	.	0.011	.	rs17844806	COSM4786279;COSM1362942	1(large_intestine)	.	.	.	.
4640	12q13.3	12	57442097	57442097	A	T	A>T	MYO1A	exonic	nonsynonymous SNV	DDD4K.02952	DDD_2017	28135719	4293	0	exome	Developmental Delay (DD)	psychiatric disorder	validated	.	non-ssc	.	MYO1A:NM_005379:exon2:c.T11A:p.L4Q,MYO1A:NM_001256041:exon3:c.T11A:p.L4Q	.	.	.	.	.	.	.	.	.	.	.	.	.	.	.	.	.	.	.	.	.	.	.	.	.	.
121227	12q14.1	12	59274606	59274606	A	C	A>C	LRIG3	exonic	nonsynonymous SNV	DDD4K.02981	DDD_2017	28135719	4293	0	exome	Developmental Delay (DD)	psychiatric disorder	validated	.	non-ssc	.	LRIG3:NM_001136051:exon13:c.T1378G:p.C460G,LRIG3:NM_153377:exon13:c.T1558G:p.C520G	.	.	.	.	.	.	.	.	.	.	.	.	.	.	.	.	.	.	.	.	.	.	.	.	.	.
57122	12q15	12	69126424	69126424	G	A	G>A	NUP107	exonic	nonsynonymous SNV	DDD4K.02141	DDD_2017	28135719	4293	0	exome	Developmental Delay (DD)	psychiatric disorder	validated	.	non-ssc	.	NUP107:NM_001330192:exon23:c.G1919A:p.R640H,NUP107:NM_020401:exon23:c.G2006A:p.R669H	.	.	.	.	.	.	.	.	.	.	.	.	.	.	.	.	.	.	.	.	.	.	.	.	.	.
10576	12q15	12	69983431	69983431	C	G	C>G	CCT2	exonic	nonsynonymous SNV	DDD4K.01017	DDD_2017	28135719	4293	0	exome	Developmental Delay (DD)	psychiatric disorder	validated	.	non-ssc	.	CCT2:NM_001198842:exon7:c.C472G:p.L158V,CCT2:NM_006431:exon7:c.C613G:p.L205V	.	.	.	.	.	.	.	.	.	.	.	.	.	.	.	.	.	.	.	.	.	.	.	.	.	.
196446	12q15	12	70345911	70345911	T	A	T>A	MYRFL	exonic	nonsynonymous SNV	DDD4K.03705	DDD_2017	28135719	4293	0	exome	Developmental Delay (DD)	psychiatric disorder	validated	.	non-ssc	.	MYRFL:NM_182530:exon20:c.T2243A:p.V748D	.	.	.	.	.	.	.	.	.	.	.	.	.	.	.	.	.	.	.	.	.	.	.	.	.	.
6857	12q21.2	12	79689999	79689999	G	A	G>A	SYT1	exonic	nonsynonymous SNV	DDD4K.00652	DDD_2017	28135719	4293	0	exome	Developmental Delay (DD)	psychiatric disorder	validated	.	non-ssc	.	SYT1:NM_001135806:exon6:c.G625A:p.E209K,SYT1:NM_001291901:exon6:c.G616A:p.E206K,SYT1:NM_005639:exon7:c.G625A:p.E209K,SYT1:NM_001135805:exon8:c.G625A:p.E209K	.	.	.	.	.	.	.	.	.	.	.	.	.	.	.	.	.	.	.	.	.	.	.	.	.	.
6857	12q21.2	12	79747378	79747378	A	G	A>G	SYT1	exonic	nonsynonymous SNV	DDD4K.00311	DDD_2017	28135719	4293	0	exome	Developmental Delay (DD)	psychiatric disorder	validated	.	non-ssc	.	SYT1:NM_001135806:exon8:c.A907G:p.M303V,SYT1:NM_001291901:exon8:c.A898G:p.M300V,SYT1:NM_005639:exon9:c.A907G:p.M303V,SYT1:NM_001135805:exon10:c.A907G:p.M303V	.	.	.	.	.	.	.	.	.	.	.	.	.	.	.	.	.	.	.	.	.	.	.	.	.	.
6857	12q21.2	12	79747399	79747399	G	C	G>C	SYT1	exonic	nonsynonymous SNV	DDD4K.00487	DDD_2017	28135719	4293	0	exome	Developmental Delay (DD)	psychiatric disorder	validated	.	non-ssc	.	SYT1:NM_001135806:exon8:c.G928C:p.D310H,SYT1:NM_001291901:exon8:c.G919C:p.D307H,SYT1:NM_005639:exon9:c.G928C:p.D310H,SYT1:NM_001135805:exon10:c.G928C:p.D310H	.	.	.	.	.	.	.	.	.	.	.	.	.	.	.	.	.	.	.	.	.	.	.	.	.	.
5074	12q21.2	12	79988129	79988129	C	T	C>T	PAWR	exonic	nonsynonymous SNV	DDD4K.01226	DDD_2017	28135719	4293	0	exome	Developmental Delay (DD)	psychiatric disorder	validated	.	non-ssc	.	PAWR:NM_002583:exon6:c.G916A:p.E306K	.	.	.	.	.	.	.	.	.	.	.	.	.	.	.	.	.	.	.	.	.	.	.	.	.	.
84125	12q21.31	12	85517906	85517906	A	T	A>T	LRRIQ1	exonic	nonsynonymous SNV	DDD4K.03535	DDD_2017	28135719	4293	0	exome	Developmental Delay (DD)	psychiatric disorder	validated	.	non-ssc	.	LRRIQ1:NM_001079910:exon17:c.A3616T:p.I1206L	.	.	.	.	.	.	.	.	.	.	.	.	.	.	.	.	.	.	.	.	.	.	.	.	.	.
490	12q21.33	12	90005088	90005088	T	G	T>G	ATP2B1	exonic	nonsynonymous SNV	DDD4K.01745	DDD_2017	28135719	4293	0	exome	Developmental Delay (DD)	psychiatric disorder	validated	.	non-ssc	.	ATP2B1:NM_001001323:exon12:c.A2129C:p.D710A,ATP2B1:NM_001682:exon12:c.A2129C:p.D710A	.	.	.	.	.	.	.	.	.	.	.	.	.	.	.	.	.	.	.	.	.	.	.	.	.	.
79158	12q23.2	12	102158848	102158848	G	A	G>A	GNPTAB	exonic	nonsynonymous SNV	DDD4K.03166	DDD_2017	28135719	4293	0	exome	Developmental Delay (DD)	psychiatric disorder	validated	.	non-ssc	.	GNPTAB:NM_024312:exon13:c.C1847T:p.T616M	.	.	.	.	.	.	8.24e-06	0	0	0.0001	0	0	0	0	.	.	.	.	.	rs780754017	.	.	.	.	.	.
32	12q24.11	12	109690876	109690876	G	T	G>T	ACACB	exonic	nonsynonymous SNV	DDD4K.02829	DDD_2017	28135719	4293	0	exome	Developmental Delay (DD)	psychiatric disorder	validated	.	non-ssc	.	ACACB:NM_001093:exon42:c.G5958T:p.M1986I	.	.	.	.	.	.	8.32e-06	0	0	0	0	0	0	6.41e-05	.	.	.	.	.	rs752819679	.	.	.	.	.	.
121643	12q24.11	12	109717613	109717613	C	T	C>T	FOXN4	exonic	nonsynonymous SNV	DDD4K.02025	DDD_2017	28135719	4293	0	exome	Developmental Delay (DD)	psychiatric disorder	validated	.	non-ssc	.	FOXN4:NM_213596:exon10:c.G1417A:p.D473N	.	.	.	.	.	.	1.19e-05	0	0.0002	0	0	0	0	0	.	.	.	.	.	rs761068034	.	.	.	.	.	.
488	12q24.11	12	110784269	110784269	G	T	G>T	ATP2A2	exonic	nonsynonymous SNV	DDD4K.02291	DDD_2017	28135719	4293	0	exome	Developmental Delay (DD)	psychiatric disorder	validated	.	non-ssc	.	ATP2A2:NM_170665:exon20:c.G3123T:p.W1041C	.	.	.	.	.	.	.	.	.	.	.	.	.	.	.	.	.	.	.	.	.	.	.	.	.	.
23316	12q24.12	12	111786041	111786041	G	A	G>A	CUX2	exonic	nonsynonymous SNV	DDD4K.02055	DDD_2017	28135719	4293	0	exome	Developmental Delay (DD)	psychiatric disorder	validated	.	non-ssc	.	CUX2:NM_015267:exon22:c.G4373A:p.R1458Q	.	.	.	.	.	.	8.33e-06	0	0	0	0	1.51e-05	0	0	.	.	.	.	.	rs772711325	.	.	.	.	.	.
5781	12q24.13	12	112888168	112888168	T	G	T>G	PTPN11	exonic	nonsynonymous SNV	DDD4K.03133	DDD_2017	28135719	4293	0	exome	Developmental Delay (DD)	psychiatric disorder	validated	.	non-ssc	.	PTPN11:NM_001330437:exon3:c.T184G:p.Y62D,PTPN11:NM_002834:exon3:c.T184G:p.Y62D,PTPN11:NM_080601:exon3:c.T184G:p.Y62D	.	.	.	.	.	.	.	.	.	.	.	.	.	.	.	.	.	.	.	rs121918460	COSM5945276	1(haematopoietic_and_lymphoid_tissue)	Pathogenic|Pathogenic|Pathogenic|Pathogenic	Noonan_syndrome_1|Rasopathy|not_provided|Noonan_syndrome	RCV000014257.23|RCV000033466.6|RCV000153794.4|RCV000156993.1	MedGen:OMIM|MedGen:Orphanet|MedGen|MeSH:MedGen:Orphanet:SNOMED_CT
5781	12q24.13	12	112915523	112915523	A	G	A>G	PTPN11	exonic	nonsynonymous SNV	DDD4K.01059	DDD_2017	28135719	4293	0	exome	Developmental Delay (DD)	psychiatric disorder	validated	.	non-ssc	.	PTPN11:NM_001330437:exon8:c.A922G:p.N308D,PTPN11:NM_002834:exon8:c.A922G:p.N308D,PTPN11:NM_080601:exon8:c.A922G:p.N308D	.	.	.	.	.	.	8.24e-06	0	0	0	0	1.5e-05	0	0	0.0001	.	0.0001	.	.	rs28933386	COSM24612	3(haematopoietic_and_lymphoid_tissue);1(central_nervous_system)	Pathogenic|Pathogenic|Pathogenic|Pathogenic	Noonan_syndrome_1|Rasopathy|not_provided|Noonan_syndrome	RCV000014254.32|RCV000033516.9|RCV000077863.5|RCV000156977.3	MedGen:OMIM|MedGen:Orphanet|MedGen|MeSH:MedGen:Orphanet:SNOMED_CT
5781	12q24.13	12	112926887	112926887	G	A	G>A	PTPN11	exonic	nonsynonymous SNV	DDD4K.01080	DDD_2017	28135719	4293	0	exome	Developmental Delay (DD)	psychiatric disorder	validated	.	non-ssc	.	PTPN11:NM_001330437:exon13:c.G1519A:p.G507R,PTPN11:NM_002834:exon13:c.G1507A:p.G503R	.	.	.	.	.	.	.	.	.	.	.	.	.	.	.	.	.	.	.	rs397507545	COSM14259	5(haematopoietic_and_lymphoid_tissue)	Pathogenic|Pathogenic|Pathogenic\x2cPathogenic|Pathogenic|Pathogenic	Rasopathy|not_provided|Noonan_syndrome\x2cRasopathy|Noonan_syndrome|not_provided	RCV000033546.6|RCV000077852.5|RCV000157015.1\x2cRCV000033545.5|RCV000156971.1|RCV000210040.2	MedGen:Orphanet|MedGen|MeSH:MedGen:Orphanet:SNOMED_CT\x2cMedGen:Orphanet|MeSH:MedGen:Orphanet:SNOMED_CT|MedGen
23389	12q24.21	12	116408461	116408461	G	A	G>A	MED13L	exonic	nonsynonymous SNV	DDD4K.02689	DDD_2017	28135719	4293	0	exome	Developmental Delay (DD)	psychiatric disorder	validated	.	non-ssc	.	MED13L:NM_015335:exon27:c.C6005T:p.S2002L	.	.	.	.	.	.	.	.	.	.	.	.	.	.	.	.	.	.	.	.	.	.	.	.	.	.
23389	12q24.21	12	116413012	116413012	C	T	C>T	MED13L	exonic	nonsynonymous SNV	DDD4K.02552	DDD_2017	28135719	4293	0	exome	Developmental Delay (DD)	psychiatric disorder	validated	.	non-ssc	.	MED13L:NM_015335:exon25:c.G5695A:p.G1899R	.	.	.	.	.	.	.	.	.	.	.	.	.	.	.	.	.	.	.	.	.	.	.	.	.	.
23014	12q24.22	12	117595691	117595691	T	A	T>A	FBXO21	exonic	nonsynonymous SNV	DDD4K.00049	DDD_2017	28135719	4293	0	exome	Developmental Delay (DD)	psychiatric disorder	validated	.	non-ssc	.	FBXO21:NM_015002:exon10:c.A1504T:p.M502L,FBXO21:NM_033624:exon10:c.A1525T:p.M509L	.	.	.	.	.	.	.	.	.	.	.	.	.	.	.	.	.	.	.	.	.	.	.	.	.	.
84530	12q24.23	12	119540126	119540126	G	A	G>A	SRRM4	exonic	nonsynonymous SNV	DDD4K.01226	DDD_2017	28135719	4293	0	exome	Developmental Delay (DD)	psychiatric disorder	validated	.	non-ssc	.	SRRM4:NM_194286:exon2:c.G217A:p.G73S	.	.	.	.	.	.	.	.	.	.	.	.	.	.	.	.	.	.	.	.	.	.	.	.	.	.
11113	12q24.23	12	120189944	120189944	G	A	G>A	CIT	exonic	nonsynonymous SNV	DDD4K.00286	DDD_2017	28135719	4293	0	exome	Developmental Delay (DD)	psychiatric disorder	validated	.	non-ssc	.	CIT:NM_007174:exon22:c.C2689T:p.R897W,CIT:NM_001206999:exon23:c.C2815T:p.R939W	.	.	.	.	.	.	1.66e-05	0	0	0	0	3.01e-05	0	0	.	.	.	.	.	rs772291317	.	.	.	.	.	.
23067	12q24.31	12	122268072	122268072	A	G	A>G	SETD1B	exonic	nonsynonymous SNV	DDD4K.02712	DDD_2017	28135719	4293	0	exome	Developmental Delay (DD)	psychiatric disorder	validated	.	non-ssc	.	SETD1B:NM_015048:exon17:c.A5699G:p.Y1900C	.	.	.	.	.	.	.	.	.	.	.	.	.	.	.	.	.	.	.	.	.	.	.	.	.	.
9026	12q24.31	12	123340818	123340818	C	T	C>T	HIP1R	exonic	nonsynonymous SNV	DDD4K.01759	DDD_2017	28135719	4293	0	exome	Developmental Delay (DD)	psychiatric disorder	validated	.	non-ssc	.	HIP1R:NM_001303097:exon15:c.C1328T:p.T443M,HIP1R:NM_001303099:exon15:c.C1292T:p.T431M,HIP1R:NM_003959:exon15:c.C1328T:p.T443M	.	.	.	.	.	.	1.67e-05	0	0	0	0	0	0	0.0001	.	.	.	.	.	rs762195875	COSM2225437	1(large_intestine)	.	.	.	.
5412	13q12.3	13	30351370	30351370	T	C	T>C	UBL3	exonic	nonsynonymous SNV	DDD4K.03075	DDD_2017	28135719	4293	0	exome	Developmental Delay (DD)	psychiatric disorder	validated	.	non-ssc	.	UBL3:NM_007106:exon2:c.A58G:p.K20E	.	.	.	.	.	.	.	.	.	.	.	.	.	.	.	.	.	.	.	.	.	.	.	.	.	.
341640	13q13.3	13	39262085	39262085	G	T	G>T	FREM2	exonic	nonsynonymous SNV	DDD4K.01111	DDD_2017	28135719	4293	0	exome	Developmental Delay (DD)	psychiatric disorder	validated	.	non-ssc	.	FREM2:NM_207361:exon1:c.G604T:p.A202S	.	.	.	.	.	.	.	.	.	.	.	.	.	.	.	.	.	.	.	.	.	.	.	.	.	.
55068	13q14.11	13	43872618	43872618	C	T	C>T	ENOX1	exonic	nonsynonymous SNV	DDD4K.01346	DDD_2017	28135719	4293	0	exome	Developmental Delay (DD)	psychiatric disorder	validated	.	non-ssc	.	ENOX1:NM_001347963:exon11:c.G1415A:p.R472H,ENOX1:NM_001347965:exon11:c.G1310A:p.R437H,ENOX1:NM_001347967:exon11:c.G1310A:p.R437H,ENOX1:NM_001347970:exon11:c.G1193A:p.R398H,ENOX1:NM_001347971:exon11:c.G1193A:p.R398H,ENOX1:NM_001127615:exon12:c.G1310A:p.R437H,ENOX1:NM_001242863:exon12:c.G1310A:p.R437H,ENOX1:NM_001347969:exon12:c.G1310A:p.R437H,ENOX1:NM_017993:exon12:c.G1310A:p.R437H,ENOX1:NM_001347…	.	.	.	.	.	.	.	.	.	.	.	.	.	.	.	.	.	.	.	.	.	.	.	.	.	.
81602	13q14.2	13	49842176	49842176	G	T	G>T	CDADC1	exonic	nonsynonymous SNV	DDD4K.02144	DDD_2017	28135719	4293	0	exome	Developmental Delay (DD)	psychiatric disorder	validated	.	non-ssc	.	CDADC1:NM_001193478:exon5:c.G981T:p.R327S,CDADC1:NM_030911:exon5:c.G981T:p.R327S	.	.	.	.	.	.	.	.	.	.	.	.	.	.	.	.	.	.	.	.	.	.	.	.	.	.
23077	13q22.3	13	77657240	77657240	G	A	G>A	MYCBP2	exonic	nonsynonymous SNV	DDD4K.02455	DDD_2017	28135719	4293	0	exome	Developmental Delay (DD)	psychiatric disorder	validated	.	non-ssc	.	MYCBP2:NM_015057:exon63:c.C10963T:p.R3655C	.	.	.	.	.	.	8.25e-06	9.61e-05	0	0	0	0	0	0	.	.	.	.	.	rs777629569	.	.	.	.	.	.
23077	13q22.3	13	77844588	77844588	C	T	C>T	MYCBP2	exonic	nonsynonymous SNV	DDD4K.04275	DDD_2017	28135719	4293	0	exome	Developmental Delay (DD)	psychiatric disorder	validated	.	non-ssc	.	MYCBP2:NM_015057:exon6:c.G1031A:p.G344D	.	.	.	.	.	.	.	.	.	.	.	.	.	.	.	.	.	.	.	.	COSM4931610;COSM4931609;COSM4931608	1(liver)	.	.	.	.
1282	13q34	13	110830197	110830197	C	T	C>T	COL4A1	exonic	nonsynonymous SNV	DDD4K.03879	DDD_2017	28135719	4293	0	exome	Developmental Delay (DD)	psychiatric disorder	validated	.	non-ssc	.	COL4A1:NM_001845:exon33:c.G2708A:p.G903D	.	.	.	.	.	.	.	.	.	.	.	.	.	.	.	.	.	.	.	.	.	.	.	.	.	.
23263	13q34	13	113728852	113728852	T	C	T>C	MCF2L	exonic	nonsynonymous SNV	DDD4K.01655	DDD_2017	28135719	4293	0	exome	Developmental Delay (DD)	psychiatric disorder	validated	.	non-ssc	.	MCF2L:NM_001112732:exon10:c.T1091C:p.L364P,MCF2L:NM_001320815:exon10:c.T1085C:p.L362P,MCF2L:NM_001320816:exon10:c.T1103C:p.L368P,MCF2L:NM_001320817:exon10:c.T1085C:p.L362P,MCF2L:NM_024979:exon10:c.T1085C:p.L362P	.	.	.	.	.	.	.	.	.	.	.	.	.	.	.	.	.	.	.	.	.	.	.	.	.	.
2155	13q34	13	113768274	113768274	C	T	C>T	F7	exonic	nonsynonymous SNV	DDD4K.01722	DDD_2017	28135719	4293	0	exome	Developmental Delay (DD)	psychiatric disorder	validated	.	non-ssc	.	F7:NM_001267554:exon2:c.C178T:p.H60Y,F7:NM_019616:exon4:c.C364T:p.H122Y,F7:NM_000131:exon5:c.C430T:p.H144Y	0.0002	.	.	.	0.001	.	0.0001	0	0.0002	0	0	0.0002	0	0	.	.	.	.	.	rs181538903	COSM2264053	1(stomach)	.	.	.	.
29986	14q11.2	14	21469472	21469472	C	G	C>G	SLC39A2	exonic	nonsynonymous SNV	DDD4K.02322	DDD_2017	28135719	4293	0	exome	Developmental Delay (DD)	psychiatric disorder	validated	.	non-ssc	.	SLC39A2:NM_014579:exon4:c.C664G:p.R222G	.	.	.	.	.	.	.	.	.	.	.	.	.	.	.	.	.	.	.	.	.	.	.	.	.	.
57523	14q12	14	24885633	24885633	G	A	G>A	NYNRIN	exonic	nonsynonymous SNV	DDD4K.00579	DDD_2017	28135719	4293	0	exome	Developmental Delay (DD)	psychiatric disorder	validated	.	non-ssc	.	NYNRIN:NM_025081:exon9:c.G4678A:p.E1560K	.	.	.	.	.	.	8.84e-06	0	0	0	0	1.6e-05	0	0	.	.	.	.	.	rs778733327	.	.	.	.	.	.
2999	14q12	14	25076907	25076907	G	A	G>A	GZMH	exonic	nonsynonymous SNV	DDD4K.02564	DDD_2017	28135719	4293	0	exome	Developmental Delay (DD)	psychiatric disorder	validated	.	non-ssc	.	GZMH:NM_001270780:exon3:c.C250T:p.R84W,GZMH:NM_001270781:exon3:c.C250T:p.R84W,GZMH:NM_033423:exon3:c.C250T:p.R84W	.	.	.	.	.	.	.	.	.	.	.	.	.	.	.	.	.	.	.	.	COSM1369426	1(large_intestine)	.	.	.	.
5587	14q12	14	30095714	30095714	C	T	C>T	PRKD1	exonic	nonsynonymous SNV	DDD4K.02323	DDD_2017	28135719	4293	0	exome	Developmental Delay (DD)	psychiatric disorder	validated	.	non-ssc	.	PRKD1:NM_002742:exon12:c.G1774A:p.G592R,PRKD1:NM_001330069:exon13:c.G1798A:p.G600R,PRKD1:NM_001348390:exon13:c.G1510A:p.G504R	.	.	.	.	.	.	.	.	.	.	.	.	.	.	.	.	.	.	.	.	.	.	Pathogenic	CONGENITAL_HEART_DEFECTS_AND_ECTODERMAL_DYSPLASIA	RCV000417214.1	MedGen:OMIM
5587	14q12	14	30095714	30095714	C	T	C>T	PRKD1	exonic	nonsynonymous SNV	DDD4K.03486	DDD_2017	28135719	4293	0	exome	Developmental Delay (DD)	psychiatric disorder	validated	.	non-ssc	.	PRKD1:NM_002742:exon12:c.G1774A:p.G592R,PRKD1:NM_001330069:exon13:c.G1798A:p.G600R,PRKD1:NM_001348390:exon13:c.G1510A:p.G504R	.	.	.	.	.	.	.	.	.	.	.	.	.	.	.	.	.	.	.	.	.	.	Pathogenic	CONGENITAL_HEART_DEFECTS_AND_ECTODERMAL_DYSPLASIA	RCV000417214.1	MedGen:OMIM
5587	14q12	14	30107911	30107911	A	C	A>C	PRKD1	exonic	nonsynonymous SNV	DDD4K.02175	DDD_2017	28135719	4293	0	exome	Developmental Delay (DD)	psychiatric disorder	validated	.	non-ssc	.	PRKD1:NM_002742:exon5:c.T896G:p.L299W,PRKD1:NM_001330069:exon6:c.T920G:p.L307W,PRKD1:NM_001348390:exon6:c.T632G:p.L211W	.	.	.	.	.	.	.	.	.	.	.	.	.	.	.	.	.	.	.	.	.	.	Pathogenic	CONGENITAL_HEART_DEFECTS_AND_ECTODERMAL_DYSPLASIA	RCV000417210.1	MedGen:OMIM
64067	14q13.1	14	34243631	34243631	T	C	T>C	NPAS3	exonic	nonsynonymous SNV	DDD4K.02712	DDD_2017	28135719	4293	0	exome	Developmental Delay (DD)	psychiatric disorder	validated	.	non-ssc	.	NPAS3:NM_001165893:exon7:c.T851C:p.V284A,NPAS3:NM_022123:exon7:c.T845C:p.V282A,NPAS3:NM_001164749:exon8:c.T941C:p.V314A,NPAS3:NM_173159:exon8:c.T902C:p.V301A	.	.	.	.	.	.	.	.	.	.	.	.	.	.	.	.	.	.	.	.	.	.	.	.	.	.
7080	14q13.3	14	36987163	36987163	G	C	G>C	NKX2-1	exonic	nonsynonymous SNV	DDD4K.01718	DDD_2017	28135719	4293	0	exome	Developmental Delay (DD)	psychiatric disorder	validated	.	non-ssc	.	NKX2-1:NM_003317:exon2:c.C436G:p.L146V,NKX2-1:NM_001079668:exon3:c.C526G:p.L176V	.	.	.	.	.	.	.	.	.	.	.	.	.	.	.	.	.	.	.	.	.	.	.	.	.	.
4253	14q21.1	14	39716977	39716977	G	A	G>A	MIA2	exonic	nonsynonymous SNV	DDD4K.04283	DDD_2017	28135719	4293	0	exome	Developmental Delay (DD)	psychiatric disorder	validated	.	non-ssc	.	MIA2:NM_001329214:exon4:c.G1199A:p.R400K,MIA2:NM_054024:exon4:c.G1199A:p.R400K	.	.	.	.	.	.	.	.	.	.	.	.	.	.	.	.	.	.	.	.	.	.	.	.	.	.
114088	14q22.1	14	51561429	51561429	C	T	C>T	TRIM9	exonic	nonsynonymous SNV	DDD4K.02389	DDD_2017	28135719	4293	0	exome	Developmental Delay (DD)	psychiatric disorder	validated	.	non-ssc	.	TRIM9:NM_015163:exon1:c.G229A:p.G77S,TRIM9:NM_052978:exon1:c.G229A:p.G77S	.	.	.	.	.	.	.	.	.	.	.	.	.	.	.	.	.	.	.	.	.	.	.	.	.	.
81537	14q23.2	14	64153202	64153202	C	T	C>T	SGPP1	exonic	nonsynonymous SNV	DDD4K.00936	DDD_2017	28135719	4293	0	exome	Developmental Delay (DD)	psychiatric disorder	validated	.	non-ssc	.	SGPP1:NM_030791:exon3:c.G947A:p.R316Q	.	.	.	.	.	.	.	.	.	.	.	.	.	.	.	.	.	.	.	.	.	.	.	.	.	.
22890	14q23.3	14	64989628	64989628	G	A	G>A	ZBTB1	exonic	nonsynonymous SNV	DDD4K.02952	DDD_2017	28135719	4293	0	exome	Developmental Delay (DD)	psychiatric disorder	validated	.	non-ssc	.	ZBTB1:NM_001123329:exon2:c.G1406A:p.R469Q,ZBTB1:NM_014950:exon2:c.G1406A:p.R469Q	.	.	.	.	.	.	.	.	.	.	.	.	.	.	0.0001	0.0002	.	.	.	rs143630259	COSM4848577;COSM4848576	1(cervix)	.	.	.	.
87	14q24.1	14	69369261	69369261	C	T	C>T	ACTN1	exonic	nonsynonymous SNV	DDD4K.04137	DDD_2017	28135719	4293	0	exome	Developmental Delay (DD)	psychiatric disorder	validated	.	non-ssc	.	ACTN1:NM_001102:exon8:c.G695A:p.R232Q,ACTN1:NM_001130004:exon8:c.G695A:p.R232Q,ACTN1:NM_001130005:exon8:c.G695A:p.R232Q	.	.	.	.	.	.	.	.	.	.	.	.	.	.	.	.	.	.	.	rs868325000	.	.	.	.	.	.
4293	14q24.2	14	71197366	71197366	G	A	G>A	MAP3K9	exonic	nonsynonymous SNV	DDD4K.04255	DDD_2017	28135719	4293	0	exome	Developmental Delay (DD)	psychiatric disorder	validated	.	non-ssc	.	MAP3K9:NM_001284232:exon11:c.C2245T:p.R749C,MAP3K9:NM_001284230:exon12:c.C3046T:p.R1016C,MAP3K9:NM_001284231:exon12:c.C2374T:p.R792C,MAP3K9:NM_033141:exon13:c.C3088T:p.R1030C	0.0002	.	.	.	0.001	.	0.0001	9.66e-05	0.0003	0	0.0002	0.0001	0	0	0.0001	.	0.0001	.	.	rs201827381	COSM1370854	1(skin);1(large_intestine)	.	.	.	.
57156	14q24.3	14	77709263	77709263	G	A	G>A	TMEM63C	exonic	nonsynonymous SNV	DDD4K.03663	DDD_2017	28135719	4293	0	exome	Developmental Delay (DD)	psychiatric disorder	validated	.	non-ssc	.	TMEM63C:NM_020431:exon15:c.G1205A:p.R402H	.	.	.	.	.	.	.	.	.	.	.	.	.	.	.	.	.	.	.	rs767018865	.	.	.	.	.	.
55671	14q32.12	14	91931692	91931692	A	C	A>C	PPP4R3A	exonic	nonsynonymous SNV	DDD4K.02035	DDD_2017	28135719	4293	0	exome	Developmental Delay (DD)	psychiatric disorder	validated	.	non-ssc	.	PPP4R3A:NM_001284281:exon9:c.T1015G:p.F339V,PPP4R3A:NM_001284280:exon11:c.T1693G:p.F565V	.	.	.	.	.	.	.	.	.	.	.	.	.	.	.	.	.	.	.	.	.	.	.	.	.	.
9950	14q32.12	14	93264305	93264305	T	G	T>G	GOLGA5	exonic	nonsynonymous SNV	DDD4K.02741	DDD_2017	28135719	4293	0	exome	Developmental Delay (DD)	psychiatric disorder	validated	.	non-ssc	.	GOLGA5:NM_005113:exon2:c.T523G:p.S175A	.	.	.	.	.	.	.	.	.	.	.	.	.	.	.	.	.	.	.	.	.	.	.	.	.	.
9950	14q32.12	14	93273276	93273276	C	T	C>T	GOLGA5	exonic	nonsynonymous SNV	DDD4K.00923	DDD_2017	28135719	4293	0	exome	Developmental Delay (DD)	psychiatric disorder	validated	.	non-ssc	.	GOLGA5:NM_005113:exon3:c.C740T:p.S247L	0.0002	.	.	.	.	0.001	8.24e-05	0.0003	0	0	0	0	0	0.0004	0.0001	0.0002	.	.	.	rs150641129	COSM5980664	1(upper_aerodigestive_tract)	.	.	.	.
1778	14q32.31	14	102461359	102461359	C	T	C>T	DYNC1H1	exonic	nonsynonymous SNV	DDD4K.03172	DDD_2017	28135719	4293	0	exome	Developmental Delay (DD)	psychiatric disorder	validated	.	non-ssc	.	DYNC1H1:NM_001376:exon14:c.C3370T:p.H1124Y	.	.	.	.	.	.	.	.	.	.	.	.	.	.	.	.	.	.	.	.	.	.	Likely pathogenic	not_provided	RCV000236857.1	MedGen
1778	14q32.31	14	102466656	102466656	G	A	G>A	DYNC1H1	exonic	nonsynonymous SNV	DDD4K.03740	DDD_2017	28135719	4293	0	exome	Developmental Delay (DD)	psychiatric disorder	validated	.	non-ssc	.	DYNC1H1:NM_001376:exon18:c.G3994A:p.V1332I	.	.	.	.	.	.	.	.	.	.	.	.	.	.	.	.	.	.	.	.	.	.	.	.	.	.
1778	14q32.31	14	102469287	102469287	G	A	G>A	DYNC1H1	exonic	nonsynonymous SNV	DDD4K.01798	DDD_2017	28135719	4293	0	exome	Developmental Delay (DD)	psychiatric disorder	validated	.	non-ssc	.	DYNC1H1:NM_001376:exon23:c.G4868A:p.R1623Q	.	.	.	.	.	.	.	.	.	.	.	.	.	.	.	.	.	.	.	.	.	.	.	.	.	.
23241	14q32.33	14	105834449	105834449	G	A	G>A	PACS2	exonic	nonsynonymous SNV	DDD4K.00416	DDD_2017	28135719	4293	0	exome	Developmental Delay (DD)	psychiatric disorder	validated	.	non-ssc	.	PACS2:NM_001100913:exon6:c.G625A:p.E209K,PACS2:NM_001243127:exon6:c.G424A:p.E142K,PACS2:NM_015197:exon6:c.G625A:p.E209K	.	.	.	.	.	.	.	.	.	.	.	.	.	.	.	.	.	.	.	.	.	.	.	.	.	.
9112	14q32.33	14	105916456	105916456	C	G	C>G	MTA1	exonic	nonsynonymous SNV	DDD4K.03371	DDD_2017	28135719	4293	0	exome	Developmental Delay (DD)	psychiatric disorder	validated	.	non-ssc	.	MTA1:NM_001203258:exon5:c.C303G:p.H101Q,MTA1:NM_004689:exon5:c.C303G:p.H101Q	.	.	.	.	.	.	.	.	.	.	.	.	.	.	.	.	.	.	.	.	.	.	.	.	.	.
2562	15q12	15	26806242	26806242	A	G	A>G	GABRB3	exonic	nonsynonymous SNV	DDD4K.01140	DDD_2017	28135719	4293	0	exome	Developmental Delay (DD)	psychiatric disorder	validated	.	non-ssc	.	GABRB3:NM_001191320:exon6:c.T662C:p.I221T,GABRB3:NM_001191321:exon6:c.T704C:p.I235T,GABRB3:NM_000814:exon8:c.T917C:p.I306T,GABRB3:NM_021912:exon8:c.T917C:p.I306T,GABRB3:NM_001278631:exon9:c.T662C:p.I221T	.	.	.	.	.	.	.	.	.	.	.	.	.	.	.	.	.	.	.	.	.	.	.	.	.	.
70	15q14	15	35085667	35085667	A	T	A>T	ACTC1	exonic	nonsynonymous SNV	DDD4K.01933	DDD_2017	28135719	4293	0	exome	Developmental Delay (DD)	psychiatric disorder	validated	.	non-ssc	.	ACTC1:NM_005159:exon3:c.T233A:p.I78N	.	.	.	.	.	.	.	.	.	.	.	.	.	.	.	.	.	.	.	.	.	.	.	.	.	.
145942	15q14	15	38243331	38243331	G	A	G>A	TMCO5A	exonic	nonsynonymous SNV	DDD4K.03837	DDD_2017	28135719	4293	0	exome	Developmental Delay (DD)	psychiatric disorder	validated	.	non-ssc	.	TMCO5A:NM_152453:exon12:c.G763A:p.V255I	0.0002	.	.	0.001	.	.	4.13e-05	0	0	0.0001	0	3e-05	0	0.0001	0.0001	.	0.0001	.	.	rs199665571	.	.	.	.	.	.
10125	15q14	15	38808490	38808490	G	A	G>A	RASGRP1	exonic	nonsynonymous SNV	DDD4K.04244	DDD_2017	28135719	4293	0	exome	Developmental Delay (DD)	psychiatric disorder	validated	.	non-ssc	.	RASGRP1:NM_001128602:exon6:c.C583T:p.R195W,RASGRP1:NM_001306086:exon6:c.C583T:p.R195W,RASGRP1:NM_005739:exon6:c.C583T:p.R195W	.	.	.	.	.	.	.	.	.	.	.	.	.	.	.	.	.	.	.	.	.	.	.	.	.	.
5888	15q15.1	15	40990957	40990957	A	G	A>G	RAD51	exonic	nonsynonymous SNV	DDD4K.00027	DDD_2017	28135719	4293	0	exome	Developmental Delay (DD)	psychiatric disorder	validated	.	non-ssc	.	RAD51:NM_001164269:exon2:c.A1G:p.M1V,RAD51:NM_001164270:exon2:c.A1G:p.M1V,RAD51:NM_002875:exon2:c.A1G:p.M1V,RAD51:NM_133487:exon2:c.A1G:p.M1V	.	.	.	.	.	.	.	.	.	.	.	.	.	.	.	.	.	.	.	.	.	.	.	.	.	.
23005	15q15.1	15	42107466	42107466	G	A	G>A	MAPKBP1	exonic	nonsynonymous SNV	DDD4K.01255	DDD_2017	28135719	4293	0	exome	Developmental Delay (DD)	psychiatric disorder	validated	.	non-ssc	.	MAPKBP1:NM_001265611:exon11:c.G1180A:p.E394K,MAPKBP1:NM_014994:exon11:c.G1180A:p.E394K,MAPKBP1:NM_001128608:exon12:c.G1198A:p.E400K	.	.	.	.	.	.	.	.	.	.	.	.	.	.	.	.	.	.	.	.	.	.	.	.	.	.
2038	15q15.2	15	43499431	43499431	G	C	G>C	EPB42	exonic	nonsynonymous SNV	DDD4K.00095	DDD_2017	28135719	4293	0	exome	Developmental Delay (DD)	psychiatric disorder	validated	.	non-ssc	.	EPB42:NM_000119:exon9:c.C1374G:p.C458W,EPB42:NM_001114134:exon9:c.C1284G:p.C428W	.	.	.	.	.	.	.	.	.	.	.	.	.	.	.	.	.	.	.	.	.	.	.	.	.	.
9836	15q15.3	15	43620670	43620670	T	C	T>C	LCMT2	exonic	nonsynonymous SNV	DDD4K.00300	DDD_2017	28135719	4293	0	exome	Developmental Delay (DD)	psychiatric disorder	validated	.	non-ssc	.	LCMT2:NM_014793:exon1:c.A2018G:p.H673R	.	.	.	.	.	.	.	.	.	.	.	.	.	.	.	.	.	.	.	.	.	.	.	.	.	.
54822	15q21.2	15	50868116	50868116	C	A	C>A	TRPM7	exonic	nonsynonymous SNV	DDD4K.04156	DDD_2017	28135719	4293	0	exome	Developmental Delay (DD)	psychiatric disorder	validated	.	non-ssc	.	TRPM7:NM_001301212:exon32:c.G4616T:p.G1539V,TRPM7:NM_017672:exon32:c.G4619T:p.G1540V	.	.	.	.	.	.	.	.	.	.	.	.	.	.	.	.	.	.	.	.	.	.	.	.	.	.
54822	15q21.2	15	50923659	50923659	C	T	C>T	TRPM7	exonic	nonsynonymous SNV	DDD4K.00733	DDD_2017	28135719	4293	0	exome	Developmental Delay (DD)	psychiatric disorder	validated	.	non-ssc	.	TRPM7:NM_001301212:exon10:c.G1159A:p.E387K,TRPM7:NM_017672:exon10:c.G1159A:p.E387K	.	.	.	.	.	.	.	.	.	.	.	.	.	.	.	.	.	.	.	.	.	.	.	.	.	.
4643	15q22.2	15	59515291	59515291	C	T	C>T	MYO1E	exonic	nonsynonymous SNV	DDD4K.00936	DDD_2017	28135719	4293	0	exome	Developmental Delay (DD)	psychiatric disorder	validated	.	non-ssc	.	MYO1E:NM_004998:exon9:c.G877A:p.V293I	.	.	.	.	.	.	.	.	.	.	.	.	.	.	.	.	.	.	.	.	.	.	.	.	.	.
79856	15q22.31	15	64446598	64446598	A	G	A>G	SNX22	exonic	nonsynonymous SNV	DDD4K.02048	DDD_2017	28135719	4293	0	exome	Developmental Delay (DD)	psychiatric disorder	validated	.	non-ssc	.	SNX22:NM_024798:exon7:c.A473G:p.N158S	.	.	.	.	.	.	8.25e-06	9.63e-05	0	0	0	0	0	0	.	.	.	.	.	rs765823746	.	.	.	.	.	.
10845	15q22.31	15	65456511	65456511	C	T	C>T	CLPX	exonic	nonsynonymous SNV	DDD4K.04137	DDD_2017	28135719	4293	0	exome	Developmental Delay (DD)	psychiatric disorder	validated	.	non-ssc	.	CLPX:NM_006660:exon5:c.G529A:p.D177N	.	.	.	.	.	.	.	.	.	.	.	.	.	.	.	.	.	.	.	.	.	.	.	.	.	.
57722	15q22.31	15	65684546	65684546	C	T	C>T	IGDCC4	exonic	nonsynonymous SNV	DDD4K.01103	DDD_2017	28135719	4293	0	exome	Developmental Delay (DD)	psychiatric disorder	validated	.	non-ssc	.	IGDCC4:NM_020962:exon11:c.G2048A:p.R683H	.	.	.	.	.	.	9.22e-05	0	0.0003	0	0	0.0001	0	0	0.0001	.	0.0001	.	.	rs113522870	.	.	.	.	.	.
81556	15q22.31	15	65884011	65884011	T	A	T>A	INTS14	exonic	nonsynonymous SNV	DDD4K.01189	DDD_2017	28135719	4293	0	exome	Developmental Delay (DD)	psychiatric disorder	validated	.	non-ssc	.	INTS14:NM_001207059:exon8:c.A874T:p.M292L,INTS14:NM_001136043:exon9:c.A808T:p.M270L,INTS14:NM_001207058:exon9:c.A991T:p.M331L	.	.	.	.	.	.	.	.	.	.	.	.	.	.	.	.	.	.	.	.	.	.	.	.	.	.
8766	15q22.31	15	66161962	66161962	A	C	A>C	RAB11A	exonic	nonsynonymous SNV	DDD4K.02129	DDD_2017	28135719	4293	0	exome	Developmental Delay (DD)	psychiatric disorder	validated	.	non-ssc	.	RAB11A:NM_001206836:exon1:c.A39C:p.K13N,RAB11A:NM_004663:exon1:c.A39C:p.K13N	.	.	.	.	.	.	.	.	.	.	.	.	.	.	.	.	.	.	.	.	.	.	.	.	.	.
8766	15q22.31	15	66172039	66172039	C	T	C>T	RAB11A	exonic	nonsynonymous SNV	DDD4K.01126	DDD_2017	28135719	4293	0	exome	Developmental Delay (DD)	psychiatric disorder	validated	.	non-ssc	.	RAB11A:NM_004663:exon4:c.C461T:p.S154L	.	.	.	.	.	.	.	.	.	.	.	.	.	.	.	.	.	.	.	.	.	.	.	.	.	.
8766	15q22.31	15	66172039	66172039	C	T	C>T	RAB11A	exonic	nonsynonymous SNV	DDD4K.02511	DDD_2017	28135719	4293	0	exome	Developmental Delay (DD)	psychiatric disorder	validated	.	non-ssc	.	RAB11A:NM_004663:exon4:c.C461T:p.S154L	.	.	.	.	.	.	.	.	.	.	.	.	.	.	.	.	.	.	.	.	.	.	.	.	.	.
115752	15q22.31	15	66587373	66587373	T	C	T>C	DIS3L	exonic	nonsynonymous SNV	DDD4K.04221	DDD_2017	28135719	4293	0	exome	Developmental Delay (DD)	psychiatric disorder	validated	.	non-ssc	.	DIS3L:NM_001143688:exon2:c.T187C:p.W63R,DIS3L:NM_001323944:exon2:c.T136C:p.W46R,DIS3L:NM_001323948:exon2:c.T136C:p.W46R	.	.	.	.	.	.	.	.	.	.	.	.	.	.	.	.	.	.	.	.	.	.	.	.	.	.
5604	15q22.31	15	66777364	66777364	T	G	T>G	MAP2K1	exonic	nonsynonymous SNV	DDD4K.01701	DDD_2017	28135719	4293	0	exome	Developmental Delay (DD)	psychiatric disorder	validated	.	non-ssc	.	MAP2K1:NM_002755:exon7:c.T730G:p.S244A	.	.	.	.	.	.	.	.	.	.	.	.	.	.	.	.	.	.	.	rs730880507	.	.	Likely pathogenic	not_provided	RCV000158012.1	MedGen
79719	15q23	15	67529014	67529014	A	G	A>G	AAGAB	exonic	nonsynonymous SNV	DDD4K.03228	DDD_2017	28135719	4293	0	exome	Developmental Delay (DD)	psychiatric disorder	validated	.	non-ssc	.	AAGAB:NM_024666:exon2:c.T218C:p.I73T	.	.	.	.	.	.	.	.	.	.	.	.	.	.	.	.	.	.	.	.	.	.	.	.	.	.
91860	15q23	15	68497651	68497651	C	T	C>T	CALML4	exonic	nonsynonymous SNV	DDD4K.02193	DDD_2017	28135719	4293	0	exome	Developmental Delay (DD)	psychiatric disorder	validated	.	non-ssc	.	CALML4:NM_001031733:exon1:c.G64A:p.G22R,CALML4:NM_033429:exon1:c.G64A:p.G22R	.	.	.	.	.	.	.	.	.	.	.	.	.	.	.	.	.	.	.	.	.	.	.	.	.	.
55323	15q23	15	71125118	71125118	T	C	T>C	LARP6	exonic	nonsynonymous SNV	DDD4K.04086	DDD_2017	28135719	4293	0	exome	Developmental Delay (DD)	psychiatric disorder	validated	.	non-ssc	.	LARP6:NM_001286679:exon3:c.A197G:p.Y66C,LARP6:NM_018357:exon3:c.A749G:p.Y250C	.	.	.	.	.	.	8.45e-06	0	0	0	0	0	0	6.9e-05	.	.	.	.	.	rs772759891	.	.	.	.	.	.
5371	15q24.1	15	74315592	74315592	C	G	C>G	PML	exonic	nonsynonymous SNV	DDD4K.01025	DDD_2017	28135719	4293	0	exome	Developmental Delay (DD)	psychiatric disorder	validated	.	non-ssc	.	PML:NM_002675:exon3:c.C1026G:p.D342E,PML:NM_033238:exon3:c.C1026G:p.D342E,PML:NM_033239:exon3:c.C1026G:p.D342E,PML:NM_033240:exon3:c.C1026G:p.D342E,PML:NM_033244:exon3:c.C1026G:p.D342E,PML:NM_033246:exon3:c.C1026G:p.D342E,PML:NM_033247:exon3:c.C1026G:p.D342E,PML:NM_033249:exon3:c.C1026G:p.D342E,PML:NM_033250:exon3:c.C1026G:p.D342E	.	.	.	.	.	.	.	.	.	.	.	.	.	.	.	.	.	.	.	.	.	.	.	.	.	.
25942	15q24.2	15	75706642	75706642	G	A	G>A	SIN3A	exonic	nonsynonymous SNV	DDD4K.01122	DDD_2017	28135719	4293	0	exome	Developmental Delay (DD)	psychiatric disorder	validated	.	non-ssc	.	SIN3A:NM_001145357:exon4:c.C377T:p.A126V,SIN3A:NM_001145358:exon4:c.C377T:p.A126V,SIN3A:NM_015477:exon4:c.C377T:p.A126V	.	.	.	.	.	.	.	.	.	.	.	.	.	.	.	.	.	.	.	.	COSM195887	1(stomach);1(liver);1(prostate)	.	.	.	.
26263	15q24.2	15	76225210	76225210	G	A	G>A	FBXO22	exonic	nonsynonymous SNV	DDD4K.01172	DDD_2017	28135719	4293	0	exome	Developmental Delay (DD)	psychiatric disorder	validated	.	non-ssc	.	FBXO22:NM_147188:exon7:c.G979A:p.V327I	.	.	.	.	.	.	1.65e-05	0	0	0	0	3e-05	0	0	.	.	.	.	.	rs748391485	COSM965086	2(large_intestine);1(endometrium)	.	.	.	.
84894	15q24.3	15	77906592	77906592	C	T	C>T	LINGO1	exonic	nonsynonymous SNV	DDD4K.00067	DDD_2017	28135719	4293	0	exome	Developmental Delay (DD)	psychiatric disorder	validated	.	non-ssc	.	LINGO1:NM_032808:exon2:c.G1657A:p.D553N,LINGO1:NM_001301198:exon3:c.G1639A:p.D547N,LINGO1:NM_001301194:exon4:c.G1639A:p.D547N,LINGO1:NM_001301195:exon4:c.G1639A:p.D547N,LINGO1:NM_001301197:exon4:c.G1639A:p.D547N,LINGO1:NM_001301199:exon4:c.G1639A:p.D547N,LINGO1:NM_001301200:exon4:c.G1639A:p.D547N,LINGO1:NM_001301192:exon5:c.G1639A:p.D547N,LINGO1:NM_001301186:exon6:c.G1639A:p.D547N,LINGO1:NM_00130…	.	.	.	.	.	.	8.29e-06	0	0	0	0	1.5e-05	0	0	.	.	.	.	.	rs748164952	.	.	.	.	.	.
1106	15q26.1	15	93499821	93499821	C	T	C>T	CHD2	exonic	nonsynonymous SNV	DDD4K.00230	DDD_2017	28135719	4293	0	exome	Developmental Delay (DD)	psychiatric disorder	validated	.	non-ssc	.	CHD2:NM_001271:exon16:c.C1942T:p.P648S	.	.	.	.	.	.	.	.	.	.	.	.	.	.	.	.	.	.	.	rs864309539	.	.	Pathogenic	Epileptic_encephalopathy\x2c_childhood-onset	RCV000202635.1	MedGen:OMIM
79705	15q26.3	15	101588763	101588763	G	A	G>A	LRRK1	exonic	nonsynonymous SNV	DDD4K.02776	DDD_2017	28135719	4293	0	exome	Developmental Delay (DD)	psychiatric disorder	validated	.	non-ssc	.	LRRK1:NM_024652:exon22:c.G3200A:p.G1067E	.	.	.	.	.	.	.	.	.	.	.	.	.	.	.	.	.	.	.	.	.	.	.	.	.	.
64285	16p13.3	16	109814	109814	T	C	T>C	RHBDF1	exonic	nonsynonymous SNV	DDD4K.02564	DDD_2017	28135719	4293	0	exome	Developmental Delay (DD)	psychiatric disorder	validated	.	non-ssc	.	RHBDF1:NM_022450:exon14:c.A1733G:p.K578R	.	.	.	.	.	.	.	.	.	.	.	.	.	.	.	.	.	.	.	.	.	.	.	.	.	.
10607	16p13.3	16	2024199	2024199	T	G	T>G	TBL3	exonic	nonsynonymous SNV	DDD4K.02864	DDD_2017	28135719	4293	0	exome	Developmental Delay (DD)	psychiatric disorder	validated	.	non-ssc	.	TBL3:NM_006453:exon3:c.T95G:p.L32R	.	.	.	.	.	.	.	.	.	.	.	.	.	.	.	.	.	.	.	.	.	.	.	.	.	.
5310	16p13.3	16	2140728	2140728	C	T	C>T	PKD1	exonic	nonsynonymous SNV	DDD4K.01813	DDD_2017	28135719	4293	0	exome	Developmental Delay (DD)	psychiatric disorder	validated	.	non-ssc	.	PKD1:NM_000296:exon44:c.G12082A:p.V4028I,PKD1:NM_001009944:exon44:c.G12085A:p.V4029I	.	.	.	.	.	.	8.56e-06	0	0	0	0	1.57e-05	0	0	.	.	.	.	.	rs781278135	.	.	.	.	.	.
4993	16p13.3	16	3406481	3406481	G	A	G>A	OR2C1	exonic	nonsynonymous SNV	DDD4K.04121	DDD_2017	28135719	4293	0	exome	Developmental Delay (DD)	psychiatric disorder	validated	.	non-ssc	.	OR2C1:NM_012368:exon1:c.G541A:p.V181M	.	.	.	.	.	.	8.24e-06	0	0	0	0	1.5e-05	0	0	.	.	.	.	.	rs766354189	COSM1708679	1(skin)	.	.	.	.
1387	16p13.3	16	3828173	3828173	T	C	T>C	CREBBP	exonic	nonsynonymous SNV	DDD4K.03154	DDD_2017	28135719	4293	0	exome	Developmental Delay (DD)	psychiatric disorder	validated	.	non-ssc	.	CREBBP:NM_001079846:exon9:c.A1838G:p.Y613C,CREBBP:NM_004380:exon10:c.A1952G:p.Y651C	.	.	.	.	.	.	.	.	.	.	.	.	.	.	.	.	.	.	.	.	.	.	.	.	.	.
80063	16p13.13	16	10574807	10574807	C	G	C>G	ATF7IP2	exonic	nonsynonymous SNV	DDD4K.03219	DDD_2017	28135719	4293	0	exome	Developmental Delay (DD)	psychiatric disorder	validated	.	non-ssc	.	ATF7IP2:NM_001256160:exon11:c.C1554G:p.H518Q,ATF7IP2:NM_024997:exon11:c.C1621G:p.Q541E	.	.	.	.	.	.	.	.	.	.	.	.	.	.	.	.	.	.	.	.	.	.	.	.	.	.
146279	16p13.13	16	10775953	10775953	C	T	C>T	TEKT5	exonic	nonsynonymous SNV	DDD4K.01554	DDD_2017	28135719	4293	0	exome	Developmental Delay (DD)	psychiatric disorder	validated	.	non-ssc	.	TEKT5:NM_144674:exon4:c.G760A:p.E254K	.	.	.	.	.	.	4.12e-05	0	0	0.0001	0	3e-05	0	0.0001	.	.	.	.	.	rs761518800	COSM3505717	1(skin);1(large_intestine)	.	.	.	.
26156	16p13.13	16	11933670	11933670	T	C	T>C	RSL1D1	exonic	nonsynonymous SNV	DDD4K.04131	DDD_2017	28135719	4293	0	exome	Developmental Delay (DD)	psychiatric disorder	validated	.	non-ssc	.	RSL1D1:NM_015659:exon8:c.A1028G:p.H343R	.	.	.	.	.	.	.	.	.	.	.	.	.	.	.	.	.	.	.	.	.	.	.	.	.	.
64131	16p12.3	16	17221551	17221551	C	G	C>G	XYLT1	exonic	nonsynonymous SNV	DDD4K.02600	DDD_2017	28135719	4293	0	exome	Developmental Delay (DD)	psychiatric disorder	validated	.	non-ssc	.	XYLT1:NM_022166:exon10:c.G2195C:p.S732T	.	.	.	.	.	.	.	.	.	.	.	.	.	.	.	.	.	.	.	.	.	.	.	.	.	.
10368	16p12.1	16	24372936	24372936	C	T	C>T	CACNG3	exonic	nonsynonymous SNV	DDD4K.03556	DDD_2017	28135719	4293	0	exome	Developmental Delay (DD)	psychiatric disorder	validated	.	non-ssc	.	CACNG3:NM_006539:exon4:c.C700T:p.R234W	.	.	.	.	.	.	8.25e-06	0	0	0.0001	0	0	0	0	.	.	.	.	.	rs764770670	.	.	.	.	.	.
5930	16p12.1	16	24580172	24580172	C	T	C>T	RBBP6	exonic	nonsynonymous SNV	DDD4K.00876	DDD_2017	28135719	4293	0	exome	Developmental Delay (DD)	psychiatric disorder	validated	.	non-ssc	.	RBBP6:NM_018703:exon16:c.C2059T:p.R687C,RBBP6:NM_006910:exon17:c.C2161T:p.R721C	.	.	.	.	.	.	.	.	.	.	.	.	.	.	.	.	.	.	.	.	.	.	.	.	.	.
27327	16p12.1	16	24802476	24802476	G	A	G>A	TNRC6A	exonic	nonsynonymous SNV	DDD4K.03538	DDD_2017	28135719	4293	0	exome	Developmental Delay (DD)	psychiatric disorder	validated	.	non-ssc	.	TNRC6A:NM_001330520:exon6:c.G2513A:p.G838E,TNRC6A:NM_014494:exon6:c.G2513A:p.G838E	.	.	.	.	.	.	8.28e-06	0	0	0	0	1.51e-05	0	0	.	.	.	.	.	rs756113736	.	.	.	.	.	.
11273	16p11.2	16	28847422	28847422	C	T	C>T	ATXN2L	exonic	nonsynonymous SNV	DDD4K.03805	DDD_2017	28135719	4293	0	exome	Developmental Delay (DD)	psychiatric disorder	validated	.	non-ssc	.	ATXN2L:NM_001308230:exon22:c.C3082T:p.P1028S,ATXN2L:NM_007245:exon22:c.C3064T:p.P1022S,ATXN2L:NM_017492:exon22:c.C3064T:p.P1022S,ATXN2L:NM_145714:exon22:c.C3064T:p.P1022S,ATXN2L:NM_148414:exon22:c.C3064T:p.P1022S,ATXN2L:NM_148415:exon22:c.C3064T:p.P1022S,ATXN2L:NM_148416:exon22:c.C3064T:p.P1022S	.	.	.	.	.	.	2.5e-05	0	0	0	0	4.56e-05	0	0	.	.	.	.	.	rs778715582	.	.	.	.	.	.
10847	16p11.2	16	30718647	30718647	C	G	C>G	SRCAP	exonic	nonsynonymous SNV	DDD4K.00301	DDD_2017	28135719	4293	0	exome	Developmental Delay (DD)	psychiatric disorder	validated	.	non-ssc	.	SRCAP:NM_006662:exon5:c.C450G:p.D150E	.	.	.	.	.	.	.	.	.	.	.	.	.	.	.	.	.	.	.	.	.	.	.	.	.	.
54620	16p11.2	16	30937218	30937218	T	A	T>A	FBXL19	exonic	nonsynonymous SNV	DDD4K.00892	DDD_2017	28135719	4293	0	exome	Developmental Delay (DD)	psychiatric disorder	validated	.	non-ssc	.	FBXL19:NM_001099784:exon2:c.T203A:p.M68K	.	.	.	.	.	.	.	.	.	.	.	.	.	.	.	.	.	.	.	.	.	.	.	.	.	.
9683	16q12.1	16	48594959	48594959	G	T	G>T	N4BP1	exonic	nonsynonymous SNV	DDD4K.03002	DDD_2017	28135719	4293	0	exome	Developmental Delay (DD)	psychiatric disorder	validated	.	non-ssc	.	N4BP1:NM_153029:exon2:c.C1595A:p.P532H	.	.	.	.	.	.	.	.	.	.	.	.	.	.	.	.	.	.	.	.	.	.	.	.	.	.
2775	16q12.2	16	56309901	56309901	T	G	T>G	GNAO1	exonic	nonsynonymous SNV	DDD4K.00921	DDD_2017	28135719	4293	0	exome	Developmental Delay (DD)	psychiatric disorder	validated	.	non-ssc	.	GNAO1:NM_020988:exon3:c.T220G:p.Y74D,GNAO1:NM_138736:exon3:c.T220G:p.Y74D	.	.	.	.	.	.	.	.	.	.	.	.	.	.	.	.	.	.	.	.	.	.	.	.	.	.
23019	16q21	16	58555172	58555172	G	A	G>A	CNOT1	exonic	nonsynonymous SNV	DDD4K.01068	DDD_2017	28135719	4293	0	exome	Developmental Delay (DD)	psychiatric disorder	validated	.	non-ssc	.	CNOT1:NM_001265612:exon48:c.C6952T:p.L2318F,CNOT1:NM_016284:exon48:c.C6967T:p.L2323F	.	.	.	.	.	.	.	.	.	.	.	.	.	.	.	.	.	.	.	.	.	.	.	.	.	.
10664	16q22.1	16	67654615	67654615	C	T	C>T	CTCF	exonic	nonsynonymous SNV	DDD4K.00342	DDD_2017	28135719	4293	0	exome	Developmental Delay (DD)	psychiatric disorder	validated	.	non-ssc	.	CTCF:NM_001191022:exon4:c.C118T:p.R40C,CTCF:NM_006565:exon6:c.C1102T:p.R368C	.	.	.	.	.	.	.	.	.	.	.	.	.	.	.	.	.	.	.	.	COSM1378950	1(large_intestine)	.	.	.	.
10664	16q22.1	16	67654646	67654646	C	T	C>T	CTCF	exonic	nonsynonymous SNV	DDD4K.01412	DDD_2017	28135719	4293	0	exome	Developmental Delay (DD)	psychiatric disorder	validated	.	non-ssc	.	CTCF:NM_001191022:exon4:c.C149T:p.P50L,CTCF:NM_006565:exon6:c.C1133T:p.P378L	.	.	.	.	.	.	.	.	.	.	.	.	.	.	.	.	.	.	.	.	COSM972488	1(haematopoietic_and_lymphoid_tissue);2(endometrium)	.	.	.	.
81577	16q22.1	16	67709429	67709429	G	A	G>A	GFOD2	exonic	nonsynonymous SNV	DDD4K.03709	DDD_2017	28135719	4293	0	exome	Developmental Delay (DD)	psychiatric disorder	validated	.	non-ssc	.	GFOD2:NM_030819:exon3:c.C787T:p.R263W	.	.	.	.	.	.	2.49e-05	0	0	0	0	4.53e-05	0	0	.	.	.	.	.	rs757571477	.	.	.	.	.	.
10725	16q22.1	16	69703950	69703950	A	T	A>T	NFAT5	exonic	nonsynonymous SNV	DDD4K.00388	DDD_2017	28135719	4293	0	exome	Developmental Delay (DD)	psychiatric disorder	validated	.	non-ssc	.	NFAT5:NM_006599:exon7:c.A1386T:p.E462D,NFAT5:NM_001113178:exon8:c.A1440T:p.E480D,NFAT5:NM_138713:exon8:c.A1440T:p.E480D,NFAT5:NM_173214:exon8:c.A1158T:p.E386D,NFAT5:NM_173215:exon8:c.A1158T:p.E386D,NFAT5:NM_138714:exon9:c.A1158T:p.E386D	.	.	.	.	.	.	.	.	.	.	.	.	.	.	.	.	.	.	.	.	.	.	.	.	.	.
463	16q22.2	16	72827588	72827588	C	T	C>T	ZFHX3	exonic	nonsynonymous SNV	DDD4K.00519	DDD_2017	28135719	4293	0	exome	Developmental Delay (DD)	psychiatric disorder	validated	.	non-ssc	.	ZFHX3:NM_001164766:exon8:c.G6251A:p.R2084Q,ZFHX3:NM_006885:exon9:c.G8993A:p.R2998Q	.	.	.	.	.	.	.	.	.	.	.	.	.	.	.	.	.	.	.	.	COSM1128886	1(prostate)	.	.	.	.
1504	16q23.1	16	75258660	75258660	A	G	A>G	CTRB1	exonic	nonsynonymous SNV	DDD4K.00821	DDD_2017	28135719	4293	0	exome	Developmental Delay (DD)	psychiatric disorder	validated	.	non-ssc	.	CTRB1:NM_001329190:exon6:c.A554G:p.H185R,CTRB1:NM_001906:exon7:c.A688G:p.I230V	0.0002	.	.	.	0.001	.	.	.	.	.	.	.	.	.	.	.	.	.	.	rs200547634	.	.	.	.	.	.
85445	16q23.1	16	76528939	76528939	A	G	A>G	CNTNAP4	exonic	nonsynonymous SNV	DDD4K.03753	DDD_2017	28135719	4293	0	exome	Developmental Delay (DD)	psychiatric disorder	validated	.	non-ssc	.	CNTNAP4:NM_001322180:exon13:c.A1826G:p.N609S,CNTNAP4:NM_001322191:exon13:c.A1286G:p.N429S,CNTNAP4:NM_138994:exon13:c.A1994G:p.N665S,CNTNAP4:NM_001322187:exon15:c.A797G:p.N266S,CNTNAP4:NM_001322189:exon15:c.A1949G:p.N650S	.	.	.	.	.	.	1.65e-05	0	0	0	0	1.5e-05	0	6.06e-05	.	.	.	.	.	rs760241728	.	.	.	.	.	.
124359	16q23.2	16	80654735	80654735	A	G	A>G	CDYL2	exonic	nonsynonymous SNV	DDD4K.00310	DDD_2017	28135719	4293	0	exome	Developmental Delay (DD)	psychiatric disorder	validated	.	non-ssc	.	CDYL2:NM_152342:exon4:c.T932C:p.L311P	.	.	.	.	.	.	.	.	.	.	.	.	.	.	.	.	.	.	.	.	.	.	.	.	.	.
23199	16q24.1	16	85682280	85682280	G	A	G>A	GSE1	exonic	nonsynonymous SNV	DDD4K.03943	DDD_2017	28135719	4293	0	exome	Developmental Delay (DD)	psychiatric disorder	validated	.	non-ssc	.	GSE1:NM_001134473:exon2:c.G37A:p.V13M,GSE1:NM_001278184:exon2:c.G130A:p.V44M,GSE1:NM_014615:exon3:c.G349A:p.V117M	.	.	.	.	.	.	2.53e-05	9.81e-05	0	0	0	3.07e-05	0	0	.	.	.	.	.	rs769272935	.	.	.	.	.	.
10594	17p13.3	17	1560022	1560022	C	T	C>T	PRPF8	exonic	nonsynonymous SNV	DDD4K.04224	DDD_2017	28135719	4293	0	exome	Developmental Delay (DD)	psychiatric disorder	validated	.	non-ssc	.	PRPF8:NM_006445:exon35:c.G5539A:p.A1847T	.	.	.	.	.	.	.	.	.	.	.	.	.	.	.	.	.	.	.	.	COSM178201	1(endometrium)	.	.	.	.
5048	17p13.3	17	2577455	2577455	T	A	T>A	PAFAH1B1	exonic	nonsynonymous SNV	DDD4K.03006	DDD_2017	28135719	4293	0	exome	Developmental Delay (DD)	psychiatric disorder	validated	.	non-ssc	.	PAFAH1B1:NM_000430:exon8:c.T773A:p.V258E	.	.	.	.	.	.	.	.	.	.	.	.	.	.	.	.	.	.	.	.	.	.	.	.	.	.
342527	17p13.2	17	4500579	4500579	A	C	A>C	SMTNL2	exonic	nonsynonymous SNV	DDD4K.03944	DDD_2017	28135719	4293	0	exome	Developmental Delay (DD)	psychiatric disorder	validated	.	non-ssc	.	SMTNL2:NM_001114974:exon7:c.A1220C:p.Q407P,SMTNL2:NM_198501:exon7:c.A788C:p.Q263P	.	.	.	.	.	.	.	.	.	.	.	.	.	.	.	.	.	.	.	.	.	.	.	.	.	.
409	17p13.2	17	4623588	4623588	G	A	G>A	ARRB2	exonic	nonsynonymous SNV	DDD4K.01586	DDD_2017	28135719	4293	0	exome	Developmental Delay (DD)	psychiatric disorder	validated	.	non-ssc	.	ARRB2:NM_001330064:exon10:c.G419A:p.R140Q,ARRB2:NM_001257331:exon11:c.G950A:p.R317Q,ARRB2:NM_199004:exon11:c.G950A:p.R317Q,ARRB2:NM_001257328:exon12:c.G1058A:p.R353Q,ARRB2:NM_001257330:exon12:c.G995A:p.R332Q,ARRB2:NM_004313:exon12:c.G995A:p.R332Q	.	.	.	.	.	.	.	.	.	.	.	.	.	.	.	.	.	.	.	.	.	.	.	.	.	.
1107	17p13.1	17	7800459	7800459	A	G	A>G	CHD3	exonic	nonsynonymous SNV	DDD4K.02352	DDD_2017	28135719	4293	0	exome	Developmental Delay (DD)	psychiatric disorder	validated	.	non-ssc	.	CHD3:NM_001005271:exon11:c.A1943G:p.E648G,CHD3:NM_001005273:exon11:c.A1766G:p.E589G,CHD3:NM_005852:exon11:c.A1766G:p.E589G	.	.	.	.	.	.	.	.	.	.	.	.	.	.	.	.	.	.	.	.	.	.	.	.	.	.
1107	17p13.1	17	7804024	7804024	C	T	C>T	CHD3	exonic	nonsynonymous SNV	DDD4K.03643	DDD_2017	28135719	4293	0	exome	Developmental Delay (DD)	psychiatric disorder	validated	.	non-ssc	.	CHD3:NM_001005271:exon18:c.C3130T:p.R1044W,CHD3:NM_001005273:exon18:c.C2953T:p.R985W,CHD3:NM_005852:exon18:c.C2953T:p.R985W	.	.	.	.	.	.	.	.	.	.	.	.	.	.	.	.	.	.	.	.	.	.	.	.	.	.
1107	17p13.1	17	7804025	7804025	G	C	G>C	CHD3	exonic	nonsynonymous SNV	DDD4K.03139	DDD_2017	28135719	4293	0	exome	Developmental Delay (DD)	psychiatric disorder	validated	.	non-ssc	.	CHD3:NM_001005271:exon18:c.G3131C:p.R1044P,CHD3:NM_001005273:exon18:c.G2954C:p.R985P,CHD3:NM_005852:exon18:c.G2954C:p.R985P	.	.	.	.	.	.	.	.	.	.	.	.	.	.	.	.	.	.	.	.	.	.	.	.	.	.
1107	17p13.1	17	7806037	7806037	G	C	G>C	CHD3	exonic	nonsynonymous SNV	DDD4K.03530	DDD_2017	28135719	4293	0	exome	Developmental Delay (DD)	psychiatric disorder	validated	.	non-ssc	.	CHD3:NM_001005271:exon21:c.G3539C:p.R1180P,CHD3:NM_001005273:exon21:c.G3362C:p.R1121P,CHD3:NM_005852:exon21:c.G3362C:p.R1121P	.	.	.	.	.	.	.	.	.	.	.	.	.	.	.	.	.	.	.	.	.	.	.	.	.	.
1107	17p13.1	17	7806288	7806288	C	T	C>T	CHD3	exonic	nonsynonymous SNV	DDD4K.03473	DDD_2017	28135719	4293	0	exome	Developmental Delay (DD)	psychiatric disorder	validated	.	non-ssc	.	CHD3:NM_001005271:exon22:c.C3581T:p.S1194F,CHD3:NM_001005273:exon22:c.C3404T:p.S1135F,CHD3:NM_005852:exon22:c.C3404T:p.S1135F	.	.	.	.	.	.	.	.	.	.	.	.	.	.	.	.	.	.	.	.	.	.	.	.	.	.
1107	17p13.1	17	7806599	7806599	C	T	C>T	CHD3	exonic	nonsynonymous SNV	DDD4K.00324	DDD_2017	28135719	4293	0	exome	Developmental Delay (DD)	psychiatric disorder	validated	.	non-ssc	.	CHD3:NM_001005271:exon23:c.C3682T:p.R1228W,CHD3:NM_001005273:exon23:c.C3505T:p.R1169W,CHD3:NM_005852:exon23:c.C3505T:p.R1169W	.	.	.	.	.	.	.	.	.	.	.	.	.	.	.	.	.	.	.	.	.	.	.	.	.	.
1107	17p13.1	17	7806609	7806609	G	A	G>A	CHD3	exonic	nonsynonymous SNV	DDD4K.02763	DDD_2017	28135719	4293	0	exome	Developmental Delay (DD)	psychiatric disorder	validated	.	non-ssc	.	CHD3:NM_001005271:exon23:c.G3692A:p.R1231Q,CHD3:NM_001005273:exon23:c.G3515A:p.R1172Q,CHD3:NM_005852:exon23:c.G3515A:p.R1172Q	.	.	.	.	.	.	.	.	.	.	.	.	.	.	.	.	.	.	.	.	.	.	.	.	.	.
80169	17p13.1	17	8139190	8139190	G	A	G>A	CTC1	exonic	nonsynonymous SNV	DDD4K.00124	DDD_2017	28135719	4293	0	exome	Developmental Delay (DD)	psychiatric disorder	validated	.	non-ssc	.	CTC1:NM_025099:exon7:c.C1165T:p.R389C	.	.	.	.	.	.	8.32e-06	0	0	0.0001	0	0	0	0	.	.	.	.	.	rs780333162	.	.	.	.	.	.
80169	17p13.1	17	8141458	8141458	C	G	C>G	CTC1	exonic	nonsynonymous SNV	DDD4K.04259	DDD_2017	28135719	4293	0	exome	Developmental Delay (DD)	psychiatric disorder	validated	.	non-ssc	.	CTC1:NM_025099:exon4:c.G538C:p.E180Q	.	.	.	.	.	.	.	.	.	.	.	.	.	.	.	.	.	.	.	.	.	.	.	.	.	.
4621	17p13.1	17	10535794	10535794	T	C	T>C	MYH3	exonic	nonsynonymous SNV	DDD4K.00611	DDD_2017	28135719	4293	0	exome	Developmental Delay (DD)	psychiatric disorder	validated	.	non-ssc	.	MYH3:NM_002470:exon34:c.A4955G:p.K1652R	.	.	.	.	.	.	.	.	.	.	.	.	.	.	.	.	.	.	.	.	.	.	.	.	.	.
9611	17p12	17	15995345	15995345	T	C	T>C	NCOR1	exonic	nonsynonymous SNV	DDD4K.02693	DDD_2017	28135719	4293	0	exome	Developmental Delay (DD)	psychiatric disorder	validated	.	non-ssc	.	NCOR1:NM_001190438:exon19:c.A2569G:p.I857V,NCOR1:NM_001190440:exon21:c.A2896G:p.I966V,NCOR1:NM_006311:exon22:c.A2848G:p.I950V	.	.	.	.	.	.	8.24e-06	0	0	0.0001	0	0	0	0	0.0001	0.0002	.	.	.	rs367874483	.	.	.	.	.	.
10743	17p11.2	17	17697733	17697733	G	A	G>A	RAI1	exonic	nonsynonymous SNV	DDD4K.02414	DDD_2017	28135719	4293	0	exome	Developmental Delay (DD)	psychiatric disorder	validated	.	non-ssc	.	RAI1:NM_030665:exon3:c.G1471A:p.E491K	.	.	.	.	.	.	.	.	.	.	.	.	.	.	.	.	.	.	.	rs527757515	COSM4809242;COSM4809241	1(pancreas)	.	.	.	.
23098	17q11.2	17	26708667	26708667	G	C	G>C	SARM1	exonic	nonsynonymous SNV	DDD4K.00266	DDD_2017	28135719	4293	0	exome	Developmental Delay (DD)	psychiatric disorder	validated	.	non-ssc	.	SARM1:NM_015077:exon6:c.G913C:p.G305R	.	.	.	.	.	.	.	.	.	.	.	.	.	.	.	.	.	.	.	.	.	.	.	.	.	.
6830	17q11.2	17	27005584	27005584	C	G	C>G	SUPT6H	exonic	nonsynonymous SNV	DDD4K.03894	DDD_2017	28135719	4293	0	exome	Developmental Delay (DD)	psychiatric disorder	validated	.	non-ssc	.	SUPT6H:NM_003170:exon10:c.C1138G:p.R380G,SUPT6H:NM_001320755:exon11:c.C1138G:p.R380G	.	.	.	.	.	.	.	.	.	.	.	.	.	.	.	.	.	.	.	.	.	.	.	.	.	.
57649	17q11.2	17	27233444	27233444	G	C	G>C	PHF12	exonic	nonsynonymous SNV	DDD4K.02877	DDD_2017	28135719	4293	0	exome	Developmental Delay (DD)	psychiatric disorder	validated	.	non-ssc	.	PHF12:NM_001033561:exon15:c.C2772G:p.C924W	.	.	.	.	.	.	.	.	.	.	.	.	.	.	.	.	.	.	.	.	.	.	.	.	.	.
85464	17q11.2	17	27963096	27963096	C	T	C>T	SSH2	exonic	nonsynonymous SNV	DDD4K.01665	DDD_2017	28135719	4293	0	exome	Developmental Delay (DD)	psychiatric disorder	validated	.	non-ssc	.	SSH2:NM_033389:exon14:c.G2071A:p.V691M,SSH2:NM_001282129:exon15:c.G2152A:p.V718M	.	.	.	.	.	.	.	.	.	.	.	.	.	.	.	.	.	.	.	.	.	.	.	.	.	.
4763	17q11.2	17	29654736	29654736	C	T	C>T	NF1	exonic	nonsynonymous SNV	DDD4K.04043	DDD_2017	28135719	4293	0	exome	Developmental Delay (DD)	psychiatric disorder	validated	.	non-ssc	.	NF1:NM_000267:exon37:c.C5425T:p.R1809C,NF1:NM_001042492:exon38:c.C5488T:p.R1830C	.	.	.	.	.	.	.	.	.	.	.	.	.	.	.	.	.	.	.	rs797045139	COSM1382155;COSM39600	1(oesophagus);1(skin);1(central_nervous_system)	Pathogenic\x2cPathogenic\x2cPathogenic|Pathogenic	Neurofibromatosis\x2c_type_1\x2cNeurofibromatosis\x2c_type_1\x2cNeurofibromatosis\x2c_type_1|not_provided	RCV000190892.1\x2cRCV000190893.1\x2cRCV000190889.1|RCV000439869.1	MedGen:OMIM:Orphanet:SNOMED_CT\x2cMedGen:OMIM:Orphanet:SNOMED_CT\x2cMedGen:OMIM:Orphanet:SNOMED_CT|MedGen
7756	17q11.2	17	30687733	30687733	A	G	A>G	ZNF207	exonic	nonsynonymous SNV	DDD4K.02162	DDD_2017	28135719	4293	0	exome	Developmental Delay (DD)	psychiatric disorder	validated	.	non-ssc	.	ZNF207:NM_001032293:exon4:c.A424G:p.M142V,ZNF207:NM_001098507:exon4:c.A424G:p.M142V,ZNF207:NM_003457:exon4:c.A424G:p.M142V	0.0002	.	.	0.001	.	.	6.6e-05	0	0	0	0	0.0001	0	6.06e-05	0.0002	0.0002	0.0001	.	.	rs141404546	COSM165757	1(breast);2(urinary_tract)	.	.	.	.
79893	17q12	17	34942611	34942611	C	G	C>G	GGNBP2	exonic	nonsynonymous SNV	DDD4K.01688	DDD_2017	28135719	4293	0	exome	Developmental Delay (DD)	psychiatric disorder	validated	.	non-ssc	.	GGNBP2:NM_024835:exon12:c.C1624G:p.L542V	.	.	.	.	.	.	.	.	.	.	.	.	.	.	.	.	.	.	.	.	.	.	.	.	.	.
31	17q12	17	35583333	35583333	A	G	A>G	ACACA	exonic	nonsynonymous SNV	DDD4K.02067	DDD_2017	28135719	4293	0	exome	Developmental Delay (DD)	psychiatric disorder	validated	.	non-ssc	.	ACACA:NM_198837:exon24:c.T3002C:p.L1001P,ACACA:NM_198838:exon25:c.T2942C:p.L981P,ACACA:NM_198834:exon26:c.T3287C:p.L1096P,ACACA:NM_198836:exon26:c.T3176C:p.L1059P,ACACA:NM_198839:exon30:c.T3176C:p.L1059P	.	.	.	.	.	.	.	.	.	.	.	.	.	.	.	.	.	.	.	.	.	.	.	.	.	.
7703	17q12	17	36895854	36895854	G	A	G>A	PCGF2	exonic	nonsynonymous SNV	DDD4K.03796	DDD_2017	28135719	4293	0	exome	Developmental Delay (DD)	psychiatric disorder	validated	.	non-ssc	.	PCGF2:NM_007144:exon4:c.C194T:p.P65L	.	.	.	.	.	.	.	.	.	.	.	.	.	.	.	.	.	.	.	.	.	.	.	.	.	.
7703	17q12	17	36895854	36895854	G	A	G>A	PCGF2	exonic	nonsynonymous SNV	DDD4K.00323	DDD_2017	28135719	4293	0	exome	Developmental Delay (DD)	psychiatric disorder	validated	.	non-ssc	.	PCGF2:NM_007144:exon4:c.C194T:p.P65L	.	.	.	.	.	.	.	.	.	.	.	.	.	.	.	.	.	.	.	.	.	.	.	.	.	.
5709	17q21.1	17	38142858	38142858	C	T	C>T	PSMD3	exonic	nonsynonymous SNV	DDD4K.00539	DDD_2017	28135719	4293	0	exome	Developmental Delay (DD)	psychiatric disorder	validated	.	non-ssc	.	PSMD3:NM_002809:exon3:c.C442T:p.R148C	.	.	.	.	.	.	.	.	.	.	.	.	.	.	.	.	.	.	.	.	.	.	.	.	.	.
3866	17q21.2	17	39672464	39672464	G	T	G>T	KRT15	exonic	nonsynonymous SNV	DDD4K.00321	DDD_2017	28135719	4293	0	exome	Developmental Delay (DD)	psychiatric disorder	validated	.	non-ssc	.	KRT15:NM_002275:exon4:c.C792A:p.D264E	.	.	.	.	.	.	.	.	.	.	.	.	.	.	.	.	.	.	.	.	.	.	.	.	.	.
535	17q21.2	17	40665967	40665967	G	A	G>A	ATP6V0A1	exonic	nonsynonymous SNV	DDD4K.02211	DDD_2017	28135719	4293	0	exome	Developmental Delay (DD)	psychiatric disorder	validated	.	non-ssc	.	ATP6V0A1:NM_001130020:exon19:c.G2222A:p.R741Q,ATP6V0A1:NM_005177:exon19:c.G2201A:p.R734Q,ATP6V0A1:NM_001130021:exon20:c.G2219A:p.R740Q	.	.	.	.	.	.	.	.	.	.	.	.	.	.	.	.	.	.	.	.	.	.	.	.	.	.
535	17q21.2	17	40665967	40665967	G	A	G>A	ATP6V0A1	exonic	nonsynonymous SNV	DDD4K.01306	DDD_2017	28135719	4293	0	exome	Developmental Delay (DD)	psychiatric disorder	validated	.	non-ssc	.	ATP6V0A1:NM_001130020:exon19:c.G2222A:p.R741Q,ATP6V0A1:NM_005177:exon19:c.G2201A:p.R734Q,ATP6V0A1:NM_001130021:exon20:c.G2219A:p.R740Q	.	.	.	.	.	.	.	.	.	.	.	.	.	.	.	.	.	.	.	.	.	.	.	.	.	.
314	17q21.31	17	40998157	40998157	A	C	A>C	AOC2	exonic	nonsynonymous SNV	DDD4K.00550	DDD_2017	28135719	4293	0	exome	Developmental Delay (DD)	psychiatric disorder	validated	.	non-ssc	.	AOC2:NM_001158:exon1:c.A1514C:p.N505T,AOC2:NM_009590:exon1:c.A1514C:p.N505T	.	.	.	.	.	.	.	.	.	.	.	.	.	.	.	.	.	.	.	.	.	.	.	.	.	.
51747	17q21.33	17	48828114	48828114	G	A	G>A	LUC7L3	exonic	nonsynonymous SNV	DDD4K.00475	DDD_2017	28135719	4293	0	exome	Developmental Delay (DD)	psychiatric disorder	validated	.	non-ssc	.	LUC7L3:NM_001330330:exon11:c.G1286A:p.R429H	.	.	.	.	.	.	.	.	.	.	.	.	.	.	.	.	.	.	.	.	.	.	.	.	.	.
8288	17q22	17	56272523	56272523	C	T	C>T	EPX	exonic	nonsynonymous SNV	DDD4K.00867	DDD_2017	28135719	4293	0	exome	Developmental Delay (DD)	psychiatric disorder	validated	.	non-ssc	.	EPX:NM_000502:exon6:c.C793T:p.P265S	.	.	.	.	.	.	.	.	.	.	.	.	.	.	.	.	.	.	.	.	COSM5936297	1(skin)	.	.	.	.
9110	17q22	17	56572867	56572867	C	T	C>T	MTMR4	exonic	nonsynonymous SNV	DDD4K.03000	DDD_2017	28135719	4293	0	exome	Developmental Delay (DD)	psychiatric disorder	validated	.	non-ssc	.	MTMR4:NM_004687:exon16:c.G2636A:p.R879H	.	.	.	.	.	.	2.48e-05	0	0.0003	0	0	0	0	0	.	.	.	.	.	rs369882489	.	.	.	.	.	.
284083	17q22	17	56620652	56620652	T	C	T>C	C17orf47	exonic	nonsynonymous SNV	DDD4K.03203	DDD_2017	28135719	4293	0	exome	Developmental Delay (DD)	psychiatric disorder	validated	.	non-ssc	.	C17orf47:NM_001038704:exon1:c.A896G:p.Y299C	.	.	.	.	.	.	.	.	.	.	.	.	.	.	.	.	.	.	.	.	.	.	.	.	.	.
79665	17q23.1	17	57647918	57647918	G	A	G>A	DHX40	exonic	nonsynonymous SNV	DDD4K.02393	DDD_2017	28135719	4293	0	exome	Developmental Delay (DD)	psychiatric disorder	validated	.	non-ssc	.	DHX40:NM_024612:exon3:c.G320A:p.R107Q	.	.	.	.	.	.	.	.	.	.	.	.	.	.	.	.	.	.	.	.	.	.	.	.	.	.
1213	17q23.1	17	57754422	57754422	C	T	C>T	CLTC	exonic	nonsynonymous SNV	DDD4K.00876	DDD_2017	28135719	4293	0	exome	Developmental Delay (DD)	psychiatric disorder	validated	.	non-ssc	.	CLTC:NM_001288653:exon17:c.C2681T:p.P894L,CLTC:NM_004859:exon17:c.C2669T:p.P890L	.	.	.	.	.	.	.	.	.	.	.	.	.	.	.	.	.	.	.	.	COSM4929473	1(liver)	.	.	.	.
1213	17q23.1	17	57759080	57759080	T	C	T>C	CLTC	exonic	nonsynonymous SNV	DDD4K.01851	DDD_2017	28135719	4293	0	exome	Developmental Delay (DD)	psychiatric disorder	validated	.	non-ssc	.	CLTC:NM_001288653:exon21:c.T3334C:p.W1112R,CLTC:NM_004859:exon21:c.T3322C:p.W1108R	.	.	.	.	.	.	.	.	.	.	.	.	.	.	.	.	.	.	.	.	.	.	.	.	.	.
9969	17q23.2	17	60028299	60028299	G	T	G>T	MED13	exonic	nonsynonymous SNV	DDD4K.00502	DDD_2017	28135719	4293	0	exome	Developmental Delay (DD)	psychiatric disorder	validated	.	non-ssc	.	MED13:NM_005121:exon28:c.C6178A:p.Q2060K	.	.	.	.	.	.	.	.	.	.	.	.	.	.	.	.	.	.	.	.	.	.	.	.	.	.
11011	17q23.2	17	60642420	60642420	G	A	G>A	TLK2	exonic	nonsynonymous SNV	DDD4K.02204	DDD_2017	28135719	4293	0	exome	Developmental Delay (DD)	psychiatric disorder	validated	.	non-ssc	.	TLK2:NM_001284363:exon9:c.G794A:p.G265D,TLK2:NM_001284333:exon11:c.G890A:p.G297D,TLK2:NM_001330418:exon11:c.G443A:p.G148D,TLK2:NM_006852:exon11:c.G890A:p.G297D	.	.	.	.	.	.	.	.	.	.	.	.	.	.	.	.	.	.	.	.	.	.	.	.	.	.
11011	17q23.2	17	60663539	60663539	A	G	A>G	TLK2	exonic	nonsynonymous SNV	DDD4K.03140	DDD_2017	28135719	4293	0	exome	Developmental Delay (DD)	psychiatric disorder	validated	.	non-ssc	.	TLK2:NM_001284363:exon14:c.A1316G:p.H439R,TLK2:NM_001330418:exon16:c.A965G:p.H322R,TLK2:NM_006852:exon16:c.A1412G:p.H471R,TLK2:NM_001284333:exon17:c.A1478G:p.H493R	.	.	.	.	.	.	.	.	.	.	.	.	.	.	.	.	.	.	.	.	.	.	.	.	.	.
11011	17q23.2	17	60673972	60673972	A	G	A>G	TLK2	exonic	nonsynonymous SNV	DDD4K.00664	DDD_2017	28135719	4293	0	exome	Developmental Delay (DD)	psychiatric disorder	validated	.	non-ssc	.	TLK2:NM_001284363:exon15:c.A1391G:p.H464R,TLK2:NM_001330418:exon17:c.A1040G:p.H347R,TLK2:NM_006852:exon17:c.A1487G:p.H496R,TLK2:NM_001284333:exon18:c.A1553G:p.H518R	.	.	.	.	.	.	.	.	.	.	.	.	.	.	.	.	.	.	.	.	.	.	.	.	.	.
11011	17q23.2	17	60679501	60679501	G	A	G>A	TLK2	exonic	nonsynonymous SNV	DDD4K.00477	DDD_2017	28135719	4293	0	exome	Developmental Delay (DD)	psychiatric disorder	validated	.	non-ssc	.	TLK2:NM_001284363:exon17:c.G1723A:p.D575N,TLK2:NM_001330418:exon19:c.G1372A:p.D458N,TLK2:NM_006852:exon19:c.G1819A:p.D607N,TLK2:NM_001284333:exon20:c.G1885A:p.D629N	.	.	.	.	.	.	.	.	.	.	.	.	.	.	.	.	.	.	.	.	.	.	.	.	.	.
10238	17q23.3	17	61660984	61660984	G	A	G>A	DCAF7	exonic	nonsynonymous SNV	DDD4K.00187	DDD_2017	28135719	4293	0	exome	Developmental Delay (DD)	psychiatric disorder	validated	.	non-ssc	.	DCAF7:NM_005828:exon6:c.G649A:p.E217K	.	.	.	.	.	.	.	.	.	.	.	.	.	.	.	.	.	.	.	.	COSM192953	2(stomach)	.	.	.	.
90799	17q23.3	17	62530734	62530734	G	A	G>A	CEP95	exonic	nonsynonymous SNV	DDD4K.00498	DDD_2017	28135719	4293	0	exome	Developmental Delay (DD)	psychiatric disorder	validated	.	non-ssc	.	CEP95:NM_001316990:exon16:c.G1457A:p.R486K,CEP95:NM_138363:exon17:c.G1949A:p.R650K	.	.	.	.	.	.	.	.	.	.	.	.	.	.	.	.	.	.	.	.	.	.	.	.	.	.
5578	17q24.2	17	64731701	64731701	C	A	C>A	PRKCA	exonic	nonsynonymous SNV	DDD4K.03071	DDD_2017	28135719	4293	0	exome	Developmental Delay (DD)	psychiatric disorder	validated	.	non-ssc	.	PRKCA:NM_002737:exon10:c.C1151A:p.T384N	.	.	.	.	.	.	.	.	.	.	.	.	.	.	.	.	.	.	.	.	.	.	.	.	.	.
5578	17q24.2	17	64738805	64738805	T	C	T>C	PRKCA	exonic	nonsynonymous SNV	DDD4K.00170	DDD_2017	28135719	4293	0	exome	Developmental Delay (DD)	psychiatric disorder	validated	.	non-ssc	.	PRKCA:NM_002737:exon13:c.T1451C:p.M484T	.	.	.	.	.	.	.	.	.	.	.	.	.	.	.	.	.	.	.	.	.	.	.	.	.	.
54549	17q25.1	17	71346840	71346840	C	T	C>T	SDK2	exonic	nonsynonymous SNV	DDD4K.03419	DDD_2017	28135719	4293	0	exome	Developmental Delay (DD)	psychiatric disorder	validated	.	non-ssc	.	SDK2:NM_001144952:exon42:c.G5848A:p.V1950M	.	.	.	.	.	.	.	.	.	.	.	.	.	.	.	.	.	.	.	.	.	.	.	.	.	.
64446	17q25.1	17	72305444	72305444	G	A	G>A	DNAI2	exonic	nonsynonymous SNV	DDD4K.04049	DDD_2017	28135719	4293	0	exome	Developmental Delay (DD)	psychiatric disorder	validated	.	non-ssc	.	DNAI2:NM_001172810:exon10:c.G1264A:p.V422I,DNAI2:NM_023036:exon10:c.G1264A:p.V422I	0.0002	.	.	0.001	.	.	8.27e-05	0	0	0	0.0008	3.01e-05	0.0022	6.09e-05	.	.	.	.	.	rs201801542	COSM984000	1(endometrium)	.	.	.	.
146722	17q25.1	17	72691938	72691938	T	C	T>C	CD300LF	exonic	nonsynonymous SNV	DDD4K.03957	DDD_2017	28135719	4293	0	exome	Developmental Delay (DD)	psychiatric disorder	validated	.	non-ssc	.	CD300LF:NM_001289087:exon5:c.A620G:p.N207S,CD300LF:NM_001289082:exon6:c.A539G:p.N180S,CD300LF:NM_001289084:exon6:c.A688G:p.T230A,CD300LF:NM_001289086:exon6:c.A674G:p.N225S,CD300LF:NM_139018:exon6:c.A643G:p.T215A,CD300LF:NM_001289083:exon7:c.A689G:p.N230S,CD300LF:NM_001289085:exon7:c.A652G:p.T218A	.	.	.	.	.	.	8.27e-06	0	0	0	0	1.5e-05	0	0	.	.	.	.	.	rs748585405	.	.	.	.	.	.
57513	17q25.1	17	73502763	73502763	C	A	C>A	CASKIN2	exonic	nonsynonymous SNV	DDD4K.00021	DDD_2017	28135719	4293	0	exome	Developmental Delay (DD)	psychiatric disorder	validated	.	non-ssc	.	CASKIN2:NM_001142643:exon6:c.G272T:p.C91F,CASKIN2:NM_020753:exon7:c.G518T:p.C173F	.	.	.	.	.	.	.	.	.	.	.	.	.	.	.	.	.	.	.	.	.	.	.	.	.	.
23265	17q25.1	17	74084968	74084968	T	G	T>G	EXOC7	exonic	nonsynonymous SNV	DDD4K.00320	DDD_2017	28135719	4293	0	exome	Developmental Delay (DD)	psychiatric disorder	validated	.	non-ssc	.	EXOC7:NM_001282313:exon8:c.A961C:p.I321L,EXOC7:NM_015219:exon8:c.A991C:p.I331L,EXOC7:NM_001013839:exon9:c.A1084C:p.I362L,EXOC7:NM_001145298:exon9:c.A1060C:p.I354L,EXOC7:NM_001145297:exon10:c.A1237C:p.I413L,EXOC7:NM_001145299:exon10:c.A1153C:p.I385L	.	.	.	.	.	.	.	.	.	.	.	.	.	.	.	.	.	.	.	.	.	.	.	.	.	.
55036	17q25.3	17	78011932	78011932	G	A	G>A	CCDC40	exonic	nonsynonymous SNV	DDD4K.03674	DDD_2017	28135719	4293	0	exome	Developmental Delay (DD)	psychiatric disorder	validated	.	non-ssc	.	CCDC40:NM_001243342:exon2:c.G40A:p.E14K,CCDC40:NM_001330508:exon2:c.G40A:p.E14K,CCDC40:NM_017950:exon2:c.G40A:p.E14K	.	.	.	.	.	.	.	.	.	.	.	.	.	.	.	.	.	.	.	.	.	.	.	.	.	.
55036	17q25.3	17	78032373	78032373	G	A	G>A	CCDC40	exonic	nonsynonymous SNV	DDD4K.02039	DDD_2017	28135719	4293	0	exome	Developmental Delay (DD)	psychiatric disorder	validated	.	non-ssc	.	CCDC40:NM_001243342:exon8:c.G1240A:p.D414N,CCDC40:NM_001330508:exon8:c.G1240A:p.D414N,CCDC40:NM_017950:exon8:c.G1240A:p.D414N	.	.	.	.	.	.	0.0002	0	0	0	0	0	0.0011	0.0013	.	.	.	.	.	rs755164687	COSM3523261;COSM3523262;COSM3523263	1(skin)	.	.	.	.
79092	17q25.3	17	78172347	78172347	C	T	C>T	CARD14	exonic	nonsynonymous SNV	DDD4K.02379	DDD_2017	28135719	4293	0	exome	Developmental Delay (DD)	psychiatric disorder	validated	.	non-ssc	.	CARD14:NM_052819:exon10:c.C1097T:p.A366V,CARD14:NM_001257970:exon13:c.C1808T:p.A603V,CARD14:NM_024110:exon13:c.C1808T:p.A603V	.	.	.	.	.	.	0.0002	0	8.69e-05	0.0001	0	1.53e-05	0	0.0009	.	.	.	.	.	rs776909422	COSM5741175;COSM5741176	1(small_intestine)	.	.	.	.
57521	17q25.3	17	78854284	78854284	A	G	A>G	RPTOR	exonic	nonsynonymous SNV	DDD4K.02630	DDD_2017	28135719	4293	0	exome	Developmental Delay (DD)	psychiatric disorder	validated	.	non-ssc	.	RPTOR:NM_020761:exon14:c.A1579G:p.M527V	.	.	.	.	.	.	.	.	.	.	.	.	.	.	.	.	.	.	.	.	.	.	.	.	.	.
5986	17q25.3	17	80007662	80007662	A	G	A>G	RFNG	exonic	nonsynonymous SNV	DDD4K.02474	DDD_2017	28135719	4293	0	exome	Developmental Delay (DD)	psychiatric disorder	validated	.	non-ssc	.	RFNG:NM_002917:exon6:c.T719C:p.V240A	.	.	.	.	.	.	.	.	.	.	.	.	.	.	.	.	.	.	.	.	.	.	.	.	.	.
9229	18p11.31	18	3814203	3814203	C	T	C>T	DLGAP1	exonic	nonsynonymous SNV	DDD4K.02084	DDD_2017	28135719	4293	0	exome	Developmental Delay (DD)	psychiatric disorder	validated	.	non-ssc	.	DLGAP1:NM_001003809:exon2:c.G122A:p.R41Q,DLGAP1:NM_001242762:exon2:c.G164A:p.R55Q,DLGAP1:NM_001242763:exon2:c.G164A:p.R55Q,DLGAP1:NM_001242764:exon2:c.G146A:p.R49Q,DLGAP1:NM_001242765:exon2:c.G122A:p.R41Q,DLGAP1:NM_001242766:exon2:c.G122A:p.R41Q,DLGAP1:NM_001308390:exon2:c.G146A:p.R49Q,DLGAP1:NM_001242761:exon5:c.G1028A:p.R343Q,DLGAP1:NM_004746:exon5:c.G1028A:p.R343Q	.	.	.	.	.	.	8.24e-06	0	0	0	0	1.5e-05	0	0	.	.	.	.	.	rs766781410	.	.	.	.	.	.
11031	18p11.22	18	9859285	9859285	A	G	A>G	RAB31	exonic	nonsynonymous SNV	DDD4K.03852	DDD_2017	28135719	4293	0	exome	Developmental Delay (DD)	psychiatric disorder	validated	.	non-ssc	.	RAB31:NM_006868:exon7:c.A551G:p.E184G	.	.	.	.	.	.	1.66e-05	0	0	0	0	3.01e-05	0	0	0.0002	.	0.0002	.	.	rs371127102	.	.	.	.	.	.
55125	18p11.21	18	13071096	13071096	G	A	G>A	CEP192	exonic	nonsynonymous SNV	DDD4K.00277	DDD_2017	28135719	4293	0	exome	Developmental Delay (DD)	psychiatric disorder	validated	.	non-ssc	.	CEP192:NM_032142:exon28:c.G5233A:p.E1745K	.	.	.	.	.	.	.	.	.	.	.	.	.	.	.	.	.	.	.	.	COSM3821192;COSM3821191	1(breast)	.	.	.	.
59340	18q11.2	18	22057290	22057290	G	A	G>A	HRH4	exonic	nonsynonymous SNV	DDD4K.02051	DDD_2017	28135719	4293	0	exome	Developmental Delay (DD)	psychiatric disorder	validated	.	non-ssc	.	HRH4:NM_001143828:exon2:c.G673A:p.A225T,HRH4:NM_021624:exon3:c.G937A:p.A313T	.	.	.	.	.	.	.	.	.	.	.	.	.	.	.	.	.	.	.	.	.	.	.	.	.	.
26040	18q12.3	18	42531866	42531866	C	G	C>G	SETBP1	exonic	nonsynonymous SNV	DDD4K.03771	DDD_2017	28135719	4293	0	exome	Developmental Delay (DD)	psychiatric disorder	validated	.	non-ssc	.	SETBP1:NM_015559:exon4:c.C2561G:p.S854C	.	.	.	.	.	.	.	.	.	.	.	.	.	.	.	.	.	.	.	.	.	.	.	.	.	.
4089	18q21.2	18	48604676	48604676	A	G	A>G	SMAD4	exonic	nonsynonymous SNV	DDD4K.00700	DDD_2017	28135719	4293	0	exome	Developmental Delay (DD)	psychiatric disorder	validated	.	non-ssc	.	SMAD4:NM_005359:exon12:c.A1498G:p.I500V	.	.	.	.	.	.	.	.	.	.	.	.	.	.	.	.	.	.	.	rs281875322	.	.	Pathogenic|Pathogenic	Myhre_syndrome|not_provided	RCV000023061.5|RCV000059733.3	MedGen:OMIM:Orphanet|MedGen
89777	18q21.33	18	61225703	61225703	A	C	A>C	SERPINB12	exonic	nonsynonymous SNV	DDD4K.01525	DDD_2017	28135719	4293	0	exome	Developmental Delay (DD)	psychiatric disorder	validated	.	non-ssc	.	SERPINB12:NM_001307928:exon2:c.A287C:p.E96A	.	.	.	.	.	.	.	.	.	.	.	.	.	.	.	.	.	.	.	rs771795747	.	.	.	.	.	.
25914	18q22.2	18	67698129	67698129	T	G	T>G	RTTN	exonic	nonsynonymous SNV	DDD4K.00371	DDD_2017	28135719	4293	0	exome	Developmental Delay (DD)	psychiatric disorder	validated	.	non-ssc	.	RTTN:NM_001318520:exon40:c.A2894C:p.Q965P,RTTN:NM_173630:exon41:c.A5630C:p.Q1877P	.	.	.	.	.	.	.	.	.	.	.	.	.	.	.	.	.	.	.	.	.	.	.	.	.	.
201456	18q22.3	18	71797790	71797790	C	A	C>A	FBXO15	exonic	nonsynonymous SNV	DDD4K.03677	DDD_2017	28135719	4293	0	exome	Developmental Delay (DD)	psychiatric disorder	validated	.	non-ssc	.	FBXO15:NM_001142958:exon4:c.G436T:p.V146F,FBXO15:NM_152676:exon4:c.G208T:p.V70F	.	.	.	.	.	.	.	.	.	.	.	.	.	.	.	.	.	.	.	.	.	.	.	.	.	.
1528	18q22.3	18	71958987	71958987	C	T	C>T	CYB5A	exonic	nonsynonymous SNV	DDD4K.00253	DDD_2017	28135719	4293	0	exome	Developmental Delay (DD)	psychiatric disorder	validated	.	non-ssc	.	CYB5A:NM_001190807:exon1:c.G124A:p.E42K,CYB5A:NM_001914:exon1:c.G124A:p.E42K,CYB5A:NM_148923:exon1:c.G124A:p.E42K	.	.	.	.	.	.	.	.	.	.	.	.	.	.	.	.	.	.	.	.	.	.	.	.	.	.
644041	18q22.3	18	72021271	72021271	T	A	T>A	C18orf63	exonic	nonsynonymous SNV	DDD4K.01025	DDD_2017	28135719	4293	0	exome	Developmental Delay (DD)	psychiatric disorder	validated	.	non-ssc	.	C18orf63:NM_001174123:exon12:c.T1769A:p.L590Q	.	.	.	.	.	.	.	.	.	.	.	.	.	.	.	.	.	.	.	.	.	.	.	.	.	.
9658	18q23	18	74091434	74091434	G	A	G>A	ZNF516	exonic	nonsynonymous SNV	DDD4K.03119	DDD_2017	28135719	4293	0	exome	Developmental Delay (DD)	psychiatric disorder	validated	.	non-ssc	.	ZNF516:NM_014643:exon4:c.C2636T:p.A879V	.	.	.	.	.	.	0.0001	0	8.66e-05	0	0	0.0002	0	0	0.0002	0.0003	0.0001	.	.	rs201281243	.	.	.	.	.	.
1265	19p13.3	19	1036542	1036542	C	T	C>T	CNN2	exonic	nonsynonymous SNV	DDD4K.02464	DDD_2017	28135719	4293	0	exome	Developmental Delay (DD)	psychiatric disorder	validated	.	non-ssc	.	CNN2:NM_201277:exon5:c.C518T:p.T173M,CNN2:NM_001303499:exon6:c.C602T:p.T201M,CNN2:NM_001303501:exon6:c.C698T:p.T233M,CNN2:NM_004368:exon6:c.C635T:p.T212M	.	.	.	.	.	.	4.96e-05	0.0002	0	0	0	4.52e-05	0	6.06e-05	.	.	.	.	.	rs116408565	.	.	.	.	.	.
6929	19p13.3	19	1615422	1615422	C	T	C>T	TCF3	exonic	nonsynonymous SNV	DDD4K.00301	DDD_2017	28135719	4293	0	exome	Developmental Delay (DD)	psychiatric disorder	validated	.	non-ssc	.	TCF3:NM_003200:exon18:c.G1684A:p.V562I	.	.	.	.	.	.	.	.	.	.	.	.	.	.	.	.	.	.	.	.	.	.	.	.	.	.
8175	19p13.3	19	2243509	2243509	G	A	G>A	SF3A2	exonic	nonsynonymous SNV	DDD4K.00252	DDD_2017	28135719	4293	0	exome	Developmental Delay (DD)	psychiatric disorder	validated	.	non-ssc	.	SF3A2:NM_007165:exon2:c.G92A:p.R31Q	.	.	.	.	.	.	.	.	.	.	.	.	.	.	.	.	.	.	.	.	.	.	.	.	.	.
7089	19p13.3	19	3005436	3005436	T	A	T>A	TLE2	exonic	nonsynonymous SNV	DDD4K.01017	DDD_2017	28135719	4293	0	exome	Developmental Delay (DD)	psychiatric disorder	validated	.	non-ssc	.	TLE2:NM_001144762:exon15:c.A1529T:p.Q510L,TLE2:NM_001300846:exon17:c.A1898T:p.Q633L,TLE2:NM_003260:exon17:c.A1895T:p.Q632L,TLE2:NM_001144761:exon18:c.A1937T:p.Q646L	.	.	.	.	.	.	.	.	.	.	.	.	.	.	.	.	.	.	.	.	.	.	.	.	.	.
8698	19p13.3	19	3179247	3179247	G	A	G>A	S1PR4	exonic	nonsynonymous SNV	DDD4K.02208	DDD_2017	28135719	4293	0	exome	Developmental Delay (DD)	psychiatric disorder	validated	.	non-ssc	.	S1PR4:NM_003775:exon1:c.G457A:p.E153K	.	.	.	.	.	.	8.11e-05	0	0	0.0001	0	0.0001	0	0	0.0002	.	0.0004	.	.	rs142173388	.	.	.	.	.	.
10362	19p13.3	19	3576265	3576265	C	G	C>G	HMG20B	exonic	nonsynonymous SNV	DDD4K.00257	DDD_2017	28135719	4293	0	exome	Developmental Delay (DD)	psychiatric disorder	validated	.	non-ssc	.	HMG20B:NM_006339:exon6:c.C479G:p.S160W	.	.	.	.	.	.	4.15e-05	0	0	0.0001	0.0002	4.51e-05	0	0	.	.	.	.	.	rs772329634	.	.	.	.	.	.
27134	19p13.3	19	3730645	3730645	G	A	G>A	TJP3	exonic	nonsynonymous SNV	DDD4K.03618	DDD_2017	28135719	4293	0	exome	Developmental Delay (DD)	psychiatric disorder	validated	.	non-ssc	.	TJP3:NM_001267560:exon5:c.G554A:p.R185Q,TJP3:NM_001267561:exon5:c.G581A:p.R194Q	0.0002	.	0.0014	.	.	.	.	.	.	.	.	.	.	.	.	.	.	.	.	rs562880581	COSM5564812	1(prostate)	.	.	.	.
91039	19p13.3	19	4714194	4714194	C	A	C>A	DPP9	exonic	nonsynonymous SNV	DDD4K.03958	DDD_2017	28135719	4293	0	exome	Developmental Delay (DD)	psychiatric disorder	validated	.	non-ssc	.	DPP9:NM_139159:exon4:c.G212T:p.R71L	.	.	.	.	.	.	.	.	.	.	.	.	.	.	.	.	.	.	.	.	.	.	.	.	.	.
10382	19p13.3	19	6502220	6502220	G	A	G>A	TUBB4A	exonic	nonsynonymous SNV	DDD4K.00886	DDD_2017	28135719	4293	0	exome	Developmental Delay (DD)	psychiatric disorder	validated	.	non-ssc	.	TUBB4A:NM_006087:exon1:c.C4T:p.R2W,TUBB4A:NM_001289123:exon2:c.C157T:p.R53W,TUBB4A:NM_001289127:exon2:c.C139T:p.R47W,TUBB4A:NM_001289129:exon2:c.C4T:p.R2W	.	.	.	.	.	.	.	.	.	.	.	.	.	.	.	.	.	.	.	.	.	.	Pathogenic\x2cPathogenic|Pathogenic	Leukodystrophy\x2c_hypomyelinating\x2c_6\x2cAutosomal_dominant_torsion_dystonia_4|Leukodystrophy\x2c_hypomyelinating\x2c_6	RCV000258578.1\x2cRCV000043680.4|RCV000258667.1	MedGen:OMIM:Orphanet\x2cMedGen:OMIM:Orphanet|MedGen:OMIM:Orphanet
56927	19p13.3	19	6732378	6732378	G	C	G>C	GPR108	exonic	nonsynonymous SNV	DDD4K.01484	DDD_2017	28135719	4293	0	exome	Developmental Delay (DD)	psychiatric disorder	validated	.	non-ssc	.	GPR108:NM_001080452:exon12:c.C1021G:p.L341V	.	.	.	.	.	.	.	.	.	.	.	.	.	.	.	.	.	.	.	.	.	.	.	.	.	.
9322	19p13.3	19	6751251	6751251	T	C	T>C	TRIP10	exonic	nonsynonymous SNV	DDD4K.01233	DDD_2017	28135719	4293	0	exome	Developmental Delay (DD)	psychiatric disorder	validated	.	non-ssc	.	TRIP10:NM_001288963:exon14:c.T1696C:p.C566R	.	.	.	.	.	.	.	.	.	.	.	.	.	.	.	.	.	.	.	.	.	.	.	.	.	.
57662	19p13.2	19	7681414	7681414	C	T	C>T	CAMSAP3	exonic	nonsynonymous SNV	DDD4K.01688	DDD_2017	28135719	4293	0	exome	Developmental Delay (DD)	psychiatric disorder	validated	.	non-ssc	.	CAMSAP3:NM_020902:exon14:c.C3118T:p.R1040W,CAMSAP3:NM_001080429:exon16:c.C3199T:p.R1067W	.	.	.	.	.	.	8.3e-06	0	0	0.0001	0	0	0	0	.	.	.	.	.	rs765277377	.	.	.	.	.	.
94025	19p13.2	19	8993520	8993520	C	T	C>T	MUC16	exonic	nonsynonymous SNV	DDD4K.03179	DDD_2017	28135719	4293	0	exome	Developmental Delay (DD)	psychiatric disorder	validated	.	non-ssc	.	MUC16:NM_024690:exon66:c.G41569A:p.G13857R	0.0004	0.0008	0.0014	.	.	.	0.0001	0.0001	8.66e-05	0	0	0.0002	0	7.14e-05	.	.	.	.	.	rs541972386	.	.	.	.	.	.
94025	19p13.2	19	9084610	9084610	C	T	C>T	MUC16	exonic	nonsynonymous SNV	DDD4K.03492	DDD_2017	28135719	4293	0	exome	Developmental Delay (DD)	psychiatric disorder	validated	.	non-ssc	.	MUC16:NM_024690:exon1:c.G7205A:p.S2402N	.	.	.	.	.	.	8.29e-06	0	0	0	0	1.5e-05	0	0	.	.	.	.	.	rs748552289	.	.	.	.	.	.
94025	19p13.2	19	9088543	9088543	G	A	G>A	MUC16	exonic	nonsynonymous SNV	DDD4K.03597	DDD_2017	28135719	4293	0	exome	Developmental Delay (DD)	psychiatric disorder	validated	.	non-ssc	.	MUC16:NM_024690:exon1:c.C3272T:p.A1091V	.	.	.	.	.	.	.	.	.	.	.	.	.	.	.	.	.	.	.	.	.	.	.	.	.	.
50509	19p13.2	19	10084888	10084888	G	A	G>A	COL5A3	exonic	nonsynonymous SNV	DDD4K.03312	DDD_2017	28135719	4293	0	exome	Developmental Delay (DD)	psychiatric disorder	validated	.	non-ssc	.	COL5A3:NM_015719:exon47:c.C3463T:p.P1155S	.	.	.	.	.	.	.	.	.	.	.	.	.	.	.	.	.	.	.	.	.	.	.	.	.	.
6597	19p13.2	19	11132405	11132405	G	A	G>A	SMARCA4	exonic	nonsynonymous SNV	DDD4K.01621	DDD_2017	28135719	4293	0	exome	Developmental Delay (DD)	psychiatric disorder	validated	.	non-ssc	.	SMARCA4:NM_001128845:exon18:c.G2621A:p.R874H,SMARCA4:NM_001128846:exon18:c.G2621A:p.R874H,SMARCA4:NM_001128847:exon18:c.G2621A:p.R874H,SMARCA4:NM_001128848:exon18:c.G2621A:p.R874H,SMARCA4:NM_001128849:exon19:c.G2621A:p.R874H,SMARCA4:NM_003072:exon19:c.G2621A:p.R874H,SMARCA4:NM_001128844:exon20:c.G2621A:p.R874H	.	.	.	.	.	.	.	.	.	.	.	.	.	.	.	.	.	.	.	.	COSM6003499;COSM6003498	1(prostate)	.	.	.	.
6597	19p13.2	19	11134267	11134267	G	A	G>A	SMARCA4	exonic	nonsynonymous SNV	DDD4K.03863	DDD_2017	28135719	4293	0	exome	Developmental Delay (DD)	psychiatric disorder	validated	.	non-ssc	.	SMARCA4:NM_001128845:exon19:c.G2933A:p.R978Q,SMARCA4:NM_001128846:exon19:c.G2933A:p.R978Q,SMARCA4:NM_001128847:exon19:c.G2933A:p.R978Q,SMARCA4:NM_001128848:exon19:c.G2933A:p.R978Q,SMARCA4:NM_001128849:exon20:c.G2933A:p.R978Q,SMARCA4:NM_003072:exon20:c.G2933A:p.R978Q,SMARCA4:NM_001128844:exon21:c.G2933A:p.R978Q	.	.	.	.	.	.	.	.	.	.	.	.	.	.	.	.	.	.	.	.	COSM1172566;COSM1172567	1(oesophagus);1(skin)	.	.	.	.
57572	19p13.2	19	11327971	11327971	A	G	A>G	DOCK6	exonic	nonsynonymous SNV	DDD4K.02564	DDD_2017	28135719	4293	0	exome	Developmental Delay (DD)	psychiatric disorder	validated	.	non-ssc	.	DOCK6:NM_020812:exon29:c.T3647C:p.M1216T	.	.	.	.	.	.	.	.	.	.	.	.	.	.	.	.	.	.	.	.	.	.	.	.	.	.
374882	19p13.2	19	11456031	11456031	A	T	A>T	TMEM205	exonic	nonsynonymous SNV	DDD4K.03530	DDD_2017	28135719	4293	0	exome	Developmental Delay (DD)	psychiatric disorder	validated	.	non-ssc	.	TMEM205:NM_198536:exon2:c.T161A:p.F54Y,TMEM205:NM_001145416:exon3:c.T161A:p.F54Y,TMEM205:NM_001321112:exon3:c.T161A:p.F54Y,TMEM205:NM_001321113:exon3:c.T161A:p.F54Y,TMEM205:NM_001321114:exon3:c.T161A:p.F54Y,TMEM205:NM_033408:exon3:c.T161A:p.F54Y	.	.	.	.	.	.	.	.	.	.	.	.	.	.	.	.	.	.	.	.	.	.	.	.	.	.
4125	19p13.2	19	12759988	12759988	C	T	C>T	MAN2B1	exonic	nonsynonymous SNV	DDD4K.03485	DDD_2017	28135719	4293	0	exome	Developmental Delay (DD)	psychiatric disorder	validated	.	non-ssc	.	MAN2B1:NM_000528:exon20:c.G2398A:p.G800R,MAN2B1:NM_001173498:exon20:c.G2395A:p.G799R	.	.	.	.	.	.	8.28e-06	0	0	0	0	1.5e-05	0	0	.	.	.	.	.	rs398123456	.	.	Uncertain significance\x2cUncertain significance\x2cPathogenic	Deficiency_of_alpha-mannosidase\x2cDeficiency_of_alpha-mannosidase\x2cnot_provided	RCV000207017.1\x2cRCV000206964.1\x2cRCV000079076.4	MedGen:OMIM:Orphanet:SNOMED_CT\x2cMedGen:OMIM:Orphanet:SNOMED_CT\x2cMedGen
773	19p13.2	19	13428043	13428043	G	A	G>A	CACNA1A	exonic	nonsynonymous SNV	DDD4K.03242	DDD_2017	28135719	4293	0	exome	Developmental Delay (DD)	psychiatric disorder	validated	.	non-ssc	.	CACNA1A:NM_001127221:exon11:c.C1441T:p.R481C,CACNA1A:NM_001127222:exon11:c.C1438T:p.R480C	.	.	.	.	.	.	.	.	.	.	.	.	.	.	.	.	.	.	.	.	.	.	.	.	.	.
79173	19p13.12	19	14000692	14000692	T	C	T>C	C19orf57	exonic	nonsynonymous SNV	DDD4K.01756	DDD_2017	28135719	4293	0	exome	Developmental Delay (DD)	psychiatric disorder	validated	.	non-ssc	.	C19orf57:NM_001345846:exon5:c.A623G:p.H208R,C19orf57:NM_001345847:exon5:c.A623G:p.H208R,C19orf57:NM_001345843:exon6:c.A1394G:p.H465R,C19orf57:NM_001345844:exon6:c.A1394G:p.H465R,C19orf57:NM_024323:exon6:c.A977G:p.H326R	.	.	.	.	.	.	.	.	.	.	.	.	.	.	.	.	.	.	.	.	.	.	.	.	.	.
9466	19p13.12	19	14162998	14162998	G	A	G>A	IL27RA	exonic	nonsynonymous SNV	DDD4K.00802	DDD_2017	28135719	4293	0	exome	Developmental Delay (DD)	psychiatric disorder	validated	.	non-ssc	.	IL27RA:NM_004843:exon14:c.G1807A:p.A603T	0.0002	.	.	.	0.001	.	0.0002	0	0.0004	0.0001	0	0.0002	0	0.0002	0.0001	.	0.0001	.	.	rs371858042	.	.	.	.	.	.
4854	19p13.12	19	15299920	15299920	C	T	C>T	NOTCH3	exonic	nonsynonymous SNV	DDD4K.03951	DDD_2017	28135719	4293	0	exome	Developmental Delay (DD)	psychiatric disorder	validated	.	non-ssc	.	NOTCH3:NM_000435:exon8:c.G1258A:p.G420S	.	.	.	.	.	.	.	.	.	.	.	.	.	.	.	.	.	.	.	.	.	.	.	.	.	.
26539	19p13.12	19	15918640	15918640	C	T	C>T	OR10H1	exonic	nonsynonymous SNV	DDD4K.02102	DDD_2017	28135719	4293	0	exome	Developmental Delay (DD)	psychiatric disorder	validated	.	non-ssc	.	OR10H1:NM_013940:exon1:c.G208A:p.E70K	.	.	.	.	.	.	.	.	.	.	.	.	.	.	.	.	.	.	.	.	COSM4382372	1(large_intestine)	.	.	.	.
23309	19p13.11	19	16980295	16980295	C	T	C>T	SIN3B	exonic	nonsynonymous SNV	DDD4K.00307	DDD_2017	28135719	4293	0	exome	Developmental Delay (DD)	psychiatric disorder	validated	.	non-ssc	.	SIN3B:NM_001297597:exon4:c.C601T:p.R201C,SIN3B:NM_001297595:exon13:c.C1831T:p.R611C,SIN3B:NM_015260:exon14:c.C1927T:p.R643C	.	.	.	.	.	.	0	0	0	0	0	0	0	0	.	.	.	.	.	rs774327119	COSM5644167	1(oesophagus)	.	.	.	.
404037	19p13.11	19	19371804	19371804	G	A	G>A	HAPLN4	exonic	nonsynonymous SNV	DDD4K.02895	DDD_2017	28135719	4293	0	exome	Developmental Delay (DD)	psychiatric disorder	validated	.	non-ssc	.	HAPLN4:NM_023002:exon3:c.C302T:p.A101V	.	.	.	.	.	.	.	.	.	.	.	.	.	.	.	.	.	.	.	.	.	.	.	.	.	.
57655	19q13.12	19	35500816	35500816	C	T	C>T	GRAMD1A	exonic	nonsynonymous SNV	DDD4K.01751	DDD_2017	28135719	4293	0	exome	Developmental Delay (DD)	psychiatric disorder	validated	.	non-ssc	.	GRAMD1A:NM_001136199:exon3:c.C244T:p.R82C,GRAMD1A:NM_001320034:exon4:c.C265T:p.R89C,GRAMD1A:NM_020895:exon4:c.C265T:p.R89C,GRAMD1A:NM_001320036:exon5:c.C526T:p.R176C	.	.	.	.	.	.	.	.	.	.	.	.	.	.	.	.	.	.	.	.	.	.	.	.	.	.
9757	19q13.12	19	36220069	36220069	C	T	C>T	KMT2B	exonic	nonsynonymous SNV	DDD4K.04265	DDD_2017	28135719	4293	0	exome	Developmental Delay (DD)	psychiatric disorder	validated	.	non-ssc	.	KMT2B:NM_014727:exon22:c.C4789T:p.R1597W	.	.	.	.	.	.	.	.	.	.	.	.	.	.	.	.	.	.	.	.	.	.	.	.	.	.
9757	19q13.12	19	36221673	36221673	T	C	T>C	KMT2B	exonic	nonsynonymous SNV	DDD4K.00729	DDD_2017	28135719	4293	0	exome	Developmental Delay (DD)	psychiatric disorder	validated	.	non-ssc	.	KMT2B:NM_014727:exon26:c.T5342C:p.L1781P	.	.	.	.	.	.	.	.	.	.	.	.	.	.	.	.	.	.	.	.	.	.	.	.	.	.
284403	19q13.12	19	36595712	36595712	C	T	C>T	WDR62	exonic	nonsynonymous SNV	DDD4K.01450	DDD_2017	28135719	4293	0	exome	Developmental Delay (DD)	psychiatric disorder	validated	.	non-ssc	.	WDR62:NM_001083961:exon32:c.C4354T:p.R1452W,WDR62:NM_173636:exon32:c.C4339T:p.R1447W	.	.	.	.	.	.	1.69e-05	9.96e-05	0	0.0001	0	0	0	0	0.0001	0.0002	.	.	.	rs372336874	.	.	.	.	.	.
7705	19q13.12	19	36727637	36727637	C	G	C>G	ZNF146	exonic	nonsynonymous SNV	DDD4K.04126	DDD_2017	28135719	4293	0	exome	Developmental Delay (DD)	psychiatric disorder	validated	.	non-ssc	.	ZNF146:NM_001099638:exon3:c.C295G:p.P99A,ZNF146:NM_001099639:exon3:c.C295G:p.P99A,ZNF146:NM_007145:exon4:c.C295G:p.P99A	.	.	.	.	.	.	.	.	.	.	.	.	.	.	.	.	.	.	.	.	.	.	.	.	.	.
1891	19q13.2	19	39306344	39306344	A	G	A>G	ECH1	exonic	nonsynonymous SNV	DDD4K.00486	DDD_2017	28135719	4293	0	exome	Developmental Delay (DD)	psychiatric disorder	validated	.	non-ssc	.	ECH1:NM_001398:exon10:c.T896C:p.M299T	.	.	.	.	.	.	.	.	.	.	.	.	.	.	.	.	.	.	.	.	.	.	.	.	.	.
92799	19q13.2	19	41086756	41086756	G	A	G>A	SHKBP1	exonic	nonsynonymous SNV	DDD4K.01035	DDD_2017	28135719	4293	0	exome	Developmental Delay (DD)	psychiatric disorder	validated	.	non-ssc	.	SHKBP1:NM_138392:exon9:c.G758A:p.G253D	.	.	.	.	.	.	8.3e-06	0	0	0	0	1.51e-05	0	0	.	.	.	.	.	rs762538613	.	.	.	.	.	.
90273	19q13.2	19	42082688	42082688	C	G	C>G	CEACAM21	exonic	nonsynonymous SNV	DDD4K.03380	DDD_2017	28135719	4293	0	exome	Developmental Delay (DD)	psychiatric disorder	validated	.	non-ssc	.	CEACAM21:NM_001098506:exon1:c.C62G:p.T21R,CEACAM21:NM_033543:exon1:c.C62G:p.T21R	.	.	.	.	.	.	.	.	.	.	.	.	.	.	.	.	.	.	.	.	.	.	.	.	.	.
4680	19q13.2	19	42265201	42265201	G	A	G>A	CEACAM6	exonic	nonsynonymous SNV	DDD4K.01140	DDD_2017	28135719	4293	0	exome	Developmental Delay (DD)	psychiatric disorder	validated	.	non-ssc	.	CEACAM6:NM_002483:exon3:c.G469A:p.V157M	0.0008	0.0023	0.0014	.	.	.	0.0004	0.0016	0.0006	0	0	0.0004	0.0022	0	0.0006	0.0016	0.0001	.	.	rs143159805	.	.	.	.	.	.
56269	19q13.31	19	44223312	44223312	G	A	G>A	IRGC	exonic	nonsynonymous SNV	DDD4K.02001	DDD_2017	28135719	4293	0	exome	Developmental Delay (DD)	psychiatric disorder	validated	.	non-ssc	.	IRGC:NM_019612:exon2:c.G602A:p.R201Q	.	.	.	.	.	.	8.91e-06	0	0	0	0	1.64e-05	0	0	.	.	.	.	.	rs759571667	.	.	.	.	.	.
7768	19q13.31	19	44635051	44635051	A	G	A>G	ZNF225	exonic	nonsynonymous SNV	DDD4K.00155	DDD_2017	28135719	4293	0	exome	Developmental Delay (DD)	psychiatric disorder	validated	.	non-ssc	.	ZNF225:NM_013362:exon5:c.A284G:p.H95R,ZNF225:NM_001321685:exon6:c.A284G:p.H95R	.	.	.	.	.	.	2.5e-05	0.0001	0	0	0.0002	1.51e-05	0	0	.	.	.	.	.	rs769520723	.	.	.	.	.	.
4059	19q13.32	19	45322690	45322690	T	A	T>A	BCAM	exonic	nonsynonymous SNV	DDD4K.02878	DDD_2017	28135719	4293	0	exome	Developmental Delay (DD)	psychiatric disorder	validated	.	non-ssc	.	BCAM:NM_001013257:exon12:c.T1561A:p.S521T,BCAM:NM_005581:exon12:c.T1561A:p.S521T	.	.	.	.	.	.	.	.	.	.	.	.	.	.	.	.	.	.	.	.	.	.	.	.	.	.
81492	19q13.32	19	46307704	46307704	G	A	G>A	RSPH6A	exonic	nonsynonymous SNV	DDD4K.00067	DDD_2017	28135719	4293	0	exome	Developmental Delay (DD)	psychiatric disorder	validated	.	non-ssc	.	RSPH6A:NM_030785:exon3:c.C1459T:p.R487C	.	.	.	.	.	.	8.26e-06	0	0	0	0	1.5e-05	0	0	.	.	.	.	.	rs759326480	.	.	.	.	.	.
2909	19q13.32	19	47424630	47424630	T	G	T>G	ARHGAP35	exonic	nonsynonymous SNV	DDD4K.02391	DDD_2017	28135719	4293	0	exome	Developmental Delay (DD)	psychiatric disorder	validated	.	non-ssc	.	ARHGAP35:NM_004491:exon1:c.T2698G:p.L900V	.	.	.	.	.	.	.	.	.	.	.	.	.	.	.	.	.	.	.	.	.	.	.	.	.	.
4861	19q13.32	19	47542770	47542770	A	G	A>G	NPAS1	exonic	nonsynonymous SNV	DDD4K.00477	DDD_2017	28135719	4293	0	exome	Developmental Delay (DD)	psychiatric disorder	validated	.	non-ssc	.	NPAS1:NM_001321086:exon4:c.A382G:p.M128V,NPAS1:NM_002517:exon8:c.A910G:p.M304V	.	.	.	.	.	.	.	.	.	.	.	.	.	.	.	.	.	.	.	.	.	.	.	.	.	.
10945	19q13.33	19	48887562	48887562	C	T	C>T	KDELR1	exonic	nonsynonymous SNV	DDD4K.02502	DDD_2017	28135719	4293	0	exome	Developmental Delay (DD)	psychiatric disorder	validated	.	non-ssc	.	KDELR1:NM_006801:exon4:c.G529A:p.D177N	.	.	.	.	.	.	8.26e-06	0	0	0	0	1.5e-05	0	0	.	.	.	.	.	rs776961348	.	.	.	.	.	.
56848	19q13.33	19	49132252	49132252	G	A	G>A	SPHK2	exonic	nonsynonymous SNV	DDD4K.04207	DDD_2017	28135719	4293	0	exome	Developmental Delay (DD)	psychiatric disorder	validated	.	non-ssc	.	SPHK2:NM_001204160:exon6:c.G1079A:p.R360H,SPHK2:NM_001243876:exon6:c.G569A:p.R190H,SPHK2:NM_001204158:exon7:c.G1010A:p.R337H,SPHK2:NM_001204159:exon7:c.G1187A:p.R396H,SPHK2:NM_020126:exon7:c.G1187A:p.R396H	.	.	.	.	.	.	.	.	.	.	.	.	.	.	.	.	.	.	.	.	.	.	.	.	.	.
27294	19q13.33	19	49448180	49448180	A	G	A>G	DHDH	exonic	nonsynonymous SNV	DDD4K.04270	DDD_2017	28135719	4293	0	exome	Developmental Delay (DD)	psychiatric disorder	validated	.	non-ssc	.	DHDH:NM_014475:exon7:c.A995G:p.D332G	.	.	.	.	.	.	.	.	.	.	.	.	.	.	.	.	.	.	.	.	.	.	.	.	.	.
10856	19q13.33	19	49510292	49510292	G	A	G>A	RUVBL2	exonic	nonsynonymous SNV	DDD4K.03133	DDD_2017	28135719	4293	0	exome	Developmental Delay (DD)	psychiatric disorder	validated	.	non-ssc	.	RUVBL2:NM_001321190:exon5:c.G181A:p.G61S,RUVBL2:NM_001321191:exon5:c.G148A:p.G50S,RUVBL2:NM_006666:exon5:c.G283A:p.G95S	.	.	.	.	.	.	.	.	.	.	.	.	.	.	.	.	.	.	.	.	.	.	.	.	.	.
60385	19q13.33	19	50265271	50265271	G	A	G>A	TSKS	exonic	nonsynonymous SNV	DDD4K.03462	DDD_2017	28135719	4293	0	exome	Developmental Delay (DD)	psychiatric disorder	validated	.	non-ssc	.	TSKS:NM_021733:exon2:c.C389T:p.T130M	.	.	.	.	.	.	6.66e-05	0	0	0.0005	0	3.02e-05	0	0.0001	.	.	.	.	.	rs778576898	.	.	.	.	.	.
79735	19q13.33	19	50385631	50385631	G	A	G>A	TBC1D17	exonic	nonsynonymous SNV	DDD4K.02683	DDD_2017	28135719	4293	0	exome	Developmental Delay (DD)	psychiatric disorder	validated	.	non-ssc	.	TBC1D17:NM_001168222:exon6:c.G673A:p.E225K,TBC1D17:NM_024682:exon7:c.G772A:p.E258K	.	.	.	.	.	.	.	.	.	.	.	.	.	.	.	.	.	.	.	.	.	.	.	.	.	.
354	19q13.33	19	51363229	51363229	G	T	G>T	KLK3	exonic	nonsynonymous SNV	DDD4K.03852	DDD_2017	28135719	4293	0	exome	Developmental Delay (DD)	psychiatric disorder	validated	.	non-ssc	.	KLK3:NM_001030048:exon5:c.G503T:p.G168V,KLK3:NM_001648:exon5:c.G632T:p.G211V	.	.	.	.	.	.	.	.	.	.	.	.	.	.	.	.	.	.	.	.	.	.	.	.	.	.
7728	19q13.41	19	52091581	52091581	C	T	C>T	ZNF175	exonic	nonsynonymous SNV	DDD4K.02326	DDD_2017	28135719	4293	0	exome	Developmental Delay (DD)	psychiatric disorder	validated	.	non-ssc	.	ZNF175:NM_007147:exon5:c.C1997T:p.T666M	.	.	.	.	.	.	4.12e-05	9.63e-05	0	0.0005	0	0	0	0	0.0001	0.0002	.	.	.	rs372753113	COSM2926097	1(stomach)	.	.	.	.
5518	19q13.41	19	52715971	52715971	C	T	C>T	PPP2R1A	exonic	nonsynonymous SNV	DDD4K.00427	DDD_2017	28135719	4293	0	exome	Developmental Delay (DD)	psychiatric disorder	validated	.	non-ssc	.	PPP2R1A:NM_014225:exon5:c.C536T:p.P179L	.	.	.	.	.	.	.	.	.	.	.	.	.	.	.	.	.	.	.	rs786205228	COSM86038	7(endometrium)	Likely pathogenic|Likely pathogenic\x2cPathogenic|Pathogenic|Likely pathogenic|Likely pathogenic	Uterine_Carcinosarcoma|Malignant_neoplasm_of_body_of_uterus\x2cMental_retardation\x2c_autosomal_dominant_36|not_provided|Uterine_Carcinosarcoma|Malignant_neoplasm_of_body_of_uterus	RCV000433795.1|RCV000444299.1\x2cRCV000170501.3|RCV000391040.1|RCV000426451.1|RCV000433223.1	MedGen|MedGen\x2cMedGen:OMIM|MedGen|MedGen|MedGen
5518	19q13.41	19	52715979	52715979	C	T	C>T	PPP2R1A	exonic	nonsynonymous SNV	DDD4K.02231	DDD_2017	28135719	4293	0	exome	Developmental Delay (DD)	psychiatric disorder	validated	.	non-ssc	.	PPP2R1A:NM_014225:exon5:c.C544T:p.R182W	.	.	.	.	.	.	.	.	.	.	.	.	.	.	.	.	.	.	.	rs786205227	COSM51212	2(ovary);1(stomach);6(endometrium)	Pathogenic|Pathogenic	Mental_retardation\x2c_autosomal_dominant_36|not_provided	RCV000170500.4|RCV000412854.1	MedGen:OMIM|MedGen
5518	19q13.41	19	52715979	52715979	C	T	C>T	PPP2R1A	exonic	nonsynonymous SNV	DDD4K.02401	DDD_2017	28135719	4293	0	exome	Developmental Delay (DD)	psychiatric disorder	validated	.	non-ssc	.	PPP2R1A:NM_014225:exon5:c.C544T:p.R182W	.	.	.	.	.	.	.	.	.	.	.	.	.	.	.	.	.	.	.	rs786205227	COSM51212	2(ovary);1(stomach);6(endometrium)	Pathogenic|Pathogenic	Mental_retardation\x2c_autosomal_dominant_36|not_provided	RCV000170500.4|RCV000412854.1	MedGen:OMIM|MedGen
4849	19q13.42	19	54646887	54646887	G	C	G>C	CNOT3	exonic	nonsynonymous SNV	DDD4K.03571	DDD_2017	28135719	4293	0	exome	Developmental Delay (DD)	psychiatric disorder	validated	.	non-ssc	.	CNOT3:NM_014516:exon3:c.G58C:p.E20Q	.	.	.	.	.	.	.	.	.	.	.	.	.	.	.	.	.	.	.	.	.	.	.	.	.	.
4849	19q13.42	19	54647226	54647226	C	G	C>G	CNOT3	exonic	nonsynonymous SNV	DDD4K.01974	DDD_2017	28135719	4293	0	exome	Developmental Delay (DD)	psychiatric disorder	validated	.	non-ssc	.	CNOT3:NM_014516:exon4:c.C142G:p.L48V	.	.	.	.	.	.	.	.	.	.	.	.	.	.	.	.	.	.	.	.	.	.	.	.	.	.
4849	19q13.42	19	54649412	54649412	C	T	C>T	CNOT3	exonic	nonsynonymous SNV	DDD4K.03884	DDD_2017	28135719	4293	0	exome	Developmental Delay (DD)	psychiatric disorder	validated	.	non-ssc	.	CNOT3:NM_014516:exon8:c.C562T:p.R188C	.	.	.	.	.	.	.	.	.	.	.	.	.	.	.	.	.	.	.	.	.	.	.	.	.	.
4849	19q13.42	19	54649413	54649413	G	A	G>A	CNOT3	exonic	nonsynonymous SNV	DDD4K.00123	DDD_2017	28135719	4293	0	exome	Developmental Delay (DD)	psychiatric disorder	validated	.	non-ssc	.	CNOT3:NM_014516:exon8:c.G563A:p.R188H	.	.	.	.	.	.	.	.	.	.	.	.	.	.	.	.	.	.	.	.	COSM1000975;COSM1000974	1(endometrium)	.	.	.	.
4849	19q13.42	19	54649413	54649413	G	A	G>A	CNOT3	exonic	nonsynonymous SNV	DDD4K.01004	DDD_2017	28135719	4293	0	exome	Developmental Delay (DD)	psychiatric disorder	validated	.	non-ssc	.	CNOT3:NM_014516:exon8:c.G563A:p.R188H	.	.	.	.	.	.	.	.	.	.	.	.	.	.	.	.	.	.	.	.	COSM1000975;COSM1000974	1(endometrium)	.	.	.	.
11338	19q13.42	19	56172514	56172514	C	T	C>T	U2AF2	exonic	nonsynonymous SNV	DDD4K.00721	DDD_2017	28135719	4293	0	exome	Developmental Delay (DD)	psychiatric disorder	validated	.	non-ssc	.	U2AF2:NM_001012478:exon5:c.C445T:p.R149W,U2AF2:NM_007279:exon5:c.C445T:p.R149W	.	.	.	.	.	.	.	.	.	.	.	.	.	.	.	.	.	.	.	.	.	.	.	.	.	.
11338	19q13.42	19	56172539	56172539	C	T	C>T	U2AF2	exonic	nonsynonymous SNV	DDD4K.04142	DDD_2017	28135719	4293	0	exome	Developmental Delay (DD)	psychiatric disorder	validated	.	non-ssc	.	U2AF2:NM_001012478:exon5:c.C470T:p.P157L,U2AF2:NM_007279:exon5:c.C470T:p.P157L	.	.	.	.	.	.	.	.	.	.	.	.	.	.	.	.	.	.	.	.	.	.	.	.	.	.
11338	19q13.42	19	56179885	56179885	C	T	C>T	U2AF2	exonic	nonsynonymous SNV	DDD4K.02386	DDD_2017	28135719	4293	0	exome	Developmental Delay (DD)	psychiatric disorder	validated	.	non-ssc	.	U2AF2:NM_001012478:exon8:c.C755T:p.T252I,U2AF2:NM_007279:exon8:c.C755T:p.T252I	.	.	.	.	.	.	.	.	.	.	.	.	.	.	.	.	.	.	.	.	.	.	.	.	.	.
5178	19q13.43	19	57325806	57325806	T	C	T>C	PEG3	exonic	nonsynonymous SNV	DDD4K.01708	DDD_2017	28135719	4293	0	exome	Developmental Delay (DD)	psychiatric disorder	validated	.	non-ssc	.	PEG3:NM_001146186:exon7:c.A4004G:p.K1335R,PEG3:NM_001146184:exon9:c.A4004G:p.K1335R,PEG3:NM_001146185:exon9:c.A3626G:p.K1209R,PEG3:NM_001146187:exon9:c.A3632G:p.K1211R,PEG3:NM_006210:exon10:c.A4004G:p.K1335R	.	.	.	.	.	.	.	.	.	.	.	.	.	.	.	.	.	.	.	.	.	.	.	.	.	.
162972	19q13.43	19	58059287	58059287	C	T	C>T	ZNF550	exonic	nonsynonymous SNV	DDD4K.00416	DDD_2017	28135719	4293	0	exome	Developmental Delay (DD)	psychiatric disorder	validated	.	non-ssc	.	ZNF550:NM_001277090:exon4:c.G325A:p.G109R,ZNF550:NM_001277091:exon4:c.G325A:p.G109R,ZNF550:NM_001277092:exon4:c.G325A:p.G109R,ZNF550:NM_001277093:exon4:c.G325A:p.G109R	.	.	.	.	.	.	.	.	.	.	.	.	.	.	.	.	.	.	.	.	.	.	.	.	.	.
23040	2p25.3	2	1915795	1915795	C	T	C>T	MYT1L	exonic	nonsynonymous SNV	DDD4K.01010	DDD_2017	28135719	4293	0	exome	Developmental Delay (DD)	psychiatric disorder	validated	.	non-ssc	.	MYT1L:NM_001303052:exon12:c.G1706A:p.R569Q,MYT1L:NM_001329845:exon12:c.G1706A:p.R569Q,MYT1L:NM_001329846:exon12:c.G1700A:p.R567Q,MYT1L:NM_001329847:exon12:c.G1700A:p.R567Q,MYT1L:NM_001329848:exon12:c.G1700A:p.R567Q,MYT1L:NM_001329849:exon12:c.G1700A:p.R567Q,MYT1L:NM_001329851:exon12:c.G1706A:p.R569Q,MYT1L:NM_001329852:exon12:c.G1700A:p.R567Q,MYT1L:NM_015025:exon12:c.G1700A:p.R567Q,MYT1L:NM_001329…	.	.	.	.	.	.	.	.	.	.	.	.	.	.	.	.	.	.	.	.	.	.	Likely pathogenic	not_provided	RCV000224698.1	MedGen
23040	2p25.3	2	1915823	1915823	G	A	G>A	MYT1L	exonic	nonsynonymous SNV	DDD4K.03067	DDD_2017	28135719	4293	0	exome	Developmental Delay (DD)	psychiatric disorder	validated	.	non-ssc	.	MYT1L:NM_001303052:exon12:c.C1678T:p.H560Y,MYT1L:NM_001329845:exon12:c.C1678T:p.H560Y,MYT1L:NM_001329846:exon12:c.C1672T:p.H558Y,MYT1L:NM_001329847:exon12:c.C1672T:p.H558Y,MYT1L:NM_001329848:exon12:c.C1672T:p.H558Y,MYT1L:NM_001329849:exon12:c.C1672T:p.H558Y,MYT1L:NM_001329851:exon12:c.C1678T:p.H560Y,MYT1L:NM_001329852:exon12:c.C1672T:p.H558Y,MYT1L:NM_015025:exon12:c.C1672T:p.H558Y,MYT1L:NM_001329…	.	.	.	.	.	.	.	.	.	.	.	.	.	.	.	.	.	.	.	.	.	.	.	.	.	.
8853	2p25.1	2	9528552	9528552	A	G	A>G	ASAP2	exonic	nonsynonymous SNV	DDD4K.01793	DDD_2017	28135719	4293	0	exome	Developmental Delay (DD)	psychiatric disorder	validated	.	non-ssc	.	ASAP2:NM_001135191:exon22:c.A2260G:p.M754V,ASAP2:NM_003887:exon22:c.A2260G:p.M754V	.	.	.	.	.	.	.	.	.	.	.	.	.	.	.	.	.	.	.	.	.	.	.	.	.	.
4613	2p24.3	2	16085972	16085972	G	A	G>A	MYCN	exonic	nonsynonymous SNV	DDD4K.02712	DDD_2017	28135719	4293	0	exome	Developmental Delay (DD)	psychiatric disorder	validated	.	non-ssc	.	MYCN:NM_001293231:exon2:c.G515A:p.R172H,MYCN:NM_001293228:exon3:c.G1148A:p.R383H,MYCN:NM_005378:exon3:c.G1148A:p.R383H	.	.	.	.	.	.	.	.	.	.	.	.	.	.	.	.	.	.	.	.	.	.	.	.	.	.
4148	2p24.1	2	20205934	20205934	G	A	G>A	MATN3	exonic	nonsynonymous SNV	DDD4K.04007	DDD_2017	28135719	4293	0	exome	Developmental Delay (DD)	psychiatric disorder	validated	.	non-ssc	.	MATN3:NM_002381:exon2:c.C361T:p.R121W	.	.	.	.	.	.	.	.	.	.	.	.	.	.	.	.	.	.	.	rs104893637	.	.	Pathogenic	Multiple_epiphyseal_dysplasia_5	RCV000007977.2	MedGen:OMIM:Orphanet
100129278	2p24.1	2	21361294	21361294	G	A	G>A	TDRD15	exonic	nonsynonymous SNV	DDD4K.03312	DDD_2017	28135719	4293	0	exome	Developmental Delay (DD)	psychiatric disorder	validated	.	non-ssc	.	TDRD15:NM_001306137:exon4:c.G955A:p.V319I	.	.	.	.	.	.	.	.	.	.	.	.	.	.	.	.	.	.	.	.	.	.	.	.	.	.
54454	2p23.3	2	24046416	24046416	C	G	C>G	ATAD2B	exonic	nonsynonymous SNV	DDD4K.01795	DDD_2017	28135719	4293	0	exome	Developmental Delay (DD)	psychiatric disorder	validated	.	non-ssc	.	ATAD2B:NM_001242338:exon16:c.G1843C:p.A615P,ATAD2B:NM_017552:exon16:c.G1843C:p.A615P	.	.	.	.	.	.	.	.	.	.	.	.	.	.	.	.	.	.	.	.	.	.	.	.	.	.
1788	2p23.3	2	25462080	25462080	T	C	T>C	DNMT3A	exonic	nonsynonymous SNV	DDD4K.00598	DDD_2017	28135719	4293	0	exome	Developmental Delay (DD)	psychiatric disorder	validated	.	non-ssc	.	DNMT3A:NM_001320893:exon15:c.A1871G:p.N624S,DNMT3A:NM_153759:exon16:c.A1760G:p.N587S,DNMT3A:NM_022552:exon20:c.A2327G:p.N776S,DNMT3A:NM_175629:exon20:c.A2327G:p.N776S	.	.	.	.	.	.	.	.	.	.	.	.	.	.	.	.	.	.	.	.	.	.	.	.	.	.
1788	2p23.3	2	25470582	25470582	C	T	C>T	DNMT3A	exonic	nonsynonymous SNV	DDD4K.00244	DDD_2017	28135719	4293	0	exome	Developmental Delay (DD)	psychiatric disorder	validated	.	non-ssc	.	DNMT3A:NM_001320893:exon3:c.G436A:p.G146R,DNMT3A:NM_153759:exon4:c.G325A:p.G109R,DNMT3A:NM_022552:exon8:c.G892A:p.G298R,DNMT3A:NM_175629:exon8:c.G892A:p.G298R	.	.	.	.	.	.	.	.	.	.	.	.	.	.	.	.	.	.	.	.	.	.	.	.	.	.
150946	2p23.3	2	26409069	26409069	G	C	G>C	GAREM2	exonic	nonsynonymous SNV	DDD4K.00027	DDD_2017	28135719	4293	0	exome	Developmental Delay (DD)	psychiatric disorder	validated	.	non-ssc	.	GAREM2:NM_001191033:exon4:c.G1209C:p.E403D,GAREM2:NM_001168241:exon5:c.G1440C:p.E480D	.	.	.	.	.	.	.	.	.	.	.	.	.	.	.	.	.	.	.	.	.	.	.	.	.	.
92749	2p23.3	2	26671570	26671570	G	A	G>A	DRC1	exonic	nonsynonymous SNV	DDD4K.04171	DDD_2017	28135719	4293	0	exome	Developmental Delay (DD)	psychiatric disorder	validated	.	non-ssc	.	DRC1:NM_145038:exon11:c.G1408A:p.A470T	.	.	.	.	.	.	.	.	.	.	.	.	.	.	.	.	.	.	.	.	.	.	.	.	.	.
3777	2p23.3	2	26950615	26950615	C	G	C>G	KCNK3	exonic	nonsynonymous SNV	DDD4K.03474	DDD_2017	28135719	4293	0	exome	Developmental Delay (DD)	psychiatric disorder	validated	.	non-ssc	.	KCNK3:NM_002246:exon2:c.C364G:p.L122V	.	.	.	.	.	.	.	.	.	.	.	.	.	.	.	.	.	.	.	.	.	.	.	.	.	.
3777	2p23.3	2	26950637	26950637	G	A	G>A	KCNK3	exonic	nonsynonymous SNV	DDD4K.01134	DDD_2017	28135719	4293	0	exome	Developmental Delay (DD)	psychiatric disorder	validated	.	non-ssc	.	KCNK3:NM_002246:exon2:c.G386A:p.G129D	.	.	.	.	.	.	.	.	.	.	.	.	.	.	.	.	.	.	.	.	.	.	.	.	.	.
3777	2p23.3	2	26950649	26950649	A	G	A>G	KCNK3	exonic	nonsynonymous SNV	DDD4K.02144	DDD_2017	28135719	4293	0	exome	Developmental Delay (DD)	psychiatric disorder	validated	.	non-ssc	.	KCNK3:NM_002246:exon2:c.A398G:p.N133S	.	.	.	.	.	.	.	.	.	.	.	.	.	.	.	.	.	.	.	.	.	.	.	.	.	.
56896	2p23.3	2	27121488	27121488	G	A	G>A	DPYSL5	exonic	nonsynonymous SNV	DDD4K.01837	DDD_2017	28135719	4293	0	exome	Developmental Delay (DD)	psychiatric disorder	validated	.	non-ssc	.	DPYSL5:NM_001253723:exon2:c.G121A:p.E41K,DPYSL5:NM_001253724:exon2:c.G121A:p.E41K,DPYSL5:NM_020134:exon2:c.G121A:p.E41K	.	.	.	.	.	.	.	.	.	.	.	.	.	.	.	.	.	.	.	rs866373727	COSM2912885	1(skin)	.	.	.	.
56896	2p23.3	2	27121608	27121608	G	A	G>A	DPYSL5	exonic	nonsynonymous SNV	DDD4K.02542	DDD_2017	28135719	4293	0	exome	Developmental Delay (DD)	psychiatric disorder	validated	.	non-ssc	.	DPYSL5:NM_001253723:exon2:c.G241A:p.D81N,DPYSL5:NM_001253724:exon2:c.G241A:p.D81N,DPYSL5:NM_020134:exon2:c.G241A:p.D81N	.	.	.	.	.	.	3.36e-05	9.63e-05	0	0	0	3.03e-05	0	6.72e-05	0.0001	0.0002	.	.	.	rs150180865	.	.	.	.	.	.
3795	2p23.3	2	27322541	27322541	G	A	G>A	KHK	exonic	nonsynonymous SNV	DDD4K.01253	DDD_2017	28135719	4293	0	exome	Developmental Delay (DD)	psychiatric disorder	validated	.	non-ssc	.	KHK:NM_000221:exon8:c.G820A:p.V274M,KHK:NM_006488:exon8:c.G820A:p.V274M	0.0006	.	.	.	0.003	.	0.0011	9.64e-05	0	0	0.0122	0.0008	0.0044	6.07e-05	0.0005	0.0002	0.0007	.	.	rs138164728	.	.	Uncertain significance	Fructosuria\x2c_essential	RCV000359429.1	MedGen:OMIM
8884	2p23.3	2	27428308	27428308	A	G	A>G	SLC5A6	exonic	nonsynonymous SNV	DDD4K.02067	DDD_2017	28135719	4293	0	exome	Developmental Delay (DD)	psychiatric disorder	validated	.	non-ssc	.	SLC5A6:NM_021095:exon7:c.T644C:p.L215P	.	.	.	.	.	.	.	.	.	.	.	.	.	.	.	.	.	.	.	.	.	.	.	.	.	.
7781	2p23.3	2	27478190	27478190	G	C	G>C	SLC30A3	exonic	nonsynonymous SNV	DDD4K.00195	DDD_2017	28135719	4293	0	exome	Developmental Delay (DD)	psychiatric disorder	validated	.	non-ssc	.	SLC30A3:NM_001318951:exon8:c.C1118G:p.P373R,SLC30A3:NM_003459:exon8:c.C1157G:p.P386R,SLC30A3:NM_001318949:exon9:c.C1142G:p.P381R,SLC30A3:NM_001318950:exon9:c.C1118G:p.P373R	.	.	.	.	.	.	.	.	.	.	.	.	.	.	.	.	.	.	.	.	.	.	.	.	.	.
5500	2p23.2	2	28999810	28999810	C	G	C>G	PPP1CB	exonic	nonsynonymous SNV	DDD4K.03742	DDD_2017	28135719	4293	0	exome	Developmental Delay (DD)	psychiatric disorder	validated	.	non-ssc	.	PPP1CB:NM_002709:exon2:c.C146G:p.P49R,PPP1CB:NM_206876:exon3:c.C146G:p.P49R	.	.	.	.	.	.	.	.	.	.	.	.	.	.	.	.	.	.	.	.	.	.	Pathogenic	not_provided	RCV000257986.1	MedGen
5500	2p23.2	2	29001687	29001687	G	A	G>A	PPP1CB	exonic	nonsynonymous SNV	DDD4K.01773	DDD_2017	28135719	4293	0	exome	Developmental Delay (DD)	psychiatric disorder	validated	.	non-ssc	.	PPP1CB:NM_002709:exon3:c.G197A:p.G66E,PPP1CB:NM_206876:exon4:c.G197A:p.G66E	.	.	.	.	.	.	.	.	.	.	.	.	.	.	.	.	.	.	.	.	.	.	.	.	.	.
5500	2p23.2	2	29016735	29016735	G	A	G>A	PPP1CB	exonic	nonsynonymous SNV	DDD4K.04288	DDD_2017	28135719	4293	0	exome	Developmental Delay (DD)	psychiatric disorder	validated	.	non-ssc	.	PPP1CB:NM_002709:exon7:c.G751A:p.E251K,PPP1CB:NM_206876:exon8:c.G751A:p.E251K	.	.	.	.	.	.	.	.	.	.	.	.	.	.	.	.	.	.	.	.	.	.	.	.	.	.
5500	2p23.2	2	29016759	29016759	A	G	A>G	PPP1CB	exonic	nonsynonymous SNV	DDD4K.00804	DDD_2017	28135719	4293	0	exome	Developmental Delay (DD)	psychiatric disorder	validated	.	non-ssc	.	PPP1CB:NM_002709:exon7:c.A775G:p.K259E,PPP1CB:NM_206876:exon8:c.A775G:p.K259E	.	.	.	.	.	.	.	.	.	.	.	.	.	.	.	.	.	.	.	.	.	.	.	.	.	.
6683	2p22.3	2	32379489	32379489	T	G	T>G	SPAST	exonic	nonsynonymous SNV	DDD4K.01932	DDD_2017	28135719	4293	0	exome	Developmental Delay (DD)	psychiatric disorder	validated	.	non-ssc	.	SPAST:NM_199436:exon16:c.T1679G:p.I560R,SPAST:NM_014946:exon17:c.T1775G:p.I592R	.	.	.	.	.	.	.	.	.	.	.	.	.	.	.	.	.	.	.	.	.	.	.	.	.	.
55622	2p22.3	2	32927917	32927917	C	T	C>T	TTC27	exonic	nonsynonymous SNV	DDD4K.03217	DDD_2017	28135719	4293	0	exome	Developmental Delay (DD)	psychiatric disorder	validated	.	non-ssc	.	TTC27:NM_001193509:exon10:c.C1013T:p.A338V,TTC27:NM_017735:exon10:c.C1163T:p.A388V	.	.	.	.	.	.	8.24e-06	0	8.64e-05	0	0	0	0	0	.	.	.	.	.	rs752406731	.	.	.	.	.	.
344387	2p22.1	2	39405816	39405816	T	G	T>G	CDKL4	exonic	nonsynonymous SNV	DDD4K.00255	DDD_2017	28135719	4293	0	exome	Developmental Delay (DD)	psychiatric disorder	validated	.	non-ssc	.	CDKL4:NM_001346911:exon9:c.A1012C:p.N338H	.	.	.	.	.	.	.	.	.	.	.	.	.	.	.	.	.	.	.	.	.	.	.	.	.	.
80204	2p16.3	2	48035312	48035312	T	C	T>C	FBXO11	exonic	nonsynonymous SNV	DDD4K.02130	DDD_2017	28135719	4293	0	exome	Developmental Delay (DD)	psychiatric disorder	validated	.	non-ssc	.	FBXO11:NM_001190274:exon23:c.A2729G:p.D910G,FBXO11:NM_025133:exon23:c.A2477G:p.D826G	.	.	.	.	.	.	.	.	.	.	.	.	.	.	.	.	.	.	.	.	.	.	.	.	.	.
80204	2p16.3	2	48047551	48047551	T	C	T>C	FBXO11	exonic	nonsynonymous SNV	DDD4K.01857	DDD_2017	28135719	4293	0	exome	Developmental Delay (DD)	psychiatric disorder	validated	.	non-ssc	.	FBXO11:NM_001190274:exon14:c.A1747G:p.I583V,FBXO11:NM_025133:exon14:c.A1495G:p.I499V	.	.	.	.	.	.	1.66e-05	0	0	0	0	3.01e-05	0	0	.	.	.	.	.	rs764186807	.	.	.	.	.	.
80204	2p16.3	2	48066586	48066586	T	A	T>A	FBXO11	exonic	nonsynonymous SNV	DDD4K.02943	DDD_2017	28135719	4293	0	exome	Developmental Delay (DD)	psychiatric disorder	validated	.	non-ssc	.	FBXO11:NM_001190274:exon3:c.A414T:p.R138S,FBXO11:NM_025133:exon3:c.A162T:p.R54S	.	.	.	.	.	.	.	.	.	.	.	.	.	.	.	.	.	.	.	.	.	.	.	.	.	.
2492	2p16.3	2	49295415	49295415	G	A	G>A	FSHR	exonic	nonsynonymous SNV	DDD4K.04287	DDD_2017	28135719	4293	0	exome	Developmental Delay (DD)	psychiatric disorder	validated	.	non-ssc	.	FSHR:NM_000145:exon2:c.C167T:p.T56I,FSHR:NM_181446:exon2:c.C167T:p.T56I	.	.	.	.	.	.	.	.	.	.	.	.	.	.	.	.	.	.	.	.	.	.	.	.	.	.
7444	2p16.1	2	58366887	58366887	C	G	C>G	VRK2	exonic	nonsynonymous SNV	DDD4K.02618	DDD_2017	28135719	4293	0	exome	Developmental Delay (DD)	psychiatric disorder	validated	.	non-ssc	.	VRK2:NM_001288839:exon10:c.C589G:p.P197A,VRK2:NM_001130480:exon11:c.C943G:p.P315A,VRK2:NM_001130481:exon11:c.C943G:p.P315A,VRK2:NM_001130482:exon11:c.C874G:p.P292A,VRK2:NM_001130483:exon11:c.C943G:p.P315A,VRK2:NM_006296:exon11:c.C943G:p.P315A,VRK2:NM_001288836:exon12:c.C589G:p.P197A,VRK2:NM_001288838:exon13:c.C943G:p.P315A,VRK2:NM_001288837:exon14:c.C943G:p.P315A	.	.	.	.	.	.	.	.	.	.	.	.	.	.	.	.	.	.	.	.	.	.	.	.	.	.
53335	2p16.1	2	60773293	60773293	G	T	G>T	BCL11A	exonic	nonsynonymous SNV	DDD4K.03300	DDD_2017	28135719	4293	0	exome	Developmental Delay (DD)	psychiatric disorder	validated	.	non-ssc	.	BCL11A:NM_018014:exon2:c.C198A:p.H66Q,BCL11A:NM_022893:exon2:c.C198A:p.H66Q,BCL11A:NM_138559:exon2:c.C198A:p.H66Q	.	.	.	.	.	.	.	.	.	.	.	.	.	.	.	.	.	.	.	.	.	.	Pathogenic	INTELLECTUAL_DEVELOPMENTAL_DISORDER_WITH_PERSISTENCE_OF_FETAL_HEMOGLOBIN	RCV000240572.2	MedGen:OMIM
53335	2p16.1	2	60773348	60773348	C	A	C>A	BCL11A	exonic	nonsynonymous SNV	DDD4K.02412	DDD_2017	28135719	4293	0	exome	Developmental Delay (DD)	psychiatric disorder	validated	.	non-ssc	.	BCL11A:NM_018014:exon2:c.G143T:p.C48F,BCL11A:NM_022893:exon2:c.G143T:p.C48F,BCL11A:NM_138559:exon2:c.G143T:p.C48F	.	.	.	.	.	.	.	.	.	.	.	.	.	.	.	.	.	.	.	.	.	.	Pathogenic	INTELLECTUAL_DEVELOPMENTAL_DISORDER_WITH_PERSISTENCE_OF_FETAL_HEMOGLOBIN	RCV000240280.2	MedGen:OMIM
53335	2p16.1	2	60773352	60773352	T	G	T>G	BCL11A	exonic	nonsynonymous SNV	DDD4K.02839	DDD_2017	28135719	4293	0	exome	Developmental Delay (DD)	psychiatric disorder	validated	.	non-ssc	.	BCL11A:NM_018014:exon2:c.A139C:p.T47P,BCL11A:NM_022893:exon2:c.A139C:p.T47P,BCL11A:NM_138559:exon2:c.A139C:p.T47P	.	.	.	.	.	.	.	.	.	.	.	.	.	.	.	.	.	.	.	.	.	.	Pathogenic	INTELLECTUAL_DEVELOPMENTAL_DISORDER_WITH_PERSISTENCE_OF_FETAL_HEMOGLOBIN	RCV000239897.2	MedGen:OMIM
54980	2p13.3	2	70406687	70406687	T	C	T>C	C2orf42	exonic	nonsynonymous SNV	DDD4K.04209	DDD_2017	28135719	4293	0	exome	Developmental Delay (DD)	psychiatric disorder	validated	.	non-ssc	.	C2orf42:NM_001348762:exon3:c.A911G:p.K304R,C2orf42:NM_001348758:exon4:c.A911G:p.K304R,C2orf42:NM_001348759:exon4:c.A911G:p.K304R,C2orf42:NM_001348760:exon4:c.A911G:p.K304R,C2orf42:NM_001348761:exon4:c.A911G:p.K304R,C2orf42:NM_001348763:exon4:c.A911G:p.K304R,C2orf42:NM_001348764:exon4:c.A911G:p.K304R,C2orf42:NM_017880:exon4:c.A911G:p.K304R	.	.	.	.	.	.	.	.	.	.	.	.	.	.	.	.	.	.	.	.	.	.	.	.	.	.
56603	2p13.2	2	72371122	72371122	C	A	C>A	CYP26B1	exonic	nonsynonymous SNV	DDD4K.01398	DDD_2017	28135719	4293	0	exome	Developmental Delay (DD)	psychiatric disorder	validated	.	non-ssc	.	CYP26B1:NM_019885:exon2:c.G425T:p.R142L	.	.	.	.	.	.	.	.	.	.	.	.	.	.	.	.	.	.	.	.	.	.	.	.	.	.
1768	2p11.2	2	84896626	84896626	G	C	G>C	DNAH6	exonic	nonsynonymous SNV	DDD4K.03533	DDD_2017	28135719	4293	0	exome	Developmental Delay (DD)	psychiatric disorder	validated	.	non-ssc	.	DNAH6:NM_001370:exon38:c.G6298C:p.V2100L	.	.	.	.	.	.	.	.	.	.	.	.	.	.	.	.	.	.	.	.	.	.	.	.	.	.
23020	2q11.2	2	96955604	96955604	T	C	T>C	SNRNP200	exonic	nonsynonymous SNV	DDD4K.01412	DDD_2017	28135719	4293	0	exome	Developmental Delay (DD)	psychiatric disorder	validated	.	non-ssc	.	SNRNP200:NM_014014:exon21:c.A2873G:p.H958R	.	.	.	.	.	.	.	.	.	.	.	.	.	.	.	.	.	.	.	.	.	.	.	.	.	.
3899	2q11.2	2	100368751	100368751	G	A	G>A	AFF3	exonic	nonsynonymous SNV	DDD4K.02567	DDD_2017	28135719	4293	0	exome	Developmental Delay (DD)	psychiatric disorder	validated	.	non-ssc	.	AFF3:NM_001025108:exon8:c.C1009T:p.L337F,AFF3:NM_002285:exon8:c.C934T:p.L312F	.	.	.	.	.	.	.	.	.	.	.	.	.	.	.	.	.	.	.	.	.	.	.	.	.	.
3899	2q11.2	2	100623270	100623270	C	A	C>A	AFF3	exonic	nonsynonymous SNV	DDD4K.00047	DDD_2017	28135719	4293	0	exome	Developmental Delay (DD)	psychiatric disorder	validated	.	non-ssc	.	AFF3:NM_001025108:exon6:c.G772T:p.A258S,AFF3:NM_002285:exon6:c.G697T:p.A233S	.	.	.	.	.	.	.	.	.	.	.	.	.	.	.	.	.	.	.	.	.	.	.	.	.	.
5455	2q12.1	2	105473053	105473053	G	T	G>T	POU3F3	exonic	nonsynonymous SNV	DDD4K.04269	DDD_2017	28135719	4293	0	exome	Developmental Delay (DD)	psychiatric disorder	validated	.	non-ssc	.	POU3F3:NM_006236:exon1:c.G1085T:p.R362L	.	.	.	.	.	.	.	.	.	.	.	.	.	.	.	.	.	.	.	.	.	.	.	.	.	.
5455	2q12.1	2	105473053	105473053	G	T	G>T	POU3F3	exonic	nonsynonymous SNV	DDD4K.03362	DDD_2017	28135719	4293	0	exome	Developmental Delay (DD)	psychiatric disorder	validated	.	non-ssc	.	POU3F3:NM_006236:exon1:c.G1085T:p.R362L	.	.	.	.	.	.	.	.	.	.	.	.	.	.	.	.	.	.	.	.	.	.	.	.	.	.
84910	2q13	2	112824529	112824529	A	G	A>G	TMEM87B	exonic	nonsynonymous SNV	DDD4K.03172	DDD_2017	28135719	4293	0	exome	Developmental Delay (DD)	psychiatric disorder	validated	.	non-ssc	.	TMEM87B:NM_001329914:exon4:c.A335G:p.H112R,TMEM87B:NM_032824:exon4:c.A335G:p.H112R	.	.	.	.	.	.	.	.	.	.	.	.	.	.	.	.	.	.	.	.	.	.	.	.	.	.
339761	2q14.3	2	127950795	127950795	G	A	G>A	CYP27C1	exonic	nonsynonymous SNV	DDD4K.02487	DDD_2017	28135719	4293	0	exome	Developmental Delay (DD)	psychiatric disorder	validated	.	non-ssc	.	CYP27C1:NM_001001665:exon7:c.C877T:p.R293C	.	.	.	.	.	.	.	.	.	.	.	.	.	.	.	.	.	.	.	.	COSM4675915	1(large_intestine)	.	.	.	.
339761	2q14.3	2	127950842	127950842	G	A	G>A	CYP27C1	exonic	nonsynonymous SNV	DDD4K.00867	DDD_2017	28135719	4293	0	exome	Developmental Delay (DD)	psychiatric disorder	validated	.	non-ssc	.	CYP27C1:NM_001001665:exon7:c.C830T:p.S277L	.	.	.	.	.	.	.	.	.	.	.	.	.	.	.	.	.	.	.	.	.	.	.	.	.	.
4249	2q21.3	2	135180458	135180458	G	C	G>C	MGAT5	exonic	nonsynonymous SNV	DDD4K.03263	DDD_2017	28135719	4293	0	exome	Developmental Delay (DD)	psychiatric disorder	validated	.	non-ssc	.	MGAT5:NM_002410:exon13:c.G1762C:p.E588Q	.	.	.	.	.	.	.	.	.	.	.	.	.	.	.	.	.	.	.	.	.	.	.	.	.	.
53353	2q22.1	2	141093381	141093381	G	T	G>T	LRP1B	exonic	nonsynonymous SNV	DDD4K.03424	DDD_2017	28135719	4293	0	exome	Developmental Delay (DD)	psychiatric disorder	validated	.	non-ssc	.	LRP1B:NM_018557:exon78:c.C11919A:p.D3973E	.	.	.	.	.	.	.	.	.	.	.	.	.	.	.	.	.	.	.	.	.	.	.	.	.	.
53353	2q22.1	2	141245238	141245238	C	T	C>T	LRP1B	exonic	nonsynonymous SNV	DDD4K.01611	DDD_2017	28135719	4293	0	exome	Developmental Delay (DD)	psychiatric disorder	validated	.	non-ssc	.	LRP1B:NM_018557:exon58:c.G9191A:p.R3064Q	.	.	.	.	.	.	.	.	.	.	.	.	.	.	.	.	.	.	.	.	COSM4991587	1(skin)	.	.	.	.
53353	2q22.1	2	141298596	141298596	C	G	C>G	LRP1B	exonic	nonsynonymous SNV	DDD4K.03357	DDD_2017	28135719	4293	0	exome	Developmental Delay (DD)	psychiatric disorder	validated	.	non-ssc	.	LRP1B:NM_018557:exon45:c.G7459C:p.V2487L	.	.	.	.	.	.	.	.	.	.	.	.	.	.	.	.	.	.	.	.	.	.	.	.	.	.
53353	2q22.1	2	141459806	141459806	A	G	A>G	LRP1B	exonic	nonsynonymous SNV	DDD4K.02157	DDD_2017	28135719	4293	0	exome	Developmental Delay (DD)	psychiatric disorder	validated	.	non-ssc	.	LRP1B:NM_018557:exon39:c.T6206C:p.L2069P	.	.	.	.	.	.	.	.	.	.	.	.	.	.	.	.	.	.	.	.	.	.	.	.	.	.
53353	2q22.1	2	141625794	141625794	C	T	C>T	LRP1B	exonic	nonsynonymous SNV	DDD4K.04135	DDD_2017	28135719	4293	0	exome	Developmental Delay (DD)	psychiatric disorder	validated	.	non-ssc	.	LRP1B:NM_018557:exon26:c.G4208A:p.R1403H	.	.	.	.	.	.	3.3e-05	9.62e-05	8.73e-05	0	0	3e-05	0	0	0.0001	.	0.0001	.	.	rs370510413	.	.	.	.	.	.
3800	2q23.1	2	149803532	149803532	G	A	G>A	KIF5C	exonic	nonsynonymous SNV	DDD4K.00394	DDD_2017	28135719	4293	0	exome	Developmental Delay (DD)	psychiatric disorder	validated	.	non-ssc	.	KIF5C:NM_004522:exon8:c.G709A:p.E237K	.	.	.	.	.	.	.	.	.	.	.	.	.	.	.	.	.	.	.	.	.	.	Pathogenic|Pathogenic	Cortical_dysplasia\x2c_complex\x2c_with_other_brain_malformations_2|not_provided	RCV000128852.2|RCV000254976.1	MedGen:OMIM|MedGen
85461	2q24.2	2	160019902	160019902	G	A	G>A	TANC1	exonic	nonsynonymous SNV	DDD4K.01750	DDD_2017	28135719	4293	0	exome	Developmental Delay (DD)	psychiatric disorder	validated	.	non-ssc	.	TANC1:NM_001145909:exon8:c.G788A:p.R263H,TANC1:NM_001350064:exon8:c.G791A:p.R264H,TANC1:NM_033394:exon8:c.G791A:p.R264H,TANC1:NM_001350065:exon9:c.G791A:p.R264H	0.0002	.	.	.	.	0.001	4.14e-05	0.0001	0	0	0	0	0.0011	0.0002	.	.	.	.	.	rs201686520	.	.	.	.	.	.
85461	2q24.2	2	160085377	160085377	A	T	A>T	TANC1	exonic	nonsynonymous SNV	DDD4K.02797	DDD_2017	28135719	4293	0	exome	Developmental Delay (DD)	psychiatric disorder	validated	.	non-ssc	.	TANC1:NM_001350062:exon23:c.A3518T:p.Y1173F,TANC1:NM_001350063:exon24:c.A3752T:p.Y1251F,TANC1:NM_001145909:exon26:c.A4097T:p.Y1366F,TANC1:NM_001350064:exon26:c.A4100T:p.Y1367F,TANC1:NM_033394:exon26:c.A4121T:p.Y1374F,TANC1:NM_001350065:exon27:c.A4100T:p.Y1367F	.	.	.	.	.	.	.	.	.	.	.	.	.	.	.	.	.	.	.	.	.	.	.	.	.	.
4065;100526664	2q24.2	2	160667123	160667123	C	T	C>T	LY75;LY75-CD302	exonic	nonsynonymous SNV	DDD4K.01685	DDD_2017	28135719	4293	0	exome	Developmental Delay (DD)	psychiatric disorder	validated	.	non-ssc	.	LY75-CD302:NM_001198759:exon32:c.G4613A:p.R1538Q,LY75-CD302:NM_001198760:exon32:c.G4613A:p.R1538Q,LY75:NM_002349:exon32:c.G4613A:p.R1538Q	.	.	.	.	.	.	1.65e-05	0	0	0.0002	0	0	0	0	.	.	.	.	.	rs749646788	COSM4085903	1(stomach)	.	.	.	.
6328	2q24.3	2	165986748	165986748	A	G	A>G	SCN3A	exonic	nonsynonymous SNV	DDD4K.02917	DDD_2017	28135719	4293	0	exome	Developmental Delay (DD)	psychiatric disorder	validated	.	non-ssc	.	SCN3A:NM_001081676:exon17:c.T2477C:p.I826T,SCN3A:NM_001081677:exon17:c.T2477C:p.I826T,SCN3A:NM_006922:exon17:c.T2624C:p.I875T	.	.	.	.	.	.	.	.	.	.	.	.	.	.	.	.	.	.	.	.	COSM4599125;COSM4599126	1(upper_aerodigestive_tract)	Likely pathogenic|Likely pathogenic	Developmental_delay|Polymicrogyria	RCV000415038.1|RCV000415038.1	MedGen|Human_Phenotype_Ontology:MedGen:Orphanet
6326	2q24.3	2	166188005	166188005	A	G	A>G	SCN2A	exonic	nonsynonymous SNV	DDD4K.02938	DDD_2017	28135719	4293	0	exome	Developmental Delay (DD)	psychiatric disorder	validated	.	non-ssc	.	SCN2A:NM_001040143:exon13:c.A2315G:p.N772S,SCN2A:NM_001040142:exon14:c.A2315G:p.N772S,SCN2A:NM_021007:exon14:c.A2315G:p.N772S	.	.	.	.	.	.	.	.	.	.	.	.	.	.	.	.	.	.	.	.	.	.	.	.	.	.
6326	2q24.3	2	166210714	166210714	T	C	T>C	SCN2A	exonic	nonsynonymous SNV	DDD4K.03538	DDD_2017	28135719	4293	0	exome	Developmental Delay (DD)	psychiatric disorder	validated	.	non-ssc	.	SCN2A:NM_001040143:exon16:c.T2932C:p.F978L,SCN2A:NM_001040142:exon17:c.T2932C:p.F978L,SCN2A:NM_021007:exon17:c.T2932C:p.F978L	.	.	.	.	.	.	.	.	.	.	.	.	.	.	.	.	.	.	.	.	.	.	.	.	.	.
6326	2q24.3	2	166243484	166243484	T	A	T>A	SCN2A	exonic	nonsynonymous SNV	DDD4K.02124	DDD_2017	28135719	4293	0	exome	Developmental Delay (DD)	psychiatric disorder	validated	.	non-ssc	.	SCN2A:NM_001040143:exon25:c.T4780A:p.W1594R,SCN2A:NM_001040142:exon26:c.T4780A:p.W1594R,SCN2A:NM_021007:exon26:c.T4780A:p.W1594R	.	.	.	.	.	.	.	.	.	.	.	.	.	.	.	.	.	.	.	.	.	.	.	.	.	.
6326	2q24.3	2	166245954	166245954	G	A	G>A	SCN2A	exonic	nonsynonymous SNV	DDD4K.01686	DDD_2017	28135719	4293	0	exome	Developmental Delay (DD)	psychiatric disorder	validated	.	non-ssc	.	SCN2A:NM_001040143:exon26:c.G5638A:p.E1880K,SCN2A:NM_001040142:exon27:c.G5638A:p.E1880K,SCN2A:NM_021007:exon27:c.G5638A:p.E1880K	.	.	.	.	.	.	.	.	.	.	.	.	.	.	.	.	.	.	.	.	.	.	.	.	.	.
6323	2q24.3	2	166848020	166848020	A	C	A>C	SCN1A	exonic	nonsynonymous SNV	DDD4K.03217	DDD_2017	28135719	4293	0	exome	Developmental Delay (DD)	psychiatric disorder	validated	.	non-ssc	.	SCN1A:NM_001165963:exon26:c.T5765G:p.I1922S,SCN1A:NM_001165964:exon26:c.T5681G:p.I1894S,SCN1A:NM_006920:exon26:c.T5732G:p.I1911S,SCN1A:NM_001202435:exon28:c.T5765G:p.I1922S	.	.	.	.	.	.	.	.	.	.	.	.	.	.	.	.	.	.	.	.	.	.	Uncertain significance\x2cnot provided|Likely pathogenic	Early_infantile_epileptic_encephalopathy\x2cSevere_myoclonic_epilepsy_in_infancy|not_provided	RCV000466422.1\x2cRCV000059449.1|RCV000189020.1	MedGen:Orphanet\x2cMedGen:OMIM:SNOMED_CT|MedGen
4780	2q31.2	2	178098807	178098807	T	C	T>C	NFE2L2	exonic	nonsynonymous SNV	DDD4K.01376	DDD_2017	28135719	4293	0	exome	Developmental Delay (DD)	psychiatric disorder	validated	.	non-ssc	.	NFE2L2:NM_001145412:exon2:c.A190G:p.T64A,NFE2L2:NM_001145413:exon2:c.A190G:p.T64A,NFE2L2:NM_001313900:exon2:c.A190G:p.T64A,NFE2L2:NM_001313901:exon2:c.A190G:p.T64A,NFE2L2:NM_001313902:exon2:c.A238G:p.T80A,NFE2L2:NM_006164:exon2:c.A238G:p.T80A	.	.	.	.	.	.	.	.	.	.	.	.	.	.	.	.	.	.	.	.	COSM3961573	1(breast);1(oesophagus);1(lung)	.	.	.	.
50940	2q31.2	2	178762796	178762796	T	A	T>A	PDE11A	exonic	nonsynonymous SNV	DDD4K.00388	DDD_2017	28135719	4293	0	exome	Developmental Delay (DD)	psychiatric disorder	validated	.	non-ssc	.	PDE11A:NM_001077358:exon3:c.A217T:p.I73F,PDE11A:NM_016953:exon4:c.A1291T:p.I431F,PDE11A:NM_001077197:exon5:c.A541T:p.I181F	.	.	.	.	.	.	.	.	.	.	.	.	.	.	.	.	.	.	.	.	.	.	.	.	.	.
7273	2q31.2	2	179391992	179391992	A	G	A>G	TTN	exonic	nonsynonymous SNV	DDD4K.00989	DDD_2017	28135719	4293	0	exome	Developmental Delay (DD)	psychiatric disorder	validated	.	non-ssc	.	TTN:NM_003319:exon191:c.T80528C:p.I26843T,TTN:NM_133432:exon192:c.T80903C:p.I26968T,TTN:NM_133437:exon192:c.T81104C:p.I27035T,TTN:NM_133378:exon312:c.T100019C:p.I33340T,TTN:NM_001256850:exon313:c.T102800C:p.I34267T,TTN:NM_001267550:exon363:c.T107723C:p.I35908T	.	.	.	.	.	.	2.57e-05	0	0	0	0	4.65e-05	0	0	.	.	.	.	.	rs769141222	.	.	.	.	.	.
7273	2q31.2	2	179432269	179432269	G	A	G>A	TTN	exonic	nonsynonymous SNV	DDD4K.00686	DDD_2017	28135719	4293	0	exome	Developmental Delay (DD)	psychiatric disorder	validated	.	non-ssc	.	TTN:NM_003319:exon154:c.C51395T:p.P17132L,TTN:NM_133432:exon155:c.C51770T:p.P17257L,TTN:NM_133437:exon155:c.C51971T:p.P17324L,TTN:NM_133378:exon275:c.C70886T:p.P23629L,TTN:NM_001256850:exon276:c.C73667T:p.P24556L,TTN:NM_001267550:exon326:c.C78590T:p.P26197L	.	.	.	.	.	.	.	.	.	.	.	.	.	.	.	.	.	.	.	.	.	.	.	.	.	.
7273	2q31.2	2	179593822	179593822	C	T	C>T	TTN	exonic	nonsynonymous SNV	DDD4K.02035	DDD_2017	28135719	4293	0	exome	Developmental Delay (DD)	psychiatric disorder	validated	.	non-ssc	.	TTN:NM_133378:exon62:c.G15211A:p.V5071M,TTN:NM_001256850:exon63:c.G17992A:p.V5998M,TTN:NM_001267550:exon65:c.G18943A:p.V6315M	.	.	.	.	.	.	8.83e-06	0	0	0.0001	0	0	0	0	.	.	.	.	.	rs770552574	.	.	.	.	.	.
7273	2q31.2	2	179594430	179594430	C	T	C>T	TTN	exonic	nonsynonymous SNV	DDD4K.02607	DDD_2017	28135719	4293	0	exome	Developmental Delay (DD)	psychiatric disorder	validated	.	non-ssc	.	TTN:NM_133378:exon60:c.G14818A:p.A4940T,TTN:NM_001256850:exon61:c.G17599A:p.A5867T,TTN:NM_001267550:exon63:c.G18550A:p.A6184T	.	.	.	.	.	.	0.0005	0	8.66e-05	0	0	0.0007	0	0.0002	0.0005	.	0.0007	.	.	rs72648947	.	.	Uncertain significance|Uncertain significance|Uncertain significance|Uncertain significance	not_specified|Cardiovascular_phenotype|Dilated_cardiomyopathy_1G|Limb-girdle_muscular_dystrophy\x2c_type_2J	RCV000185360.4|RCV000253609.1|RCV000469338.1|RCV000469338.1	MedGen|MedGen|MedGen:OMIM|MedGen:OMIM:Orphanet
7273	2q31.2	2	179621472	179621472	C	G	C>G	TTN	exonic	nonsynonymous SNV	DDD4K.01144	DDD_2017	28135719	4293	0	exome	Developmental Delay (DD)	psychiatric disorder	validated	.	non-ssc	.	TTN:NM_133437:exon44:c.G10218C:p.K3406N,TTN:NM_001267550:exon46:c.G10731C:p.K3577N	.	.	.	.	.	.	.	.	.	.	.	.	.	.	.	.	.	.	.	.	.	.	.	.	.	.
7273	2q31.2	2	179634657	179634657	A	T	A>T	TTN	exonic	nonsynonymous SNV	DDD4K.03410	DDD_2017	28135719	4293	0	exome	Developmental Delay (DD)	psychiatric disorder	validated	.	non-ssc	.	TTN:NM_003319:exon36:c.T8513A:p.I2838N,TTN:NM_133432:exon36:c.T8513A:p.I2838N,TTN:NM_133437:exon36:c.T8513A:p.I2838N,TTN:NM_001256850:exon37:c.T8651A:p.I2884N,TTN:NM_001267550:exon37:c.T8651A:p.I2884N,TTN:NM_133378:exon37:c.T8651A:p.I2884N,TTN:NM_133379:exon37:c.T8651A:p.I2884N	.	.	.	.	.	.	.	.	.	.	.	.	.	.	.	.	.	.	.	.	.	.	.	.	.	.
1281	2q32.2	2	189873705	189873705	G	T	G>T	COL3A1	exonic	nonsynonymous SNV	DDD4K.03820	DDD_2017	28135719	4293	0	exome	Developmental Delay (DD)	psychiatric disorder	validated	.	non-ssc	.	COL3A1:NM_000090:exon48:c.G3581T:p.G1194V	.	.	.	.	.	.	.	.	.	.	.	.	.	.	.	.	.	.	.	.	.	.	.	.	.	.
6775	2q32.2	2	191895725	191895725	G	T	G>T	STAT4	exonic	nonsynonymous SNV	DDD4K.01095	DDD_2017	28135719	4293	0	exome	Developmental Delay (DD)	psychiatric disorder	validated	.	non-ssc	.	STAT4:NM_001243835:exon23:c.C2193A:p.N731K,STAT4:NM_003151:exon23:c.C2193A:p.N731K	.	.	.	.	.	.	.	.	.	.	.	.	.	.	.	.	.	.	.	.	.	.	.	.	.	.
57520	2q32.3	2	197081742	197081742	C	T	C>T	HECW2	exonic	nonsynonymous SNV	DDD4K.02367	DDD_2017	28135719	4293	0	exome	Developmental Delay (DD)	psychiatric disorder	validated	.	non-ssc	.	HECW2:NM_001304840:exon25:c.G3416A:p.R1139K,HECW2:NM_001348768:exon27:c.G4484A:p.R1495K,HECW2:NM_020760:exon27:c.G4484A:p.R1495K	.	.	.	.	.	.	.	.	.	.	.	.	.	.	.	.	.	.	.	.	.	.	.	.	.	.
57520	2q32.3	2	197084836	197084836	T	G	T>G	HECW2	exonic	nonsynonymous SNV	DDD4K.01884	DDD_2017	28135719	4293	0	exome	Developmental Delay (DD)	psychiatric disorder	validated	.	non-ssc	.	HECW2:NM_001304840:exon24:c.A3267C:p.E1089D,HECW2:NM_001348768:exon26:c.A4335C:p.E1445D,HECW2:NM_020760:exon26:c.A4335C:p.E1445D	.	.	.	.	.	.	.	.	.	.	.	.	.	.	.	.	.	.	.	.	.	.	.	.	.	.
57520	2q32.3	2	197090524	197090524	G	A	G>A	HECW2	exonic	nonsynonymous SNV	DDD4K.00675	DDD_2017	28135719	4293	0	exome	Developmental Delay (DD)	psychiatric disorder	validated	.	non-ssc	.	HECW2:NM_001304840:exon21:c.C2920T:p.R974W,HECW2:NM_001348768:exon23:c.C3988T:p.R1330W,HECW2:NM_020760:exon23:c.C3988T:p.R1330W	.	.	.	.	.	.	.	.	.	.	.	.	.	.	.	.	.	.	.	.	.	.	Pathogenic	NEURODEVELOPMENTAL_DISORDER_WITH_HYPOTONIA\x2c_SEIZURES\x2c_AND_ABSENT_LANGUAGE	RCV000415612.1	MedGen:OMIM
57520	2q32.3	2	197090524	197090524	G	A	G>A	HECW2	exonic	nonsynonymous SNV	DDD4K.03187	DDD_2017	28135719	4293	0	exome	Developmental Delay (DD)	psychiatric disorder	validated	.	non-ssc	.	HECW2:NM_001304840:exon21:c.C2920T:p.R974W,HECW2:NM_001348768:exon23:c.C3988T:p.R1330W,HECW2:NM_020760:exon23:c.C3988T:p.R1330W	.	.	.	.	.	.	.	.	.	.	.	.	.	.	.	.	.	.	.	.	.	.	Pathogenic	NEURODEVELOPMENTAL_DISORDER_WITH_HYPOTONIA\x2c_SEIZURES\x2c_AND_ABSENT_LANGUAGE	RCV000415612.1	MedGen:OMIM
57520	2q32.3	2	197105269	197105269	T	A	T>A	HECW2	exonic	nonsynonymous SNV	DDD4K.03996	DDD_2017	28135719	4293	0	exome	Developmental Delay (DD)	psychiatric disorder	validated	.	non-ssc	.	HECW2:NM_001304840:exon19:c.A2600T:p.D867V,HECW2:NM_001348768:exon21:c.A3668T:p.D1223V,HECW2:NM_020760:exon21:c.A3668T:p.D1223V	.	.	.	.	.	.	.	.	.	.	.	.	.	.	.	.	.	.	.	.	.	.	.	.	.	.
57520	2q32.3	2	197187292	197187292	T	C	T>C	HECW2	exonic	nonsynonymous SNV	DDD4K.00677	DDD_2017	28135719	4293	0	exome	Developmental Delay (DD)	psychiatric disorder	validated	.	non-ssc	.	HECW2:NM_001348768:exon7:c.A794G:p.D265G,HECW2:NM_020760:exon7:c.A794G:p.D265G	.	.	.	.	.	.	.	.	.	.	.	.	.	.	.	.	.	.	.	.	.	.	.	.	.	.
23451	2q33.1	2	198267698	198267698	C	T	C>T	SF3B1	exonic	nonsynonymous SNV	DDD4K.01443	DDD_2017	28135719	4293	0	exome	Developmental Delay (DD)	psychiatric disorder	validated	.	non-ssc	.	SF3B1:NM_012433:exon13:c.G1781A:p.R594Q	.	.	.	.	.	.	.	.	.	.	.	.	.	.	.	.	.	.	.	.	COSM3407453	1(central_nervous_system)	.	.	.	.
23451	2q33.1	2	198273102	198273102	G	A	G>A	SF3B1	exonic	nonsynonymous SNV	DDD4K.01921	DDD_2017	28135719	4293	0	exome	Developmental Delay (DD)	psychiatric disorder	validated	.	non-ssc	.	SF3B1:NM_012433:exon8:c.C1108T:p.P370S	.	.	.	.	.	.	.	.	.	.	.	.	.	.	.	.	.	.	.	.	.	.	.	.	.	.
23314	2q33.1	2	200173680	200173680	C	T	C>T	SATB2	exonic	nonsynonymous SNV	DDD4K.00078	DDD_2017	28135719	4293	0	exome	Developmental Delay (DD)	psychiatric disorder	validated	.	non-ssc	.	SATB2:NM_001172509:exon10:c.G1543A:p.G515S,SATB2:NM_001172517:exon11:c.G1543A:p.G515S,SATB2:NM_015265:exon11:c.G1543A:p.G515S	.	.	.	.	.	.	.	.	.	.	.	.	.	.	.	.	.	.	.	.	.	.	.	.	.	.
23314	2q33.1	2	200193603	200193603	C	T	C>T	SATB2	exonic	nonsynonymous SNV	DDD4K.02069	DDD_2017	28135719	4293	0	exome	Developmental Delay (DD)	psychiatric disorder	validated	.	non-ssc	.	SATB2:NM_001172509:exon8:c.G1204A:p.E402K,SATB2:NM_001172517:exon9:c.G1204A:p.E402K,SATB2:NM_015265:exon9:c.G1204A:p.E402K	.	.	.	.	.	.	.	.	.	.	.	.	.	.	.	.	.	.	.	.	.	.	.	.	.	.
23314	2q33.1	2	200193611	200193611	C	T	C>T	SATB2	exonic	nonsynonymous SNV	DDD4K.03545	DDD_2017	28135719	4293	0	exome	Developmental Delay (DD)	psychiatric disorder	validated	.	non-ssc	.	SATB2:NM_001172509:exon8:c.G1196A:p.R399H,SATB2:NM_001172517:exon9:c.G1196A:p.R399H,SATB2:NM_015265:exon9:c.G1196A:p.R399H	.	.	.	.	.	.	.	.	.	.	.	.	.	.	.	.	.	.	.	.	COSM1014611	1(soft_tissue);1(endometrium)	Pathogenic	not_provided	RCV000413401.1	MedGen
23314	2q33.1	2	200213431	200213431	C	A	C>A	SATB2	exonic	nonsynonymous SNV	DDD4K.03852	DDD_2017	28135719	4293	0	exome	Developmental Delay (DD)	psychiatric disorder	validated	.	non-ssc	.	SATB2:NM_001172509:exon7:c.G1166T:p.R389L,SATB2:NM_001172517:exon8:c.G1166T:p.R389L,SATB2:NM_015265:exon8:c.G1166T:p.R389L	.	.	.	.	.	.	.	.	.	.	.	.	.	.	.	.	.	.	.	.	.	.	.	.	.	.
22868	2q33.3	2	207632159	207632159	A	G	A>G	FASTKD2	exonic	nonsynonymous SNV	DDD4K.00382	DDD_2017	28135719	4293	0	exome	Developmental Delay (DD)	psychiatric disorder	validated	.	non-ssc	.	FASTKD2:NM_001136193:exon2:c.A742G:p.T248A,FASTKD2:NM_001136194:exon2:c.A742G:p.T248A,FASTKD2:NM_014929:exon2:c.A742G:p.T248A	.	.	.	.	.	.	.	.	.	.	.	.	.	.	.	.	.	.	.	.	.	.	.	.	.	.
1385	2q33.3	2	208425064	208425064	G	C	G>C	CREB1	exonic	nonsynonymous SNV	DDD4K.02652	DDD_2017	28135719	4293	0	exome	Developmental Delay (DD)	psychiatric disorder	validated	.	non-ssc	.	CREB1:NM_001320793:exon3:c.G229C:p.V77L,CREB1:NM_004379:exon3:c.G229C:p.V77L,CREB1:NM_134442:exon3:c.G229C:p.V77L	.	.	.	.	.	.	.	.	.	.	.	.	.	.	.	.	.	.	.	.	.	.	.	.	.	.
285175	2q34	2	210787021	210787021	C	T	C>T	UNC80	exonic	nonsynonymous SNV	DDD4K.00391	DDD_2017	28135719	4293	0	exome	Developmental Delay (DD)	psychiatric disorder	validated	.	non-ssc	.	UNC80:NM_032504:exon34:c.C5378T:p.P1793L,UNC80:NM_182587:exon34:c.C5363T:p.P1788L	.	.	.	.	.	.	.	.	.	.	.	.	.	.	.	.	.	.	.	.	.	.	.	.	.	.
55825	2q35	2	216923628	216923628	G	A	G>A	PECR	exonic	nonsynonymous SNV	DDD4K.02689	DDD_2017	28135719	4293	0	exome	Developmental Delay (DD)	psychiatric disorder	validated	.	non-ssc	.	PECR:NM_018441:exon4:c.C496T:p.P166S	.	.	.	.	.	.	.	.	.	.	.	.	.	.	.	.	.	.	.	.	.	.	.	.	.	.
5077	2q36.1	2	223086091	223086091	G	A	G>A	PAX3	exonic	nonsynonymous SNV	DDD4K.01266	DDD_2017	28135719	4293	0	exome	Developmental Delay (DD)	psychiatric disorder	validated	.	non-ssc	.	PAX3:NM_001127366:exon6:c.C805T:p.R269C,PAX3:NM_181457:exon6:c.C808T:p.R270C,PAX3:NM_181458:exon6:c.C808T:p.R270C,PAX3:NM_181459:exon6:c.C808T:p.R270C,PAX3:NM_181460:exon6:c.C808T:p.R270C,PAX3:NM_181461:exon6:c.C808T:p.R270C	.	.	.	.	.	.	.	.	.	.	.	.	.	.	.	.	.	.	0.0082	.	COSM1669796	1(prostate)	.	.	.	.
8452	2q36.2	2	225422455	225422455	T	A	T>A	CUL3	exonic	nonsynonymous SNV	DDD4K.02299	DDD_2017	28135719	4293	0	exome	Developmental Delay (DD)	psychiatric disorder	validated	.	non-ssc	.	CUL3:NM_001257198:exon2:c.A203T:p.Y68F,CUL3:NM_003590:exon2:c.A185T:p.Y62F	.	.	.	.	.	.	.	.	.	.	.	.	.	.	.	.	.	.	.	.	.	.	.	.	.	.
9320	2q36.3	2	230632353	230632353	G	T	G>T	TRIP12	exonic	nonsynonymous SNV	DDD4K.01922	DDD_2017	28135719	4293	0	exome	Developmental Delay (DD)	psychiatric disorder	validated	.	non-ssc	.	TRIP12:NM_001284216:exon39:c.C5086A:p.P1696T,TRIP12:NM_001284215:exon41:c.C5995A:p.P1999T,TRIP12:NM_001348316:exon41:c.C5995A:p.P1999T,TRIP12:NM_001348317:exon41:c.C5980A:p.P1994T,TRIP12:NM_001348318:exon41:c.C5980A:p.P1994T,TRIP12:NM_001348331:exon41:c.C5899A:p.P1967T,TRIP12:NM_004238:exon41:c.C5896A:p.P1966T,TRIP12:NM_001284214:exon42:c.C6040A:p.P2014T,TRIP12:NM_001348315:exon42:c.C6040A:p.P201…	.	.	.	.	.	.	.	.	.	.	.	.	.	.	.	.	.	.	.	.	.	.	.	.	.	.
9320	2q36.3	2	230633358	230633358	G	C	G>C	TRIP12	exonic	nonsynonymous SNV	DDD4K.02564	DDD_2017	28135719	4293	0	exome	Developmental Delay (DD)	psychiatric disorder	validated	.	non-ssc	.	TRIP12:NM_001284216:exon38:c.C4946G:p.T1649S,TRIP12:NM_001284215:exon40:c.C5855G:p.T1952S,TRIP12:NM_001348316:exon40:c.C5855G:p.T1952S,TRIP12:NM_001348317:exon40:c.C5840G:p.T1947S,TRIP12:NM_001348318:exon40:c.C5840G:p.T1947S,TRIP12:NM_001348331:exon40:c.C5759G:p.T1920S,TRIP12:NM_004238:exon40:c.C5756G:p.T1919S,TRIP12:NM_001284214:exon41:c.C5900G:p.T1967S,TRIP12:NM_001348315:exon41:c.C5900G:p.T196…	.	.	.	.	.	.	.	.	.	.	.	.	.	.	.	.	.	.	.	.	.	.	.	.	.	.
129563	2q37.1	2	233103338	233103338	G	A	G>A	DIS3L2	exonic	nonsynonymous SNV	DDD4K.01484	DDD_2017	28135719	4293	0	exome	Developmental Delay (DD)	psychiatric disorder	validated	.	non-ssc	.	DIS3L2:NM_001257281:exon11:c.G1300A:p.V434I,DIS3L2:NM_152383:exon11:c.G1300A:p.V434I	.	.	.	.	.	.	0.0002	0	8.83e-05	0.0001	0	7.61e-05	0	0.0007	.	.	.	.	.	rs758366698	.	.	Uncertain significance	Renal_hamartomas_nephroblastomatosis_and_fetal_gigantism	RCV000476298.1	MedGen:OMIM:Orphanet
9427	2q37.1	2	233347144	233347144	C	T	C>T	ECEL1	exonic	nonsynonymous SNV	DDD4K.03295	DDD_2017	28135719	4293	0	exome	Developmental Delay (DD)	psychiatric disorder	validated	.	non-ssc	.	ECEL1:NM_001290787:exon12:c.G1774A:p.D592N,ECEL1:NM_004826:exon12:c.G1780A:p.D594N	.	.	.	.	.	.	8.25e-06	0	0	0	0	0	0	6.06e-05	.	.	.	.	.	rs747968148	COSM5902551	1(skin)	.	.	.	.
728294	2q37.3	2	242690777	242690777	A	G	A>G	D2HGDH	exonic	nonsynonymous SNV	DDD4K.02518	DDD_2017	28135719	4293	0	exome	Developmental Delay (DD)	psychiatric disorder	validated	.	non-ssc	.	D2HGDH:NM_001287249:exon7:c.A712G:p.M238V,D2HGDH:NM_152783:exon8:c.A1114G:p.M372V	.	.	.	.	.	.	8.39e-06	0	0	0	0	1.53e-05	0	0	.	.	.	.	.	rs778078622	.	.	.	.	.	.
128637	20p13	20	425721	425721	G	A	G>A	TBC1D20	exonic	nonsynonymous SNV	DDD4K.00707	DDD_2017	28135719	4293	0	exome	Developmental Delay (DD)	psychiatric disorder	validated	.	non-ssc	.	TBC1D20:NM_144628:exon3:c.C310T:p.R104W	.	.	.	.	.	.	4.29e-05	0	0	0	0	5.68e-05	0	8.49e-05	.	.	.	.	.	rs758233100	.	.	.	.	.	.
1457	20p13	20	468110	468110	G	A	G>A	CSNK2A1	exonic	nonsynonymous SNV	DDD4K.02018	DDD_2017	28135719	4293	0	exome	Developmental Delay (DD)	psychiatric disorder	validated	.	non-ssc	.	CSNK2A1:NM_177560:exon10:c.C526T:p.R176W,CSNK2A1:NM_001895:exon11:c.C934T:p.R312W,CSNK2A1:NM_177559:exon12:c.C934T:p.R312W	.	.	.	.	.	.	.	.	.	.	.	.	.	.	.	.	.	.	.	.	.	.	.	.	.	.
1457	20p13	20	472926	472926	T	C	T>C	CSNK2A1	exonic	nonsynonymous SNV	DDD4K.01531	DDD_2017	28135719	4293	0	exome	Developmental Delay (DD)	psychiatric disorder	validated	.	non-ssc	.	CSNK2A1:NM_177560:exon7:c.A185G:p.K62R,CSNK2A1:NM_001895:exon8:c.A593G:p.K198R,CSNK2A1:NM_177559:exon9:c.A593G:p.K198R	.	.	.	.	.	.	.	.	.	.	.	.	.	.	.	.	.	.	.	rs869312840	.	.	Pathogenic|Pathogenic	not_provided|Okur-chung_neurodevelopmental_syndrome	RCV000210367.2|RCV000239482.1	MedGen|MedGen:OMIM
1457	20p13	20	472926	472926	T	C	T>C	CSNK2A1	exonic	nonsynonymous SNV	DDD4K.02604	DDD_2017	28135719	4293	0	exome	Developmental Delay (DD)	psychiatric disorder	validated	.	non-ssc	.	CSNK2A1:NM_177560:exon7:c.A185G:p.K62R,CSNK2A1:NM_001895:exon8:c.A593G:p.K198R,CSNK2A1:NM_177559:exon9:c.A593G:p.K198R	.	.	.	.	.	.	.	.	.	.	.	.	.	.	.	.	.	.	.	rs869312840	.	.	Pathogenic|Pathogenic	not_provided|Okur-chung_neurodevelopmental_syndrome	RCV000210367.2|RCV000239482.1	MedGen|MedGen:OMIM
1457	20p13	20	472930	472930	A	T	A>T	CSNK2A1	exonic	nonsynonymous SNV	DDD4K.02493	DDD_2017	28135719	4293	0	exome	Developmental Delay (DD)	psychiatric disorder	validated	.	non-ssc	.	CSNK2A1:NM_177560:exon7:c.T181A:p.F61I,CSNK2A1:NM_001895:exon8:c.T589A:p.F197I,CSNK2A1:NM_177559:exon9:c.T589A:p.F197I	.	.	.	.	.	.	.	.	.	.	.	.	.	.	.	.	.	.	.	.	.	.	.	.	.	.
1457	20p13	20	472947	472947	C	T	C>T	CSNK2A1	exonic	nonsynonymous SNV	DDD4K.00993	DDD_2017	28135719	4293	0	exome	Developmental Delay (DD)	psychiatric disorder	validated	.	non-ssc	.	CSNK2A1:NM_177560:exon7:c.G164A:p.R55Q,CSNK2A1:NM_001895:exon8:c.G572A:p.R191Q,CSNK2A1:NM_177559:exon9:c.G572A:p.R191Q	.	.	.	.	.	.	.	.	.	.	.	.	.	.	.	.	.	.	.	.	COSM724307	1(lung)	.	.	.	.
1457	20p13	20	472997	472997	T	C	T>C	CSNK2A1	exonic	nonsynonymous SNV	DDD4K.02753	DDD_2017	28135719	4293	0	exome	Developmental Delay (DD)	psychiatric disorder	validated	.	non-ssc	.	CSNK2A1:NM_177560:exon7:c.A114G:p.I38M,CSNK2A1:NM_001895:exon8:c.A522G:p.I174M,CSNK2A1:NM_177559:exon9:c.A522G:p.I174M	.	.	.	.	.	.	.	.	.	.	.	.	.	.	.	.	.	.	.	.	.	.	.	.	.	.
1457	20p13	20	480553	480553	C	T	C>T	CSNK2A1	exonic	nonsynonymous SNV	DDD4K.02377	DDD_2017	28135719	4293	0	exome	Developmental Delay (DD)	psychiatric disorder	validated	.	non-ssc	.	CSNK2A1:NM_001895:exon4:c.G239A:p.R80H,CSNK2A1:NM_177559:exon5:c.G239A:p.R80H	.	.	.	.	.	.	.	.	.	.	.	.	.	.	.	.	.	.	.	.	COSM215816	2(haematopoietic_and_lymphoid_tissue);1(central_nervous_system)	Likely pathogenic	not_provided	RCV000413359.1	MedGen
10326	20p13	20	1559029	1559029	C	G	C>G	SIRPB1	exonic	nonsynonymous SNV	DDD4K.01253	DDD_2017	28135719	4293	0	exome	Developmental Delay (DD)	psychiatric disorder	validated	.	non-ssc	.	SIRPB1:NM_001083910:exon2:c.G388C:p.D130H,SIRPB1:NM_001330639:exon2:c.G385C:p.D129H,SIRPB1:NM_006065:exon2:c.G388C:p.D130H	.	.	.	.	.	.	2.51e-05	9.67e-05	0	0	0	3.06e-05	0	0	.	.	.	.	.	rs572529769	.	.	.	.	.	.
343641	20p13	20	2378652	2378652	G	A	G>A	TGM6	exonic	nonsynonymous SNV	DDD4K.01196	DDD_2017	28135719	4293	0	exome	Developmental Delay (DD)	psychiatric disorder	validated	.	non-ssc	.	TGM6:NM_001254734:exon5:c.G632A:p.R211H,TGM6:NM_198994:exon5:c.G632A:p.R211H	0.0002	.	.	0.001	.	.	0.0001	9.61e-05	8.64e-05	0.0005	0	5.99e-05	0.0011	0.0001	.	.	.	.	.	rs192045738	COSM3732330	1(stomach);1(large_intestine)	.	.	.	.
631	20p12.1	20	17479598	17479598	G	A	G>A	BFSP1	exonic	nonsynonymous SNV	DDD4K.00499	DDD_2017	28135719	4293	0	exome	Developmental Delay (DD)	psychiatric disorder	validated	.	non-ssc	.	BFSP1:NM_001161705:exon6:c.C448T:p.R150C,BFSP1:NM_001195:exon6:c.C823T:p.R275C,BFSP1:NM_001278607:exon6:c.C490T:p.R164C,BFSP1:NM_001278606:exon7:c.C406T:p.R136C,BFSP1:NM_001278608:exon8:c.C406T:p.R136C	.	.	.	.	.	.	8.24e-06	9.61e-05	0	0	0	0	0	0	0.0002	0.0005	.	.	.	rs34687819	.	.	.	.	.	.
7692	20p11.23	20	18297077	18297077	G	A	G>A	ZNF133	exonic	nonsynonymous SNV	DDD4K.01172	DDD_2017	28135719	4293	0	exome	Developmental Delay (DD)	psychiatric disorder	validated	.	non-ssc	.	ZNF133:NM_001283005:exon2:c.G1525A:p.G509R,ZNF133:NM_001283006:exon3:c.G1603A:p.G535R,ZNF133:NM_001283007:exon3:c.G1621A:p.G541R,ZNF133:NM_001083330:exon4:c.G1579A:p.G527R,ZNF133:NM_001282998:exon4:c.G1582A:p.G528R,ZNF133:NM_001282999:exon4:c.G1582A:p.G528R,ZNF133:NM_001283008:exon4:c.G1297A:p.G433R,ZNF133:NM_001282997:exon5:c.G1582A:p.G528R,ZNF133:NM_001283000:exon5:c.G1582A:p.G528R,ZNF133:NM_00…	.	.	.	.	.	.	8.25e-06	0	0	0	0	1.5e-05	0	0	.	.	.	.	.	rs757562188	.	.	.	.	.	.
57419	20p11.23	20	19665864	19665864	G	A	G>A	SLC24A3	exonic	nonsynonymous SNV	DDD4K.03618	DDD_2017	28135719	4293	0	exome	Developmental Delay (DD)	psychiatric disorder	validated	.	non-ssc	.	SLC24A3:NM_020689:exon12:c.G1183A:p.V395M	.	.	.	.	.	.	0.0004	9.61e-05	0	0	0.002	0.0005	0.0011	0.0002	.	.	.	.	.	rs199569984	COSM4636384	2(soft_tissue);1(large_intestine)	.	.	.	.
26074	20p11.23	20	20269293	20269293	C	T	C>T	CFAP61	exonic	nonsynonymous SNV	DDD4K.01578	DDD_2017	28135719	4293	0	exome	Developmental Delay (DD)	psychiatric disorder	validated	.	non-ssc	.	CFAP61:NM_015585:exon23:c.C2837T:p.T946M	0.0002	.	.	.	.	0.001	0.0001	0.0002	0	0	0	7.5e-05	0	0.0005	0.0001	0.0002	.	.	.	rs140045830	COSM723450	2(lung)	.	.	.	.
388795	20q11.21	20	31505202	31505202	T	C	T>C	EFCAB8	exonic	nonsynonymous SNV	DDD4K.02327	DDD_2017	28135719	4293	0	exome	Developmental Delay (DD)	psychiatric disorder	validated	.	non-ssc	.	EFCAB8:NM_001143967:exon18:c.T1952C:p.L651P	.	.	.	.	.	.	.	.	.	.	.	.	.	.	.	.	.	.	.	.	.	.	.	.	.	.
84905	20q11.22	20	32377326	32377326	C	T	C>T	ZNF341	exonic	nonsynonymous SNV	DDD4K.03221	DDD_2017	28135719	4293	0	exome	Developmental Delay (DD)	psychiatric disorder	validated	.	non-ssc	.	ZNF341:NM_001282935:exon13:c.C1697T:p.T566M,ZNF341:NM_001282933:exon14:c.C1967T:p.T656M,ZNF341:NM_032819:exon14:c.C1946T:p.T649M	.	.	.	.	.	.	4.13e-05	0	0	0	0	0	0	0.0003	.	.	.	.	.	rs763451931	.	.	.	.	.	.
10137	20q11.22	20	34240646	34240646	C	T	C>T	RBM12	exonic	nonsynonymous SNV	DDD4K.01429	DDD_2017	28135719	4293	0	exome	Developmental Delay (DD)	psychiatric disorder	validated	.	non-ssc	.	RBM12:NM_001198840:exon2:c.G2599A:p.V867M,RBM12:NM_001198838:exon3:c.G2599A:p.V867M,RBM12:NM_006047:exon3:c.G2599A:p.V867M,RBM12:NM_152838:exon3:c.G2599A:p.V867M	.	.	.	.	.	.	.	.	.	.	.	.	.	.	.	.	.	.	.	.	.	.	.	.	.	.
343578	20q11.23	20	37277327	37277327	T	C	T>C	ARHGAP40	exonic	nonsynonymous SNV	DDD4K.02611	DDD_2017	28135719	4293	0	exome	Developmental Delay (DD)	psychiatric disorder	validated	.	non-ssc	.	ARHGAP40:NM_001164431:exon14:c.T1919C:p.V640A	.	.	.	.	.	.	.	.	.	.	.	.	.	.	.	.	.	.	.	.	.	.	.	.	.	.
11122	20q12	20	40790168	40790168	C	T	C>T	PTPRT	exonic	nonsynonymous SNV	DDD4K.02811	DDD_2017	28135719	4293	0	exome	Developmental Delay (DD)	psychiatric disorder	validated	.	non-ssc	.	PTPRT:NM_007050:exon17:c.G2506A:p.G836R,PTPRT:NM_133170:exon18:c.G2563A:p.G855R	.	.	.	.	.	.	5.18e-05	0.0001	0	0	0	7.63e-05	0	0	.	.	.	.	.	rs745346735	.	.	.	.	.	.
10110	20q13.12	20	42194978	42194978	G	C	G>C	SGK2	exonic	nonsynonymous SNV	DDD4K.00301	DDD_2017	28135719	4293	0	exome	Developmental Delay (DD)	psychiatric disorder	validated	.	non-ssc	.	SGK2:NM_016276:exon1:c.G23C:p.G8A	.	.	.	.	.	.	.	.	.	.	.	.	.	.	.	.	.	.	.	.	.	.	.	.	.	.
4318	20q13.12	20	44640792	44640792	G	A	G>A	MMP9	exonic	nonsynonymous SNV	DDD4K.01018	DDD_2017	28135719	4293	0	exome	Developmental Delay (DD)	psychiatric disorder	validated	.	non-ssc	.	MMP9:NM_004994:exon7:c.G1014A:p.M338I	.	.	.	.	.	.	.	.	.	.	.	.	.	.	.	.	.	.	.	.	.	.	.	.	.	.
958	20q13.12	20	44747032	44747032	C	T	C>T	CD40	exonic	nonsynonymous SNV	DDD4K.00025	DDD_2017	28135719	4293	0	exome	Developmental Delay (DD)	psychiatric disorder	validated	.	non-ssc	.	CD40:NM_001250:exon1:c.C50T:p.A17V,CD40:NM_001302753:exon1:c.C50T:p.A17V,CD40:NM_001322421:exon1:c.C50T:p.A17V,CD40:NM_001322422:exon1:c.C50T:p.A17V,CD40:NM_152854:exon1:c.C50T:p.A17V	.	.	.	.	.	.	.	.	.	.	.	.	.	.	.	.	.	.	.	.	.	.	.	.	.	.
57169	20q13.13	20	47863845	47863845	T	C	T>C	ZNFX1	exonic	nonsynonymous SNV	DDD4K.03438	DDD_2017	28135719	4293	0	exome	Developmental Delay (DD)	psychiatric disorder	validated	.	non-ssc	.	ZNFX1:NM_021035:exon14:c.A5716G:p.N1906D	.	.	.	.	.	.	.	.	.	.	.	.	.	.	.	.	.	.	.	.	.	.	.	.	.	.
3745	20q13.13	20	47990924	47990924	T	G	T>G	KCNB1	exonic	nonsynonymous SNV	DDD4K.00872	DDD_2017	28135719	4293	0	exome	Developmental Delay (DD)	psychiatric disorder	validated	.	non-ssc	.	KCNB1:NM_004975:exon2:c.A1173C:p.K391N	.	.	.	.	.	.	.	.	.	.	.	.	.	.	.	.	.	.	.	.	.	.	.	.	.	.
7764	20q13.2	20	52198293	52198293	G	A	G>A	ZNF217	exonic	nonsynonymous SNV	DDD4K.01863	DDD_2017	28135719	4293	0	exome	Developmental Delay (DD)	psychiatric disorder	validated	.	non-ssc	.	ZNF217:NM_006526:exon1:c.C1073T:p.A358V	.	.	.	.	.	.	3.3e-05	0	0	0	0	5.99e-05	0	0	.	.	.	.	.	rs772254816	.	.	.	.	.	.
1137	20q13.33	20	61981922	61981922	C	T	C>T	CHRNA4	exonic	nonsynonymous SNV	DDD4K.00391	DDD_2017	28135719	4293	0	exome	Developmental Delay (DD)	psychiatric disorder	validated	.	non-ssc	.	CHRNA4:NM_000744:exon5:c.G841A:p.V281M,CHRNA4:NM_001256573:exon5:c.G313A:p.V105M	.	.	.	.	.	.	2.49e-05	0	8.65e-05	0	0	3.02e-05	0	0	.	.	.	.	.	rs764238999	.	.	.	.	.	.
3785	20q13.33	20	62069997	62069997	G	A	G>A	KCNQ2	exonic	nonsynonymous SNV	DDD4K.02327	DDD_2017	28135719	4293	0	exome	Developmental Delay (DD)	psychiatric disorder	validated	.	non-ssc	.	KCNQ2:NM_004518:exon7:c.C1004T:p.P335L,KCNQ2:NM_172106:exon7:c.C1004T:p.P335L,KCNQ2:NM_172107:exon7:c.C1004T:p.P335L,KCNQ2:NM_172108:exon7:c.C1004T:p.P335L,KCNQ2:NM_172109:exon7:c.C1004T:p.P335L	.	.	.	.	.	.	.	.	.	.	.	.	.	.	.	.	.	.	.	rs796052641	.	.	Pathogenic	not_provided	RCV000187889.1	MedGen
3785	20q13.33	20	62070004	62070004	G	A	G>A	KCNQ2	exonic	nonsynonymous SNV	DDD4K.00538	DDD_2017	28135719	4293	0	exome	Developmental Delay (DD)	psychiatric disorder	validated	.	non-ssc	.	KCNQ2:NM_004518:exon7:c.C997T:p.R333W,KCNQ2:NM_172106:exon7:c.C997T:p.R333W,KCNQ2:NM_172107:exon7:c.C997T:p.R333W,KCNQ2:NM_172108:exon7:c.C997T:p.R333W,KCNQ2:NM_172109:exon7:c.C997T:p.R333W	.	.	.	.	.	.	.	.	.	.	.	.	.	.	.	.	.	.	.	rs118192215	COSM4100376;COSM4100375;COSM4100378;COSM4100377	1(stomach)	Pathogenic|Pathogenic	Early_infantile_epileptic_encephalopathy_7|not_provided	RCV000021019.2|RCV000187879.2	MedGen:OMIM:Orphanet|MedGen
3785	20q13.33	20	62071032	62071032	G	C	G>C	KCNQ2	exonic	nonsynonymous SNV	DDD4K.03331	DDD_2017	28135719	4293	0	exome	Developmental Delay (DD)	psychiatric disorder	validated	.	non-ssc	.	KCNQ2:NM_004518:exon6:c.C846G:p.D282E,KCNQ2:NM_172106:exon6:c.C846G:p.D282E,KCNQ2:NM_172107:exon6:c.C846G:p.D282E,KCNQ2:NM_172108:exon6:c.C846G:p.D282E,KCNQ2:NM_172109:exon6:c.C846G:p.D282E	.	.	.	.	.	.	.	.	.	.	.	.	.	.	.	.	.	.	.	.	.	.	.	.	.	.
3785	20q13.33	20	62071037	62071037	C	T	C>T	KCNQ2	exonic	nonsynonymous SNV	DDD4K.00328	DDD_2017	28135719	4293	0	exome	Developmental Delay (DD)	psychiatric disorder	validated	.	non-ssc	.	KCNQ2:NM_004518:exon6:c.G841A:p.G281R,KCNQ2:NM_172106:exon6:c.G841A:p.G281R,KCNQ2:NM_172107:exon6:c.G841A:p.G281R,KCNQ2:NM_172108:exon6:c.G841A:p.G281R,KCNQ2:NM_172109:exon6:c.G841A:p.G281R	.	.	.	.	.	.	.	.	.	.	.	.	.	.	.	.	.	.	.	rs794727813	.	.	Pathogenic\x2cPathogenic|Uncertain significance|Pathogenic	Early_infantile_epileptic_encephalopathy_7\x2cnot_provided|not_specified|Early_infantile_epileptic_encephalopathy_7	RCV000196180.2\x2cRCV000179560.4|RCV000259127.1|RCV000408728.1	MedGen:OMIM:Orphanet\x2cMedGen|MedGen|MedGen:OMIM:Orphanet
3785	20q13.33	20	62073782	62073782	C	T	C>T	KCNQ2	exonic	nonsynonymous SNV	DDD4K.03013	DDD_2017	28135719	4293	0	exome	Developmental Delay (DD)	psychiatric disorder	validated	.	non-ssc	.	KCNQ2:NM_004518:exon5:c.G793A:p.A265T,KCNQ2:NM_172106:exon5:c.G793A:p.A265T,KCNQ2:NM_172107:exon5:c.G793A:p.A265T,KCNQ2:NM_172108:exon5:c.G793A:p.A265T,KCNQ2:NM_172109:exon5:c.G793A:p.A265T	.	.	.	.	.	.	.	.	.	.	.	.	.	.	.	.	.	.	.	rs794727740	.	.	Pathogenic\x2cLikely pathogenic|other|Pathogenic|Likely pathogenic	Early_infantile_epileptic_encephalopathy_7\x2cBenign_familial_neonatal_seizures_1|Early_infantile_epileptic_encephalopathy_7|not_provided|Seizures	RCV000408725.1\x2cRCV000179031.1|RCV000179032.3|RCV000187875.1|RCV000192955.1	MedGen:OMIM:Orphanet\x2cMedGen:OMIM|MedGen:OMIM:Orphanet|MedGen|Human_Phenotype_Ontology:MedGen
1917	20q13.33	20	62124508	62124508	C	G	C>G	EEF1A2	exonic	nonsynonymous SNV	DDD4K.00592	DDD_2017	28135719	4293	0	exome	Developmental Delay (DD)	psychiatric disorder	validated	.	non-ssc	.	EEF1A2:NM_001958:exon5:c.G754C:p.D252H	.	.	.	.	.	.	.	.	.	.	.	.	.	.	.	.	.	.	.	rs786205865	.	.	Pathogenic	Mental_retardation\x2c_autosomal_dominant_38	RCV000172839.2	MedGen:OMIM
1917	20q13.33	20	62127262	62127262	C	T	C>T	EEF1A2	exonic	nonsynonymous SNV	DDD4K.03115	DDD_2017	28135719	4293	0	exome	Developmental Delay (DD)	psychiatric disorder	validated	.	non-ssc	.	EEF1A2:NM_001958:exon3:c.G271A:p.D91N	.	.	.	.	.	.	.	.	.	.	.	.	.	.	.	.	.	.	.	.	COSM1029101	1(endometrium)	Pathogenic	not_provided	RCV000285537.1	MedGen
8204	21q11.2	21	16338753	16338753	C	G	C>G	NRIP1	exonic	nonsynonymous SNV	DDD4K.00059	DDD_2017	28135719	4293	0	exome	Developmental Delay (DD)	psychiatric disorder	validated	.	non-ssc	.	NRIP1:NM_003489:exon4:c.G1761C:p.Q587H	.	.	.	.	.	.	.	.	.	.	.	.	.	.	.	.	.	.	.	.	.	.	.	.	.	.
5651	21q21.1	21	19732146	19732146	C	T	C>T	TMPRSS15	exonic	nonsynonymous SNV	DDD4K.01278	DDD_2017	28135719	4293	0	exome	Developmental Delay (DD)	psychiatric disorder	validated	.	non-ssc	.	TMPRSS15:NM_002772:exon8:c.G808A:p.D270N	.	.	.	.	.	.	4.3e-05	0.0001	8.88e-05	0	0	4.73e-05	0	0	.	.	.	.	.	rs747916640	COSM1713865	1(skin)	.	.	.	.
57466	21q22.11	21	33044498	33044498	C	T	C>T	SCAF4	exonic	nonsynonymous SNV	DDD4K.04175	DDD_2017	28135719	4293	0	exome	Developmental Delay (DD)	psychiatric disorder	validated	.	non-ssc	.	SCAF4:NM_001145444:exon19:c.G2613A:p.M871I,SCAF4:NM_001145445:exon20:c.G2592A:p.M864I,SCAF4:NM_020706:exon20:c.G2658A:p.M886I	.	.	.	.	.	.	.	.	.	.	.	.	.	.	.	.	.	.	.	.	.	.	.	.	.	.
8867	21q22.11	21	34038828	34038828	T	C	T>C	SYNJ1	exonic	nonsynonymous SNV	DDD4K.03174	DDD_2017	28135719	4293	0	exome	Developmental Delay (DD)	psychiatric disorder	validated	.	non-ssc	.	SYNJ1:NM_001160306:exon15:c.A1852G:p.N618D,SYNJ1:NM_001160302:exon16:c.A1867G:p.N623D,SYNJ1:NM_003895:exon16:c.A1984G:p.N662D,SYNJ1:NM_203446:exon16:c.A1984G:p.N662D	.	.	.	.	.	.	1.65e-05	0	0	0	0	3e-05	0	0	0.0001	.	0.0001	.	.	rs377719553	.	.	.	.	.	.
6651	21q22.11	21	34927094	34927094	A	G	A>G	SON	exonic	nonsynonymous SNV	DDD4K.00608	DDD_2017	28135719	4293	0	exome	Developmental Delay (DD)	psychiatric disorder	validated	.	non-ssc	.	SON:NM_001291411:exon3:c.A5557G:p.K1853E,SON:NM_032195:exon3:c.A5557G:p.K1853E,SON:NM_138927:exon3:c.A5557G:p.K1853E	.	.	.	.	.	.	.	.	.	.	.	.	.	.	.	.	.	.	.	.	.	.	.	.	.	.
54093	21q22.12	21	37412928	37412928	G	A	G>A	SETD4	exonic	nonsynonymous SNV	DDD4K.03467	DDD_2017	28135719	4293	0	exome	Developmental Delay (DD)	psychiatric disorder	validated	.	non-ssc	.	SETD4:NM_017438:exon9:c.C1009T:p.P337S,SETD4:NM_001286752:exon10:c.C937T:p.P313S	.	.	.	.	.	.	4.14e-05	0	0	0	0	7.53e-05	0	0	.	.	.	.	.	rs757438556	.	.	.	.	.	.
54014	21q22.2	21	40569125	40569125	C	T	C>T	BRWD1	exonic	nonsynonymous SNV	DDD4K.00361	DDD_2017	28135719	4293	0	exome	Developmental Delay (DD)	psychiatric disorder	validated	.	non-ssc	.	BRWD1:NM_018963:exon41:c.G5870A:p.S1957N,BRWD1:NM_033656:exon41:c.G5870A:p.S1957N	.	.	.	.	.	.	.	.	.	.	.	.	.	.	.	.	.	.	.	.	.	.	.	.	.	.
1826	21q22.2	21	41455898	41455898	T	C	T>C	DSCAM	exonic	nonsynonymous SNV	DDD4K.03651	DDD_2017	28135719	4293	0	exome	Developmental Delay (DD)	psychiatric disorder	validated	.	non-ssc	.	DSCAM:NM_001271534:exon24:c.A4168G:p.T1390A,DSCAM:NM_001389:exon24:c.A4168G:p.T1390A	.	.	.	.	.	.	9.98e-05	0	0.0003	0	0	0.0001	0.0011	0	.	.	.	.	.	rs759205106	.	.	.	.	.	.
11077	21q22.3	21	45033741	45033741	A	G	A>G	HSF2BP	exonic	nonsynonymous SNV	DDD4K.02987	DDD_2017	28135719	4293	0	exome	Developmental Delay (DD)	psychiatric disorder	validated	.	non-ssc	.	HSF2BP:NM_007031:exon7:c.T662C:p.L221S	.	.	.	.	.	.	.	.	.	.	.	.	.	.	.	.	.	.	.	.	.	.	.	.	.	.
8218	22q11.21	22	19213748	19213748	A	T	A>T	CLTCL1	exonic	nonsynonymous SNV	DDD4K.03271	DDD_2017	28135719	4293	0	exome	Developmental Delay (DD)	psychiatric disorder	validated	.	non-ssc	.	CLTCL1:NM_001835:exon12:c.T1941A:p.N647K,CLTCL1:NM_007098:exon12:c.T1941A:p.N647K	.	.	.	.	.	.	.	.	.	.	.	.	.	.	.	.	.	.	.	.	.	.	.	.	.	.
51586	22q11.21	22	20940056	20940056	G	A	G>A	MED15	exonic	nonsynonymous SNV	DDD4K.01651	DDD_2017	28135719	4293	0	exome	Developmental Delay (DD)	psychiatric disorder	validated	.	non-ssc	.	MED15:NM_001293236:exon15:c.G1840A:p.V614M,MED15:NM_001293234:exon16:c.G2002A:p.V668M,MED15:NM_001293235:exon16:c.G1975A:p.V659M,MED15:NM_001293237:exon16:c.G1975A:p.V659M,MED15:NM_015889:exon16:c.G2053A:p.V685M,MED15:NM_001003891:exon17:c.G2173A:p.V725M	.	.	.	.	.	.	.	.	.	.	.	.	.	.	.	.	.	.	.	.	.	.	.	.	.	.
3053	22q11.21	22	21133974	21133974	G	A	G>A	SERPIND1	exonic	nonsynonymous SNV	DDD4K.04173	DDD_2017	28135719	4293	0	exome	Developmental Delay (DD)	psychiatric disorder	validated	.	non-ssc	.	SERPIND1:NM_000185:exon2:c.G374A:p.R125H	.	.	.	.	.	.	1.65e-05	0	0	0	0	0	0	0.0001	.	.	.	.	.	rs764489942	.	.	.	.	.	.
2781	22q11.22	22	23465544	23465544	A	G	A>G	GNAZ	exonic	nonsynonymous SNV	DDD4K.00555	DDD_2017	28135719	4293	0	exome	Developmental Delay (DD)	psychiatric disorder	validated	.	non-ssc	.	GNAZ:NM_002073:exon3:c.A994G:p.N332D	.	.	.	.	.	.	.	.	.	.	.	.	.	.	.	.	.	.	.	.	.	.	.	.	.	.
10634	22q12.2	22	29706498	29706498	T	C	T>C	GAS2L1	exonic	nonsynonymous SNV	DDD4K.01419	DDD_2017	28135719	4293	0	exome	Developmental Delay (DD)	psychiatric disorder	validated	.	non-ssc	.	GAS2L1:NM_001278730:exon3:c.T703C:p.Y235H	.	.	.	.	.	.	8.25e-06	0	0	0	0	1.5e-05	0	0	.	.	.	.	.	rs776619700	.	.	.	.	.	.
8508	22q12.2	22	29957172	29957172	C	A	C>A	NIPSNAP1	exonic	nonsynonymous SNV	DDD4K.02396	DDD_2017	28135719	4293	0	exome	Developmental Delay (DD)	psychiatric disorder	validated	.	non-ssc	.	NIPSNAP1:NM_001202502:exon7:c.G539T:p.W180L,NIPSNAP1:NM_003634:exon7:c.G599T:p.W200L	.	.	.	.	.	.	.	.	.	.	.	.	.	.	.	.	.	.	.	.	.	.	.	.	.	.
22880	22q12.2	22	31324122	31324122	G	A	G>A	MORC2	exonic	nonsynonymous SNV	DDD4K.02568	DDD_2017	28135719	4293	0	exome	Developmental Delay (DD)	psychiatric disorder	validated	.	non-ssc	.	MORC2:NM_001303256:exon25:c.C2914T:p.R972W,MORC2:NM_001303257:exon25:c.C2914T:p.R972W,MORC2:NM_014941:exon26:c.C2728T:p.R910W	.	.	.	.	.	.	.	.	.	.	.	.	.	.	.	.	.	.	.	.	.	.	.	.	.	.
22880	22q12.2	22	31330899	31330899	G	A	G>A	MORC2	exonic	nonsynonymous SNV	DDD4K.03925	DDD_2017	28135719	4293	0	exome	Developmental Delay (DD)	psychiatric disorder	validated	.	non-ssc	.	MORC2:NM_001303256:exon19:c.C2062T:p.P688S,MORC2:NM_001303257:exon19:c.C2062T:p.P688S,MORC2:NM_014941:exon20:c.C1876T:p.P626S	.	.	.	.	.	.	.	.	.	.	.	.	.	.	.	.	.	.	.	.	.	.	.	.	.	.
22880	22q12.2	22	31333918	31333918	T	C	T>C	MORC2	exonic	nonsynonymous SNV	DDD4K.00632	DDD_2017	28135719	4293	0	exome	Developmental Delay (DD)	psychiatric disorder	validated	.	non-ssc	.	MORC2:NM_001303256:exon14:c.A1253G:p.Y418C,MORC2:NM_001303257:exon14:c.A1253G:p.Y418C,MORC2:NM_014941:exon15:c.A1067G:p.Y356C	.	.	.	.	.	.	.	.	.	.	.	.	.	.	.	.	.	.	.	.	.	.	.	.	.	.
22880	22q12.2	22	31342360	31342360	G	A	G>A	MORC2	exonic	nonsynonymous SNV	DDD4K.03832	DDD_2017	28135719	4293	0	exome	Developmental Delay (DD)	psychiatric disorder	validated	.	non-ssc	.	MORC2:NM_001303256:exon6:c.C394T:p.R132C,MORC2:NM_001303257:exon6:c.C394T:p.R132C,MORC2:NM_014941:exon7:c.C208T:p.R70C	.	.	.	.	.	.	.	.	.	.	.	.	.	.	.	.	.	.	.	.	.	.	.	.	.	.
22880	22q12.2	22	31345795	31345795	G	A	G>A	MORC2	exonic	nonsynonymous SNV	DDD4K.03548	DDD_2017	28135719	4293	0	exome	Developmental Delay (DD)	psychiatric disorder	validated	.	non-ssc	.	MORC2:NM_001303256:exon5:c.C260T:p.S87L,MORC2:NM_001303257:exon5:c.C260T:p.S87L,MORC2:NM_014941:exon6:c.C74T:p.S25L	.	.	.	.	.	.	.	.	.	.	.	.	.	.	.	.	.	.	.	rs864309504	COSM6033370;COSM6033369	1(large_intestine)	Pathogenic	Charcot-Marie-Tooth_disease\x2c_axonal\x2c_type_2z	RCV000202460.4	MedGen:OMIM
22880	22q12.2	22	31354670	31354670	C	T	C>T	MORC2	exonic	nonsynonymous SNV	DDD4K.02395	DDD_2017	28135719	4293	0	exome	Developmental Delay (DD)	psychiatric disorder	validated	.	non-ssc	.	MORC2:NM_001303256:exon2:c.G79A:p.E27K,MORC2:NM_001303257:exon2:c.G79A:p.E27K	.	.	.	.	.	.	.	.	.	.	.	.	.	.	.	.	.	.	.	.	COSM4840492	1(cervix)	.	.	.	.
27124	22q12.2	22	31524540	31524540	G	A	G>A	INPP5J	exonic	nonsynonymous SNV	DDD4K.03002	DDD_2017	28135719	4293	0	exome	Developmental Delay (DD)	psychiatric disorder	validated	.	non-ssc	.	INPP5J:NM_001284287:exon8:c.G788A:p.R263Q,INPP5J:NM_001002837:exon9:c.G989A:p.R330Q,INPP5J:NM_001284285:exon9:c.G2093A:p.R698Q,INPP5J:NM_001284286:exon10:c.G1892A:p.R631Q,INPP5J:NM_001284288:exon10:c.G992A:p.R331Q,INPP5J:NM_001284289:exon11:c.G992A:p.R331Q	.	.	.	.	.	.	1.67e-05	0.0002	0	0	0	0	0	0	0.0002	0.0005	.	.	.	rs375990503	COSM478883;COSM478882	1(kidney)	.	.	.	.
11078	22q13.1	22	38155218	38155218	A	G	A>G	TRIOBP	exonic	nonsynonymous SNV	DDD4K.00088	DDD_2017	28135719	4293	0	exome	Developmental Delay (DD)	psychiatric disorder	validated	.	non-ssc	.	TRIOBP:NM_007032:exon7:c.A1132G:p.S378G,TRIOBP:NM_138632:exon7:c.A1132G:p.S378G,TRIOBP:NM_001039141:exon17:c.A6271G:p.S2091G	.	.	.	.	.	.	.	.	.	.	.	.	.	.	.	.	.	.	.	.	.	.	.	.	.	.
1454;NA	22q13.1	22	38696896	38696896	T	C	T>C	CSNK1E;LOC400927-CSNK1E	exonic	nonsynonymous SNV	DDD4K.01571	DDD_2017	28135719	4293	0	exome	Developmental Delay (DD)	psychiatric disorder	validated	.	non-ssc	.	CSNK1E:NM_001894:exon5:c.A398G:p.N133S,CSNK1E:NM_152221:exon5:c.A398G:p.N133S,LOC400927-CSNK1E:NM_001289912:exon9:c.A398G:p.N133S	.	.	.	.	.	.	.	.	.	.	.	.	.	.	.	.	.	.	.	.	COSM1661314;COSM1661313;COSM1661312	1(kidney)	.	.	.	.
3761	22q13.1	22	38824137	38824137	T	C	T>C	KCNJ4	exonic	nonsynonymous SNV	DDD4K.00591	DDD_2017	28135719	4293	0	exome	Developmental Delay (DD)	psychiatric disorder	validated	.	non-ssc	.	KCNJ4:NM_004981:exon2:c.A1G:p.M1V,KCNJ4:NM_152868:exon2:c.A1G:p.M1V	.	.	.	.	.	.	.	.	.	.	.	.	.	.	.	.	.	.	.	.	.	.	.	.	.	.
11015	22q13.1	22	38877370	38877370	C	T	C>T	KDELR3	exonic	nonsynonymous SNV	DDD4K.00664	DDD_2017	28135719	4293	0	exome	Developmental Delay (DD)	psychiatric disorder	validated	.	non-ssc	.	KDELR3:NM_006855:exon4:c.C505T:p.R169W,KDELR3:NM_016657:exon4:c.C505T:p.R169W	.	.	.	.	.	.	4.94e-05	9.61e-05	8.64e-05	0	0	4.5e-05	0	6.06e-05	0.0001	0.0002	.	.	.	rs142169266	.	.	.	.	.	.
9929	22q13.1	22	39095868	39095868	T	C	T>C	JOSD1	exonic	nonsynonymous SNV	DDD4K.02523	DDD_2017	28135719	4293	0	exome	Developmental Delay (DD)	psychiatric disorder	validated	.	non-ssc	.	JOSD1:NM_014876:exon1:c.A125G:p.N42S	.	.	.	.	.	.	.	.	.	.	.	.	.	.	.	.	.	.	.	.	.	.	.	.	.	.
9978	22q13.2	22	41368485	41368485	G	T	G>T	RBX1	exonic	nonsynonymous SNV	DDD4K.01750	DDD_2017	28135719	4293	0	exome	Developmental Delay (DD)	psychiatric disorder	validated	.	non-ssc	.	RBX1:NM_014248:exon5:c.G320T:p.G107V	.	.	.	.	.	.	.	.	.	.	.	.	.	.	.	.	.	.	.	.	.	.	.	.	.	.
6942	22q13.2	22	42607795	42607795	T	G	T>G	TCF20	exonic	nonsynonymous SNV	DDD4K.00676	DDD_2017	28135719	4293	0	exome	Developmental Delay (DD)	psychiatric disorder	validated	.	non-ssc	.	TCF20:NM_181492:exon1:c.A3517C:p.K1173Q,TCF20:NM_005650:exon2:c.A3517C:p.K1173Q	.	.	.	.	.	.	.	.	.	.	.	.	.	.	.	.	.	.	.	.	.	.	.	.	.	.
85378	22q13.33	22	50664746	50664746	G	C	G>C	TUBGCP6	exonic	nonsynonymous SNV	DDD4K.02595	DDD_2017	28135719	4293	0	exome	Developmental Delay (DD)	psychiatric disorder	validated	.	non-ssc	.	TUBGCP6:NM_020461:exon8:c.C1663G:p.Q555E	.	.	.	.	.	.	.	.	.	.	.	.	.	.	.	.	.	.	.	.	.	.	.	.	.	.
3708	3p26.1	3	4687356	4687356	A	G	A>G	ITPR1	exonic	nonsynonymous SNV	DDD4K.04234	DDD_2017	28135719	4293	0	exome	Developmental Delay (DD)	psychiatric disorder	validated	.	non-ssc	.	ITPR1:NM_001099952:exon10:c.A799G:p.T267A,ITPR1:NM_001168272:exon10:c.A799G:p.T267A,ITPR1:NM_002222:exon10:c.A799G:p.T267A	.	.	.	.	.	.	.	.	.	.	.	.	.	.	.	.	.	.	.	.	.	.	.	.	.	.
3708	3p26.1	3	4687362	4687362	C	T	C>T	ITPR1	exonic	nonsynonymous SNV	DDD4K.03786	DDD_2017	28135719	4293	0	exome	Developmental Delay (DD)	psychiatric disorder	validated	.	non-ssc	.	ITPR1:NM_001099952:exon10:c.C805T:p.R269W,ITPR1:NM_001168272:exon10:c.C805T:p.R269W,ITPR1:NM_002222:exon10:c.C805T:p.R269W	.	.	.	.	.	.	.	.	.	.	.	.	.	.	.	.	.	.	.	.	COSM1423426;COSM1423428;COSM1423427	1(large_intestine)	Pathogenic	not_provided	RCV000254736.1	MedGen
3708	3p26.1	3	4856205	4856205	G	A	G>A	ITPR1	exonic	nonsynonymous SNV	DDD4K.00055	DDD_2017	28135719	4293	0	exome	Developmental Delay (DD)	psychiatric disorder	validated	.	non-ssc	.	ITPR1:NM_002222:exon54:c.G7471A:p.G2491R,ITPR1:NM_001099952:exon55:c.G7516A:p.G2506R,ITPR1:NM_001168272:exon57:c.G7615A:p.G2539R	.	.	.	.	.	.	8.28e-06	0.0001	0	0	0	0	0	0	.	.	.	.	.	rs752281590	COSM5898207;COSM5898206;COSM5898205	1(skin)	Pathogenic\x2cPathogenic	Gillespie_syndrome\x2cGillespie_syndrome	RCV000224995.2\x2cRCV000224996.2	SNOMED_CT\x2cSNOMED_CT
84818	3p25.3	3	9970142	9970142	C	T	C>T	IL17RC	exonic	nonsynonymous SNV	DDD4K.03045	DDD_2017	28135719	4293	0	exome	Developmental Delay (DD)	psychiatric disorder	validated	.	non-ssc	.	IL17RC:NM_001203265:exon10:c.C986T:p.P329L,IL17RC:NM_032732:exon10:c.C986T:p.P329L,IL17RC:NM_001203263:exon11:c.C1031T:p.P344L,IL17RC:NM_001203264:exon11:c.C1031T:p.P344L,IL17RC:NM_153460:exon11:c.C1031T:p.P344L,IL17RC:NM_153461:exon11:c.C1244T:p.P415L	0.0002	.	.	0.001	.	.	0.0003	0.0005	8.71e-05	0.0002	0.0002	0.0003	0	0	0.0001	0.0002	.	.	.	rs151311782	COSM1567087	1(large_intestine)	.	.	.	.
2177	3p25.3	3	10136894	10136894	T	G	T>G	FANCD2	exonic	nonsynonymous SNV	DDD4K.02005	DDD_2017	28135719	4293	0	exome	Developmental Delay (DD)	psychiatric disorder	validated	.	non-ssc	.	FANCD2:NM_001018115:exon41:c.T3974G:p.L1325R,FANCD2:NM_001319984:exon41:c.T3974G:p.L1325R,FANCD2:NM_033084:exon41:c.T3974G:p.L1325R	.	.	.	.	.	.	.	.	.	.	.	.	.	.	.	.	.	.	.	.	.	.	.	.	.	.
6529	3p25.3	3	11059027	11059027	C	T	C>T	SLC6A1	exonic	nonsynonymous SNV	DDD4K.02343	DDD_2017	28135719	4293	0	exome	Developmental Delay (DD)	psychiatric disorder	validated	.	non-ssc	.	SLC6A1:NM_001348250:exon3:c.C130T:p.R44W,SLC6A1:NM_003042:exon3:c.C130T:p.R44W	.	.	.	.	.	.	.	.	.	.	.	.	.	.	.	.	.	.	.	.	COSM4619207	1(large_intestine)	.	.	.	.
6529	3p25.3	3	11059084	11059084	G	A	G>A	SLC6A1	exonic	nonsynonymous SNV	DDD4K.02633	DDD_2017	28135719	4293	0	exome	Developmental Delay (DD)	psychiatric disorder	validated	.	non-ssc	.	SLC6A1:NM_001348250:exon3:c.G187A:p.G63S,SLC6A1:NM_003042:exon3:c.G187A:p.G63S	.	.	.	.	.	.	.	.	.	.	.	.	.	.	.	.	.	.	.	.	.	.	Likely pathogenic	not_provided	RCV000422208.1	MedGen
6529	3p25.3	3	11059621	11059621	G	A	G>A	SLC6A1	exonic	nonsynonymous SNV	DDD4K.03404	DDD_2017	28135719	4293	0	exome	Developmental Delay (DD)	psychiatric disorder	validated	.	non-ssc	.	SLC6A1:NM_001348250:exon4:c.G331A:p.G111R,SLC6A1:NM_003042:exon4:c.G331A:p.G111R	.	.	.	.	.	.	.	.	.	.	.	.	.	.	.	.	.	.	.	.	COSM5344296	1(large_intestine)	.	.	.	.
6529	3p25.3	3	11060296	11060296	C	T	C>T	SLC6A1	exonic	nonsynonymous SNV	DDD4K.02815	DDD_2017	28135719	4293	0	exome	Developmental Delay (DD)	psychiatric disorder	validated	.	non-ssc	.	SLC6A1:NM_001348250:exon5:c.C383T:p.A128V,SLC6A1:NM_001348251:exon5:c.C23T:p.A8V,SLC6A1:NM_003042:exon5:c.C383T:p.A128V	.	.	.	.	.	.	.	.	.	.	.	.	.	.	.	.	.	.	.	.	.	.	.	.	.	.
6529	3p25.3	3	11067522	11067522	G	A	G>A	SLC6A1	exonic	nonsynonymous SNV	DDD4K.02820	DDD_2017	28135719	4293	0	exome	Developmental Delay (DD)	psychiatric disorder	validated	.	non-ssc	.	SLC6A1:NM_001348252:exon8:c.G379A:p.A127T,SLC6A1:NM_001348253:exon8:c.G379A:p.A127T,SLC6A1:NM_001348250:exon9:c.G913A:p.A305T,SLC6A1:NM_001348251:exon9:c.G553A:p.A185T,SLC6A1:NM_003042:exon9:c.G913A:p.A305T	.	.	.	.	.	.	.	.	.	.	.	.	.	.	.	.	.	.	.	.	.	.	.	.	.	.
6529	3p25.3	3	11067538	11067538	A	T	A>T	SLC6A1	exonic	nonsynonymous SNV	DDD4K.02316	DDD_2017	28135719	4293	0	exome	Developmental Delay (DD)	psychiatric disorder	validated	.	non-ssc	.	SLC6A1:NM_001348252:exon8:c.A395T:p.N132I,SLC6A1:NM_001348253:exon8:c.A395T:p.N132I,SLC6A1:NM_001348250:exon9:c.A929T:p.N310I,SLC6A1:NM_001348251:exon9:c.A569T:p.N190I,SLC6A1:NM_003042:exon9:c.A929T:p.N310I	.	.	.	.	.	.	.	.	.	.	.	.	.	.	.	.	.	.	.	.	.	.	.	.	.	.
80746	3p25.2	3	12531346	12531346	A	G	A>G	TSEN2	exonic	nonsynonymous SNV	DDD4K.04114	DDD_2017	28135719	4293	0	exome	Developmental Delay (DD)	psychiatric disorder	validated	.	non-ssc	.	TSEN2:NM_001145392:exon2:c.A47G:p.Y16C,TSEN2:NM_001145393:exon2:c.A47G:p.Y16C,TSEN2:NM_001145394:exon2:c.A47G:p.Y16C,TSEN2:NM_001321277:exon2:c.A47G:p.Y16C,TSEN2:NM_001321278:exon2:c.A47G:p.Y16C,TSEN2:NM_001321279:exon2:c.A47G:p.Y16C,TSEN2:NM_025265:exon2:c.A47G:p.Y16C	.	.	.	.	.	.	8.27e-06	0	0	0	0.0002	0	0	0	.	.	.	.	.	rs773948630	.	.	.	.	.	.
7324	3p24.2	3	23930720	23930720	A	G	A>G	UBE2E1	exonic	nonsynonymous SNV	DDD4K.04036	DDD_2017	28135719	4293	0	exome	Developmental Delay (DD)	psychiatric disorder	validated	.	non-ssc	.	UBE2E1:NM_001202476:exon4:c.A355G:p.I119V,UBE2E1:NM_182666:exon4:c.A403G:p.I135V,UBE2E1:NM_003341:exon5:c.A454G:p.I152V	.	.	.	.	.	.	.	.	.	.	.	.	.	.	.	.	.	.	.	.	.	.	.	.	.	.
2720	3p22.3	3	33065796	33065796	G	A	G>A	GLB1	exonic	nonsynonymous SNV	DDD4K.00250	DDD_2017	28135719	4293	0	exome	Developmental Delay (DD)	psychiatric disorder	validated	.	non-ssc	.	GLB1:NM_001135602:exon8:c.C697T:p.P233S,GLB1:NM_000404:exon11:c.C1090T:p.P364S,GLB1:NM_001079811:exon11:c.C1000T:p.P334S,GLB1:NM_001317040:exon12:c.C1234T:p.P412S	.	.	.	.	.	.	.	.	.	.	.	.	.	.	.	.	.	.	.	.	COSM3592504;COSM3592505	1(skin)	.	.	.	.
3680	3p22.2	3	37523015	37523015	A	T	A>T	ITGA9	exonic	nonsynonymous SNV	DDD4K.01767	DDD_2017	28135719	4293	0	exome	Developmental Delay (DD)	psychiatric disorder	validated	.	non-ssc	.	ITGA9:NM_002207:exon4:c.A461T:p.D154V	.	.	.	.	.	.	.	.	.	.	.	.	.	.	.	.	.	.	.	.	.	.	.	.	.	.
50853	3p22.2	3	38037255	38037255	G	C	G>C	VILL	exonic	nonsynonymous SNV	DDD4K.00095	DDD_2017	28135719	4293	0	exome	Developmental Delay (DD)	psychiatric disorder	validated	.	non-ssc	.	VILL:NM_015873:exon4:c.G367C:p.D123H	.	.	.	.	.	.	8.24e-06	0	8.65e-05	0	0	0	0	0	.	.	.	.	.	rs754010420	.	.	.	.	.	.
4820	3p22.1	3	42678734	42678734	A	G	A>G	NKTR	exonic	nonsynonymous SNV	DDD4K.00276	DDD_2017	28135719	4293	0	exome	Developmental Delay (DD)	psychiatric disorder	validated	.	non-ssc	.	NKTR:NM_001349124:exon13:c.A1538G:p.H513R,NKTR:NM_005385:exon13:c.A1538G:p.H513R,NKTR:NM_001349125:exon15:c.A779G:p.H260R,NKTR:NM_001349126:exon15:c.A434G:p.H145R	.	.	.	.	.	.	8.3e-06	0	0	0	0	1.51e-05	0	0	.	.	.	.	.	rs769101395	.	.	.	.	.	.
375337	3p21.31	3	44308517	44308517	G	A	G>A	TOPAZ1	exonic	nonsynonymous SNV	DDD4K.03484	DDD_2017	28135719	4293	0	exome	Developmental Delay (DD)	psychiatric disorder	validated	.	non-ssc	.	TOPAZ1:NM_001145030:exon6:c.G3049A:p.V1017I	.	.	.	.	.	.	.	.	.	.	.	.	.	.	.	.	.	.	.	.	.	.	.	.	.	.
10168;110354863	3p21.31	3	44684703	44684703	T	C	T>C	ZNF197;ZNF660-ZNF197	exonic	nonsynonymous SNV	DDD4K.01311	DDD_2017	28135719	4293	0	exome	Developmental Delay (DD)	psychiatric disorder	validated	.	non-ssc	.	ZNF197:NM_001323296:exon5:c.T1442C:p.I481T,ZNF197:NM_001323293:exon6:c.T2081C:p.I694T,ZNF197:NM_006991:exon6:c.T2081C:p.I694T,ZNF197:NM_001323295:exon7:c.T1472C:p.I491T,ZNF660-ZNF197:NM_001351732:exon7:c.T2081C:p.I694T,ZNF660-ZNF197:NM_001351733:exon7:c.T2081C:p.I694T	.	.	.	.	.	.	4.15e-05	0	8.69e-05	0	0	6.02e-05	0	0	0.0001	.	0.0001	.	.	rs150554547	.	.	.	.	.	.
131616	3p21.31	3	44905834	44905834	C	T	C>T	TMEM42	exonic	nonsynonymous SNV	DDD4K.00550	DDD_2017	28135719	4293	0	exome	Developmental Delay (DD)	psychiatric disorder	validated	.	non-ssc	.	TMEM42:NM_144638:exon2:c.C338T:p.S113L	.	.	.	.	.	.	4.94e-05	0	0	0	0	7.5e-05	0	6.06e-05	0.0001	.	0.0001	.	.	rs142670871	.	.	.	.	.	.
54716	3p21.31	3	45804421	45804421	C	T	C>T	SLC6A20	exonic	nonsynonymous SNV	DDD4K.03968	DDD_2017	28135719	4293	0	exome	Developmental Delay (DD)	psychiatric disorder	validated	.	non-ssc	.	SLC6A20:NM_022405:exon8:c.G1336A:p.V446M,SLC6A20:NM_020208:exon9:c.G1447A:p.V483M	0.0002	.	0.0014	.	.	.	3.3e-05	0	8.64e-05	0	0	4.5e-05	0	0	0.0001	.	0.0001	.	.	rs146575685	COSM6033426;COSM6033425	1(large_intestine)	.	.	.	.
79443	3p21.31	3	46016800	46016800	C	T	C>T	FYCO1	exonic	nonsynonymous SNV	DDD4K.03617	DDD_2017	28135719	4293	0	exome	Developmental Delay (DD)	psychiatric disorder	validated	.	non-ssc	.	FYCO1:NM_024513:exon5:c.G326A:p.R109H	.	.	.	.	.	.	8.24e-06	0	0	0.0001	0	0	0	0	.	.	.	.	.	rs761031320	.	.	.	.	.	.
23218	3p21.31	3	47049362	47049362	C	T	C>T	NBEAL2	exonic	nonsynonymous SNV	DDD4K.00923	DDD_2017	28135719	4293	0	exome	Developmental Delay (DD)	psychiatric disorder	validated	.	non-ssc	.	NBEAL2:NM_015175:exon49:c.C7564T:p.R2522W	.	.	.	.	.	.	.	.	.	.	.	.	.	.	.	.	.	.	.	.	.	.	.	.	.	.
23276	3p21.31	3	47374777	47374777	A	G	A>G	KLHL18	exonic	nonsynonymous SNV	DDD4K.04137	DDD_2017	28135719	4293	0	exome	Developmental Delay (DD)	psychiatric disorder	validated	.	non-ssc	.	KLHL18:NM_025010:exon5:c.A731G:p.D244G	.	.	.	.	.	.	.	.	.	.	.	.	.	.	.	.	.	.	.	.	.	.	.	.	.	.
22907	3p21.31	3	47889737	47889737	G	A	G>A	DHX30	exonic	nonsynonymous SNV	DDD4K.00228	DDD_2017	28135719	4293	0	exome	Developmental Delay (DD)	psychiatric disorder	validated	.	non-ssc	.	DHX30:NM_138615:exon15:c.G2354A:p.R785H,DHX30:NM_001330990:exon16:c.G2270A:p.R757H,DHX30:NM_014966:exon16:c.G2237A:p.R746H	.	.	.	.	.	.	.	.	.	.	.	.	.	.	.	.	.	.	.	.	.	.	.	.	.	.
7384	3p21.31	3	48643235	48643235	C	A	C>A	UQCRC1	exonic	nonsynonymous SNV	DDD4K.03533	DDD_2017	28135719	4293	0	exome	Developmental Delay (DD)	psychiatric disorder	validated	.	non-ssc	.	UQCRC1:NM_003365:exon3:c.G265T:p.A89S	.	.	.	.	.	.	0.0002	0.0003	0.0003	0	0	0.0002	0.0011	0	0.0002	0.0002	0.0001	0.011	.	rs201250580	.	.	.	.	.	.
3615	3p21.31	3	49065217	49065217	G	A	G>A	IMPDH2	exonic	nonsynonymous SNV	DDD4K.02667	DDD_2017	28135719	4293	0	exome	Developmental Delay (DD)	psychiatric disorder	validated	.	non-ssc	.	IMPDH2:NM_000884:exon5:c.C457T:p.R153C	.	.	.	.	.	.	0.0002	0	0.0004	0	0	0.0002	0	0	0.0002	.	0.0002	.	.	rs369552560	.	.	.	.	.	.
23132	3p21.2	3	51690030	51690030	C	T	C>T	RAD54L2	exonic	nonsynonymous SNV	DDD4K.03419	DDD_2017	28135719	4293	0	exome	Developmental Delay (DD)	psychiatric disorder	validated	.	non-ssc	.	RAD54L2:NM_001322256:exon19:c.C3070T:p.R1024C,RAD54L2:NM_001322257:exon19:c.C1837T:p.R613C,RAD54L2:NM_015106:exon20:c.C3070T:p.R1024C,RAD54L2:NM_001322253:exon21:c.C3070T:p.R1024C	.	.	.	.	.	.	.	.	.	.	.	.	.	.	.	.	.	.	.	.	COSM2852022	1(large_intestine)	.	.	.	.
27086	3p13	3	71026816	71026816	G	A	G>A	FOXP1	exonic	nonsynonymous SNV	DDD4K.01981	DDD_2017	28135719	4293	0	exome	Developmental Delay (DD)	psychiatric disorder	validated	.	non-ssc	.	FOXP1:NM_001244813:exon10:c.C1106T:p.T369I,FOXP1:NM_001349344:exon10:c.C1103T:p.T368I,FOXP1:NM_001244812:exon11:c.C1178T:p.T393I,FOXP1:NM_001244815:exon11:c.C1412T:p.T471I,FOXP1:NM_001349337:exon11:c.C1409T:p.T470I,FOXP1:NM_001349342:exon11:c.C1106T:p.T369I,FOXP1:NM_001349343:exon11:c.C1103T:p.T368I,FOXP1:NM_001244814:exon12:c.C1406T:p.T469I,FOXP1:NM_001244816:exon15:c.C1406T:p.T469I,FOXP1:NM_001…	.	.	.	.	.	.	.	.	.	.	.	.	.	.	.	.	.	.	.	.	.	.	.	.	.	.
27086	3p13	3	71026825	71026825	G	A	G>A	FOXP1	exonic	nonsynonymous SNV	DDD4K.02046	DDD_2017	28135719	4293	0	exome	Developmental Delay (DD)	psychiatric disorder	validated	.	non-ssc	.	FOXP1:NM_001244813:exon10:c.C1097T:p.P366L,FOXP1:NM_001349344:exon10:c.C1094T:p.P365L,FOXP1:NM_001244812:exon11:c.C1169T:p.P390L,FOXP1:NM_001244815:exon11:c.C1403T:p.P468L,FOXP1:NM_001349337:exon11:c.C1400T:p.P467L,FOXP1:NM_001349342:exon11:c.C1097T:p.P366L,FOXP1:NM_001349343:exon11:c.C1094T:p.P365L,FOXP1:NM_001244814:exon12:c.C1397T:p.P466L,FOXP1:NM_001244816:exon15:c.C1397T:p.P466L,FOXP1:NM_001…	.	.	.	.	.	.	.	.	.	.	.	.	.	.	.	.	.	.	.	.	.	.	.	.	.	.
6092	3p12.3	3	77637907	77637907	C	T	C>T	ROBO2	exonic	nonsynonymous SNV	DDD4K.04031	DDD_2017	28135719	4293	0	exome	Developmental Delay (DD)	psychiatric disorder	validated	.	non-ssc	.	ROBO2:NM_002942:exon17:c.C2506T:p.R836C,ROBO2:NM_001290039:exon18:c.C2518T:p.R840C,ROBO2:NM_001290040:exon18:c.C2518T:p.R840C,ROBO2:NM_001290065:exon18:c.C727T:p.R243C	.	.	.	.	.	.	.	.	.	.	.	.	.	.	.	.	.	.	.	.	COSM584926;COSM584927	1(lung);1(large_intestine);1(endometrium)	.	.	.	.
6091	3p12.3	3	78666808	78666808	C	A	C>A	ROBO1	exonic	nonsynonymous SNV	DDD4K.00642	DDD_2017	28135719	4293	0	exome	Developmental Delay (DD)	psychiatric disorder	validated	.	non-ssc	.	ROBO1:NM_001145845:exon25:c.G3959T:p.R1320L,ROBO1:NM_133631:exon25:c.G4124T:p.R1375L,ROBO1:NM_002941:exon27:c.G4259T:p.R1420L	.	.	.	.	.	.	.	.	.	.	.	.	.	.	.	.	.	.	.	.	.	.	.	.	.	.
55076	3q12.2	3	100275696	100275696	C	T	C>T	TMEM45A	exonic	nonsynonymous SNV	DDD4K.02103	DDD_2017	28135719	4293	0	exome	Developmental Delay (DD)	psychiatric disorder	validated	.	non-ssc	.	TMEM45A:NM_018004:exon3:c.C283T:p.H95Y	.	.	.	.	.	.	.	.	.	.	.	.	.	.	.	.	.	.	.	.	COSM5463949	1(large_intestine)	.	.	.	.
56987	3q13.12	3	107497271	107497271	A	G	A>G	BBX	exonic	nonsynonymous SNV	DDD4K.04059	DDD_2017	28135719	4293	0	exome	Developmental Delay (DD)	psychiatric disorder	validated	.	non-ssc	.	BBX:NM_001276286:exon12:c.A1099G:p.I367V,BBX:NM_001142568:exon13:c.A2108G:p.Y703C,BBX:NM_020235:exon13:c.A2108G:p.Y703C	.	.	.	.	.	.	.	.	.	.	.	.	.	.	.	.	.	.	.	.	.	.	.	.	.	.
26137	3q13.31	3	114070420	114070420	C	G	C>G	ZBTB20	exonic	nonsynonymous SNV	DDD4K.01745	DDD_2017	28135719	4293	0	exome	Developmental Delay (DD)	psychiatric disorder	validated	.	non-ssc	.	ZBTB20:NM_001164342:exon4:c.G505C:p.E169Q,ZBTB20:NM_001164346:exon5:c.G286C:p.E96Q,ZBTB20:NM_001164347:exon5:c.G286C:p.E96Q,ZBTB20:NM_001164345:exon6:c.G286C:p.E96Q,ZBTB20:NM_001164344:exon7:c.G286C:p.E96Q,ZBTB20:NM_001348804:exon9:c.G286C:p.E96Q,ZBTB20:NM_015642:exon9:c.G286C:p.E96Q,ZBTB20:NM_001348802:exon10:c.G286C:p.E96Q,ZBTB20:NM_001348805:exon10:c.G286C:p.E96Q,ZBTB20:NM_001164343:exon11:c.G…	.	.	.	.	.	.	.	.	.	.	.	.	.	.	.	.	.	.	.	.	.	.	.	.	.	.
57514	3q13.33	3	119133903	119133903	G	A	G>A	ARHGAP31	exonic	nonsynonymous SNV	DDD4K.04114	DDD_2017	28135719	4293	0	exome	Developmental Delay (DD)	psychiatric disorder	validated	.	non-ssc	.	ARHGAP31:NM_020754:exon12:c.G3127A:p.G1043R	.	.	.	.	.	.	.	.	.	.	.	.	.	.	.	.	.	.	.	.	.	.	.	.	.	.
4710	3q13.33	3	120319997	120319997	A	G	A>G	NDUFB4	exonic	nonsynonymous SNV	DDD4K.01986	DDD_2017	28135719	4293	0	exome	Developmental Delay (DD)	psychiatric disorder	validated	.	non-ssc	.	NDUFB4:NM_001168331:exon2:c.A220G:p.I74V,NDUFB4:NM_004547:exon2:c.A220G:p.I74V	.	.	.	.	.	.	.	.	.	.	.	.	.	.	.	.	.	.	.	.	.	.	.	.	.	.
2804	3q13.33	3	121395745	121395745	T	C	T>C	GOLGB1	exonic	nonsynonymous SNV	DDD4K.00853	DDD_2017	28135719	4293	0	exome	Developmental Delay (DD)	psychiatric disorder	validated	.	non-ssc	.	GOLGB1:NM_001256488:exon16:c.A8932G:p.S2978G,GOLGB1:NM_001256486:exon17:c.A9172G:p.S3058G,GOLGB1:NM_001256487:exon17:c.A9055G:p.S3019G,GOLGB1:NM_004487:exon17:c.A9157G:p.S3053G	.	.	.	.	.	.	.	.	.	.	.	.	.	.	.	.	.	.	.	.	.	.	.	.	.	.
83666	3q21.1	3	122247389	122247389	A	C	A>C	PARP9	exonic	nonsynonymous SNV	DDD4K.01363	DDD_2017	28135719	4293	0	exome	Developmental Delay (DD)	psychiatric disorder	validated	.	non-ssc	.	PARP9:NM_001146102:exon11:c.T2387G:p.V796G,PARP9:NM_001146103:exon11:c.T2282G:p.V761G,PARP9:NM_001146104:exon11:c.T2282G:p.V761G,PARP9:NM_001146105:exon11:c.T2282G:p.V761G,PARP9:NM_031458:exon11:c.T2387G:p.V796G	.	.	.	.	.	.	.	.	.	.	.	.	.	.	.	.	.	.	.	.	.	.	.	.	.	.
165631	3q21.1	3	122350976	122350976	T	G	T>G	PARP15	exonic	nonsynonymous SNV	DDD4K.00024	DDD_2017	28135719	4293	0	exome	Developmental Delay (DD)	psychiatric disorder	validated	.	non-ssc	.	PARP15:NM_001308321:exon5:c.T573G:p.F191L,PARP15:NM_152615:exon6:c.T780G:p.F260L,PARP15:NM_001308320:exon7:c.T897G:p.F299L,PARP15:NM_001113523:exon10:c.T1482G:p.F494L	.	.	.	.	.	.	.	.	.	.	.	.	.	.	.	.	.	.	.	.	.	.	.	.	.	.
10954	3q21.1	3	122865034	122865034	A	G	A>G	PDIA5	exonic	nonsynonymous SNV	DDD4K.01196	DDD_2017	28135719	4293	0	exome	Developmental Delay (DD)	psychiatric disorder	validated	.	non-ssc	.	PDIA5:NM_006810:exon13:c.A1070G:p.Y357C	.	.	.	.	.	.	.	.	.	.	.	.	.	.	.	.	.	.	.	.	.	.	.	.	.	.
57493	3q21.2	3	124738148	124738148	A	C	A>C	HEG1	exonic	nonsynonymous SNV	DDD4K.01173	DDD_2017	28135719	4293	0	exome	Developmental Delay (DD)	psychiatric disorder	validated	.	non-ssc	.	HEG1:NM_020733:exon5:c.T1546G:p.S516A	.	.	.	.	.	.	.	.	.	.	.	.	.	.	.	.	.	.	.	.	.	.	.	.	.	.
10840	3q21.3	3	125831632	125831632	C	T	C>T	ALDH1L1	exonic	nonsynonymous SNV	DDD4K.02680	DDD_2017	28135719	4293	0	exome	Developmental Delay (DD)	psychiatric disorder	validated	.	non-ssc	.	ALDH1L1:NM_001270365:exon17:c.G1871A:p.R624Q,ALDH1L1:NM_001270364:exon19:c.G2204A:p.R735Q,ALDH1L1:NM_012190:exon19:c.G2174A:p.R725Q	0.0002	0.0008	.	.	.	.	2.48e-05	9.68e-05	0	0	0	3.01e-05	0	0	0.0001	.	0.0001	.	.	rs141756791	.	.	.	.	.	.
5361	3q21.3	3	126733040	126733040	G	A	G>A	PLXNA1	exonic	nonsynonymous SNV	DDD4K.02067	DDD_2017	28135719	4293	0	exome	Developmental Delay (DD)	psychiatric disorder	validated	.	non-ssc	.	PLXNA1:NM_032242:exon11:c.G2426A:p.C809Y	.	.	.	.	.	.	.	.	.	.	.	.	.	.	.	.	.	.	.	.	.	.	.	.	.	.
5361	3q21.3	3	126736629	126736629	G	A	G>A	PLXNA1	exonic	nonsynonymous SNV	DDD4K.00910	DDD_2017	28135719	4293	0	exome	Developmental Delay (DD)	psychiatric disorder	validated	.	non-ssc	.	PLXNA1:NM_032242:exon18:c.G3554A:p.R1185Q	.	.	.	.	.	.	8.37e-06	0	0	0	0	1.53e-05	0	0	0.0001	.	0.0001	.	.	rs375833812	.	.	.	.	.	.
50512	3q21.3	3	127387293	127387293	C	T	C>T	PODXL2	exonic	nonsynonymous SNV	DDD4K.02126	DDD_2017	28135719	4293	0	exome	Developmental Delay (DD)	psychiatric disorder	validated	.	non-ssc	.	PODXL2:NM_015720:exon5:c.C1216T:p.R406W	.	.	.	.	.	.	.	.	.	.	.	.	.	.	.	.	.	.	.	.	.	.	.	.	.	.
166348	3q21.3	3	127642480	127642480	G	C	G>C	KBTBD12	exonic	nonsynonymous SNV	DDD4K.00582	DDD_2017	28135719	4293	0	exome	Developmental Delay (DD)	psychiatric disorder	validated	.	non-ssc	.	KBTBD12:NM_207335:exon1:c.G576C:p.E192D	.	.	.	.	.	.	.	.	.	.	.	.	.	.	.	.	.	.	.	.	.	.	.	.	.	.
23129	3q22.1	3	129275226	129275226	G	C	G>C	PLXND1	exonic	nonsynonymous SNV	DDD4K.00002	DDD_2017	28135719	4293	0	exome	Developmental Delay (DD)	psychiatric disorder	validated	.	non-ssc	.	PLXND1:NM_015103:exon36:c.C5707G:p.L1903V	.	.	.	.	.	.	.	.	.	.	.	.	.	.	.	.	.	.	.	.	.	.	.	.	.	.
28990	3q22.1	3	130743432	130743432	C	A	C>A	ASTE1	exonic	nonsynonymous SNV	DDD4K.01594	DDD_2017	28135719	4293	0	exome	Developmental Delay (DD)	psychiatric disorder	validated	.	non-ssc	.	ASTE1:NM_001288950:exon3:c.G719T:p.R240L,ASTE1:NM_014065:exon3:c.G719T:p.R240L	.	.	.	.	.	.	.	.	.	.	.	.	.	.	.	.	.	.	.	.	.	.	.	.	.	.
79858	3q22.1	3	130799416	130799416	T	G	T>G	NEK11	exonic	nonsynonymous SNV	DDD4K.03540	DDD_2017	28135719	4293	0	exome	Developmental Delay (DD)	psychiatric disorder	validated	.	non-ssc	.	NEK11:NM_001146003:exon3:c.T320G:p.I107S,NEK11:NM_001321220:exon3:c.T320G:p.I107S,NEK11:NM_001321222:exon3:c.T320G:p.I107S,NEK11:NM_001321223:exon3:c.T320G:p.I107S,NEK11:NM_001321221:exon4:c.T320G:p.I107S,NEK11:NM_024800:exon4:c.T320G:p.I107S,NEK11:NM_145910:exon4:c.T320G:p.I107S	.	.	.	.	.	.	.	.	.	.	.	.	.	.	.	.	.	.	.	.	.	.	.	.	.	.
131034	3q22.1	3	131300452	131300452	A	C	A>C	CPNE4	exonic	nonsynonymous SNV	DDD4K.01068	DDD_2017	28135719	4293	0	exome	Developmental Delay (DD)	psychiatric disorder	validated	.	non-ssc	.	CPNE4:NM_001289112:exon9:c.T892G:p.S298A,CPNE4:NM_130808:exon9:c.T838G:p.S280A,CPNE4:NM_153429:exon10:c.T892G:p.S298A	.	.	.	.	.	.	.	.	.	.	.	.	.	.	.	.	.	.	.	.	.	.	.	.	.	.
80254	3q22.2	3	134256004	134256004	G	A	G>A	CEP63	exonic	nonsynonymous SNV	DDD4K.00807	DDD_2017	28135719	4293	0	exome	Developmental Delay (DD)	psychiatric disorder	validated	.	non-ssc	.	CEP63:NM_001042383:exon6:c.G449A:p.R150H,CEP63:NM_001042384:exon6:c.G449A:p.R150H,CEP63:NM_001042400:exon6:c.G449A:p.R150H,CEP63:NM_025180:exon7:c.G449A:p.R150H	.	.	.	.	.	.	0.0002	0	0	0	0.0012	0.0003	0.0011	0	.	.	.	.	.	rs201316330	COSM4113756;COSM3122720	1(stomach);1(large_intestine)	.	.	.	.
80254	3q22.2	3	134278083	134278083	A	G	A>G	CEP63	exonic	nonsynonymous SNV	DDD4K.00772	DDD_2017	28135719	4293	0	exome	Developmental Delay (DD)	psychiatric disorder	validated	.	non-ssc	.	CEP63:NM_025180:exon15:c.A1765G:p.I589V	.	.	.	.	.	.	.	.	.	.	.	.	.	.	.	.	.	.	.	.	.	.	.	.	.	.
5523	3q22.3	3	135801165	135801165	A	G	A>G	PPP2R3A	exonic	nonsynonymous SNV	DDD4K.03280	DDD_2017	28135719	4293	0	exome	Developmental Delay (DD)	psychiatric disorder	validated	.	non-ssc	.	PPP2R3A:NM_001190447:exon7:c.A482G:p.Y161C,PPP2R3A:NM_181897:exon7:c.A827G:p.Y276C,PPP2R3A:NM_002718:exon8:c.A2690G:p.Y897C	.	.	.	.	.	.	.	.	.	.	.	.	.	.	.	.	.	.	.	.	.	.	.	.	.	.
55167	3q22.3	3	135870774	135870774	T	C	T>C	MSL2	exonic	nonsynonymous SNV	DDD4K.00642	DDD_2017	28135719	4293	0	exome	Developmental Delay (DD)	psychiatric disorder	validated	.	non-ssc	.	MSL2:NM_001145417:exon2:c.A727G:p.M243V,MSL2:NM_018133:exon2:c.A949G:p.M317V	.	.	.	.	.	.	.	.	.	.	.	.	.	.	.	.	.	.	.	.	COSM445651	1(breast)	.	.	.	.
10274	3q22.3	3	136240085	136240085	T	C	T>C	STAG1	exonic	nonsynonymous SNV	DDD4K.02389	DDD_2017	28135719	4293	0	exome	Developmental Delay (DD)	psychiatric disorder	validated	.	non-ssc	.	STAG1:NM_005862:exon7:c.A646G:p.R216G	.	.	.	.	.	.	.	.	.	.	.	.	.	.	.	.	.	.	.	.	.	.	.	.	.	.
26084	3q25.2	3	153840305	153840305	C	G	C>G	ARHGEF26	exonic	nonsynonymous SNV	DDD4K.02141	DDD_2017	28135719	4293	0	exome	Developmental Delay (DD)	psychiatric disorder	validated	.	non-ssc	.	ARHGEF26:NM_001251962:exon2:c.C524G:p.A175G,ARHGEF26:NM_001251963:exon2:c.C524G:p.A175G,ARHGEF26:NM_015595:exon2:c.C524G:p.A175G	.	.	.	.	.	.	.	.	.	.	.	.	.	.	.	.	.	.	.	.	.	.	.	.	.	.
170506	3q25.2	3	154024084	154024084	C	A	C>A	DHX36	exonic	nonsynonymous SNV	DDD4K.03859	DDD_2017	28135719	4293	0	exome	Developmental Delay (DD)	psychiatric disorder	validated	.	non-ssc	.	DHX36:NM_001114397:exon6:c.G814T:p.V272F,DHX36:NM_020865:exon6:c.G814T:p.V272F	.	.	.	.	.	.	.	.	.	.	.	.	.	.	.	.	.	.	.	.	.	.	.	.	.	.
79782	3q26.2	3	169572700	169572700	C	T	C>T	LRRC31	exonic	nonsynonymous SNV	DDD4K.02060	DDD_2017	28135719	4293	0	exome	Developmental Delay (DD)	psychiatric disorder	validated	.	non-ssc	.	LRRC31:NM_001277128:exon5:c.G724A:p.G242S,LRRC31:NM_001277127:exon6:c.G892A:p.G298S,LRRC31:NM_024727:exon6:c.G892A:p.G298S	.	.	.	.	.	.	.	.	.	.	.	.	.	.	.	.	.	.	.	.	.	.	.	.	.	.
6498	3q26.2	3	170099090	170099090	G	A	G>A	SKIL	exonic	nonsynonymous SNV	DDD4K.00043	DDD_2017	28135719	4293	0	exome	Developmental Delay (DD)	psychiatric disorder	validated	.	non-ssc	.	SKIL:NM_001145097:exon2:c.G1157A:p.G386D,SKIL:NM_001248008:exon2:c.G1157A:p.G386D,SKIL:NM_005414:exon3:c.G1157A:p.G386D,SKIL:NM_001145098:exon4:c.G1097A:p.G366D	.	.	.	.	.	.	.	.	.	.	.	.	.	.	.	.	.	.	.	.	.	.	.	.	.	.
56648	3q26.2	3	170624837	170624837	C	G	C>G	EIF5A2	exonic	nonsynonymous SNV	DDD4K.02746	DDD_2017	28135719	4293	0	exome	Developmental Delay (DD)	psychiatric disorder	validated	.	non-ssc	.	EIF5A2:NM_020390:exon3:c.G211C:p.D71H	.	.	.	.	.	.	.	.	.	.	.	.	.	.	.	.	.	.	.	.	.	.	.	.	.	.
79718	3q26.32	3	176750853	176750853	T	C	T>C	TBL1XR1	exonic	nonsynonymous SNV	DDD4K.02799	DDD_2017	28135719	4293	0	exome	Developmental Delay (DD)	psychiatric disorder	validated	.	non-ssc	.	TBL1XR1:NM_001321195:exon13:c.A1061G:p.H354R,TBL1XR1:NM_001321193:exon14:c.A1322G:p.H441R,TBL1XR1:NM_024665:exon14:c.A1322G:p.H441R,TBL1XR1:NM_001321194:exon15:c.A1322G:p.H441R	.	.	.	.	.	.	.	.	.	.	.	.	.	.	.	.	.	.	.	.	.	.	.	.	.	.
79718	3q26.32	3	176755900	176755900	C	A	C>A	TBL1XR1	exonic	nonsynonymous SNV	DDD4K.00011	DDD_2017	28135719	4293	0	exome	Developmental Delay (DD)	psychiatric disorder	validated	.	non-ssc	.	TBL1XR1:NM_001321195:exon11:c.G847T:p.D283Y,TBL1XR1:NM_001321193:exon12:c.G1108T:p.D370Y,TBL1XR1:NM_024665:exon12:c.G1108T:p.D370Y,TBL1XR1:NM_001321194:exon13:c.G1108T:p.D370Y	.	.	.	.	.	.	.	.	.	.	.	.	.	.	.	.	.	.	.	.	.	.	.	.	.	.
4026	3q28	3	188426104	188426104	G	A	G>A	LPP	exonic	nonsynonymous SNV	DDD4K.03828	DDD_2017	28135719	4293	0	exome	Developmental Delay (DD)	psychiatric disorder	validated	.	non-ssc	.	LPP:NM_001167672:exon6:c.G722A:p.R241H,LPP:NM_001167671:exon7:c.G1163A:p.R388H,LPP:NM_005578:exon7:c.G1163A:p.R388H	.	.	.	.	.	.	5.77e-05	9.61e-05	8.64e-05	0.0001	0.0002	3e-05	0	6.06e-05	0.0002	.	0.0002	.	.	rs371075090	.	.	.	.	.	.
285386	3q28	3	188925194	188925194	T	G	T>G	TPRG1	exonic	nonsynonymous SNV	DDD4K.01425	DDD_2017	28135719	4293	0	exome	Developmental Delay (DD)	psychiatric disorder	validated	.	non-ssc	.	TPRG1:NM_198485:exon2:c.T21G:p.F7L	.	.	.	.	.	.	.	.	.	.	.	.	.	.	.	.	.	.	.	.	.	.	.	.	.	.
2257	3q28	3	192053223	192053223	C	T	C>T	FGF12	exonic	nonsynonymous SNV	DDD4K.02396	DDD_2017	28135719	4293	0	exome	Developmental Delay (DD)	psychiatric disorder	validated	.	non-ssc	.	FGF12:NM_021032:exon3:c.G341A:p.R114H,FGF12:NM_004113:exon4:c.G155A:p.R52H	.	.	.	.	.	.	.	.	.	.	.	.	.	.	.	.	.	.	.	.	COSM3333423;COSM3781792	1(haematopoietic_and_lymphoid_tissue);1(pancreas);1(large_intestine)	Pathogenic|Pathogenic	not_provided|EPILEPTIC_ENCEPHALOPATHY\x2c_EARLY_INFANTILE\x2c_47	RCV000256469.1|RCV000258032.1	MedGen|MedGen:OMIM
151963	3q29	3	192635443	192635443	T	C	T>C	MB21D2	exonic	nonsynonymous SNV	DDD4K.03070	DDD_2017	28135719	4293	0	exome	Developmental Delay (DD)	psychiatric disorder	validated	.	non-ssc	.	MB21D2:NM_178496:exon1:c.A187G:p.K63E	.	.	.	.	.	.	.	.	.	.	.	.	.	.	.	.	.	.	.	.	.	.	.	.	.	.
7037	3q29	3	195798911	195798911	G	A	G>A	TFRC	exonic	nonsynonymous SNV	DDD4K.02327	DDD_2017	28135719	4293	0	exome	Developmental Delay (DD)	psychiatric disorder	validated	.	non-ssc	.	TFRC:NM_001313965:exon4:c.C304T:p.R102C,TFRC:NM_001128148:exon5:c.C547T:p.R183C,TFRC:NM_003234:exon5:c.C547T:p.R183C	.	.	.	.	.	.	.	.	.	.	.	.	.	.	.	.	.	.	.	rs867740041	.	.	.	.	.	.
205564	3q29	3	196626829	196626829	C	T	C>T	SENP5	exonic	nonsynonymous SNV	DDD4K.03309	DDD_2017	28135719	4293	0	exome	Developmental Delay (DD)	psychiatric disorder	validated	.	non-ssc	.	SENP5:NM_001308045:exon4:c.C1654T:p.R552W,SENP5:NM_152699:exon4:c.C1654T:p.R552W	.	.	.	.	.	.	2.48e-05	0	0	0	0.0002	3.01e-05	0	0	.	.	.	.	.	rs766269938	.	.	.	.	.	.
1487	4p16.3	4	1206816	1206816	G	A	G>A	CTBP1	exonic	nonsynonymous SNV	DDD4K.01563	DDD_2017	28135719	4293	0	exome	Developmental Delay (DD)	psychiatric disorder	validated	.	non-ssc	.	CTBP1:NM_001328:exon8:c.C1024T:p.R342W,CTBP1:NM_001012614:exon9:c.C991T:p.R331W	.	.	.	.	.	.	.	.	.	.	.	.	.	.	.	.	.	.	.	.	.	.	Pathogenic	not_provided	RCV000211044.2	MedGen
10296	4p16.3	4	1332953	1332953	T	G	T>G	MAEA	exonic	nonsynonymous SNV	DDD4K.02790	DDD_2017	28135719	4293	0	exome	Developmental Delay (DD)	psychiatric disorder	validated	.	non-ssc	.	MAEA:NM_001297431:exon7:c.T983G:p.M328R,MAEA:NM_001297430:exon8:c.T983G:p.M328R,MAEA:NM_005882:exon8:c.T1064G:p.M355R,MAEA:NM_001017405:exon9:c.T1187G:p.M396R,MAEA:NM_001297432:exon9:c.T1184G:p.M395R,MAEA:NM_001297433:exon9:c.T1043G:p.M348R	.	.	.	.	.	.	.	.	.	.	.	.	.	.	.	.	.	.	.	.	.	.	.	.	.	.
57732	4p16.3	4	2306773	2306773	C	T	C>T	ZFYVE28	exonic	nonsynonymous SNV	DDD4K.00105	DDD_2017	28135719	4293	0	exome	Developmental Delay (DD)	psychiatric disorder	validated	.	non-ssc	.	ZFYVE28:NM_001172656:exon7:c.G1204A:p.D402N,ZFYVE28:NM_001172659:exon8:c.G1084A:p.D362N,ZFYVE28:NM_020972:exon8:c.G1294A:p.D432N	0.0006	.	.	.	0.001	0.002	0.0002	0	0	0	0	1.61e-05	0	0.0011	.	.	.	.	.	rs564089384	COSM4124136	1(stomach)	.	.	.	.
132884	4p16.2	4	5586538	5586538	C	T	C>T	EVC2	exonic	nonsynonymous SNV	DDD4K.03607	DDD_2017	28135719	4293	0	exome	Developmental Delay (DD)	psychiatric disorder	validated	.	non-ssc	.	EVC2:NM_001166136:exon17:c.G2629A:p.E877K,EVC2:NM_147127:exon17:c.G2869A:p.E957K	.	.	.	.	.	.	.	.	.	.	.	.	.	.	.	.	.	.	.	.	.	.	.	.	.	.
645104	4p15.32	4	17528485	17528485	A	C	A>C	CLRN2	exonic	nonsynonymous SNV	DDD4K.00259	DDD_2017	28135719	4293	0	exome	Developmental Delay (DD)	psychiatric disorder	validated	.	non-ssc	.	CLRN2:NM_001079827:exon3:c.A479C:p.K160T	.	.	.	.	.	.	.	.	.	.	.	.	.	.	.	.	.	.	.	.	.	.	.	.	.	.
64151	4p15.31	4	17832725	17832725	G	A	G>A	NCAPG	exonic	nonsynonymous SNV	DDD4K.04115	DDD_2017	28135719	4293	0	exome	Developmental Delay (DD)	psychiatric disorder	validated	.	non-ssc	.	NCAPG:NM_022346:exon13:c.G1870A:p.V624I	.	.	.	.	.	.	4.13e-05	9.63e-05	0	0.0001	0	1.5e-05	0	0.0001	.	.	.	.	.	rs569951009	.	.	.	.	.	.
166647	4p15.2	4	22390766	22390766	C	T	C>T	ADGRA3	exonic	nonsynonymous SNV	DDD4K.00195	DDD_2017	28135719	4293	0	exome	Developmental Delay (DD)	psychiatric disorder	validated	.	non-ssc	.	ADGRA3:NM_145290:exon18:c.G2668A:p.G890S	.	.	.	.	.	.	4.12e-05	0	8.65e-05	0	0	0	0	0.0002	.	.	.	.	.	rs753239712	.	.	.	.	.	.
55300	4p15.2	4	25253982	25253982	A	T	A>T	PI4K2B	exonic	nonsynonymous SNV	DDD4K.02724	DDD_2017	28135719	4293	0	exome	Developmental Delay (DD)	psychiatric disorder	validated	.	non-ssc	.	PI4K2B:NM_018323:exon2:c.A308T:p.D103V	.	.	.	.	.	.	.	.	.	.	.	.	.	.	.	.	.	.	.	.	.	.	.	.	.	.
57728	4p14	4	39217583	39217583	G	T	G>T	WDR19	exonic	nonsynonymous SNV	DDD4K.01301	DDD_2017	28135719	4293	0	exome	Developmental Delay (DD)	psychiatric disorder	validated	.	non-ssc	.	WDR19:NM_001317924:exon10:c.G604T:p.A202S,WDR19:NM_025132:exon11:c.G1084T:p.A362S	.	.	.	.	.	.	.	.	.	.	.	.	.	.	.	.	.	.	.	.	.	.	.	.	.	.
57728	4p14	4	39269711	39269711	G	C	G>C	WDR19	exonic	nonsynonymous SNV	DDD4K.00973	DDD_2017	28135719	4293	0	exome	Developmental Delay (DD)	psychiatric disorder	validated	.	non-ssc	.	WDR19:NM_001317924:exon29:c.G2878C:p.G960R,WDR19:NM_025132:exon30:c.G3358C:p.G1120R	.	.	.	.	.	.	.	.	.	.	.	.	.	.	.	.	.	.	.	.	.	.	.	.	.	.
152831	4p14	4	39448022	39448022	G	C	G>C	KLB	exonic	nonsynonymous SNV	DDD4K.00344	DDD_2017	28135719	4293	0	exome	Developmental Delay (DD)	psychiatric disorder	validated	.	non-ssc	.	KLB:NM_175737:exon4:c.G1676C:p.R559T	.	.	.	.	.	.	.	.	.	.	.	.	.	.	.	.	.	.	.	.	.	.	.	.	.	.
11019	4p14	4	39466706	39466706	C	G	C>G	LIAS	exonic	nonsynonymous SNV	DDD4K.00994	DDD_2017	28135719	4293	0	exome	Developmental Delay (DD)	psychiatric disorder	validated	.	non-ssc	.	LIAS:NM_001278590:exon5:c.C434G:p.S145C,LIAS:NM_006859:exon5:c.C434G:p.S145C,LIAS:NM_194451:exon5:c.C434G:p.S145C	.	.	.	.	.	.	.	.	.	.	.	.	.	.	.	.	.	.	.	.	.	.	.	.	.	.
54502	4p14	4	40438616	40438616	G	C	G>C	RBM47	exonic	nonsynonymous SNV	DDD4K.02036	DDD_2017	28135719	4293	0	exome	Developmental Delay (DD)	psychiatric disorder	validated	.	non-ssc	.	RBM47:NM_001098634:exon5:c.C1172G:p.P391R	.	.	.	.	.	.	.	.	.	.	.	.	.	.	.	.	.	.	.	.	.	.	.	.	.	.
54502	4p14	4	40440024	40440024	T	C	T>C	RBM47	exonic	nonsynonymous SNV	DDD4K.00283	DDD_2017	28135719	4293	0	exome	Developmental Delay (DD)	psychiatric disorder	validated	.	non-ssc	.	RBM47:NM_019027:exon3:c.A887G:p.H296R,RBM47:NM_001098634:exon4:c.A887G:p.H296R	.	.	.	.	.	.	8.29e-06	0	0	0	0	1.51e-05	0	0	.	.	.	.	.	rs775615795	.	.	.	.	.	.
10396	4p13	4	42487633	42487633	C	T	C>T	ATP8A1	exonic	nonsynonymous SNV	DDD4K.03013	DDD_2017	28135719	4293	0	exome	Developmental Delay (DD)	psychiatric disorder	validated	.	non-ssc	.	ATP8A1:NM_001105529:exon24:c.G2159A:p.R720Q,ATP8A1:NM_006095:exon25:c.G2204A:p.R735Q	.	.	.	.	.	.	4.13e-05	0	0	0	0	7.51e-05	0	0	0.0003	.	0.0005	.	.	rs146595907	.	.	.	.	.	.
152579	4q12	4	54011583	54011583	T	A	T>A	SCFD2	exonic	nonsynonymous SNV	DDD4K.01527	DDD_2017	28135719	4293	0	exome	Developmental Delay (DD)	psychiatric disorder	validated	.	non-ssc	.	SCFD2:NM_152540:exon5:c.A1478T:p.E493V	.	.	.	.	.	.	.	.	.	.	.	.	.	.	.	.	.	.	.	.	.	.	.	.	.	.
57482	4q12	4	57182337	57182337	G	C	G>C	KIAA1211	exonic	nonsynonymous SNV	DDD4K.03753	DDD_2017	28135719	4293	0	exome	Developmental Delay (DD)	psychiatric disorder	validated	.	non-ssc	.	KIAA1211:NM_020722:exon8:c.G2669C:p.R890P	.	.	.	.	.	.	.	.	.	.	.	.	.	.	.	.	.	.	.	.	.	.	.	.	.	.
91746	4q13.2	4	69184264	69184264	C	T	C>T	YTHDC1	exonic	nonsynonymous SNV	DDD4K.01300	DDD_2017	28135719	4293	0	exome	Developmental Delay (DD)	psychiatric disorder	validated	.	non-ssc	.	YTHDC1:NM_133370:exon14:c.G1743A:p.M581I,YTHDC1:NM_001031732:exon15:c.G1797A:p.M599I,YTHDC1:NM_001330698:exon15:c.G1821A:p.M607I	.	.	.	.	.	.	.	.	.	.	.	.	.	.	.	.	.	.	.	.	.	.	.	.	.	.
26057	4q13.3	4	73964004	73964004	A	G	A>G	ANKRD17	exonic	nonsynonymous SNV	DDD4K.03087	DDD_2017	28135719	4293	0	exome	Developmental Delay (DD)	psychiatric disorder	validated	.	non-ssc	.	ANKRD17:NM_198889:exon25:c.T4054C:p.S1352P,ANKRD17:NM_001286771:exon26:c.T4468C:p.S1490P,ANKRD17:NM_015574:exon26:c.T4804C:p.S1602P,ANKRD17:NM_032217:exon26:c.T4807C:p.S1603P	.	.	.	.	.	.	.	.	.	.	.	.	.	.	.	.	.	.	.	.	.	.	.	.	.	.
26057	4q13.3	4	74014541	74014541	A	G	A>G	ANKRD17	exonic	nonsynonymous SNV	DDD4K.02452	DDD_2017	28135719	4293	0	exome	Developmental Delay (DD)	psychiatric disorder	validated	.	non-ssc	.	ANKRD17:NM_001286771:exon8:c.T1217C:p.L406P,ANKRD17:NM_015574:exon8:c.T1556C:p.L519P,ANKRD17:NM_032217:exon8:c.T1556C:p.L519P,ANKRD17:NM_198889:exon8:c.T1556C:p.L519P	.	.	.	.	.	.	.	.	.	.	.	.	.	.	.	.	.	.	.	.	.	.	.	.	.	.
9908	4q21.1	4	76570841	76570841	T	C	T>C	G3BP2	exonic	nonsynonymous SNV	DDD4K.01415	DDD_2017	28135719	4293	0	exome	Developmental Delay (DD)	psychiatric disorder	validated	.	non-ssc	.	G3BP2:NM_203504:exon11:c.A1123G:p.K375E,G3BP2:NM_012297:exon12:c.A1222G:p.K408E,G3BP2:NM_203505:exon12:c.A1222G:p.K408E	.	.	.	.	.	.	.	.	.	.	.	.	.	.	.	.	.	.	.	.	.	.	.	.	.	.
100129583;100631383	4q21.1	4	77184893	77184893	C	T	C>T	FAM47E;FAM47E-STBD1	exonic	nonsynonymous SNV	DDD4K.02494	DDD_2017	28135719	4293	0	exome	Developmental Delay (DD)	psychiatric disorder	validated	.	non-ssc	.	FAM47E:NM_001136570:exon3:c.C457T:p.R153W,FAM47E:NM_001242936:exon3:c.C118T:p.R40W,FAM47E-STBD1:NM_001242939:exon3:c.C457T:p.R153W	.	.	.	.	.	.	.	.	.	.	.	.	.	.	.	.	.	.	.	.	.	.	.	.	.	.
2250	4q21.21	4	81207512	81207512	C	G	C>G	FGF5	exonic	nonsynonymous SNV	DDD4K.03330	DDD_2017	28135719	4293	0	exome	Developmental Delay (DD)	psychiatric disorder	validated	.	non-ssc	.	FGF5:NM_001291812:exon3:c.C64G:p.R22G,FGF5:NM_004464:exon3:c.C493G:p.R165G	.	.	.	.	.	.	.	.	.	.	.	.	.	.	.	.	.	.	.	.	.	.	.	.	.	.
9429	4q22.1	4	89061095	89061095	T	C	T>C	ABCG2	exonic	nonsynonymous SNV	DDD4K.01359	DDD_2017	28135719	4293	0	exome	Developmental Delay (DD)	psychiatric disorder	validated	.	non-ssc	.	ABCG2:NM_001257386:exon2:c.A53G:p.N18S,ABCG2:NM_001348986:exon2:c.A53G:p.N18S,ABCG2:NM_001348987:exon2:c.A53G:p.N18S,ABCG2:NM_001348989:exon2:c.A53G:p.N18S,ABCG2:NM_004827:exon2:c.A53G:p.N18S,ABCG2:NM_001348985:exon3:c.A53G:p.N18S,ABCG2:NM_001348988:exon3:c.A53G:p.N18S	.	.	.	.	.	.	.	.	.	.	.	.	.	.	.	.	.	.	.	.	.	.	.	.	.	.
51176	4q25	4	109088835	109088835	C	T	C>T	LEF1	exonic	nonsynonymous SNV	DDD4K.02875	DDD_2017	28135719	4293	0	exome	Developmental Delay (DD)	psychiatric disorder	validated	.	non-ssc	.	LEF1:NM_001130713:exon1:c.G89A:p.G30D,LEF1:NM_001130714:exon1:c.G89A:p.G30D,LEF1:NM_016269:exon1:c.G89A:p.G30D	.	.	.	.	.	.	.	.	.	.	.	.	.	.	.	.	.	.	.	.	.	.	.	.	.	.
5308	4q25	4	111542367	111542367	G	C	G>C	PITX2	exonic	nonsynonymous SNV	DDD4K.01826	DDD_2017	28135719	4293	0	exome	Developmental Delay (DD)	psychiatric disorder	validated	.	non-ssc	.	PITX2:NM_000325:exon2:c.C364G:p.R122G,PITX2:NM_001204399:exon3:c.C205G:p.R69G,PITX2:NM_001204398:exon4:c.C343G:p.R115G,PITX2:NM_153427:exon4:c.C205G:p.R69G,PITX2:NM_153426:exon5:c.C343G:p.R115G,PITX2:NM_001204397:exon6:c.C343G:p.R115G	.	.	.	.	.	.	.	.	.	.	.	.	.	.	.	.	.	.	.	.	.	.	.	.	.	.
51574	4q25	4	113568705	113568705	G	T	G>T	LARP7	exonic	nonsynonymous SNV	DDD4K.03399	DDD_2017	28135719	4293	0	exome	Developmental Delay (DD)	psychiatric disorder	validated	.	non-ssc	.	LARP7:NM_015454:exon7:c.G997T:p.D333Y,LARP7:NM_016648:exon7:c.G997T:p.D333Y,LARP7:NM_001267039:exon9:c.G1018T:p.D340Y	.	.	.	.	.	.	.	.	.	.	.	.	.	.	.	.	.	.	.	.	.	.	.	.	.	.
287	4q26	4	114254305	114254305	A	G	A>G	ANK2	exonic	nonsynonymous SNV	DDD4K.04291	DDD_2017	28135719	4293	0	exome	Developmental Delay (DD)	psychiatric disorder	validated	.	non-ssc	.	ANK2:NM_001148:exon29:c.A3320G:p.E1107G,ANK2:NM_020977:exon29:c.A3320G:p.E1107G,ANK2:NM_001127493:exon31:c.A3293G:p.E1098G	.	.	.	.	.	.	.	.	.	.	.	.	.	.	.	.	.	.	.	.	.	.	.	.	.	.
84162	4q27	4	123171679	123171679	G	A	G>A	KIAA1109	exonic	nonsynonymous SNV	DDD4K.01569	DDD_2017	28135719	4293	0	exome	Developmental Delay (DD)	psychiatric disorder	validated	.	non-ssc	.	KIAA1109:NM_015312:exon35:c.G5873A:p.R1958Q	.	.	.	.	.	.	.	.	.	.	.	.	.	.	.	.	.	.	.	.	COSM4121786;COSM294494	2(stomach);1(large_intestine)	.	.	.	.
57182	4q28.1	4	125591766	125591766	T	C	T>C	ANKRD50	exonic	nonsynonymous SNV	DDD4K.00184	DDD_2017	28135719	4293	0	exome	Developmental Delay (DD)	psychiatric disorder	validated	.	non-ssc	.	ANKRD50:NM_001167882:exon3:c.A2129G:p.Q710R,ANKRD50:NM_020337:exon4:c.A2666G:p.Q889R	.	.	.	.	.	.	.	.	.	.	.	.	.	.	.	.	.	.	.	.	.	.	.	.	.	.
57575	4q28.3	4	134073108	134073108	G	A	G>A	PCDH10	exonic	nonsynonymous SNV	DDD4K.01429	DDD_2017	28135719	4293	0	exome	Developmental Delay (DD)	psychiatric disorder	validated	.	non-ssc	.	PCDH10:NM_020815:exon1:c.G1813A:p.A605T,PCDH10:NM_032961:exon1:c.G1813A:p.A605T	.	.	.	.	.	.	.	.	.	.	.	.	.	.	.	.	.	.	.	.	COSM4122299	1(stomach)	.	.	.	.
152503	4q31.3	4	152048808	152048808	C	A	C>A	SH3D19	exonic	nonsynonymous SNV	DDD4K.03060	DDD_2017	28135719	4293	0	exome	Developmental Delay (DD)	psychiatric disorder	validated	.	non-ssc	.	SH3D19:NM_001128924:exon12:c.G2041T:p.D681Y,SH3D19:NM_001128923:exon19:c.G2149T:p.D717Y,SH3D19:NM_001243349:exon19:c.G2149T:p.D717Y,SH3D19:NM_001009555:exon20:c.G2218T:p.D740Y	.	.	.	.	.	.	.	.	.	.	.	.	.	.	.	.	.	.	.	.	.	.	.	.	.	.
152503	4q31.3	4	152095906	152095906	C	T	C>T	SH3D19	exonic	nonsynonymous SNV	DDD4K.02038	DDD_2017	28135719	4293	0	exome	Developmental Delay (DD)	psychiatric disorder	validated	.	non-ssc	.	SH3D19:NM_001128924:exon1:c.G610A:p.D204N,SH3D19:NM_001009555:exon7:c.G610A:p.D204N,SH3D19:NM_001128923:exon7:c.G610A:p.D204N,SH3D19:NM_001243349:exon7:c.G610A:p.D204N	.	.	.	.	.	.	9.05e-06	0	8.71e-05	0	0	0	0	0	.	.	.	.	.	rs759991712	COSM3127740	1(skin)	.	.	.	.
201799	4q31.3	4	153574055	153574055	G	A	G>A	TMEM154	exonic	nonsynonymous SNV	DDD4K.00121	DDD_2017	28135719	4293	0	exome	Developmental Delay (DD)	psychiatric disorder	validated	.	non-ssc	.	TMEM154:NM_152680:exon2:c.C89T:p.S30L	.	.	.	.	.	.	.	.	.	.	.	.	.	.	.	.	.	.	.	.	.	.	.	.	.	.
54798	4q31.3	4	155158018	155158018	T	C	T>C	DCHS2	exonic	nonsynonymous SNV	DDD4K.01688	DDD_2017	28135719	4293	0	exome	Developmental Delay (DD)	psychiatric disorder	validated	.	non-ssc	.	DCHS2:NM_017639:exon25:c.A6421G:p.N2141D	.	.	.	.	.	.	.	.	.	.	.	.	.	.	.	.	.	.	.	.	.	.	.	.	.	.
55601	4q32.3	4	169146715	169146715	A	C	A>C	DDX60	exonic	nonsynonymous SNV	DDD4K.01276	DDD_2017	28135719	4293	0	exome	Developmental Delay (DD)	psychiatric disorder	validated	.	non-ssc	.	DDX60:NM_017631:exon34:c.T4646G:p.M1549R	.	.	.	.	.	.	.	.	.	.	.	.	.	.	.	.	.	.	.	.	.	.	.	.	.	.
55601	4q32.3	4	169167746	169167746	T	A	T>A	DDX60	exonic	nonsynonymous SNV	DDD4K.01111	DDD_2017	28135719	4293	0	exome	Developmental Delay (DD)	psychiatric disorder	validated	.	non-ssc	.	DDX60:NM_017631:exon30:c.A3987T:p.R1329S	.	.	.	.	.	.	.	.	.	.	.	.	.	.	.	.	.	.	.	.	.	.	.	.	.	.
91351	4q32.3	4	169374390	169374390	C	A	C>A	DDX60L	exonic	nonsynonymous SNV	DDD4K.02405	DDD_2017	28135719	4293	0	exome	Developmental Delay (DD)	psychiatric disorder	validated	.	non-ssc	.	DDX60L:NM_001012967:exon8:c.G881T:p.C294F,DDX60L:NM_001291510:exon8:c.G881T:p.C294F,DDX60L:NM_001345927:exon8:c.G881T:p.C294F	.	.	.	.	.	.	.	.	.	.	.	.	.	.	.	.	.	.	.	.	.	.	.	.	.	.
6550	5p15.33	5	480046	480046	C	G	C>G	SLC9A3	exonic	nonsynonymous SNV	DDD4K.03640	DDD_2017	28135719	4293	0	exome	Developmental Delay (DD)	psychiatric disorder	validated	.	non-ssc	.	SLC9A3:NM_001284351:exon10:c.G1525C:p.V509L,SLC9A3:NM_004174:exon10:c.G1552C:p.V518L	.	.	.	.	.	.	.	.	.	.	.	.	.	.	.	.	.	.	.	.	.	.	.	.	.	.
7015	5p15.33	5	1266634	1266634	C	T	C>T	TERT	exonic	nonsynonymous SNV	DDD4K.03380	DDD_2017	28135719	4293	0	exome	Developmental Delay (DD)	psychiatric disorder	validated	.	non-ssc	.	TERT:NM_001193376:exon10:c.G2599A:p.V867M,TERT:NM_198253:exon10:c.G2599A:p.V867M	.	.	.	.	.	.	.	.	.	.	.	.	.	.	.	.	.	.	.	rs201159197	.	.	Pathogenic	Pulmonary_fibrosis_and/or_bone_marrow_failure\x2c_telomere-related\x2c_1	RCV000030627.24	MedGen:OMIM
108	5p15.31	5	7709415	7709415	T	C	T>C	ADCY2	exonic	nonsynonymous SNV	DDD4K.01025	DDD_2017	28135719	4293	0	exome	Developmental Delay (DD)	psychiatric disorder	validated	.	non-ssc	.	ADCY2:NM_020546:exon10:c.T1493C:p.L498S	.	.	.	.	.	.	.	.	.	.	.	.	.	.	.	.	.	.	.	.	.	.	.	.	.	.
7204	5p15.2	5	14397221	14397221	C	A	C>A	TRIO	exonic	nonsynonymous SNV	DDD4K.00032	DDD_2017	28135719	4293	0	exome	Developmental Delay (DD)	psychiatric disorder	validated	.	non-ssc	.	TRIO:NM_007118:exon29:c.C4381A:p.P1461T	.	.	.	.	.	.	.	.	.	.	.	.	.	.	.	.	.	.	.	.	.	.	Pathogenic	Mercer-Ba_syndrome	RCV000239509.2	MedGen:OMIM
7204	5p15.2	5	14397222	14397222	C	T	C>T	TRIO	exonic	nonsynonymous SNV	DDD4K.02582	DDD_2017	28135719	4293	0	exome	Developmental Delay (DD)	psychiatric disorder	validated	.	non-ssc	.	TRIO:NM_007118:exon29:c.C4382T:p.P1461L	.	.	.	.	.	.	.	.	.	.	.	.	.	.	.	.	.	.	.	.	.	.	.	.	.	.
133688	5p13.2	5	35957496	35957496	A	C	A>C	UGT3A1	exonic	nonsynonymous SNV	DDD4K.03840	DDD_2017	28135719	4293	0	exome	Developmental Delay (DD)	psychiatric disorder	validated	.	non-ssc	.	UGT3A1:NM_152404:exon5:c.T869G:p.F290C	.	.	.	.	.	.	.	.	.	.	.	.	.	.	.	.	.	.	.	.	.	.	.	.	.	.
25836	5p13.2	5	36972065	36972065	A	G	A>G	NIPBL	exonic	nonsynonymous SNV	DDD4K.00632	DDD_2017	28135719	4293	0	exome	Developmental Delay (DD)	psychiatric disorder	validated	.	non-ssc	.	NIPBL:NM_015384:exon8:c.A790G:p.M264V,NIPBL:NM_133433:exon8:c.A790G:p.M264V	.	.	.	.	.	.	4.18e-05	0	0	0	0	3.03e-05	0	0.0002	.	.	.	.	.	rs781159621	COSM1159417;COSM1159418	2(pancreas)	.	.	.	.
25836	5p13.2	5	37017185	37017185	G	C	G>C	NIPBL	exonic	nonsynonymous SNV	DDD4K.00637	DDD_2017	28135719	4293	0	exome	Developmental Delay (DD)	psychiatric disorder	validated	.	non-ssc	.	NIPBL:NM_015384:exon24:c.G4841C:p.G1614A,NIPBL:NM_133433:exon24:c.G4841C:p.G1614A	.	.	.	.	.	.	.	.	.	.	.	.	.	.	.	.	.	.	.	.	.	.	.	.	.	.
2690	5p12	5	42719180	42719180	G	T	G>T	GHR	exonic	nonsynonymous SNV	DDD4K.03010	DDD_2017	28135719	4293	0	exome	Developmental Delay (DD)	psychiatric disorder	validated	.	non-ssc	.	GHR:NM_001242460:exon8:c.G1505T:p.C502F,GHR:NM_001242406:exon9:c.G1571T:p.C524F,GHR:NM_000163:exon10:c.G1571T:p.C524F,GHR:NM_001242399:exon10:c.G1592T:p.C531F,GHR:NM_001242402:exon10:c.G1571T:p.C524F,GHR:NM_001242403:exon10:c.G1571T:p.C524F,GHR:NM_001242404:exon10:c.G1571T:p.C524F,GHR:NM_001242405:exon10:c.G1571T:p.C524F,GHR:NM_001242400:exon11:c.G1571T:p.C524F,GHR:NM_001242401:exon11:c.G1571T:p.…	.	.	.	.	.	.	.	.	.	.	.	.	.	.	.	.	.	.	.	.	.	.	.	.	.	.
348980	5p12	5	45462046	45462046	T	G	T>G	HCN1	exonic	nonsynonymous SNV	DDD4K.02506	DDD_2017	28135719	4293	0	exome	Developmental Delay (DD)	psychiatric disorder	validated	.	non-ssc	.	HCN1:NM_021072:exon3:c.A913C:p.M305L	.	.	.	.	.	.	.	.	.	.	.	.	.	.	.	.	.	.	.	.	.	.	.	.	.	.
8988	5q11.2	5	53751804	53751804	C	T	C>T	HSPB3	exonic	nonsynonymous SNV	DDD4K.00038	DDD_2017	28135719	4293	0	exome	Developmental Delay (DD)	psychiatric disorder	validated	.	non-ssc	.	HSPB3:NM_006308:exon1:c.C185T:p.T62M	0.0002	.	.	0.001	.	.	1.65e-05	9.62e-05	0	0.0001	0	0	0	0	0.0001	0.0002	.	.	.	rs201011378	.	.	.	.	.	.
54557	5q12.3	5	64976535	64976535	T	C	T>C	SGTB	exonic	nonsynonymous SNV	DDD4K.03410	DDD_2017	28135719	4293	0	exome	Developmental Delay (DD)	psychiatric disorder	validated	.	non-ssc	.	SGTB:NM_019072:exon7:c.A566G:p.Y189C	.	.	.	.	.	.	.	.	.	.	.	.	.	.	.	.	.	.	.	.	.	.	.	.	.	.
10087	5q13.3	5	74722257	74722257	G	A	G>A	COL4A3BP	exonic	nonsynonymous SNV	DDD4K.02494	DDD_2017	28135719	4293	0	exome	Developmental Delay (DD)	psychiatric disorder	validated	.	non-ssc	.	COL4A3BP:NM_005713:exon4:c.C395T:p.S132L,COL4A3BP:NM_031361:exon4:c.C395T:p.S132L,COL4A3BP:NM_001130105:exon5:c.C779T:p.S260L	.	.	.	.	.	.	.	.	.	.	.	.	.	.	.	.	.	.	.	.	.	.	.	.	.	.
10087	5q13.3	5	74722257	74722257	G	A	G>A	COL4A3BP	exonic	nonsynonymous SNV	DDD4K.03002	DDD_2017	28135719	4293	0	exome	Developmental Delay (DD)	psychiatric disorder	validated	.	non-ssc	.	COL4A3BP:NM_005713:exon4:c.C395T:p.S132L,COL4A3BP:NM_031361:exon4:c.C395T:p.S132L,COL4A3BP:NM_001130105:exon5:c.C779T:p.S260L	.	.	.	.	.	.	.	.	.	.	.	.	.	.	.	.	.	.	.	.	.	.	.	.	.	.
10087	5q13.3	5	74722257	74722257	G	A	G>A	COL4A3BP	exonic	nonsynonymous SNV	DDD4K.01346	DDD_2017	28135719	4293	0	exome	Developmental Delay (DD)	psychiatric disorder	validated	.	non-ssc	.	COL4A3BP:NM_005713:exon4:c.C395T:p.S132L,COL4A3BP:NM_031361:exon4:c.C395T:p.S132L,COL4A3BP:NM_001130105:exon5:c.C779T:p.S260L	.	.	.	.	.	.	.	.	.	.	.	.	.	.	.	.	.	.	.	.	.	.	.	.	.	.
9456	5q14.1	5	78697772	78697772	T	C	T>C	HOMER1	exonic	nonsynonymous SNV	DDD4K.01474	DDD_2017	28135719	4293	0	exome	Developmental Delay (DD)	psychiatric disorder	validated	.	non-ssc	.	HOMER1:NM_004272:exon6:c.A634G:p.K212E	.	.	.	.	.	.	.	.	.	.	.	.	.	.	.	.	.	.	.	.	.	.	.	.	.	.
84059	5q14.3	5	90368385	90368385	T	C	T>C	ADGRV1	exonic	nonsynonymous SNV	DDD4K.02209	DDD_2017	28135719	4293	0	exome	Developmental Delay (DD)	psychiatric disorder	validated	.	non-ssc	.	ADGRV1:NM_032119:exon86:c.T18274C:p.Y6092H	.	.	.	.	.	.	.	.	.	.	.	.	.	.	.	.	.	.	.	.	.	.	.	.	.	.
7025	5q15	5	92921036	92921036	T	C	T>C	NR2F1	exonic	nonsynonymous SNV	DDD4K.00436	DDD_2017	28135719	4293	0	exome	Developmental Delay (DD)	psychiatric disorder	validated	.	non-ssc	.	NR2F1:NM_005654:exon1:c.T307C:p.C103R	.	.	.	.	.	.	.	.	.	.	.	.	.	.	.	.	.	.	.	.	.	.	.	.	.	.
9652	5q15	5	94882809	94882809	C	A	C>A	TTC37	exonic	nonsynonymous SNV	DDD4K.03899	DDD_2017	28135719	4293	0	exome	Developmental Delay (DD)	psychiatric disorder	validated	.	non-ssc	.	TTC37:NM_014639:exon4:c.G46T:p.A16S	.	.	.	.	.	.	.	.	.	.	.	.	.	.	.	.	.	.	.	.	.	.	.	.	.	.
642987	5q22.1	5	109904255	109904255	C	T	C>T	TMEM232	exonic	nonsynonymous SNV	DDD4K.01685	DDD_2017	28135719	4293	0	exome	Developmental Delay (DD)	psychiatric disorder	validated	.	non-ssc	.	TMEM232:NM_001039763:exon11:c.G1348A:p.G450R	.	.	.	.	.	.	4.54e-05	0	0	0	0	0	0	0.0001	.	.	.	.	.	rs770513886	.	.	.	.	.	.
5813	5q31.2	5	139494382	139494382	A	T	A>T	PURA	exonic	nonsynonymous SNV	DDD4K.01614	DDD_2017	28135719	4293	0	exome	Developmental Delay (DD)	psychiatric disorder	validated	.	non-ssc	.	PURA:NM_005859:exon1:c.A616T:p.I206F	.	.	.	.	.	.	.	.	.	.	.	.	.	.	.	.	.	.	.	rs786204834	.	.	Pathogenic	Mental_retardation\x2c_autosomal_dominant_31	RCV000169738.4	MedGen:OMIM
26025	5q31.3	5	140811930	140811930	G	A	G>A	PCDHGA12	exonic	nonsynonymous SNV	DDD4K.00821	DDD_2017	28135719	4293	0	exome	Developmental Delay (DD)	psychiatric disorder	validated	.	non-ssc	.	PCDHGA12:NM_003735:exon1:c.G1604A:p.R535Q,PCDHGA12:NM_032094:exon1:c.G1604A:p.R535Q	.	.	.	.	.	.	.	.	.	.	.	.	.	.	.	.	.	.	.	.	.	.	.	.	.	.
51520	5q32	5	145509661	145509661	G	A	G>A	LARS	exonic	nonsynonymous SNV	DDD4K.03527	DDD_2017	28135719	4293	0	exome	Developmental Delay (DD)	psychiatric disorder	validated	.	non-ssc	.	LARS:NM_001317964:exon24:c.C2410T:p.R804W,LARS:NM_001317965:exon24:c.C2386T:p.R796W,LARS:NM_016460:exon24:c.C2467T:p.R823W,LARS:NM_020117:exon25:c.C2548T:p.R850W	.	.	.	.	.	.	4.13e-05	0	0	0	0	7.5e-05	0	0	0.0002	.	0.0003	.	.	rs144153578	.	.	.	.	.	.
815	5q32	5	149633109	149633109	G	C	G>C	CAMK2A	exonic	nonsynonymous SNV	DDD4K.01685	DDD_2017	28135719	4293	0	exome	Developmental Delay (DD)	psychiatric disorder	validated	.	non-ssc	.	CAMK2A:NM_015981:exon7:c.C412G:p.P138A,CAMK2A:NM_171825:exon7:c.C412G:p.P138A	.	.	.	.	.	.	.	.	.	.	.	.	.	.	.	.	.	.	.	.	.	.	.	.	.	.
815	5q32	5	149636340	149636340	C	G	C>G	CAMK2A	exonic	nonsynonymous SNV	DDD4K.02453	DDD_2017	28135719	4293	0	exome	Developmental Delay (DD)	psychiatric disorder	validated	.	non-ssc	.	CAMK2A:NM_015981:exon5:c.G327C:p.E109D,CAMK2A:NM_171825:exon5:c.G327C:p.E109D	.	.	.	.	.	.	.	.	.	.	.	.	.	.	.	.	.	.	.	.	.	.	.	.	.	.
6678	5q33.1	5	151043746	151043746	A	G	A>G	SPARC	exonic	nonsynonymous SNV	DDD4K.01972	DDD_2017	28135719	4293	0	exome	Developmental Delay (DD)	psychiatric disorder	validated	.	non-ssc	.	SPARC:NM_001309443:exon9:c.T782C:p.M261T,SPARC:NM_001309444:exon9:c.T785C:p.M262T,SPARC:NM_003118:exon9:c.T785C:p.M262T	.	.	.	.	.	.	.	.	.	.	.	.	.	.	.	.	.	.	.	.	.	.	.	.	.	.
9337	5q33.2	5	154242929	154242929	G	A	G>A	CNOT8	exonic	nonsynonymous SNV	DDD4K.00029	DDD_2017	28135719	4293	0	exome	Developmental Delay (DD)	psychiatric disorder	validated	.	non-ssc	.	CNOT8:NM_001301073:exon2:c.G91A:p.V31M,CNOT8:NM_001301074:exon2:c.G91A:p.V31M,CNOT8:NM_004779:exon2:c.G91A:p.V31M	.	.	.	.	.	.	8.24e-06	0	0	0	0	1.5e-05	0	0	0.0001	.	0.0001	.	.	rs373638470	.	.	.	.	.	.
153830	5q33.3	5	158621832	158621832	C	A	C>A	RNF145	exonic	nonsynonymous SNV	DDD4K.03319	DDD_2017	28135719	4293	0	exome	Developmental Delay (DD)	psychiatric disorder	validated	.	non-ssc	.	RNF145:NM_001199380:exon3:c.G275T:p.G92V,RNF145:NM_001199381:exon3:c.G236T:p.G79V,RNF145:NM_001199382:exon3:c.G227T:p.G76V,RNF145:NM_001199383:exon3:c.G185T:p.G62V,RNF145:NM_144726:exon3:c.G269T:p.G90V	.	.	.	.	.	.	.	.	.	.	.	.	.	.	.	.	.	.	.	.	.	.	.	.	.	.
23120	5q34	5	160031015	160031015	G	A	G>A	ATP10B	exonic	nonsynonymous SNV	DDD4K.02875	DDD_2017	28135719	4293	0	exome	Developmental Delay (DD)	psychiatric disorder	validated	.	non-ssc	.	ATP10B:NM_025153:exon20:c.C3194T:p.A1065V	.	.	.	.	.	.	.	.	.	.	.	.	.	.	.	.	.	.	.	.	.	.	.	.	.	.
23120	5q34	5	160071147	160071147	G	T	G>T	ATP10B	exonic	nonsynonymous SNV	DDD4K.00625	DDD_2017	28135719	4293	0	exome	Developmental Delay (DD)	psychiatric disorder	validated	.	non-ssc	.	ATP10B:NM_025153:exon9:c.C866A:p.A289E	.	.	.	.	.	.	.	.	.	.	.	.	.	.	.	.	.	.	.	.	.	.	.	.	.	.
2561	5q34	5	160761761	160761761	A	G	A>G	GABRB2	exonic	nonsynonymous SNV	DDD4K.03101	DDD_2017	28135719	4293	0	exome	Developmental Delay (DD)	psychiatric disorder	validated	.	non-ssc	.	GABRB2:NM_000813:exon8:c.T830C:p.L277S,GABRB2:NM_021911:exon8:c.T830C:p.L277S	.	.	.	.	.	.	.	.	.	.	.	.	.	.	.	.	.	.	.	.	.	.	.	.	.	.
23286	5q34	5	167891774	167891774	G	A	G>A	WWC1	exonic	nonsynonymous SNV	DDD4K.01518	DDD_2017	28135719	4293	0	exome	Developmental Delay (DD)	psychiatric disorder	validated	.	non-ssc	.	WWC1:NM_001161661:exon21:c.G2975A:p.R992H,WWC1:NM_001161662:exon21:c.G2975A:p.R992H,WWC1:NM_015238:exon21:c.G2957A:p.R986H	.	.	.	.	.	.	1.65e-05	0	0	0.0001	0	0	0	6.06e-05	.	.	.	.	.	rs777482969	COSM1065625	1(endometrium)	.	.	.	.
8817	5q35.1	5	170883661	170883661	C	T	C>T	FGF18	exonic	nonsynonymous SNV	DDD4K.01237	DDD_2017	28135719	4293	0	exome	Developmental Delay (DD)	psychiatric disorder	validated	.	non-ssc	.	FGF18:NM_003862:exon5:c.C476T:p.P159L	.	.	.	.	.	.	.	.	.	.	.	.	.	.	.	.	.	.	.	.	.	.	.	.	.	.
64324	5q35.3	5	176720974	176720974	G	A	G>A	NSD1	exonic	nonsynonymous SNV	DDD4K.02982	DDD_2017	28135719	4293	0	exome	Developmental Delay (DD)	psychiatric disorder	validated	.	non-ssc	.	NSD1:NM_022455:exon23:c.G6605A:p.C2202Y,NSD1:NM_172349:exon24:c.G5798A:p.C1933Y	.	.	.	.	.	.	.	.	.	.	.	.	.	.	.	.	.	.	.	rs121908071	.	.	Pathogenic	Sotos_syndrome_1	RCV000004362.3	MedGen:OMIM
79908	5q35.3	5	180377102	180377102	G	A	G>A	BTNL8	exonic	nonsynonymous SNV	DDD4K.00613	DDD_2017	28135719	4293	0	exome	Developmental Delay (DD)	psychiatric disorder	validated	.	non-ssc	.	BTNL8:NM_001159707:exon7:c.G713A:p.R238H,BTNL8:NM_001159710:exon7:c.G509A:p.R170H,BTNL8:NM_001040462:exon8:c.G1061A:p.R354H,BTNL8:NM_001159709:exon8:c.G686A:p.R229H	0.0006	0.0023	.	.	.	.	0.0003	0.0021	9.6e-05	0	0	0.0002	0	0	0.0012	0.0028	0.0004	.	.	rs141157357	.	.	.	.	.	.
55770	6p25.3	6	556490	556490	C	G	C>G	EXOC2	exonic	nonsynonymous SNV	DDD4K.02846	DDD_2017	28135719	4293	0	exome	Developmental Delay (DD)	psychiatric disorder	validated	.	non-ssc	.	EXOC2:NM_018303:exon18:c.G1926C:p.E642D	.	.	.	.	.	.	.	.	.	.	.	.	.	.	.	.	.	.	.	.	.	.	.	.	.	.
389362	6p25.2	6	3263936	3263936	A	G	A>G	PSMG4	exonic	nonsynonymous SNV	DDD4K.00660	DDD_2017	28135719	4293	0	exome	Developmental Delay (DD)	psychiatric disorder	validated	.	non-ssc	.	PSMG4:NM_001128591:exon2:c.A193G:p.T65A,PSMG4:NM_001128592:exon2:c.A193G:p.T65A,PSMG4:NM_001135750:exon2:c.A193G:p.T65A	0.0014	0.0045	0.0014	.	.	.	0.0006	0.0052	0	0	0	0	0	0.0001	0.0009	0.0029	.	0.011	.	rs374935109	.	.	.	.	.	.
10667	6p25.1	6	5545413	5545413	C	G	C>G	FARS2	exonic	nonsynonymous SNV	DDD4K.01460	DDD_2017	28135719	4293	0	exome	Developmental Delay (DD)	psychiatric disorder	validated	.	non-ssc	.	FARS2:NM_001318872:exon5:c.C905G:p.A302G,FARS2:NM_006567:exon5:c.C905G:p.A302G	.	.	.	.	.	.	.	.	.	.	.	.	.	.	.	.	.	.	.	.	.	.	.	.	.	.
1832	6p24.3	6	7571713	7571713	T	C	T>C	DSP	exonic	nonsynonymous SNV	DDD4K.03560	DDD_2017	28135719	4293	0	exome	Developmental Delay (DD)	psychiatric disorder	validated	.	non-ssc	.	DSP:NM_001008844:exon14:c.T1799C:p.F600S,DSP:NM_001319034:exon14:c.T1799C:p.F600S,DSP:NM_004415:exon14:c.T1799C:p.F600S	.	.	.	.	.	.	.	.	.	.	.	.	.	.	.	.	.	.	.	rs564432914	.	.	.	.	.	.
54438	6p24.1	6	13365367	13365367	C	T	C>T	GFOD1	exonic	nonsynonymous SNV	DDD4K.00853	DDD_2017	28135719	4293	0	exome	Developmental Delay (DD)	psychiatric disorder	validated	.	non-ssc	.	GFOD1:NM_001242628:exon2:c.G472A:p.V158M,GFOD1:NM_001242630:exon2:c.G472A:p.V158M,GFOD1:NM_018988:exon2:c.G781A:p.V261M	.	.	.	.	.	.	.	.	.	.	.	.	.	.	.	.	.	.	.	.	COSM5709864	1(haematopoietic_and_lymphoid_tissue)	.	.	.	.
8350	6p22.2	6	26020982	26020982	G	A	G>A	HIST1H3A	exonic	nonsynonymous SNV	DDD4K.02212	DDD_2017	28135719	4293	0	exome	Developmental Delay (DD)	psychiatric disorder	validated	.	non-ssc	.	HIST1H3A:NM_003529:exon1:c.G265A:p.A89T	.	.	.	.	.	.	.	.	.	.	.	.	.	.	.	.	.	.	.	rs762470099	.	.	.	.	.	.
8364	6p22.2	6	26104449	26104449	A	C	A>C	HIST1H4C	exonic	nonsynonymous SNV	DDD4K.02490	DDD_2017	28135719	4293	0	exome	Developmental Delay (DD)	psychiatric disorder	validated	.	non-ssc	.	HIST1H4C:NM_003542:exon1:c.A274C:p.K92Q	.	.	.	.	.	.	.	.	.	.	.	.	.	.	.	.	.	.	.	.	.	.	.	.	.	.
3017	6p22.2	6	26158419	26158419	G	A	G>A	HIST1H2BD	exonic	nonsynonymous SNV	DDD4K.02268	DDD_2017	28135719	4293	0	exome	Developmental Delay (DD)	psychiatric disorder	validated	.	non-ssc	.	HIST1H2BD:NM_021063:exon1:c.G22A:p.A8T,HIST1H2BD:NM_138720:exon1:c.G22A:p.A8T	.	.	.	.	.	.	.	.	.	.	.	.	.	.	.	.	.	.	.	.	.	.	.	.	.	.
696	6p22.2	6	26501942	26501942	G	C	G>C	BTN1A1	exonic	nonsynonymous SNV	DDD4K.00038	DDD_2017	28135719	4293	0	exome	Developmental Delay (DD)	psychiatric disorder	validated	.	non-ssc	.	BTN1A1:NM_001732:exon2:c.G204C:p.K68N	.	.	.	.	.	.	.	.	.	.	.	.	.	.	.	.	.	.	.	.	.	.	.	.	.	.
8332	6p22.1	6	27833137	27833137	C	G	C>G	HIST1H2AL	exonic	nonsynonymous SNV	DDD4K.02447	DDD_2017	28135719	4293	0	exome	Developmental Delay (DD)	psychiatric disorder	validated	.	non-ssc	.	HIST1H2AL:NM_003511:exon1:c.C5G:p.S2W	.	.	.	.	.	.	.	.	.	.	.	.	.	.	.	.	.	.	.	.	.	.	.	.	.	.
114821	6p22.1	6	28543860	28543860	T	G	T>G	ZBED9	exonic	nonsynonymous SNV	DDD4K.02821	DDD_2017	28135719	4293	0	exome	Developmental Delay (DD)	psychiatric disorder	validated	.	non-ssc	.	ZBED9:NM_052923:exon3:c.A622C:p.S208R,ZBED9:NM_001329616:exon5:c.A169C:p.S57R	.	.	.	.	.	.	.	.	.	.	.	.	.	.	.	.	.	.	.	.	.	.	.	.	.	.
7919	6p21.33	6	31508178	31508178	G	T	G>T	DDX39B	exonic	nonsynonymous SNV	DDD4K.04133	DDD_2017	28135719	4293	0	exome	Developmental Delay (DD)	psychiatric disorder	validated	.	non-ssc	.	DDX39B:NM_004640:exon2:c.C132A:p.S44R,DDX39B:NM_080598:exon2:c.C132A:p.S44R	.	.	.	.	.	.	.	.	.	.	.	.	.	.	.	.	.	.	.	.	.	.	.	.	.	.
4049	6p21.33	6	31541387	31541387	G	T	G>T	LTA	exonic	nonsynonymous SNV	DDD4K.01450	DDD_2017	28135719	4293	0	exome	Developmental Delay (DD)	psychiatric disorder	validated	.	non-ssc	.	LTA:NM_000595:exon4:c.G535T:p.D179Y,LTA:NM_001159740:exon4:c.G535T:p.D179Y	.	.	.	.	.	.	.	.	.	.	.	.	.	.	.	.	.	.	.	.	.	.	.	.	.	.
7148	6p21.33	6	32049857	32049857	G	A	G>A	TNXB	exonic	nonsynonymous SNV	DDD4K.01140	DDD_2017	28135719	4293	0	exome	Developmental Delay (DD)	psychiatric disorder	validated	.	non-ssc	.	TNXB:NM_019105:exon9:c.C3692T:p.A1231V	.	.	.	.	.	.	.	.	.	.	.	.	.	.	.	.	.	.	.	.	.	.	.	.	.	.
177	6p21.32	6	32151674	32151674	C	T	C>T	AGER	exonic	nonsynonymous SNV	DDD4K.00813	DDD_2017	28135719	4293	0	exome	Developmental Delay (DD)	psychiatric disorder	validated	.	non-ssc	.	AGER:NM_001136:exon2:c.G143A:p.R48Q,AGER:NM_001206929:exon2:c.G143A:p.R48Q,AGER:NM_001206932:exon2:c.G143A:p.R48Q,AGER:NM_001206934:exon2:c.G143A:p.R48Q,AGER:NM_001206936:exon2:c.G143A:p.R48Q,AGER:NM_001206940:exon2:c.G143A:p.R48Q,AGER:NM_001206954:exon2:c.G143A:p.R48Q,AGER:NM_001206966:exon2:c.G143A:p.R48Q,AGER:NM_172197:exon2:c.G143A:p.R48Q	.	.	.	.	.	.	3.44e-05	0.0002	0	0	0	1.58e-05	0	6.15e-05	0.0002	0.0007	.	.	.	rs35030981	.	.	.	.	.	.
1302	6p21.32	6	33136319	33136319	G	T	G>T	COL11A2	exonic	nonsynonymous SNV	DDD4K.00861	DDD_2017	28135719	4293	0	exome	Developmental Delay (DD)	psychiatric disorder	validated	.	non-ssc	.	COL11A2:NM_080679:exon51:c.C3616A:p.P1206T,COL11A2:NM_080681:exon52:c.C3679A:p.P1227T,COL11A2:NM_080680:exon54:c.C3937A:p.P1313T	.	.	.	.	.	.	.	.	.	.	.	.	.	.	.	.	.	.	.	.	.	.	.	.	.	.
8831	6p21.32	6	33400583	33400583	G	A	G>A	SYNGAP1	exonic	nonsynonymous SNV	DDD4K.03670	DDD_2017	28135719	4293	0	exome	Developmental Delay (DD)	psychiatric disorder	validated	.	non-ssc	.	SYNGAP1:NM_001130066:exon5:c.G509A:p.R170Q,SYNGAP1:NM_006772:exon5:c.G509A:p.R170Q	.	.	.	.	.	.	.	.	.	.	.	.	.	.	.	.	.	.	.	.	.	.	Likely pathogenic	Mental_retardation\x2c_autosomal_dominant_5	RCV000417030.1	MedGen:OMIM
25803	6p21.31	6	34508815	34508815	G	A	G>A	SPDEF	exonic	nonsynonymous SNV	DDD4K.01189	DDD_2017	28135719	4293	0	exome	Developmental Delay (DD)	psychiatric disorder	validated	.	non-ssc	.	SPDEF:NM_001252294:exon3:c.C580T:p.R194C,SPDEF:NM_012391:exon3:c.C580T:p.R194C	.	.	.	.	.	.	8.17e-05	0	0	0.0002	0	0.0001	0	0	.	.	.	.	.	rs776371276	.	.	.	.	.	.
114781	6p21.2	6	38545415	38545415	C	T	C>T	BTBD9	exonic	nonsynonymous SNV	DDD4K.00940	DDD_2017	28135719	4293	0	exome	Developmental Delay (DD)	psychiatric disorder	validated	.	non-ssc	.	BTBD9:NM_001172418:exon5:c.G938A:p.R313H,BTBD9:NM_152733:exon5:c.G911A:p.R304H,BTBD9:NM_001099272:exon6:c.G1115A:p.R372H,BTBD9:NM_052893:exon7:c.G1115A:p.R372H	.	.	.	.	.	.	.	.	.	.	.	.	.	.	.	.	.	.	.	.	.	.	.	.	.	.
1769	6p21.2	6	38690707	38690707	C	T	C>T	DNAH8	exonic	nonsynonymous SNV	DDD4K.04200	DDD_2017	28135719	4293	0	exome	Developmental Delay (DD)	psychiatric disorder	validated	.	non-ssc	.	DNAH8:NM_001206927:exon2:c.C122T:p.A41V	.	.	.	.	.	.	.	.	.	.	.	.	.	.	.	.	.	.	.	.	.	.	.	.	.	.
5961	6p21.1	6	42690035	42690035	C	T	C>T	PRPH2	exonic	nonsynonymous SNV	DDD4K.03142	DDD_2017	28135719	4293	0	exome	Developmental Delay (DD)	psychiatric disorder	validated	.	non-ssc	.	PRPH2:NM_000322:exon1:c.G38A:p.R13Q	.	.	.	.	.	.	8.24e-06	0	0	0	0	1.5e-05	0	0	.	.	.	.	.	rs745427463	.	.	.	.	.	.
5528	6p21.1	6	42975003	42975003	G	A	G>A	PPP2R5D	exonic	nonsynonymous SNV	DDD4K.01233	DDD_2017	28135719	4293	0	exome	Developmental Delay (DD)	psychiatric disorder	validated	.	non-ssc	.	PPP2R5D:NM_180977:exon3:c.G274A:p.E92K,PPP2R5D:NM_001270476:exon5:c.G139A:p.E47K,PPP2R5D:NM_006245:exon5:c.G592A:p.E198K,PPP2R5D:NM_180976:exon5:c.G496A:p.E166K	.	.	.	.	.	.	.	.	.	.	.	.	.	.	.	.	.	.	.	rs863225082	COSM3949242	1(lung)	Pathogenic|Pathogenic	Mental_retardation\x2c_autosomal_dominant_35|not_provided	RCV000170482.5|RCV000202079.1	MedGen:OMIM|MedGen
5528	6p21.1	6	42975003	42975003	G	A	G>A	PPP2R5D	exonic	nonsynonymous SNV	DDD4K.00067	DDD_2017	28135719	4293	0	exome	Developmental Delay (DD)	psychiatric disorder	validated	.	non-ssc	.	PPP2R5D:NM_180977:exon3:c.G274A:p.E92K,PPP2R5D:NM_001270476:exon5:c.G139A:p.E47K,PPP2R5D:NM_006245:exon5:c.G592A:p.E198K,PPP2R5D:NM_180976:exon5:c.G496A:p.E166K	.	.	.	.	.	.	.	.	.	.	.	.	.	.	.	.	.	.	.	rs863225082	COSM3949242	1(lung)	Pathogenic|Pathogenic	Mental_retardation\x2c_autosomal_dominant_35|not_provided	RCV000170482.5|RCV000202079.1	MedGen:OMIM|MedGen
5528	6p21.1	6	42975003	42975003	G	A	G>A	PPP2R5D	exonic	nonsynonymous SNV	DDD4K.02987	DDD_2017	28135719	4293	0	exome	Developmental Delay (DD)	psychiatric disorder	validated	.	non-ssc	.	PPP2R5D:NM_180977:exon3:c.G274A:p.E92K,PPP2R5D:NM_001270476:exon5:c.G139A:p.E47K,PPP2R5D:NM_006245:exon5:c.G592A:p.E198K,PPP2R5D:NM_180976:exon5:c.G496A:p.E166K	.	.	.	.	.	.	.	.	.	.	.	.	.	.	.	.	.	.	.	rs863225082	COSM3949242	1(lung)	Pathogenic|Pathogenic	Mental_retardation\x2c_autosomal_dominant_35|not_provided	RCV000170482.5|RCV000202079.1	MedGen:OMIM|MedGen
5528	6p21.1	6	42975013	42975013	C	G	C>G	PPP2R5D	exonic	nonsynonymous SNV	DDD4K.00339	DDD_2017	28135719	4293	0	exome	Developmental Delay (DD)	psychiatric disorder	validated	.	non-ssc	.	PPP2R5D:NM_180977:exon3:c.C284G:p.P95R,PPP2R5D:NM_001270476:exon5:c.C149G:p.P50R,PPP2R5D:NM_006245:exon5:c.C602G:p.P201R,PPP2R5D:NM_180976:exon5:c.C506G:p.P169R	.	.	.	.	.	.	.	.	.	.	.	.	.	.	.	.	.	.	.	.	.	.	Pathogenic	Mental_retardation\x2c_autosomal_dominant_35	RCV000170483.4	MedGen:OMIM
23113	6p21.1	6	43173912	43173912	G	A	G>A	CUL9	exonic	nonsynonymous SNV	DDD4K.03319	DDD_2017	28135719	4293	0	exome	Developmental Delay (DD)	psychiatric disorder	validated	.	non-ssc	.	CUL9:NM_015089:exon25:c.G4961A:p.R1654Q	.	.	.	.	.	.	1.73e-05	0	9.33e-05	0	0	1.58e-05	0	0	.	.	.	.	.	rs754293862	.	.	.	.	.	.
84630	6p21.1	6	43227360	43227360	G	A	G>A	TTBK1	exonic	nonsynonymous SNV	DDD4K.02567	DDD_2017	28135719	4293	0	exome	Developmental Delay (DD)	psychiatric disorder	validated	.	non-ssc	.	TTBK1:NM_032538:exon12:c.G1340A:p.R447H	0.0004	.	.	0.002	.	.	8.75e-05	0.0009	0.0001	0	0	0	0	0	0.0001	0.0002	.	.	.	rs146561671	.	.	.	.	.	.
55362	6p21.1	6	44102451	44102451	G	A	G>A	TMEM63B	exonic	nonsynonymous SNV	DDD4K.03671	DDD_2017	28135719	4293	0	exome	Developmental Delay (DD)	psychiatric disorder	validated	.	non-ssc	.	TMEM63B:NM_001318792:exon2:c.G130A:p.V44M,TMEM63B:NM_018426:exon2:c.G130A:p.V44M	.	.	.	.	.	.	.	.	.	.	.	.	.	.	.	.	.	.	.	.	.	.	.	.	.	.
57505	6p21.1	6	44272875	44272875	G	A	G>A	AARS2	exonic	nonsynonymous SNV	DDD4K.01688	DDD_2017	28135719	4293	0	exome	Developmental Delay (DD)	psychiatric disorder	validated	.	non-ssc	.	AARS2:NM_020745:exon11:c.C1495T:p.L499F	.	.	.	.	.	.	.	.	.	.	.	.	.	.	.	.	.	.	.	.	.	.	.	.	.	.
5314	6p12.3	6	51523850	51523850	G	C	G>C	PKHD1	exonic	nonsynonymous SNV	DDD4K.02892	DDD_2017	28135719	4293	0	exome	Developmental Delay (DD)	psychiatric disorder	validated	.	non-ssc	.	PKHD1:NM_138694:exon61:c.C11074G:p.R3692G	.	.	.	.	.	.	.	.	.	.	.	.	.	.	.	.	.	.	.	.	.	.	.	.	.	.
1297	6q13	6	70926610	70926610	G	T	G>T	COL9A1	exonic	nonsynonymous SNV	DDD4K.01755	DDD_2017	28135719	4293	0	exome	Developmental Delay (DD)	psychiatric disorder	validated	.	non-ssc	.	COL9A1:NM_078485:exon32:c.C2027A:p.P676H,COL9A1:NM_001851:exon38:c.C2756A:p.P919H	.	.	.	.	.	.	.	.	.	.	.	.	.	.	.	.	.	.	.	.	.	.	.	.	.	.
55023	6q14.1	6	79724803	79724803	T	C	T>C	PHIP	exonic	nonsynonymous SNV	DDD4K.00781	DDD_2017	28135719	4293	0	exome	Developmental Delay (DD)	psychiatric disorder	validated	.	non-ssc	.	PHIP:NM_017934:exon15:c.A1520G:p.N507S	.	.	.	.	.	.	.	.	.	.	.	.	.	.	.	.	.	.	.	.	.	.	.	.	.	.
55023	6q14.1	6	79752692	79752692	A	T	A>T	PHIP	exonic	nonsynonymous SNV	DDD4K.02383	DDD_2017	28135719	4293	0	exome	Developmental Delay (DD)	psychiatric disorder	validated	.	non-ssc	.	PHIP:NM_017934:exon7:c.T468A:p.N156K	.	.	.	.	.	.	.	.	.	.	.	.	.	.	.	.	.	.	.	.	.	.	.	.	.	.
5238	6q14.1	6	83880194	83880194	C	T	C>T	PGM3	exonic	nonsynonymous SNV	DDD4K.02084	DDD_2017	28135719	4293	0	exome	Developmental Delay (DD)	psychiatric disorder	validated	.	non-ssc	.	PGM3:NM_001199918:exon11:c.G1126A:p.A376T,PGM3:NM_001199919:exon12:c.G1369A:p.A457T,PGM3:NM_015599:exon12:c.G1369A:p.A457T,PGM3:NM_001199917:exon13:c.G1453A:p.A485T	.	.	.	.	.	.	.	.	.	.	.	.	.	.	.	.	.	.	.	.	.	.	.	.	.	.
23595	6q15	6	88313235	88313235	C	T	C>T	ORC3	exonic	nonsynonymous SNV	DDD4K.02692	DDD_2017	28135719	4293	0	exome	Developmental Delay (DD)	psychiatric disorder	validated	.	non-ssc	.	ORC3:NM_012381:exon4:c.C311T:p.A104V,ORC3:NM_181837:exon4:c.C311T:p.A104V	.	.	.	.	.	.	.	.	.	.	.	.	.	.	.	.	.	.	.	.	COSM4792902;COSM4792901	2(liver)	.	.	.	.
84694	6q15	6	90605791	90605791	C	T	C>T	GJA10	exonic	nonsynonymous SNV	DDD4K.03957	DDD_2017	28135719	4293	0	exome	Developmental Delay (DD)	psychiatric disorder	validated	.	non-ssc	.	GJA10:NM_032602:exon1:c.C1604T:p.S535L	.	.	.	.	.	.	0.0002	0	0.0014	0.0001	0	0.0001	0	0.0002	.	.	.	.	.	.	COSM281375	1(stomach);1(large_intestine);1(endometrium)	.	.	.	.
6885	6q15	6	91263200	91263200	C	T	C>T	MAP3K7	exonic	nonsynonymous SNV	DDD4K.03537	DDD_2017	28135719	4293	0	exome	Developmental Delay (DD)	psychiatric disorder	validated	.	non-ssc	.	MAP3K7:NM_003188:exon7:c.G713A:p.R238Q,MAP3K7:NM_145331:exon7:c.G713A:p.R238Q,MAP3K7:NM_145332:exon7:c.G713A:p.R238Q,MAP3K7:NM_145333:exon7:c.G713A:p.R238Q	.	.	.	.	.	.	.	.	.	.	.	.	.	.	.	.	.	.	.	.	.	.	.	.	.	.
6885	6q15	6	91263284	91263284	C	G	C>G	MAP3K7	exonic	nonsynonymous SNV	DDD4K.00910	DDD_2017	28135719	4293	0	exome	Developmental Delay (DD)	psychiatric disorder	validated	.	non-ssc	.	MAP3K7:NM_003188:exon7:c.G629C:p.C210S,MAP3K7:NM_145331:exon7:c.G629C:p.C210S,MAP3K7:NM_145332:exon7:c.G629C:p.C210S,MAP3K7:NM_145333:exon7:c.G629C:p.C210S	.	.	.	.	.	.	.	.	.	.	.	.	.	.	.	.	.	.	.	.	.	.	.	.	.	.
7259	6q22.1	6	116599685	116599685	C	T	C>T	TSPYL1	exonic	nonsynonymous SNV	DDD4K.02022	DDD_2017	28135719	4293	0	exome	Developmental Delay (DD)	psychiatric disorder	validated	.	non-ssc	.	TSPYL1:NM_003309:exon1:c.G1309A:p.G437S	.	.	.	.	.	.	.	.	.	.	.	.	.	.	.	.	.	.	.	.	.	.	.	.	.	.
387104	6q22.33	6	127796845	127796845	G	A	G>A	SOGA3	exonic	nonsynonymous SNV	DDD4K.00306	DDD_2017	28135719	4293	0	exome	Developmental Delay (DD)	psychiatric disorder	validated	.	non-ssc	.	SOGA3:NM_001012279:exon6:c.C2326T:p.P776S	.	.	.	.	.	.	.	.	.	.	.	.	.	.	.	.	.	.	.	.	.	.	.	.	.	.
5191	6q23.3	6	137219359	137219359	A	G	A>G	PEX7	exonic	nonsynonymous SNV	DDD4K.03953	DDD_2017	28135719	4293	0	exome	Developmental Delay (DD)	psychiatric disorder	validated	.	non-ssc	.	PEX7:NM_000288:exon9:c.A883G:p.S295G	.	.	.	.	.	.	.	.	.	.	.	.	.	.	.	.	.	.	.	.	.	.	.	.	.	.
57221	6q23.3	6	138632588	138632588	G	A	G>A	ARFGEF3	exonic	nonsynonymous SNV	DDD4K.04265	DDD_2017	28135719	4293	0	exome	Developmental Delay (DD)	psychiatric disorder	validated	.	non-ssc	.	ARFGEF3:NM_020340:exon25:c.G4141A:p.G1381R	0.001	.	0.0014	.	0.004	.	0.0042	0.0013	0.0049	0.0002	0.0011	0.006	0.0057	0.0023	0.0045	0.0009	0.0063	.	.	rs118049612	.	.	.	.	.	.
57224	6q23.3	6	138745228	138745228	T	C	T>C	NHSL1	exonic	nonsynonymous SNV	DDD4K.00250	DDD_2017	28135719	4293	0	exome	Developmental Delay (DD)	psychiatric disorder	validated	.	non-ssc	.	NHSL1:NM_020464:exon7:c.A4823G:p.E1608G,NHSL1:NM_001144060:exon8:c.A4811G:p.E1604G	.	.	.	.	.	.	.	.	.	.	.	.	.	.	.	.	.	.	.	.	.	.	.	.	.	.
345930	6q24.1	6	139164312	139164312	G	A	G>A	ECT2L	exonic	nonsynonymous SNV	DDD4K.00043	DDD_2017	28135719	4293	0	exome	Developmental Delay (DD)	psychiatric disorder	validated	.	non-ssc	.	ECT2L:NM_001195037:exon5:c.G539A:p.R180K,ECT2L:NM_001077706:exon6:c.G539A:p.R180K	.	.	.	.	.	.	.	.	.	.	.	.	.	.	.	.	.	.	.	.	.	.	.	.	.	.
23118	6q25.1	6	149699398	149699398	A	G	A>G	TAB2	exonic	nonsynonymous SNV	DDD4K.02968	DDD_2017	28135719	4293	0	exome	Developmental Delay (DD)	psychiatric disorder	validated	.	non-ssc	.	TAB2:NM_001292034:exon3:c.A347G:p.Q116R,TAB2:NM_001292035:exon3:c.A251G:p.Q84R,TAB2:NM_015093:exon5:c.A347G:p.Q116R	.	.	.	.	.	.	.	.	.	.	.	.	.	.	.	.	.	.	.	.	.	.	.	.	.	.
7432	6q25.2	6	153073362	153073362	G	T	G>T	VIP	exonic	nonsynonymous SNV	DDD4K.02685	DDD_2017	28135719	4293	0	exome	Developmental Delay (DD)	psychiatric disorder	validated	.	non-ssc	.	VIP:NM_003381:exon2:c.G50T:p.S17I,VIP:NM_194435:exon2:c.G50T:p.S17I	.	.	.	.	.	.	0	0	0	0	0	0	0	0	.	.	.	.	.	rs777024766	.	.	.	.	.	.
3482	6q25.3	6	160471560	160471560	C	T	C>T	IGF2R	exonic	nonsynonymous SNV	DDD4K.00003	DDD_2017	28135719	4293	0	exome	Developmental Delay (DD)	psychiatric disorder	validated	.	non-ssc	.	IGF2R:NM_000876:exon19:c.C2570T:p.P857L	.	.	.	.	.	.	3.3e-05	0	0	0.0001	0	4.5e-05	0	0	0.0001	.	0.0001	.	.	rs370610400	COSM1621165	1(liver)	.	.	.	.
4301	6q27	6	168291620	168291620	C	T	C>T	AFDN	exonic	nonsynonymous SNV	DDD4K.03222	DDD_2017	28135719	4293	0	exome	Developmental Delay (DD)	psychiatric disorder	validated	.	non-ssc	.	AFDN:NM_001040000:exon8:c.C1088T:p.T363I,AFDN:NM_001207008:exon8:c.C1085T:p.T362I,AFDN:NM_001291964:exon8:c.C965T:p.T322I	.	.	.	.	.	.	.	.	.	.	.	.	.	.	.	.	.	.	.	.	.	.	.	.	.	.
54919	7p22.3	7	819597	819597	A	C	A>C	DNAAF5	exonic	nonsynonymous SNV	DDD4K.02223	DDD_2017	28135719	4293	0	exome	Developmental Delay (DD)	psychiatric disorder	validated	.	non-ssc	.	DNAAF5:NM_017802:exon12:c.A2247C:p.L749F	.	.	.	.	.	.	.	.	.	.	.	.	.	.	.	.	.	.	.	.	.	.	.	.	.	.
5879	7p22.1	7	6431598	6431598	G	A	G>A	RAC1	exonic	nonsynonymous SNV	DDD4K.04152	DDD_2017	28135719	4293	0	exome	Developmental Delay (DD)	psychiatric disorder	validated	.	non-ssc	.	RAC1:NM_006908:exon3:c.G151A:p.V51M,RAC1:NM_018890:exon3:c.G151A:p.V51M	.	.	.	.	.	.	.	.	.	.	.	.	.	.	.	.	.	.	.	.	.	.	.	.	.	.
5879	7p22.1	7	6431637	6431637	T	G	T>G	RAC1	exonic	nonsynonymous SNV	DDD4K.02476	DDD_2017	28135719	4293	0	exome	Developmental Delay (DD)	psychiatric disorder	validated	.	non-ssc	.	RAC1:NM_006908:exon3:c.T190G:p.Y64D,RAC1:NM_018890:exon3:c.T190G:p.Y64D	.	.	.	.	.	.	.	.	.	.	.	.	.	.	.	.	.	.	.	.	.	.	.	.	.	.
5879	7p22.1	7	6431665	6431665	C	T	C>T	RAC1	exonic	nonsynonymous SNV	DDD4K.03483	DDD_2017	28135719	4293	0	exome	Developmental Delay (DD)	psychiatric disorder	validated	.	non-ssc	.	RAC1:NM_006908:exon3:c.C218T:p.P73L,RAC1:NM_018890:exon3:c.C218T:p.P73L	.	.	.	.	.	.	.	.	.	.	.	.	.	.	.	.	.	.	.	.	.	.	.	.	.	.
8701	7p15.3	7	21892229	21892229	G	A	G>A	DNAH11	exonic	nonsynonymous SNV	DDD4K.01630	DDD_2017	28135719	4293	0	exome	Developmental Delay (DD)	psychiatric disorder	validated	.	non-ssc	.	DNAH11:NM_001277115:exon67:c.G11041A:p.V3681M	.	.	.	.	.	.	1.72e-05	0	0	0	0	3.05e-05	0	0	0.0001	.	0.0001	.	.	rs371617349	COSM5358331;COSM5358330	2(large_intestine)	.	.	.	.
51678	7p15.3	7	24720063	24720063	C	T	C>T	MPP6	exonic	nonsynonymous SNV	DDD4K.00047	DDD_2017	28135719	4293	0	exome	Developmental Delay (DD)	psychiatric disorder	validated	.	non-ssc	.	MPP6:NM_001303037:exon11:c.C1370T:p.A457V,MPP6:NM_016447:exon12:c.C1370T:p.A457V	0.0002	.	0.0014	.	.	.	8.24e-06	0	8.64e-05	0	0	0	0	0	.	.	.	.	.	rs200954257	COSM5549927	1(prostate)	.	.	.	.
8621	7p14.1	7	40039057	40039057	G	C	G>C	CDK13	exonic	nonsynonymous SNV	DDD4K.01645	DDD_2017	28135719	4293	0	exome	Developmental Delay (DD)	psychiatric disorder	validated	.	non-ssc	.	CDK13:NM_003718:exon4:c.G2140C:p.G714R,CDK13:NM_031267:exon4:c.G2140C:p.G714R	.	.	.	.	.	.	.	.	.	.	.	.	.	.	.	.	.	.	.	.	.	.	Pathogenic	CONGENITAL_HEART_DEFECTS\x2c_DYSMORPHIC_FACIAL_FEATURES\x2c_AND_INTELLECTUAL_DEVELOPMENTAL_DISORDER	RCV000417209.1	MedGen:OMIM
8621	7p14.1	7	40039066	40039066	G	A	G>A	CDK13	exonic	nonsynonymous SNV	DDD4K.02553	DDD_2017	28135719	4293	0	exome	Developmental Delay (DD)	psychiatric disorder	validated	.	non-ssc	.	CDK13:NM_003718:exon4:c.G2149A:p.G717R,CDK13:NM_031267:exon4:c.G2149A:p.G717R	.	.	.	.	.	.	.	.	.	.	.	.	.	.	.	.	.	.	.	.	.	.	Pathogenic	CONGENITAL_HEART_DEFECTS\x2c_DYSMORPHIC_FACIAL_FEATURES\x2c_AND_INTELLECTUAL_DEVELOPMENTAL_DISORDER	RCV000417213.1	MedGen:OMIM
8621	7p14.1	7	40039066	40039066	G	A	G>A	CDK13	exonic	nonsynonymous SNV	DDD4K.02998	DDD_2017	28135719	4293	0	exome	Developmental Delay (DD)	psychiatric disorder	validated	.	non-ssc	.	CDK13:NM_003718:exon4:c.G2149A:p.G717R,CDK13:NM_031267:exon4:c.G2149A:p.G717R	.	.	.	.	.	.	.	.	.	.	.	.	.	.	.	.	.	.	.	.	.	.	Pathogenic	CONGENITAL_HEART_DEFECTS\x2c_DYSMORPHIC_FACIAL_FEATURES\x2c_AND_INTELLECTUAL_DEVELOPMENTAL_DISORDER	RCV000417213.1	MedGen:OMIM
8621	7p14.1	7	40039073	40039073	T	G	T>G	CDK13	exonic	nonsynonymous SNV	DDD4K.04200	DDD_2017	28135719	4293	0	exome	Developmental Delay (DD)	psychiatric disorder	validated	.	non-ssc	.	CDK13:NM_003718:exon4:c.T2156G:p.V719G,CDK13:NM_031267:exon4:c.T2156G:p.V719G	.	.	.	.	.	.	.	.	.	.	.	.	.	.	.	.	.	.	.	.	.	.	.	.	.	.
8621	7p14.1	7	40041478	40041478	A	G	A>G	CDK13	exonic	nonsynonymous SNV	DDD4K.00408	DDD_2017	28135719	4293	0	exome	Developmental Delay (DD)	psychiatric disorder	validated	.	non-ssc	.	CDK13:NM_003718:exon5:c.A2201G:p.K734R,CDK13:NM_031267:exon5:c.A2201G:p.K734R	.	.	.	.	.	.	.	.	.	.	.	.	.	.	.	.	.	.	.	.	.	.	.	.	.	.
8621	7p14.1	7	40041529	40041529	G	A	G>A	CDK13	exonic	nonsynonymous SNV	DDD4K.00410	DDD_2017	28135719	4293	0	exome	Developmental Delay (DD)	psychiatric disorder	validated	.	non-ssc	.	CDK13:NM_003718:exon5:c.G2252A:p.R751Q,CDK13:NM_031267:exon5:c.G2252A:p.R751Q	.	.	.	.	.	.	.	.	.	.	.	.	.	.	.	.	.	.	.	.	.	.	Pathogenic	CONGENITAL_HEART_DEFECTS\x2c_DYSMORPHIC_FACIAL_FEATURES\x2c_AND_INTELLECTUAL_DEVELOPMENTAL_DISORDER	RCV000417212.1	MedGen:OMIM
8621	7p14.1	7	40085606	40085606	A	G	A>G	CDK13	exonic	nonsynonymous SNV	DDD4K.01999	DDD_2017	28135719	4293	0	exome	Developmental Delay (DD)	psychiatric disorder	validated	.	non-ssc	.	CDK13:NM_003718:exon6:c.A2525G:p.N842S,CDK13:NM_031267:exon6:c.A2525G:p.N842S	.	.	.	.	.	.	.	.	.	.	.	.	.	.	.	.	.	.	.	.	.	.	Pathogenic|Pathogenic|Pathogenic|Pathogenic|Pathogenic|Pathogenic	Abnormal_facial_shape|Delayed_speech_and_language_development|Failure_to_thrive|Intellectual_disability_(moderate)|Muscular_hypotonia|CONGENITAL_HEART_DEFECTS\x2c_DYSMORPHIC_FACIAL_FEATURES\x2c_AND_INTELLECTUAL_DEVELOPMENTAL_DISORDER	RCV000224970.1|RCV000224970.1|RCV000224970.1|RCV000224970.1|RCV000224970.1|RCV000417211.1	Human_Phenotype_Ontology:MedGen|Human_Phenotype_Ontology:MedGen|Human_Phenotype_Ontology:MedGen|MedGen|Human_Phenotype_Ontology:MedGen|MedGen:OMIM
8621	7p14.1	7	40085606	40085606	A	G	A>G	CDK13	exonic	nonsynonymous SNV	DDD4K.03819	DDD_2017	28135719	4293	0	exome	Developmental Delay (DD)	psychiatric disorder	validated	.	non-ssc	.	CDK13:NM_003718:exon6:c.A2525G:p.N842S,CDK13:NM_031267:exon6:c.A2525G:p.N842S	.	.	.	.	.	.	.	.	.	.	.	.	.	.	.	.	.	.	.	.	.	.	Pathogenic|Pathogenic|Pathogenic|Pathogenic|Pathogenic|Pathogenic	Abnormal_facial_shape|Delayed_speech_and_language_development|Failure_to_thrive|Intellectual_disability_(moderate)|Muscular_hypotonia|CONGENITAL_HEART_DEFECTS\x2c_DYSMORPHIC_FACIAL_FEATURES\x2c_AND_INTELLECTUAL_DEVELOPMENTAL_DISORDER	RCV000224970.1|RCV000224970.1|RCV000224970.1|RCV000224970.1|RCV000224970.1|RCV000417211.1	Human_Phenotype_Ontology:MedGen|Human_Phenotype_Ontology:MedGen|Human_Phenotype_Ontology:MedGen|MedGen|Human_Phenotype_Ontology:MedGen|MedGen:OMIM
8621	7p14.1	7	40085606	40085606	A	G	A>G	CDK13	exonic	nonsynonymous SNV	DDD4K.01725	DDD_2017	28135719	4293	0	exome	Developmental Delay (DD)	psychiatric disorder	validated	.	non-ssc	.	CDK13:NM_003718:exon6:c.A2525G:p.N842S,CDK13:NM_031267:exon6:c.A2525G:p.N842S	.	.	.	.	.	.	.	.	.	.	.	.	.	.	.	.	.	.	.	.	.	.	Pathogenic|Pathogenic|Pathogenic|Pathogenic|Pathogenic|Pathogenic	Abnormal_facial_shape|Delayed_speech_and_language_development|Failure_to_thrive|Intellectual_disability_(moderate)|Muscular_hypotonia|CONGENITAL_HEART_DEFECTS\x2c_DYSMORPHIC_FACIAL_FEATURES\x2c_AND_INTELLECTUAL_DEVELOPMENTAL_DISORDER	RCV000224970.1|RCV000224970.1|RCV000224970.1|RCV000224970.1|RCV000224970.1|RCV000417211.1	Human_Phenotype_Ontology:MedGen|Human_Phenotype_Ontology:MedGen|Human_Phenotype_Ontology:MedGen|MedGen|Human_Phenotype_Ontology:MedGen|MedGen:OMIM
8621	7p14.1	7	40087455	40087455	G	A	G>A	CDK13	exonic	nonsynonymous SNV	DDD4K.00381	DDD_2017	28135719	4293	0	exome	Developmental Delay (DD)	psychiatric disorder	validated	.	non-ssc	.	CDK13:NM_003718:exon7:c.G2579A:p.R860Q,CDK13:NM_031267:exon7:c.G2579A:p.R860Q	.	.	.	.	.	.	.	.	.	.	.	.	.	.	.	.	.	.	.	.	COSM3638628	1(skin)	.	.	.	.
8621	7p14.1	7	40102444	40102444	G	T	G>T	CDK13	exonic	nonsynonymous SNV	DDD4K.02539	DDD_2017	28135719	4293	0	exome	Developmental Delay (DD)	psychiatric disorder	validated	.	non-ssc	.	CDK13:NM_003718:exon8:c.G2620T:p.V874L,CDK13:NM_031267:exon8:c.G2620T:p.V874L	.	.	.	.	.	.	.	.	.	.	.	.	.	.	.	.	.	.	.	.	.	.	.	.	.	.
816	7p13	7	44281927	44281927	C	T	C>T	CAMK2B	exonic	nonsynonymous SNV	DDD4K.00644	DDD_2017	28135719	4293	0	exome	Developmental Delay (DD)	psychiatric disorder	validated	.	non-ssc	.	CAMK2B:NM_001220:exon10:c.G709A:p.E237K,CAMK2B:NM_001293170:exon10:c.G709A:p.E237K,CAMK2B:NM_172078:exon10:c.G709A:p.E237K,CAMK2B:NM_172079:exon10:c.G709A:p.E237K,CAMK2B:NM_172080:exon10:c.G709A:p.E237K,CAMK2B:NM_172081:exon10:c.G709A:p.E237K,CAMK2B:NM_172082:exon10:c.G709A:p.E237K,CAMK2B:NM_172083:exon10:c.G709A:p.E237K,CAMK2B:NM_172084:exon10:c.G709A:p.E237K	.	.	.	.	.	.	.	.	.	.	.	.	.	.	.	.	.	.	.	.	COSM1549766	1(urinary_tract);1(lung)	.	.	.	.
64005	7p13	7	45009309	45009309	G	A	G>A	MYO1G	exonic	nonsynonymous SNV	DDD4K.03376	DDD_2017	28135719	4293	0	exome	Developmental Delay (DD)	psychiatric disorder	validated	.	non-ssc	.	MYO1G:NM_033054:exon11:c.C1498T:p.R500C	.	.	.	.	.	.	2.5e-05	9.74e-05	0	0	0	1.52e-05	0	6.13e-05	.	.	.	.	.	rs762149642	.	.	.	.	.	.
64005	7p13	7	45009399	45009399	C	T	C>T	MYO1G	exonic	nonsynonymous SNV	DDD4K.03560	DDD_2017	28135719	4293	0	exome	Developmental Delay (DD)	psychiatric disorder	validated	.	non-ssc	.	MYO1G:NM_033054:exon11:c.G1408A:p.E470K	.	.	.	.	.	.	.	.	.	.	.	.	.	.	.	.	.	.	.	.	.	.	.	.	.	.
168507	7p12.3	7	47944911	47944911	A	T	A>T	PKD1L1	exonic	nonsynonymous SNV	DDD4K.02848	DDD_2017	28135719	4293	0	exome	Developmental Delay (DD)	psychiatric disorder	validated	.	non-ssc	.	PKD1L1:NM_138295:exon11:c.T1534A:p.Y512N	.	.	.	.	.	.	.	.	.	.	.	.	.	.	.	.	.	.	.	.	.	.	.	.	.	.
154664	7p12.3	7	48312799	48312799	T	C	T>C	ABCA13	exonic	nonsynonymous SNV	DDD4K.02608	DDD_2017	28135719	4293	0	exome	Developmental Delay (DD)	psychiatric disorder	validated	.	non-ssc	.	ABCA13:NM_152701:exon17:c.T3536C:p.F1179S	.	.	.	.	.	.	.	.	.	.	.	.	.	.	.	.	.	.	.	.	.	.	.	.	.	.
63979	7p12.1	7	50514957	50514957	T	C	T>C	FIGNL1	exonic	nonsynonymous SNV	DDD4K.00228	DDD_2017	28135719	4293	0	exome	Developmental Delay (DD)	psychiatric disorder	validated	.	non-ssc	.	FIGNL1:NM_001287495:exon2:c.A29G:p.H10R,FIGNL1:NM_001287493:exon3:c.A29G:p.H10R,FIGNL1:NM_001287494:exon3:c.A29G:p.H10R,FIGNL1:NM_001042762:exon4:c.A29G:p.H10R,FIGNL1:NM_001287492:exon4:c.A29G:p.H10R,FIGNL1:NM_001346561:exon4:c.A29G:p.H10R,FIGNL1:NM_001346562:exon4:c.A29G:p.H10R,FIGNL1:NM_001346564:exon4:c.A29G:p.H10R,FIGNL1:NM_022116:exon4:c.A29G:p.H10R,FIGNL1:NM_001346560:exon5:c.A29G:p.H10R,FI…	.	.	.	.	.	.	.	.	.	.	.	.	.	.	.	.	.	.	.	.	.	.	.	.	.	.
7532	7q11.23	7	75959240	75959240	T	G	T>G	YWHAG	exonic	nonsynonymous SNV	DDD4K.00159	DDD_2017	28135719	4293	0	exome	Developmental Delay (DD)	psychiatric disorder	validated	.	non-ssc	.	YWHAG:NM_012479:exon2:c.A398C:p.Y133S	.	.	.	.	.	.	.	.	.	.	.	.	.	.	.	.	.	.	.	.	.	.	.	.	.	.
7532	7q11.23	7	75959244	75959244	G	A	G>A	YWHAG	exonic	nonsynonymous SNV	DDD4K.03583	DDD_2017	28135719	4293	0	exome	Developmental Delay (DD)	psychiatric disorder	validated	.	non-ssc	.	YWHAG:NM_012479:exon2:c.C394T:p.R132C	.	.	.	.	.	.	.	.	.	.	.	.	.	.	.	.	.	.	.	.	.	.	.	.	.	.
57157	7q21.11	7	77522942	77522942	A	T	A>T	PHTF2	exonic	nonsynonymous SNV	DDD4K.00276	DDD_2017	28135719	4293	0	exome	Developmental Delay (DD)	psychiatric disorder	validated	.	non-ssc	.	PHTF2:NM_001127357:exon2:c.A63T:p.Q21H,PHTF2:NM_001127359:exon2:c.A63T:p.Q21H,PHTF2:NM_020432:exon2:c.A63T:p.Q21H,PHTF2:NM_001127358:exon3:c.A63T:p.Q21H,PHTF2:NM_001127360:exon3:c.A63T:p.Q21H	.	.	.	.	.	.	.	.	.	.	.	.	.	.	.	.	.	.	.	.	.	.	.	.	.	.
2770	7q21.11	7	79764594	79764594	G	C	G>C	GNAI1	exonic	nonsynonymous SNV	DDD4K.01946	DDD_2017	28135719	4293	0	exome	Developmental Delay (DD)	psychiatric disorder	validated	.	non-ssc	.	GNAI1:NM_002069:exon1:c.G118C:p.G40R	.	.	.	.	.	.	.	.	.	.	.	.	.	.	.	.	.	.	.	.	.	.	.	.	.	.
2770	7q21.11	7	79818303	79818303	A	C	A>C	GNAI1	exonic	nonsynonymous SNV	DDD4K.02317	DDD_2017	28135719	4293	0	exome	Developmental Delay (DD)	psychiatric disorder	validated	.	non-ssc	.	GNAI1:NM_002069:exon2:c.A155C:p.Q52P	.	.	.	.	.	.	.	.	.	.	.	.	.	.	.	.	.	.	.	.	.	.	.	.	.	.
2770	7q21.11	7	79842120	79842120	A	G	A>G	GNAI1	exonic	nonsynonymous SNV	DDD4K.04109	DDD_2017	28135719	4293	0	exome	Developmental Delay (DD)	psychiatric disorder	validated	.	non-ssc	.	GNAI1:NM_001256414:exon7:c.A653G:p.K218R,GNAI1:NM_002069:exon7:c.A809G:p.K270R	.	.	.	.	.	.	.	.	.	.	.	.	.	.	.	.	.	.	.	.	.	.	.	.	.	.
2770	7q21.11	7	79846739	79846739	T	A	T>A	GNAI1	exonic	nonsynonymous SNV	DDD4K.00594	DDD_2017	28135719	4293	0	exome	Developmental Delay (DD)	psychiatric disorder	validated	.	non-ssc	.	GNAI1:NM_001256414:exon8:c.T839A:p.V280E,GNAI1:NM_002069:exon8:c.T995A:p.V332E	.	.	.	.	.	.	.	.	.	.	.	.	.	.	.	.	.	.	.	.	.	.	.	.	.	.
10512	7q21.11	7	80374231	80374231	C	A	C>A	SEMA3C	exonic	nonsynonymous SNV	DDD4K.04017	DDD_2017	28135719	4293	0	exome	Developmental Delay (DD)	psychiatric disorder	validated	.	non-ssc	.	SEMA3C:NM_001350120:exon18:c.G2289T:p.R763S,SEMA3C:NM_006379:exon18:c.G2235T:p.R745S,SEMA3C:NM_001350121:exon19:c.G2061T:p.R687S	.	.	.	.	.	.	.	.	.	.	.	.	.	.	.	.	.	.	.	.	.	.	.	.	.	.
54809	7q21.2	7	92732467	92732467	G	A	G>A	SAMD9	exonic	nonsynonymous SNV	DDD4K.02406	DDD_2017	28135719	4293	0	exome	Developmental Delay (DD)	psychiatric disorder	validated	.	non-ssc	.	SAMD9:NM_001193307:exon2:c.C2944T:p.R982C,SAMD9:NM_017654:exon3:c.C2944T:p.R982C	.	.	.	.	.	.	.	.	.	.	.	.	.	.	.	.	.	.	.	.	COSM5036094	1(oesophagus)	.	.	.	.
55610	7q21.3	7	92901959	92901959	G	A	G>A	VPS50	exonic	nonsynonymous SNV	DDD4K.00244	DDD_2017	28135719	4293	0	exome	Developmental Delay (DD)	psychiatric disorder	validated	.	non-ssc	.	VPS50:NM_017667:exon11:c.G715A:p.V239I,VPS50:NM_024553:exon11:c.G715A:p.V239I,VPS50:NM_001257998:exon12:c.G625A:p.V209I	.	.	.	.	.	.	2.54e-05	0.0002	0	0.0001	0	0	0	0	.	.	.	.	.	rs754664638	.	.	.	.	.	.
8910	7q21.3	7	94230134	94230134	T	G	T>G	SGCE	exonic	nonsynonymous SNV	DDD4K.03046	DDD_2017	28135719	4293	0	exome	Developmental Delay (DD)	psychiatric disorder	validated	.	non-ssc	.	SGCE:NM_001301139:exon6:c.A738C:p.E246D,SGCE:NM_001099400:exon7:c.A861C:p.E287D,SGCE:NM_001099401:exon7:c.A861C:p.E287D,SGCE:NM_001346717:exon7:c.A861C:p.E287D,SGCE:NM_003919:exon7:c.A861C:p.E287D,SGCE:NM_001346713:exon8:c.A969C:p.E323D,SGCE:NM_001346715:exon8:c.A969C:p.E323D,SGCE:NM_001346720:exon8:c.A588C:p.E196D,SGCE:NM_001346719:exon9:c.A774C:p.E258D	.	.	.	.	.	.	.	.	.	.	.	.	.	.	.	.	.	.	.	.	.	.	.	.	.	.
55607	7q21.3	7	94903256	94903256	C	T	C>T	PPP1R9A	exonic	nonsynonymous SNV	DDD4K.04244	DDD_2017	28135719	4293	0	exome	Developmental Delay (DD)	psychiatric disorder	validated	.	non-ssc	.	PPP1R9A:NM_001166161:exon13:c.C3050T:p.A1017V,PPP1R9A:NM_001166162:exon13:c.C3104T:p.A1035V,PPP1R9A:NM_001166160:exon15:c.C3170T:p.A1057V	.	.	.	.	.	.	1.18e-05	0	0	0	0	2.15e-05	0	0	0.0001	.	0.0001	.	.	rs369381828	.	.	.	.	.	.
8295	7q22.1	7	98527747	98527747	A	G	A>G	TRRAP	exonic	nonsynonymous SNV	DDD4K.03146	DDD_2017	28135719	4293	0	exome	Developmental Delay (DD)	psychiatric disorder	validated	.	non-ssc	.	TRRAP:NM_001244580:exon24:c.A3311G:p.E1104G,TRRAP:NM_003496:exon24:c.A3311G:p.E1104G	.	.	.	.	.	.	.	.	.	.	.	.	.	.	.	.	.	.	.	.	.	.	.	.	.	.
8295	7q22.1	7	98527773	98527773	G	A	G>A	TRRAP	exonic	nonsynonymous SNV	DDD4K.02859	DDD_2017	28135719	4293	0	exome	Developmental Delay (DD)	psychiatric disorder	validated	.	non-ssc	.	TRRAP:NM_001244580:exon24:c.G3337A:p.V1113M,TRRAP:NM_003496:exon24:c.G3337A:p.V1113M	.	.	.	.	.	.	.	.	.	.	.	.	.	.	.	.	.	.	.	.	.	.	.	.	.	.
8295	7q22.1	7	98545950	98545950	C	T	C>T	TRRAP	exonic	nonsynonymous SNV	DDD4K.02167	DDD_2017	28135719	4293	0	exome	Developmental Delay (DD)	psychiatric disorder	validated	.	non-ssc	.	TRRAP:NM_003496:exon32:c.C4580T:p.A1527V,TRRAP:NM_001244580:exon33:c.C4634T:p.A1545V	.	.	.	.	.	.	.	.	.	.	.	.	.	.	.	.	.	.	.	.	.	.	.	.	.	.
8295	7q22.1	7	98550943	98550943	T	A	T>A	TRRAP	exonic	nonsynonymous SNV	DDD4K.00624	DDD_2017	28135719	4293	0	exome	Developmental Delay (DD)	psychiatric disorder	validated	.	non-ssc	.	TRRAP:NM_003496:exon38:c.T5542A:p.W1848R,TRRAP:NM_001244580:exon39:c.T5596A:p.W1866R	.	.	.	.	.	.	.	.	.	.	.	.	.	.	.	.	.	.	.	.	.	.	.	.	.	.
8295	7q22.1	7	98550945	98550945	G	T	G>T	TRRAP	exonic	nonsynonymous SNV	DDD4K.00990	DDD_2017	28135719	4293	0	exome	Developmental Delay (DD)	psychiatric disorder	validated	.	non-ssc	.	TRRAP:NM_003496:exon38:c.G5544T:p.W1848C,TRRAP:NM_001244580:exon39:c.G5598T:p.W1866C	.	.	.	.	.	.	.	.	.	.	.	.	.	.	.	.	.	.	.	.	.	.	.	.	.	.
8295	7q22.1	7	98569447	98569447	C	G	C>G	TRRAP	exonic	nonsynonymous SNV	DDD4K.03071	DDD_2017	28135719	4293	0	exome	Developmental Delay (DD)	psychiatric disorder	validated	.	non-ssc	.	TRRAP:NM_003496:exon51:c.C7643G:p.A2548G,TRRAP:NM_001244580:exon52:c.C7697G:p.A2566G	.	.	.	.	.	.	.	.	.	.	.	.	.	.	.	.	.	.	.	.	.	.	.	.	.	.
8295	7q22.1	7	98592300	98592300	C	G	C>G	TRRAP	exonic	nonsynonymous SNV	DDD4K.02445	DDD_2017	28135719	4293	0	exome	Developmental Delay (DD)	psychiatric disorder	validated	.	non-ssc	.	TRRAP:NM_003496:exon65:c.C10009G:p.H3337D,TRRAP:NM_001244580:exon66:c.C10096G:p.H3366D	.	.	.	.	.	.	.	.	.	.	.	.	.	.	.	.	.	.	.	.	.	.	.	.	.	.
10898	7q22.1	7	99054258	99054258	G	A	G>A	CPSF4	exonic	nonsynonymous SNV	DDD4K.02753	DDD_2017	28135719	4293	0	exome	Developmental Delay (DD)	psychiatric disorder	validated	.	non-ssc	.	CPSF4:NM_001318161:exon7:c.G776A:p.G259D	.	.	.	.	.	.	.	.	.	.	.	.	.	.	.	.	.	.	.	.	.	.	.	.	.	.
9179	7q22.1	7	99701075	99701075	A	G	A>G	AP4M1	exonic	nonsynonymous SNV	DDD4K.01938	DDD_2017	28135719	4293	0	exome	Developmental Delay (DD)	psychiatric disorder	validated	.	non-ssc	.	AP4M1:NM_004722:exon5:c.A395G:p.N132S	.	.	.	.	.	.	.	.	.	.	.	.	.	.	.	.	.	.	.	.	COSM1183150	1(large_intestine)	.	.	.	.
51412	7q22.1	7	100244260	100244260	C	T	C>T	ACTL6B	exonic	nonsynonymous SNV	DDD4K.01336	DDD_2017	28135719	4293	0	exome	Developmental Delay (DD)	psychiatric disorder	validated	.	non-ssc	.	ACTL6B:NM_016188:exon12:c.G1027A:p.G343R	.	.	.	.	.	.	.	.	.	.	.	.	.	.	.	.	.	.	.	.	.	.	.	.	.	.
10135	7q22.3	7	105909701	105909701	T	C	T>C	NAMPT	exonic	nonsynonymous SNV	DDD4K.03899	DDD_2017	28135719	4293	0	exome	Developmental Delay (DD)	psychiatric disorder	validated	.	non-ssc	.	NAMPT:NM_005746:exon5:c.A505G:p.K169E	.	.	.	.	.	.	.	.	.	.	.	.	.	.	.	.	.	.	.	.	.	.	.	.	.	.
4233	7q31.2	7	116417455	116417455	G	A	G>A	MET	exonic	nonsynonymous SNV	DDD4K.00320	DDD_2017	28135719	4293	0	exome	Developmental Delay (DD)	psychiatric disorder	validated	.	non-ssc	.	MET:NM_001324402:exon15:c.G1982A:p.C661Y,MET:NM_000245:exon16:c.G3272A:p.C1091Y,MET:NM_001127500:exon16:c.G3326A:p.C1109Y	.	.	.	.	.	.	.	.	.	.	.	.	.	.	.	.	.	.	.	.	.	.	.	.	.	.
4233	7q31.2	7	116423476	116423476	G	T	G>T	MET	exonic	nonsynonymous SNV	DDD4K.03605	DDD_2017	28135719	4293	0	exome	Developmental Delay (DD)	psychiatric disorder	validated	.	non-ssc	.	MET:NM_001324402:exon18:c.G2461T:p.A821S,MET:NM_000245:exon19:c.G3751T:p.A1251S,MET:NM_001127500:exon19:c.G3805T:p.A1269S	.	.	.	.	.	.	.	.	.	.	.	.	.	.	.	.	.	.	.	.	.	.	.	.	.	.
64101	7q32.1	7	127668875	127668875	A	G	A>G	LRRC4	exonic	nonsynonymous SNV	DDD4K.01726	DDD_2017	28135719	4293	0	exome	Developmental Delay (DD)	psychiatric disorder	validated	.	non-ssc	.	LRRC4:NM_022143:exon2:c.T1819C:p.Y607H	.	.	.	.	.	.	8.25e-06	0	0	0	0	1.5e-05	0	0	.	.	.	.	.	rs751261425	.	.	.	.	.	.
23534	7q32.1	7	128619098	128619098	C	T	C>T	TNPO3	exonic	nonsynonymous SNV	DDD4K.02699	DDD_2017	28135719	4293	0	exome	Developmental Delay (DD)	psychiatric disorder	validated	.	non-ssc	.	TNPO3:NM_001191028:exon15:c.G1808A:p.R603H,TNPO3:NM_012470:exon16:c.G2000A:p.R667H	.	.	.	.	.	.	8.24e-06	9.64e-05	0	0	0	0	0	0	.	.	.	.	.	rs774279053	COSM1447990;COSM1447989	1(large_intestine)	.	.	.	.
673	7q34	7	140453133	140453133	T	A	T>A	BRAF	exonic	nonsynonymous SNV	DDD4K.00821	DDD_2017	28135719	4293	0	exome	Developmental Delay (DD)	psychiatric disorder	validated	.	non-ssc	.	BRAF:NM_004333:exon15:c.A1802T:p.K601I	.	.	.	.	.	.	.	.	.	.	.	.	.	.	.	.	.	.	.	rs397507484	COSM26491	3(skin)	Likely pathogenic\x2cLikely pathogenic\x2cPathogenic|Likely pathogenic|Likely pathogenic|Likely pathogenic|Likely pathogenic|Likely pathogenic|Likely pathogenic|Likely pathogenic	Rasopathy\x2cMalignant_melanoma\x2cRasopathy|Chronic_lymphocytic_leukemia|Adenocarcinoma_of_stomach|Adenocarcinoma_of_lung|Adenocarcinoma_of_prostate|Neoplasm_of_the_thyroid_gland|Malignant_melanoma_of_skin|Malignant_neoplasm_of_body_of_uterus	RCV000033336.5\x2cRCV000432349.1\x2cRCV000037939.3|RCV000417689.1|RCV000420107.1|RCV000425098.1|RCV000431024.1|RCV000434946.1|RCV000438200.1|RCV000444564.1	MedGen:Orphanet\x2cMeSH:MedGen:SNOMED_CT\x2cMedGen:Orphanet|MeSH:MedGen:OMIM:Orphanet:SNOMED_CT:SNOMED_CT|MedGen|MeSH:MedGen|MedGen|MeSH:MedGen|MeSH:MedGen:SNOMED_CT|MedGen
673	7q34	7	140476811	140476811	C	T	C>T	BRAF	exonic	nonsynonymous SNV	DDD4K.03383	DDD_2017	28135719	4293	0	exome	Developmental Delay (DD)	psychiatric disorder	validated	.	non-ssc	.	BRAF:NM_004333:exon13:c.G1595A:p.C532Y	.	.	.	.	.	.	.	.	.	.	.	.	.	.	.	.	.	.	.	rs397507479	.	.	Likely pathogenic|Pathogenic|Uncertain significance	not_provided|Cardio-facio-cutaneous_syndrome|not_specified	RCV000080902.6|RCV000150205.2|RCV000259083.1	MedGen|MedGen:Orphanet:SNOMED_CT|MedGen
8972	7q34	7	141722181	141722181	G	A	G>A	MGAM	exonic	nonsynonymous SNV	DDD4K.01420	DDD_2017	28135719	4293	0	exome	Developmental Delay (DD)	psychiatric disorder	validated	.	non-ssc	.	MGAM:NM_004668:exon7:c.G824A:p.R275Q	.	.	.	.	.	.	.	.	.	.	.	.	.	.	.	.	.	.	.	.	.	.	.	.	.	.
135935	7q35	7	144096931	144096931	T	C	T>C	NOBOX	exonic	nonsynonymous SNV	DDD4K.00633	DDD_2017	28135719	4293	0	exome	Developmental Delay (DD)	psychiatric disorder	validated	.	non-ssc	.	NOBOX:NM_001080413:exon6:c.A1073G:p.K358R	.	.	.	.	.	.	.	.	.	.	.	.	.	.	.	.	.	.	.	.	.	.	.	.	.	.
2146	7q36.1	7	148506461	148506461	C	T	C>T	EZH2	exonic	nonsynonymous SNV	DDD4K.00222	DDD_2017	28135719	4293	0	exome	Developmental Delay (DD)	psychiatric disorder	validated	.	non-ssc	.	EZH2:NM_001203249:exon17:c.G1883A:p.R628H,EZH2:NM_152998:exon17:c.G1919A:p.R640H,EZH2:NM_001203247:exon18:c.G2036A:p.R679H,EZH2:NM_001203248:exon18:c.G2009A:p.R670H,EZH2:NM_004456:exon18:c.G2051A:p.R684H	.	.	.	.	.	.	.	.	.	.	.	.	.	.	.	.	.	.	.	.	COSM306072;COSM306073	8(haematopoietic_and_lymphoid_tissue);1(large_intestine)	.	.	.	.
168544	7q36.1	7	149462931	149462931	C	G	C>G	ZNF467	exonic	nonsynonymous SNV	DDD4K.01080	DDD_2017	28135719	4293	0	exome	Developmental Delay (DD)	psychiatric disorder	validated	.	non-ssc	.	ZNF467:NM_207336:exon5:c.G660C:p.E220D	.	.	.	.	.	.	.	.	.	.	.	.	.	.	.	.	.	.	.	.	.	.	.	.	.	.
58508	7q36.1	7	151848074	151848074	T	C	T>C	KMT2C	exonic	nonsynonymous SNV	DDD4K.00159	DDD_2017	28135719	4293	0	exome	Developmental Delay (DD)	psychiatric disorder	validated	.	non-ssc	.	KMT2C:NM_170606:exon51:c.A12685G:p.K4229E	.	.	.	.	.	.	.	.	.	.	.	.	.	.	.	.	.	.	.	.	.	.	.	.	.	.
155435	7q36.3	7	155559194	155559194	G	A	G>A	RBM33	exonic	nonsynonymous SNV	DDD4K.03585	DDD_2017	28135719	4293	0	exome	Developmental Delay (DD)	psychiatric disorder	validated	.	non-ssc	.	RBM33:NM_053043:exon16:c.G3220A:p.G1074S	0.0002	.	.	.	.	0.001	1.7e-05	0	0	0	0	1.54e-05	0	6.21e-05	.	.	.	.	.	rs553761355	.	.	.	.	.	.
55112	7q36.3	7	158698761	158698761	G	A	G>A	WDR60	exonic	nonsynonymous SNV	DDD4K.03283	DDD_2017	28135719	4293	0	exome	Developmental Delay (DD)	psychiatric disorder	validated	.	non-ssc	.	WDR60:NM_001350915:exon10:c.G866A:p.R289Q,WDR60:NM_001350914:exon11:c.G1301A:p.R434Q,WDR60:NM_018051:exon11:c.G1439A:p.R480Q,WDR60:NM_001350917:exon12:c.G191A:p.R64Q,WDR60:NM_001350918:exon13:c.G191A:p.R64Q	.	.	.	.	.	.	8.49e-06	0.0001	0	0	0	0	0	0	.	.	.	.	.	rs757765020	.	.	.	.	.	.
1508	8p23.1	8	11710960	11710960	A	T	A>T	CTSB	exonic	nonsynonymous SNV	DDD4K.00255	DDD_2017	28135719	4293	0	exome	Developmental Delay (DD)	psychiatric disorder	validated	.	non-ssc	.	CTSB:NM_001908:exon2:c.T4A:p.W2R,CTSB:NM_147781:exon3:c.T4A:p.W2R,CTSB:NM_147782:exon3:c.T4A:p.W2R,CTSB:NM_147783:exon3:c.T4A:p.W2R,CTSB:NM_147780:exon4:c.T4A:p.W2R	.	.	.	.	.	.	.	.	.	.	.	.	.	.	.	.	.	.	.	.	.	.	.	.	.	.
55174	8p21.3	8	19677166	19677166	A	C	A>C	INTS10	exonic	nonsynonymous SNV	DDD4K.00234	DDD_2017	28135719	4293	0	exome	Developmental Delay (DD)	psychiatric disorder	validated	.	non-ssc	.	INTS10:NM_018142:exon3:c.A280C:p.K94Q	.	.	.	.	.	.	.	.	.	.	.	.	.	.	.	.	.	.	.	.	.	.	.	.	.	.
526	8p21.3	8	20072387	20072387	C	G	C>G	ATP6V1B2	exonic	nonsynonymous SNV	DDD4K.02387	DDD_2017	28135719	4293	0	exome	Developmental Delay (DD)	psychiatric disorder	validated	.	non-ssc	.	ATP6V1B2:NM_001693:exon10:c.C986G:p.T329R	.	.	.	.	.	.	.	.	.	.	.	.	.	.	.	.	.	.	.	.	.	.	.	.	.	.
157310	8p21.3	8	22675247	22675247	C	T	C>T	PEBP4	exonic	nonsynonymous SNV	DDD4K.03885	DDD_2017	28135719	4293	0	exome	Developmental Delay (DD)	psychiatric disorder	validated	.	non-ssc	.	PEBP4:NM_144962:exon4:c.G260A:p.G87D	.	.	.	.	.	.	.	.	.	.	.	.	.	.	.	.	.	.	.	.	COSM1456133	1(large_intestine)	.	.	.	.
23221	8p21.3	8	22865113	22865113	C	G	C>G	RHOBTB2	exonic	nonsynonymous SNV	DDD4K.02744	DDD_2017	28135719	4293	0	exome	Developmental Delay (DD)	psychiatric disorder	validated	.	non-ssc	.	RHOBTB2:NM_001160037:exon5:c.C1376G:p.A459G,RHOBTB2:NM_015178:exon5:c.C1355G:p.A452G,RHOBTB2:NM_001160036:exon7:c.C1421G:p.A474G	.	.	.	.	.	.	.	.	.	.	.	.	.	.	.	.	.	.	.	.	.	.	.	.	.	.
157574	8p21.1	8	28321303	28321303	T	A	T>A	FBXO16	exonic	nonsynonymous SNV	DDD4K.02140	DDD_2017	28135719	4293	0	exome	Developmental Delay (DD)	psychiatric disorder	validated	.	non-ssc	.	FBXO16:NM_001258211:exon3:c.A132T:p.R44S,FBXO16:NM_172366:exon4:c.A168T:p.R56S	.	.	.	.	.	.	.	.	.	.	.	.	.	.	.	.	.	.	.	.	.	.	.	.	.	.
7486	8p12	8	31004963	31004963	C	A	C>A	WRN	exonic	nonsynonymous SNV	DDD4K.00374	DDD_2017	28135719	4293	0	exome	Developmental Delay (DD)	psychiatric disorder	validated	.	non-ssc	.	WRN:NM_000553:exon30:c.C3543A:p.N1181K	.	.	.	.	.	.	.	.	.	.	.	.	.	.	.	.	.	.	.	.	.	.	.	.	.	.
7994	8p11.21	8	41790166	41790166	G	A	G>A	KAT6A	exonic	nonsynonymous SNV	DDD4K.02003	DDD_2017	28135719	4293	0	exome	Developmental Delay (DD)	psychiatric disorder	validated	.	non-ssc	.	KAT6A:NM_006766:exon17:c.C5572T:p.R1858C	0.0002	.	0.0014	.	.	.	4.13e-05	0	8.67e-05	0	0.0005	1.5e-05	0	0	0.0001	.	0.0001	.	.	rs374807145	COSM2961658	1(stomach)	.	.	.	.
6101	8q12.1	8	55533851	55533851	G	C	G>C	RP1	exonic	nonsynonymous SNV	DDD4K.00124	DDD_2017	28135719	4293	0	exome	Developmental Delay (DD)	psychiatric disorder	validated	.	non-ssc	.	RP1:NM_006269:exon2:c.G325C:p.G109R	.	.	.	.	.	.	.	.	.	.	.	.	.	.	.	.	.	.	.	.	.	.	.	.	.	.
5862	8q12.1	8	61504490	61504490	A	G	A>G	RAB2A	exonic	nonsynonymous SNV	DDD4K.02618	DDD_2017	28135719	4293	0	exome	Developmental Delay (DD)	psychiatric disorder	validated	.	non-ssc	.	RAB2A:NM_001242644:exon5:c.A364G:p.M122V,RAB2A:NM_002865:exon6:c.A436G:p.M146V	.	.	.	.	.	.	.	.	.	.	.	.	.	.	.	.	.	.	.	.	.	.	.	.	.	.
55636	8q12.2	8	61655388	61655388	C	T	C>T	CHD7	exonic	nonsynonymous SNV	DDD4K.01737	DDD_2017	28135719	4293	0	exome	Developmental Delay (DD)	psychiatric disorder	validated	.	non-ssc	.	CHD7:NM_001316690:exon1:c.C1397T:p.S466L,CHD7:NM_017780:exon2:c.C1397T:p.S466L	0.0004	.	.	.	0.002	.	0.0012	0.0005	0.0003	0	0.0002	0.002	0.0012	6.28e-05	0.001	0.0002	0.0013	.	.	rs71640285	.	.	Likely benign	not_specified	RCV000247781.2	MedGen
55636	8q12.2	8	61732609	61732609	G	A	G>A	CHD7	exonic	nonsynonymous SNV	DDD4K.03460	DDD_2017	28135719	4293	0	exome	Developmental Delay (DD)	psychiatric disorder	validated	.	non-ssc	.	CHD7:NM_017780:exon9:c.G2657A:p.R886Q	.	.	.	.	.	.	.	.	.	.	.	.	.	.	.	.	.	.	.	.	COSM3650069	1(skin)	.	.	.	.
10565	8q13.2	8	68140272	68140272	A	G	A>G	ARFGEF1	exonic	nonsynonymous SNV	DDD4K.02432	DDD_2017	28135719	4293	0	exome	Developmental Delay (DD)	psychiatric disorder	validated	.	non-ssc	.	ARFGEF1:NM_006421:exon25:c.T3517C:p.S1173P	.	.	.	.	.	.	.	.	.	.	.	.	.	.	.	.	.	.	.	.	.	.	.	.	.	.
93035	8q23.1	8	110394735	110394735	G	A	G>A	PKHD1L1	exonic	nonsynonymous SNV	DDD4K.01396	DDD_2017	28135719	4293	0	exome	Developmental Delay (DD)	psychiatric disorder	validated	.	non-ssc	.	PKHD1L1:NM_177531:exon4:c.G352A:p.G118R	.	.	.	.	.	.	2.49e-05	0.0002	0	0	0	1.5e-05	0	0	0.0001	0.0003	.	.	.	rs371453637	.	.	.	.	.	.
3786	8q24.22	8	133150175	133150175	C	T	C>T	KCNQ3	exonic	nonsynonymous SNV	DDD4K.00501	DDD_2017	28135719	4293	0	exome	Developmental Delay (DD)	psychiatric disorder	validated	.	non-ssc	.	KCNQ3:NM_001204824:exon12:c.G1297A:p.G433R,KCNQ3:NM_004519:exon12:c.G1657A:p.G553R	.	.	.	.	.	.	.	.	.	.	.	.	.	.	.	.	.	.	.	.	COSM3896832	1(stomach)	.	.	.	.
3786	8q24.22	8	133184919	133184919	C	T	C>T	KCNQ3	exonic	nonsynonymous SNV	DDD4K.02558	DDD_2017	28135719	4293	0	exome	Developmental Delay (DD)	psychiatric disorder	validated	.	non-ssc	.	KCNQ3:NM_001204824:exon7:c.G706A:p.A236T,KCNQ3:NM_004519:exon7:c.G1066A:p.A356T	.	.	.	.	.	.	.	.	.	.	.	.	.	.	.	.	.	.	.	.	.	.	.	.	.	.
3786	8q24.22	8	133192493	133192493	G	A	G>A	KCNQ3	exonic	nonsynonymous SNV	DDD4K.02529	DDD_2017	28135719	4293	0	exome	Developmental Delay (DD)	psychiatric disorder	validated	.	non-ssc	.	KCNQ3:NM_001204824:exon4:c.C328T:p.R110C,KCNQ3:NM_004519:exon4:c.C688T:p.R230C	.	.	.	.	.	.	.	.	.	.	.	.	.	.	.	.	.	.	.	rs796052676	COSM3317776	1(oesophagus)	Pathogenic|Likely pathogenic	not_provided|Benign_familial_neonatal_seizures_2	RCV000187968.2|RCV000210407.1	MedGen|MedGen:OMIM
3786	8q24.22	8	133192501	133192501	C	T	C>T	KCNQ3	exonic	nonsynonymous SNV	DDD4K.01169	DDD_2017	28135719	4293	0	exome	Developmental Delay (DD)	psychiatric disorder	validated	.	non-ssc	.	KCNQ3:NM_001204824:exon4:c.G320A:p.R107Q,KCNQ3:NM_004519:exon4:c.G680A:p.R227Q	.	.	.	.	.	.	.	.	.	.	.	.	.	.	.	.	.	.	0.0082	.	COSM1569191	2(skin);3(large_intestine)	.	.	.	.
137797	8q24.3	8	143833859	143833859	G	A	G>A	LYPD2	exonic	nonsynonymous SNV	DDD4K.00310	DDD_2017	28135719	4293	0	exome	Developmental Delay (DD)	psychiatric disorder	validated	.	non-ssc	.	LYPD2:NM_205545:exon1:c.C11T:p.T4M	.	.	.	.	.	.	8.43e-06	0.0001	0	0	0	0	0	0	0.0002	0.0005	.	.	.	rs377300661	COSM3897325	1(stomach)	.	.	.	.
286077	8q24.3	8	144811361	144811361	C	T	C>T	FAM83H	exonic	nonsynonymous SNV	DDD4K.00143	DDD_2017	28135719	4293	0	exome	Developmental Delay (DD)	psychiatric disorder	validated	.	non-ssc	.	FAM83H:NM_198488:exon3:c.G580A:p.D194N	0.0002	.	.	.	.	0.001	0.0002	0	8.64e-05	0	0	6.02e-05	0	0.0013	.	.	.	.	.	rs573911470	.	.	.	.	.	.
22827	8q24.3	8	144898898	144898898	C	T	C>T	PUF60	exonic	nonsynonymous SNV	DDD4K.03831	DDD_2017	28135719	4293	0	exome	Developmental Delay (DD)	psychiatric disorder	validated	.	non-ssc	.	PUF60:NM_001271097:exon10:c.G1334A:p.G445E,PUF60:NM_001271096:exon11:c.G1418A:p.G473E,PUF60:NM_001271099:exon11:c.G1385A:p.G462E,PUF60:NM_001271100:exon11:c.G1292A:p.G431E,PUF60:NM_014281:exon11:c.G1421A:p.G474E,PUF60:NM_001136033:exon12:c.G1343A:p.G448E,PUF60:NM_001271098:exon12:c.G1469A:p.G490E,PUF60:NM_078480:exon12:c.G1472A:p.G491E	.	.	.	.	.	.	.	.	.	.	.	.	.	.	.	.	.	.	.	.	.	.	.	.	.	.
22827	8q24.3	8	144900425	144900425	C	T	C>T	PUF60	exonic	nonsynonymous SNV	DDD4K.00020	DDD_2017	28135719	4293	0	exome	Developmental Delay (DD)	psychiatric disorder	validated	.	non-ssc	.	PUF60:NM_001271097:exon5:c.G403A:p.E135K,PUF60:NM_001271096:exon6:c.G487A:p.E163K,PUF60:NM_001271099:exon6:c.G454A:p.E152K,PUF60:NM_001271100:exon6:c.G361A:p.E121K,PUF60:NM_014281:exon6:c.G490A:p.E164K,PUF60:NM_001136033:exon7:c.G412A:p.E138K,PUF60:NM_001271098:exon7:c.G538A:p.E180K,PUF60:NM_078480:exon7:c.G541A:p.E181K	.	.	.	.	.	.	.	.	.	.	.	.	.	.	.	.	.	.	.	.	.	.	.	.	.	.
22827	8q24.3	8	144900578	144900578	C	T	C>T	PUF60	exonic	nonsynonymous SNV	DDD4K.03612	DDD_2017	28135719	4293	0	exome	Developmental Delay (DD)	psychiatric disorder	validated	.	non-ssc	.	PUF60:NM_001271097:exon4:c.G337A:p.D113N,PUF60:NM_001271096:exon5:c.G421A:p.D141N,PUF60:NM_001271099:exon5:c.G388A:p.D130N,PUF60:NM_001271100:exon5:c.G295A:p.D99N,PUF60:NM_014281:exon5:c.G424A:p.D142N,PUF60:NM_001136033:exon6:c.G346A:p.D116N,PUF60:NM_001271098:exon6:c.G472A:p.D158N,PUF60:NM_078480:exon6:c.G475A:p.D159N	.	.	.	.	.	.	.	.	.	.	.	.	.	.	.	.	.	.	.	.	.	.	.	.	.	.
83481	8q24.3	8	144946595	144946595	T	G	T>G	EPPK1	exonic	nonsynonymous SNV	DDD4K.03703	DDD_2017	28135719	4293	0	exome	Developmental Delay (DD)	psychiatric disorder	validated	.	non-ssc	.	EPPK1:NM_031308:exon2:c.A827C:p.E276A	.	.	.	.	.	.	.	.	.	.	.	.	.	.	.	.	.	.	.	.	.	.	.	.	.	.
5339	8q24.3	8	144992309	144992309	T	C	T>C	PLEC	exonic	nonsynonymous SNV	DDD4K.01194	DDD_2017	28135719	4293	0	exome	Developmental Delay (DD)	psychiatric disorder	validated	.	non-ssc	.	PLEC:NM_201378:exon32:c.A11638G:p.M3880V,PLEC:NM_201379:exon32:c.A11614G:p.M3872V,PLEC:NM_201380:exon32:c.A12091G:p.M4031V,PLEC:NM_201381:exon32:c.A11584G:p.M3862V,PLEC:NM_201382:exon32:c.A11680G:p.M3894V,PLEC:NM_201383:exon32:c.A11692G:p.M3898V,PLEC:NM_201384:exon32:c.A11680G:p.M3894V,PLEC:NM_000445:exon33:c.A11761G:p.M3921V	.	.	.	.	.	.	1.04e-05	0	0	0	0	0	0	6.73e-05	.	.	.	.	.	rs781993724	.	.	.	.	.	.
203054	8q24.3	8	145603166	145603166	G	A	G>A	ADCK5	exonic	nonsynonymous SNV	DDD4K.01629	DDD_2017	28135719	4293	0	exome	Developmental Delay (DD)	psychiatric disorder	validated	.	non-ssc	.	ADCK5:NM_174922:exon2:c.G103A:p.G35S	.	.	.	.	.	.	9.63e-06	0.0001	0	0	0	0	0	0	0.0001	0.0002	.	.	.	rs369601211	.	.	.	.	.	.
7553	8q24.3	8	146068429	146068429	G	A	G>A	ZNF7	exonic	nonsynonymous SNV	DDD4K.03206	DDD_2017	28135719	4293	0	exome	Developmental Delay (DD)	psychiatric disorder	validated	.	non-ssc	.	ZNF7:NM_001349805:exon3:c.G1649A:p.R550H,ZNF7:NM_001282797:exon4:c.G1649A:p.R550H,ZNF7:NM_001349809:exon4:c.G2000A:p.R667H,ZNF7:NM_001282795:exon5:c.G1970A:p.R657H,ZNF7:NM_001349806:exon5:c.G1988A:p.R663H,ZNF7:NM_001349807:exon5:c.G1934A:p.R645H,ZNF7:NM_001349808:exon5:c.G1985A:p.R662H,ZNF7:NM_003416:exon5:c.G1937A:p.R646H	.	.	.	.	.	.	0.0001	0.0003	0.0002	0.0001	0	8.99e-05	0	0.0002	0.0002	0.0005	0.0001	.	.	rs149536664	.	.	.	.	.	.
7553	8q24.3	8	146068473	146068473	C	G	C>G	ZNF7	exonic	nonsynonymous SNV	DDD4K.03237	DDD_2017	28135719	4293	0	exome	Developmental Delay (DD)	psychiatric disorder	validated	.	non-ssc	.	ZNF7:NM_001349805:exon3:c.C1693G:p.P565A,ZNF7:NM_001282797:exon4:c.C1693G:p.P565A,ZNF7:NM_001349809:exon4:c.C2044G:p.P682A,ZNF7:NM_001282795:exon5:c.C2014G:p.P672A,ZNF7:NM_001349806:exon5:c.C2032G:p.P678A,ZNF7:NM_001349807:exon5:c.C1978G:p.P660A,ZNF7:NM_001349808:exon5:c.C2029G:p.P677A,ZNF7:NM_003416:exon5:c.C1981G:p.P661A	.	.	.	.	.	.	.	.	.	.	.	.	.	.	.	.	.	.	.	.	.	.	.	.	.	.
58524	9p24.3	9	990886	990886	C	T	C>T	DMRT3	exonic	nonsynonymous SNV	DDD4K.01068	DDD_2017	28135719	4293	0	exome	Developmental Delay (DD)	psychiatric disorder	validated	.	non-ssc	.	DMRT3:NM_021240:exon2:c.C1300T:p.R434W	.	.	.	.	.	.	.	.	.	.	.	.	.	.	.	.	.	.	.	.	COSM3780238	1(urinary_tract);1(skin)	.	.	.	.
6595	9p24.3	9	2058457	2058457	G	A	G>A	SMARCA2	exonic	nonsynonymous SNV	DDD4K.01420	DDD_2017	28135719	4293	0	exome	Developmental Delay (DD)	psychiatric disorder	validated	.	non-ssc	.	SMARCA2:NM_001289396:exon8:c.G1514A:p.R505Q,SMARCA2:NM_001289397:exon8:c.G1514A:p.R505Q,SMARCA2:NM_003070:exon8:c.G1514A:p.R505Q,SMARCA2:NM_139045:exon8:c.G1514A:p.R505Q	.	.	.	.	.	.	.	.	.	.	.	.	.	.	.	.	.	.	.	.	.	.	.	.	.	.
6595	9p24.3	9	2060867	2060867	C	T	C>T	SMARCA2	exonic	nonsynonymous SNV	DDD4K.03323	DDD_2017	28135719	4293	0	exome	Developmental Delay (DD)	psychiatric disorder	validated	.	non-ssc	.	SMARCA2:NM_001289396:exon9:c.C1573T:p.R525C,SMARCA2:NM_001289397:exon9:c.C1573T:p.R525C,SMARCA2:NM_003070:exon9:c.C1573T:p.R525C,SMARCA2:NM_139045:exon9:c.C1573T:p.R525C	.	.	.	.	.	.	.	.	.	.	.	.	.	.	.	.	.	.	.	.	COSM3091667;COSM3091666	1(bone)	.	.	.	.
6595	9p24.3	9	2060868	2060868	G	A	G>A	SMARCA2	exonic	nonsynonymous SNV	DDD4K.03070	DDD_2017	28135719	4293	0	exome	Developmental Delay (DD)	psychiatric disorder	validated	.	non-ssc	.	SMARCA2:NM_001289396:exon9:c.G1574A:p.R525H,SMARCA2:NM_001289397:exon9:c.G1574A:p.R525H,SMARCA2:NM_003070:exon9:c.G1574A:p.R525H,SMARCA2:NM_139045:exon9:c.G1574A:p.R525H	.	.	.	.	.	.	.	.	.	.	.	.	.	.	.	.	.	.	.	.	.	.	.	.	.	.
6595	9p24.3	9	2123728	2123728	A	G	A>G	SMARCA2	exonic	nonsynonymous SNV	DDD4K.01772	DDD_2017	28135719	4293	0	exome	Developmental Delay (DD)	psychiatric disorder	validated	.	non-ssc	.	SMARCA2:NM_001289396:exon27:c.A3772G:p.M1258V,SMARCA2:NM_001289397:exon27:c.A3598G:p.M1200V,SMARCA2:NM_003070:exon27:c.A3772G:p.M1258V,SMARCA2:NM_139045:exon27:c.A3772G:p.M1258V	.	.	.	.	.	.	.	.	.	.	.	.	.	.	.	.	.	.	.	.	.	.	.	.	.	.
6595	9p24.3	9	2181575	2181575	G	A	G>A	SMARCA2	exonic	nonsynonymous SNV	DDD4K.02167	DDD_2017	28135719	4293	0	exome	Developmental Delay (DD)	psychiatric disorder	validated	.	non-ssc	.	SMARCA2:NM_001289398:exon3:c.G232A:p.G78R,SMARCA2:NM_001289399:exon4:c.G316A:p.G106R,SMARCA2:NM_001289400:exon4:c.G322A:p.G108R,SMARCA2:NM_001289397:exon29:c.G4030A:p.G1344R,SMARCA2:NM_139045:exon29:c.G4204A:p.G1402R,SMARCA2:NM_001289396:exon30:c.G4258A:p.G1420R,SMARCA2:NM_003070:exon30:c.G4258A:p.G1420R	.	.	.	.	.	.	.	.	.	.	.	.	.	.	.	.	.	.	.	.	.	.	.	.	.	.
29126	9p24.1	9	5463029	5463029	T	C	T>C	CD274	exonic	nonsynonymous SNV	DDD4K.02679	DDD_2017	28135719	4293	0	exome	Developmental Delay (DD)	psychiatric disorder	validated	.	non-ssc	.	CD274:NM_001267706:exon3:c.T248C:p.L83P,CD274:NM_001314029:exon4:c.T590C:p.L197P,CD274:NM_014143:exon4:c.T590C:p.L197P	.	.	.	.	.	.	.	.	.	.	.	.	.	.	.	.	.	.	.	.	.	.	.	.	.	.
158358	9p24.1	9	5920441	5920441	G	A	G>A	KIAA2026	exonic	nonsynonymous SNV	DDD4K.00064	DDD_2017	28135719	4293	0	exome	Developmental Delay (DD)	psychiatric disorder	validated	.	non-ssc	.	KIAA2026:NM_001017969:exon8:c.C5555T:p.T1852M	.	.	.	.	.	.	4.97e-05	0.0001	0	0	0	4.5e-05	0	0.0001	0.0001	.	0.0001	.	.	rs371721207	.	.	.	.	.	.
8777	9p23	9	13216817	13216817	C	T	C>T	MPDZ	exonic	nonsynonymous SNV	DDD4K.00257	DDD_2017	28135719	4293	0	exome	Developmental Delay (DD)	psychiatric disorder	validated	.	non-ssc	.	MPDZ:NM_001261406:exon10:c.G1246A:p.V416I,MPDZ:NM_001261407:exon10:c.G1246A:p.V416I,MPDZ:NM_001330637:exon10:c.G1246A:p.V416I,MPDZ:NM_003829:exon10:c.G1246A:p.V416I	.	.	.	.	.	.	1.73e-05	0	9.16e-05	0.0001	0	0	0	0	.	.	.	.	.	rs753084316	.	.	.	.	.	.
158219	9p22.3	9	15175034	15175034	C	A	C>A	TTC39B	exonic	nonsynonymous SNV	DDD4K.02046	DDD_2017	28135719	4293	0	exome	Developmental Delay (DD)	psychiatric disorder	validated	.	non-ssc	.	TTC39B:NM_001168341:exon17:c.G1734T:p.K578N,TTC39B:NM_001168342:exon17:c.G1446T:p.K482N,TTC39B:NM_001168340:exon18:c.G1902T:p.K634N,TTC39B:NM_001168339:exon19:c.G1935T:p.K645N,TTC39B:NM_152574:exon19:c.G1941T:p.K647N	.	.	.	.	.	.	6.59e-05	0	0	0	0	0.0001	0	0	.	.	.	.	.	rs376886769	.	.	.	.	.	.
92949	9p22.1	9	18777460	18777460	T	C	T>C	ADAMTSL1	exonic	nonsynonymous SNV	DDD4K.02699	DDD_2017	28135719	4293	0	exome	Developmental Delay (DD)	psychiatric disorder	validated	.	non-ssc	.	ADAMTSL1:NM_001040272:exon19:c.T3233C:p.L1078P	.	.	.	.	.	.	.	.	.	.	.	.	.	.	.	.	.	.	.	.	.	.	.	.	.	.
100129669	9p21.3	9	24544986	24544986	C	A	C>A	IZUMO3	exonic	nonsynonymous SNV	DDD4K.00344	DDD_2017	28135719	4293	0	exome	Developmental Delay (DD)	psychiatric disorder	validated	.	non-ssc	.	IZUMO3:NM_001271706:exon3:c.G375T:p.K125N	.	.	.	.	.	.	.	.	.	.	.	.	.	.	.	.	.	.	.	rs534263289	.	.	.	.	.	.
55234	9p21.1	9	33076587	33076587	G	A	G>A	SMU1	exonic	nonsynonymous SNV	DDD4K.02878	DDD_2017	28135719	4293	0	exome	Developmental Delay (DD)	psychiatric disorder	validated	.	non-ssc	.	SMU1:NM_018225:exon1:c.C20T:p.S7F	.	.	.	.	.	.	.	.	.	.	.	.	.	.	.	.	.	.	.	.	.	.	.	.	.	.
22844	9p13.2	9	37746434	37746434	C	T	C>T	FRMPD1	exonic	nonsynonymous SNV	DDD4K.01861	DDD_2017	28135719	4293	0	exome	Developmental Delay (DD)	psychiatric disorder	validated	.	non-ssc	.	FRMPD1:NM_014907:exon16:c.C4405T:p.L1469F	.	.	.	.	.	.	.	.	.	.	.	.	.	.	.	.	.	.	.	.	.	.	.	.	.	.
219	9p13.2	9	38395753	38395753	G	A	G>A	ALDH1B1	exonic	nonsynonymous SNV	DDD4K.00496	DDD_2017	28135719	4293	0	exome	Developmental Delay (DD)	psychiatric disorder	validated	.	non-ssc	.	ALDH1B1:NM_000692:exon2:c.G8A:p.R3H	.	.	.	.	.	.	3.57e-05	0	8.7e-05	0	0	1.56e-05	0	0.0002	.	.	.	.	.	rs775731660	COSM1109111	2(large_intestine);2(endometrium)	.	.	.	.
158471	9q21.2	9	79324987	79324987	C	T	C>T	PRUNE2	exonic	nonsynonymous SNV	DDD4K.02829	DDD_2017	28135719	4293	0	exome	Developmental Delay (DD)	psychiatric disorder	validated	.	non-ssc	.	PRUNE2:NM_001308047:exon8:c.G2203A:p.E735K,PRUNE2:NM_001308048:exon8:c.G2203A:p.E735K,PRUNE2:NM_015225:exon8:c.G2203A:p.E735K	.	.	.	.	.	.	4.18e-05	0.0001	0	0	0	0	0	0.0002	0.0001	0.0003	.	.	.	rs372681786	.	.	.	.	.	.
29968	9q21.2	9	80923396	80923396	C	T	C>T	PSAT1	exonic	nonsynonymous SNV	DDD4K.03775	DDD_2017	28135719	4293	0	exome	Developmental Delay (DD)	psychiatric disorder	validated	.	non-ssc	.	PSAT1:NM_021154:exon6:c.C637T:p.R213C,PSAT1:NM_058179:exon6:c.C637T:p.R213C	.	.	.	.	.	.	4.94e-05	0	8.64e-05	0	0	7.49e-05	0	0	.	.	.	.	.	rs774223780	.	.	.	.	.	.
158158	9q21.32	9	85615352	85615352	G	C	G>C	RASEF	exonic	nonsynonymous SNV	DDD4K.03571	DDD_2017	28135719	4293	0	exome	Developmental Delay (DD)	psychiatric disorder	validated	.	non-ssc	.	RASEF:NM_152573:exon11:c.C1571G:p.P524R	.	.	.	.	.	.	.	.	.	.	.	.	.	.	.	.	.	.	.	.	.	.	.	.	.	.
3190	9q21.32	9	86591947	86591947	C	T	C>T	HNRNPK	exonic	nonsynonymous SNV	DDD4K.01543	DDD_2017	28135719	4293	0	exome	Developmental Delay (DD)	psychiatric disorder	validated	.	non-ssc	.	HNRNPK:NM_001318186:exon5:c.G176A:p.G59E,HNRNPK:NM_001318187:exon5:c.G176A:p.G59E,HNRNPK:NM_001318188:exon5:c.G176A:p.G59E,HNRNPK:NM_002140:exon5:c.G176A:p.G59E,HNRNPK:NM_031262:exon5:c.G176A:p.G59E,HNRNPK:NM_031263:exon5:c.G176A:p.G59E	.	.	.	.	.	.	.	.	.	.	.	.	.	.	.	.	.	.	.	.	.	.	.	.	.	.
10927	9q22.1	9	91083440	91083440	A	G	A>G	SPIN1	exonic	nonsynonymous SNV	DDD4K.00530	DDD_2017	28135719	4293	0	exome	Developmental Delay (DD)	psychiatric disorder	validated	.	non-ssc	.	SPIN1:NM_006717:exon5:c.A509G:p.Y170C	.	.	.	.	.	.	.	.	.	.	.	.	.	.	.	.	.	.	.	.	.	.	.	.	.	.
5727	9q22.32	9	98241382	98241382	A	C	A>C	PTCH1	exonic	nonsynonymous SNV	DDD4K.00301	DDD_2017	28135719	4293	0	exome	Developmental Delay (DD)	psychiatric disorder	validated	.	non-ssc	.	PTCH1:NM_000264:exon8:c.T1115G:p.M372R,PTCH1:NM_001083602:exon8:c.T917G:p.M306R,PTCH1:NM_001083603:exon8:c.T1112G:p.M371R,PTCH1:NM_001083604:exon8:c.T662G:p.M221R,PTCH1:NM_001083605:exon8:c.T662G:p.M221R,PTCH1:NM_001083606:exon8:c.T662G:p.M221R,PTCH1:NM_001083607:exon8:c.T662G:p.M221R	.	.	.	.	.	.	.	.	.	.	.	.	.	.	.	.	.	.	.	.	.	.	.	.	.	.
9568	9q22.33	9	101133817	101133817	C	T	C>T	GABBR2	exonic	nonsynonymous SNV	DDD4K.00923	DDD_2017	28135719	4293	0	exome	Developmental Delay (DD)	psychiatric disorder	validated	.	non-ssc	.	GABBR2:NM_005458:exon12:c.G1699A:p.A567T	.	.	.	.	.	.	.	.	.	.	.	.	.	.	.	.	.	.	.	.	.	.	.	.	.	.
9568	9q22.33	9	101133817	101133817	C	T	C>T	GABBR2	exonic	nonsynonymous SNV	DDD4K.03084	DDD_2017	28135719	4293	0	exome	Developmental Delay (DD)	psychiatric disorder	validated	.	non-ssc	.	GABBR2:NM_005458:exon12:c.G1699A:p.A567T	.	.	.	.	.	.	.	.	.	.	.	.	.	.	.	.	.	.	.	.	.	.	.	.	.	.
9568	9q22.33	9	101216318	101216318	G	A	G>A	GABBR2	exonic	nonsynonymous SNV	DDD4K.02301	DDD_2017	28135719	4293	0	exome	Developmental Delay (DD)	psychiatric disorder	validated	.	non-ssc	.	GABBR2:NM_005458:exon7:c.C1181T:p.T394M	.	.	.	.	.	.	4.12e-05	0	0	0	0	7.49e-05	0	0	0.0001	.	0.0001	.	.	rs76761930	.	.	.	.	.	.
19	9q31.1	9	107583669	107583669	C	T	C>T	ABCA1	exonic	nonsynonymous SNV	DDD4K.00602	DDD_2017	28135719	4293	0	exome	Developmental Delay (DD)	psychiatric disorder	validated	.	non-ssc	.	ABCA1:NM_005502:exon20:c.G2947A:p.V983M	.	.	.	.	.	.	.	.	.	.	.	.	.	.	.	.	.	.	.	.	.	.	.	.	.	.
79987	9q31.3	9	113163159	113163159	T	A	T>A	SVEP1	exonic	nonsynonymous SNV	DDD4K.03977	DDD_2017	28135719	4293	0	exome	Developmental Delay (DD)	psychiatric disorder	validated	.	non-ssc	.	SVEP1:NM_153366:exon40:c.A9797T:p.Q3266L	.	.	.	.	.	.	.	.	.	.	.	.	.	.	.	.	.	.	.	.	.	.	.	.	.	.
79987	9q31.3	9	113169644	113169644	C	T	C>T	SVEP1	exonic	nonsynonymous SNV	DDD4K.02417	DDD_2017	28135719	4293	0	exome	Developmental Delay (DD)	psychiatric disorder	validated	.	non-ssc	.	SVEP1:NM_153366:exon38:c.G8236A:p.G2746R	.	.	.	.	.	.	.	.	.	.	.	.	.	.	.	.	.	.	.	.	.	.	.	.	.	.
.	9q31.3	9	114134022	114134022	G	T	G>T	KIAA0368	exonic	nonsynonymous SNV	DDD4K.04112	DDD_2017	28135719	4293	0	exome	Developmental Delay (DD)	psychiatric disorder	validated	.	non-ssc	.	KIAA0368:NM_001080398:exon44:c.C5150A:p.A1717D	.	.	.	.	.	.	.	.	.	.	.	.	.	.	.	.	.	.	.	.	.	.	.	.	.	.
114987	9q32	9	116082741	116082741	A	G	A>G	WDR31	exonic	nonsynonymous SNV	DDD4K.03484	DDD_2017	28135719	4293	0	exome	Developmental Delay (DD)	psychiatric disorder	validated	.	non-ssc	.	WDR31:NM_001006615:exon8:c.T301C:p.F101L,WDR31:NM_001012361:exon9:c.T676C:p.F226L,WDR31:NM_145241:exon9:c.T673C:p.F225L	.	.	.	.	.	.	.	.	.	.	.	.	.	.	.	.	.	.	.	.	.	.	.	.	.	.
80709	9q32	9	117130728	117130728	C	G	C>G	AKNA	exonic	nonsynonymous SNV	DDD4K.00573	DDD_2017	28135719	4293	0	exome	Developmental Delay (DD)	psychiatric disorder	validated	.	non-ssc	.	AKNA:NM_001317952:exon4:c.G1207C:p.A403P,AKNA:NM_001317950:exon5:c.G1564C:p.A522P,AKNA:NM_030767:exon5:c.G1564C:p.A522P	.	.	.	.	.	.	.	.	.	.	.	.	.	.	.	.	.	.	.	.	.	.	.	.	.	.
2649	9q33.3	9	127302436	127302436	A	G	A>G	NR6A1	exonic	nonsynonymous SNV	DDD4K.00543	DDD_2017	28135719	4293	0	exome	Developmental Delay (DD)	psychiatric disorder	validated	.	non-ssc	.	NR6A1:NM_001278546:exon5:c.T460C:p.S154P,NR6A1:NM_001489:exon5:c.T460C:p.S154P,NR6A1:NM_033334:exon5:c.T472C:p.S158P	.	.	.	.	.	.	.	.	.	.	.	.	.	.	.	.	.	.	.	.	.	.	.	.	.	.
26130	9q33.3	9	128113102	128113102	G	C	G>C	GAPVD1	exonic	nonsynonymous SNV	DDD4K.01189	DDD_2017	28135719	4293	0	exome	Developmental Delay (DD)	psychiatric disorder	validated	.	non-ssc	.	GAPVD1:NM_001282681:exon20:c.G3457C:p.D1153H,GAPVD1:NM_001330778:exon20:c.G3439C:p.D1147H,GAPVD1:NM_001330777:exon21:c.G3376C:p.D1126H,GAPVD1:NM_015635:exon22:c.G3601C:p.D1201H,GAPVD1:NM_001282679:exon23:c.G3574C:p.D1192H,GAPVD1:NM_001282680:exon23:c.G3520C:p.D1174H	.	.	.	.	.	.	.	.	.	.	.	.	.	.	.	.	.	.	.	.	.	.	.	.	.	.
6812	9q34.11	9	130428485	130428485	G	A	G>A	STXBP1	exonic	nonsynonymous SNV	DDD4K.04010	DDD_2017	28135719	4293	0	exome	Developmental Delay (DD)	psychiatric disorder	validated	.	non-ssc	.	STXBP1:NM_001032221:exon9:c.G704A:p.R235Q,STXBP1:NM_003165:exon9:c.G704A:p.R235Q	.	.	.	.	.	.	.	.	.	.	.	.	.	.	.	.	.	.	.	rs794727970	COSM4826257;COSM4826256	1(cervix)	Likely pathogenic|Uncertain significance	not_provided|not_specified	RCV000180590.4|RCV000259191.1	MedGen|MedGen
6812	9q34.11	9	130444768	130444768	G	T	G>T	STXBP1	exonic	nonsynonymous SNV	DDD4K.01415	DDD_2017	28135719	4293	0	exome	Developmental Delay (DD)	psychiatric disorder	validated	.	non-ssc	.	STXBP1:NM_001032221:exon18:c.G1631T:p.G544V,STXBP1:NM_003165:exon18:c.G1631T:p.G544V	.	.	.	.	.	.	.	.	.	.	.	.	.	.	.	.	.	.	.	.	.	.	.	.	.	.
10044	9q34.11	9	130511737	130511737	G	A	G>A	SH2D3C	exonic	nonsynonymous SNV	DDD4K.00253	DDD_2017	28135719	4293	0	exome	Developmental Delay (DD)	psychiatric disorder	validated	.	non-ssc	.	SH2D3C:NM_001142533:exon3:c.C418T:p.R140C,SH2D3C:NM_001142534:exon3:c.C412T:p.R138C,SH2D3C:NM_005489:exon4:c.C421T:p.R141C,SH2D3C:NM_001252334:exon5:c.C688T:p.R230C,SH2D3C:NM_170600:exon5:c.C892T:p.R298C	0.0006	.	0.0014	0.002	.	.	0.0005	0	8.69e-05	0.0015	0.0005	0.0004	0.0011	0.001	0.0001	.	0.0001	.	.	rs143231219	COSM1460130;COSM4784588;COSM4784587;COSM1460129;COSM4784589	1(bone);1(large_intestine)	.	.	.	.
2733	9q34.11	9	131295864	131295864	G	T	G>T	GLE1	exonic	nonsynonymous SNV	DDD4K.03046	DDD_2017	28135719	4293	0	exome	Developmental Delay (DD)	psychiatric disorder	validated	.	non-ssc	.	GLE1:NM_001003722:exon10:c.G1385T:p.R462L,GLE1:NM_001499:exon10:c.G1385T:p.R462L	.	.	.	.	.	.	.	.	.	.	.	.	.	.	.	.	.	.	.	.	.	.	.	.	.	.
6709	9q34.11	9	131388821	131388821	C	G	C>G	SPTAN1	exonic	nonsynonymous SNV	DDD4K.01674	DDD_2017	28135719	4293	0	exome	Developmental Delay (DD)	psychiatric disorder	validated	.	non-ssc	.	SPTAN1:NM_001195532:exon47:c.C6356G:p.S2119C,SPTAN1:NM_003127:exon48:c.C6416G:p.S2139C,SPTAN1:NM_001130438:exon49:c.C6431G:p.S2144C	.	.	.	.	.	.	.	.	.	.	.	.	.	.	.	.	.	.	.	.	.	.	.	.	.	.
84726	9q34.13	9	134308142	134308142	C	T	C>T	PRRC2B	exonic	nonsynonymous SNV	DDD4K.01609	DDD_2017	28135719	4293	0	exome	Developmental Delay (DD)	psychiatric disorder	validated	.	non-ssc	.	PRRC2B:NM_013318:exon2:c.C254T:p.T85M	.	.	.	.	.	.	.	.	.	.	.	.	.	.	.	.	.	.	.	.	.	.	.	.	.	.
8328	9q34.13	9	135865198	135865198	C	A	C>A	GFI1B	exonic	nonsynonymous SNV	DDD4K.04135	DDD_2017	28135719	4293	0	exome	Developmental Delay (DD)	psychiatric disorder	validated	.	non-ssc	.	GFI1B:NM_001135031:exon5:c.C580A:p.L194I,GFI1B:NM_004188:exon10:c.C718A:p.L240I	.	.	.	.	.	.	.	.	.	.	.	.	.	.	.	.	.	.	.	.	.	.	.	.	.	.
25920	9q34.3	9	140157547	140157547	T	G	T>G	NELFB	exonic	nonsynonymous SNV	DDD4K.03527	DDD_2017	28135719	4293	0	exome	Developmental Delay (DD)	psychiatric disorder	validated	.	non-ssc	.	NELFB:NM_015456:exon5:c.T800G:p.L267R	.	.	.	.	.	.	.	.	.	.	.	.	.	.	.	.	.	.	.	.	.	.	.	.	.	.
1183	Xp22.2	X	10188877	10188877	C	T	C>T	CLCN4	exonic	nonsynonymous SNV	DDD4K.02632	DDD_2017	28135719	4293	0	exome	Developmental Delay (DD)	psychiatric disorder	validated	.	non-ssc	.	CLCN4:NM_001256944:exon10:c.C1870T:p.R624W,CLCN4:NM_001830:exon12:c.C2152T:p.R718W	.	.	.	.	.	.	.	.	.	.	.	.	.	.	.	.	.	.	.	.	.	.	Pathogenic	CLCN4-related_disorder	RCV000239734.1	MedGen
2742	Xp22.2	X	14627284	14627284	C	T	C>T	GLRA2	exonic	nonsynonymous SNV	DDD4K.03728	DDD_2017	28135719	4293	0	exome	Developmental Delay (DD)	psychiatric disorder	validated	.	non-ssc	.	GLRA2:NM_001118886:exon7:c.C887T:p.T296M,GLRA2:NM_002063:exon7:c.C887T:p.T296M,GLRA2:NM_001118885:exon8:c.C887T:p.T296M,GLRA2:NM_001171942:exon9:c.C620T:p.T207M	.	.	.	.	.	.	.	.	.	.	.	.	.	.	.	.	.	.	.	.	COSM4961667;COSM4961668	1(pancreas)	.	.	.	.
1756	Xp21.1	X	31514976	31514976	C	T	C>T	DMD	exonic	nonsynonymous SNV	DDD4K.02126	DDD_2017	28135719	4293	0	exome	Developmental Delay (DD)	psychiatric disorder	validated	.	non-ssc	.	DMD:NM_004014:exon3:c.G289A:p.D97N,DMD:NM_004013:exon14:c.G1096A:p.D366N,DMD:NM_004020:exon14:c.G1096A:p.D366N,DMD:NM_004021:exon14:c.G1096A:p.D366N,DMD:NM_004022:exon14:c.G1096A:p.D366N,DMD:NM_004023:exon14:c.G1096A:p.D366N,DMD:NM_004011:exon29:c.G4453A:p.D1485N,DMD:NM_004012:exon29:c.G4444A:p.D1482N,DMD:NM_000109:exon57:c.G8452A:p.D2818N,DMD:NM_004006:exon57:c.G8476A:p.D2826N,DMD:NM_004009:exon…	.	.	.	.	.	.	.	.	.	.	.	.	.	.	.	.	.	.	.	.	.	.	.	.	.	.
8239	Xp11.4	X	41069824	41069824	T	G	T>G	USP9X	exonic	nonsynonymous SNV	DDD4K.04279	DDD_2017	28135719	4293	0	exome	Developmental Delay (DD)	psychiatric disorder	validated	.	non-ssc	.	USP9X:NM_001039590:exon33:c.T5078G:p.L1693W,USP9X:NM_001039591:exon33:c.T5078G:p.L1693W	.	.	.	.	.	.	.	.	.	.	.	.	.	.	.	.	.	.	.	.	.	.	.	.	.	.
1654	Xp11.4	X	41202566	41202566	T	C	T>C	DDX3X	exonic	nonsynonymous SNV	DDD4K.00027	DDD_2017	28135719	4293	0	exome	Developmental Delay (DD)	psychiatric disorder	validated	.	non-ssc	.	DDX3X:NM_001193417:exon6:c.T593C:p.I198T,DDX3X:NM_001193416:exon7:c.T641C:p.I214T,DDX3X:NM_001356:exon7:c.T641C:p.I214T	.	.	.	.	.	.	.	.	.	.	.	.	.	.	.	.	.	.	.	.	.	.	.	.	.	.
1654	Xp11.4	X	41203648	41203648	T	C	T>C	DDX3X	exonic	nonsynonymous SNV	DDD4K.03836	DDD_2017	28135719	4293	0	exome	Developmental Delay (DD)	psychiatric disorder	validated	.	non-ssc	.	DDX3X:NM_001193417:exon9:c.T973C:p.C325R,DDX3X:NM_001193416:exon10:c.T1021C:p.C341R,DDX3X:NM_001356:exon10:c.T1021C:p.C341R	.	.	.	.	.	.	.	.	.	.	.	.	.	.	.	.	.	.	.	.	.	.	.	.	.	.
1654	Xp11.4	X	41204533	41204533	C	T	C>T	DDX3X	exonic	nonsynonymous SNV	DDD4K.02048	DDD_2017	28135719	4293	0	exome	Developmental Delay (DD)	psychiatric disorder	validated	.	non-ssc	.	DDX3X:NM_001193417:exon10:c.C1078T:p.R360C,DDX3X:NM_001193416:exon11:c.C1126T:p.R376C,DDX3X:NM_001356:exon11:c.C1126T:p.R376C	.	.	.	.	.	.	.	.	.	.	.	.	.	.	.	.	.	.	.	rs796052231	COSM302037	1(central_nervous_system)	Pathogenic	Mental_retardation\x2c_X-linked_102	RCV000190550.2	MedGen:OMIM
1654	Xp11.4	X	41205569	41205569	G	A	G>A	DDX3X	exonic	nonsynonymous SNV	DDD4K.00285	DDD_2017	28135719	4293	0	exome	Developmental Delay (DD)	psychiatric disorder	validated	.	non-ssc	.	DDX3X:NM_001193417:exon12:c.G1355A:p.C452Y,DDX3X:NM_001193416:exon13:c.G1403A:p.C468Y,DDX3X:NM_001356:exon13:c.G1403A:p.C468Y	.	.	.	.	.	.	.	.	.	.	.	.	.	.	.	.	.	.	.	.	.	.	.	.	.	.
1654	Xp11.4	X	41205861	41205861	G	A	G>A	DDX3X	exonic	nonsynonymous SNV	DDD4K.03174	DDD_2017	28135719	4293	0	exome	Developmental Delay (DD)	psychiatric disorder	validated	.	non-ssc	.	DDX3X:NM_001193417:exon13:c.G1553A:p.R518H,DDX3X:NM_001193416:exon14:c.G1601A:p.R534H,DDX3X:NM_001356:exon14:c.G1601A:p.R534H	.	.	.	.	.	.	.	.	.	.	.	.	.	.	.	.	.	.	.	.	COSM302036	1(haematopoietic_and_lymphoid_tissue);1(central_nervous_system)	.	.	.	.
8573	Xp11.4	X	41413137	41413137	G	A	G>A	CASK	exonic	nonsynonymous SNV	DDD4K.00417	DDD_2017	28135719	4293	0	exome	Developmental Delay (DD)	psychiatric disorder	validated	.	non-ssc	.	CASK:NM_001126055:exon19:c.C1787T:p.P596L,CASK:NM_001126054:exon20:c.C1805T:p.P602L,CASK:NM_003688:exon21:c.C1874T:p.P625L	.	.	.	.	.	.	.	.	.	.	.	.	.	.	.	.	.	.	.	.	.	.	.	.	.	.
8573	Xp11.4	X	41519760	41519760	G	A	G>A	CASK	exonic	nonsynonymous SNV	DDD4K.00026	DDD_2017	28135719	4293	0	exome	Developmental Delay (DD)	psychiatric disorder	validated	.	non-ssc	.	CASK:NM_001126054:exon8:c.C763T:p.R255C,CASK:NM_001126055:exon8:c.C763T:p.R255C,CASK:NM_003688:exon8:c.C763T:p.R255C	.	.	.	.	.	.	.	.	.	.	.	.	.	.	.	.	.	.	.	.	.	.	.	.	.	.
79742	Xp11.3	X	45059839	45059839	C	T	C>T	CXorf36	exonic	nonsynonymous SNV	DDD4K.04255	DDD_2017	28135719	4293	0	exome	Developmental Delay (DD)	psychiatric disorder	validated	.	non-ssc	.	CXorf36:NM_024689:exon1:c.G233A:p.R78K,CXorf36:NM_176819:exon1:c.G233A:p.R78K	.	.	.	.	.	.	.	.	.	.	.	.	.	.	.	.	.	.	.	.	.	.	.	.	.	.
7317	Xp11.23	X	47058630	47058630	A	G	A>G	UBA1	exonic	nonsynonymous SNV	DDD4K.03829	DDD_2017	28135719	4293	0	exome	Developmental Delay (DD)	psychiatric disorder	validated	.	non-ssc	.	UBA1:NM_003334:exon4:c.A199G:p.M67V,UBA1:NM_153280:exon4:c.A199G:p.M67V	.	.	.	.	.	.	.	.	.	.	.	.	.	.	.	.	.	.	.	.	COSM4381589;COSM4381588;COSM4381590	2(large_intestine)	.	.	.	.
7030	Xp11.23	X	48895942	48895942	G	A	G>A	TFE3	exonic	nonsynonymous SNV	DDD4K.00255	DDD_2017	28135719	4293	0	exome	Developmental Delay (DD)	psychiatric disorder	validated	.	non-ssc	.	TFE3:NM_001282142:exon4:c.C245T:p.T82M,TFE3:NM_006521:exon4:c.C560T:p.T187M	.	.	.	.	.	.	.	.	.	.	.	.	.	.	.	.	.	.	.	.	.	.	.	.	.	.
7030	Xp11.23	X	48896828	48896828	C	T	C>T	TFE3	exonic	nonsynonymous SNV	DDD4K.02671	DDD_2017	28135719	4293	0	exome	Developmental Delay (DD)	psychiatric disorder	validated	.	non-ssc	.	TFE3:NM_001282142:exon3:c.G23A:p.R8K,TFE3:NM_006521:exon3:c.G338A:p.R113K	.	.	.	.	.	.	.	.	.	.	.	.	.	.	.	.	.	.	.	.	.	.	.	.	.	.
11152	Xp11.23	X	48935752	48935752	C	G	C>G	WDR45	exonic	nonsynonymous SNV	DDD4K.03625	DDD_2017	28135719	4293	0	exome	Developmental Delay (DD)	psychiatric disorder	validated	.	non-ssc	.	WDR45:NM_001029896:exon2:c.G3C:p.M1I,WDR45:NM_007075:exon3:c.G3C:p.M1I	.	.	.	.	.	.	.	.	.	.	.	.	.	.	.	.	.	.	.	.	.	.	.	.	.	.
23708	Xp11.22	X	51487590	51487590	G	A	G>A	GSPT2	exonic	nonsynonymous SNV	DDD4K.00480	DDD_2017	28135719	4293	0	exome	Developmental Delay (DD)	psychiatric disorder	validated	.	non-ssc	.	GSPT2:NM_018094:exon1:c.G868A:p.G290S	.	.	.	.	.	.	.	.	.	.	.	.	.	.	.	.	.	.	.	.	.	.	.	.	.	.
8243	Xp11.22	X	53432045	53432045	G	A	G>A	SMC1A	exonic	nonsynonymous SNV	DDD4K.00725	DDD_2017	28135719	4293	0	exome	Developmental Delay (DD)	psychiatric disorder	validated	.	non-ssc	.	SMC1A:NM_006306:exon13:c.C2095T:p.R699C,SMC1A:NM_001281463:exon14:c.C2029T:p.R677C	.	.	.	.	.	.	.	.	.	.	.	.	.	.	.	.	.	.	.	.	COSM1123031	1(endometrium)	.	.	.	.
10075	Xp11.22	X	53642747	53642747	A	C	A>C	HUWE1	exonic	nonsynonymous SNV	DDD4K.03563	DDD_2017	28135719	4293	0	exome	Developmental Delay (DD)	psychiatric disorder	validated	.	non-ssc	.	HUWE1:NM_031407:exon22:c.T2007G:p.H669Q	.	.	.	.	.	.	.	.	.	.	.	.	.	.	.	.	.	.	.	.	.	.	.	.	.	.
169981	Xp11.21	X	57021329	57021329	C	T	C>T	SPIN3	exonic	nonsynonymous SNV	DDD4K.02070	DDD_2017	28135719	4293	0	exome	Developmental Delay (DD)	psychiatric disorder	validated	.	non-ssc	.	SPIN3:NM_001010862:exon2:c.G52A:p.A18T	.	.	.	.	.	.	.	.	.	.	.	.	.	.	.	.	.	.	.	.	.	.	.	.	.	.
9843	Xq12	X	65392435	65392435	T	A	T>A	HEPH	exonic	nonsynonymous SNV	DDD4K.00428	DDD_2017	28135719	4293	0	exome	Developmental Delay (DD)	psychiatric disorder	validated	.	non-ssc	.	HEPH:NM_001130860:exon3:c.T415A:p.S139T,HEPH:NM_001282141:exon3:c.T415A:p.S139T,HEPH:NM_138737:exon3:c.T568A:p.S190T	.	.	.	.	.	.	.	.	.	.	.	.	.	.	.	.	.	.	.	.	.	.	.	.	.	.
3476	Xq13.1	X	69385811	69385811	A	G	A>G	IGBP1	exonic	nonsynonymous SNV	DDD4K.00184	DDD_2017	28135719	4293	0	exome	Developmental Delay (DD)	psychiatric disorder	validated	.	non-ssc	.	IGBP1:NM_001551:exon7:c.A1000G:p.N334D	.	.	.	.	.	.	.	.	.	.	.	.	.	.	.	.	.	.	.	.	.	.	.	.	.	.
9968	Xq13.1	X	70349949	70349949	T	A	T>A	MED12	exonic	nonsynonymous SNV	DDD4K.03363	DDD_2017	28135719	4293	0	exome	Developmental Delay (DD)	psychiatric disorder	validated	.	non-ssc	.	MED12:NM_005120:exon28:c.T3932A:p.V1311E	.	.	.	.	.	.	.	.	.	.	.	.	.	.	.	.	.	.	.	.	.	.	.	.	.	.
6872	Xq13.1	X	70627912	70627912	G	A	G>A	TAF1	exonic	nonsynonymous SNV	DDD4K.00983	DDD_2017	28135719	4293	0	exome	Developmental Delay (DD)	psychiatric disorder	validated	.	non-ssc	.	TAF1:NM_001286074:exon28:c.G4355A:p.R1452H,TAF1:NM_004606:exon28:c.G4355A:p.R1452H,TAF1:NM_138923:exon28:c.G4292A:p.R1431H	.	.	.	.	.	.	.	.	.	.	.	.	.	.	.	.	.	.	.	.	.	.	.	.	.	.
8473	Xq13.1	X	70779215	70779215	T	A	T>A	OGT	exonic	nonsynonymous SNV	DDD4K.02848	DDD_2017	28135719	4293	0	exome	Developmental Delay (DD)	psychiatric disorder	validated	.	non-ssc	.	OGT:NM_181672:exon13:c.T1701A:p.N567K,OGT:NM_181673:exon13:c.T1671A:p.N557K	.	.	.	.	.	.	.	.	.	.	.	.	.	.	.	.	.	.	.	.	.	.	.	.	.	.
54821	Xq13.1	X	71427544	71427544	A	G	A>G	ERCC6L	exonic	nonsynonymous SNV	DDD4K.00989	DDD_2017	28135719	4293	0	exome	Developmental Delay (DD)	psychiatric disorder	validated	.	non-ssc	.	ERCC6L:NM_017669:exon2:c.T1073C:p.M358T	.	.	.	.	.	.	.	.	.	.	.	.	.	.	.	.	.	.	.	.	.	.	.	.	.	.
55869	Xq13.1	X	71715077	71715077	A	G	A>G	HDAC8	exonic	nonsynonymous SNV	DDD4K.04256	DDD_2017	28135719	4293	0	exome	Developmental Delay (DD)	psychiatric disorder	validated	.	non-ssc	.	HDAC8:NM_001166418:exon3:c.T206C:p.L69P,HDAC8:NM_001166448:exon3:c.T206C:p.L69P,HDAC8:NM_001166419:exon5:c.T479C:p.L160P,HDAC8:NM_018486:exon5:c.T479C:p.L160P	.	.	.	.	.	.	.	.	.	.	.	.	.	.	.	.	.	.	.	.	.	.	.	.	.	.
5063	Xq23	X	110439801	110439801	C	T	C>T	PAK3	exonic	nonsynonymous SNV	DDD4K.01011	DDD_2017	28135719	4293	0	exome	Developmental Delay (DD)	psychiatric disorder	validated	.	non-ssc	.	PAK3:NM_001128167:exon13:c.C1340T:p.S447F,PAK3:NM_001128172:exon13:c.C1403T:p.S468F,PAK3:NM_001128166:exon14:c.C1340T:p.S447F,PAK3:NM_001324325:exon14:c.C1340T:p.S447F,PAK3:NM_001324326:exon14:c.C1340T:p.S447F,PAK3:NM_001324330:exon14:c.C1340T:p.S447F,PAK3:NM_001324328:exon15:c.C1385T:p.S462F,PAK3:NM_001324331:exon15:c.C1340T:p.S447F,PAK3:NM_001324334:exon15:c.C1340T:p.S447F,PAK3:NM_001324327:exo…	.	.	.	.	.	.	.	.	.	.	.	.	.	.	.	.	.	.	.	.	COSM3556813;COSM3556814	1(skin)	.	.	.	.
7224	Xq23	X	111195437	111195437	C	T	C>T	TRPC5	exonic	nonsynonymous SNV	DDD4K.00047	DDD_2017	28135719	4293	0	exome	Developmental Delay (DD)	psychiatric disorder	validated	.	non-ssc	.	TRPC5:NM_012471:exon2:c.G212A:p.R71Q	.	.	.	.	.	.	.	.	.	.	.	.	.	.	.	.	.	.	.	.	COSM4105929	1(stomach)	.	.	.	.
10735	Xq25	X	123197045	123197045	G	A	G>A	STAG2	exonic	nonsynonymous SNV	DDD4K.01746	DDD_2017	28135719	4293	0	exome	Developmental Delay (DD)	psychiatric disorder	validated	.	non-ssc	.	STAG2:NM_006603:exon18:c.G1811A:p.R604Q,STAG2:NM_001042749:exon19:c.G1811A:p.R604Q,STAG2:NM_001042750:exon19:c.G1811A:p.R604Q,STAG2:NM_001042751:exon19:c.G1811A:p.R604Q,STAG2:NM_001282418:exon19:c.G1811A:p.R604Q	.	.	.	.	.	.	.	.	.	.	.	.	.	.	.	.	.	.	.	.	COSM4730372;COSM4730371	1(large_intestine)	.	.	.	.
286410	Xq27.1	X	138850486	138850486	A	C	A>C	ATP11C	exonic	nonsynonymous SNV	DDD4K.02487	DDD_2017	28135719	4293	0	exome	Developmental Delay (DD)	psychiatric disorder	validated	.	non-ssc	.	ATP11C:NM_001010986:exon20:c.T2333G:p.F778C,ATP11C:NM_173694:exon20:c.T2333G:p.F778C	.	.	.	.	.	.	.	.	.	.	.	.	.	.	.	.	.	.	.	.	.	.	.	.	.	.
2556	Xq28	X	151358407	151358407	G	C	G>C	GABRA3	exonic	nonsynonymous SNV	DDD4K.02900	DDD_2017	28135719	4293	0	exome	Developmental Delay (DD)	psychiatric disorder	validated	.	non-ssc	.	GABRA3:NM_000808:exon9:c.C938G:p.T313S	.	.	.	.	.	.	.	.	.	.	.	.	.	.	.	.	.	.	.	.	.	.	.	.	.	.
8260	Xq28	X	153197526	153197526	A	T	A>T	NAA10	exonic	nonsynonymous SNV	DDD4K.04209	DDD_2017	28135719	4293	0	exome	Developmental Delay (DD)	psychiatric disorder	validated	.	non-ssc	.	NAA10:NM_001256120:exon6:c.T366A:p.F122L,NAA10:NM_003491:exon6:c.T384A:p.F128L	.	.	.	.	.	.	.	.	.	.	.	.	.	.	.	.	.	.	.	.	.	.	Pathogenic\x2cPathogenic|Pathogenic	not_provided\x2cN-terminal_acetyltransferase_deficiency|not_provided	RCV000340214.1\x2cRCV000225366.1|RCV000414068.1	MedGen\x2cMedGen:OMIM:Orphanet|MedGen
8260	Xq28	X	153197863	153197863	G	A	G>A	NAA10	exonic	nonsynonymous SNV	DDD4K.01931	DDD_2017	28135719	4293	0	exome	Developmental Delay (DD)	psychiatric disorder	validated	.	non-ssc	.	NAA10:NM_001256119:exon5:c.C247T:p.R83C,NAA10:NM_001256120:exon5:c.C229T:p.R77C,NAA10:NM_003491:exon5:c.C247T:p.R83C	.	.	.	.	.	.	.	.	.	.	.	.	.	.	.	.	.	.	.	rs797044868	.	.	Likely pathogenic|Pathogenic|Pathogenic	Inborn_genetic_diseases|N-terminal_acetyltransferase_deficiency|not_provided	RCV000190675.1|RCV000225365.1|RCV000255490.1	MeSH:MedGen|MedGen:OMIM:Orphanet|MedGen
4204	Xq28	X	153296806	153296806	G	A	G>A	MECP2	exonic	nonsynonymous SNV	DDD4K.01943	DDD_2017	28135719	4293	0	exome	Developmental Delay (DD)	psychiatric disorder	validated	.	non-ssc	.	MECP2:NM_001110792:exon3:c.C509T:p.T170M,MECP2:NM_004992:exon4:c.C473T:p.T158M,MECP2:NM_001316337:exon5:c.C194T:p.T65M	.	.	.	.	.	.	.	.	.	.	.	.	.	.	.	.	.	.	.	rs28934906	COSM3033684	2(haematopoietic_and_lymphoid_tissue);1(large_intestine)	other|Pathogenic|Pathogenic|Pathogenic|Pathogenic|Pathogenic|Pathogenic	Rett_syndrome|Encephalopathy\x2c_neonatal_severe\x2c_due_to_mecp2_mutation|not_provided|Autism\x2c_susceptibility_to\x2c_X-linked_3|Angelman_syndrome|Severe_neonatal-onset_encephalopathy_with_microcephaly|Mental_retardation\x2c_X-linked\x2c_syndromic_13	RCV000012580.24|RCV000012581.23|RCV000133129.5|RCV000169935.1|RCV000170109.1|RCV000170110.1|RCV000315674.1	MedGen|MedGen:OMIM|MedGen:OMIM:Orphanet:SNOMED_CT|MedGen:OMIM:Orphanet|MedGen:OMIM:Orphanet
4204	Xq28	X	153296882	153296882	G	A	G>A	MECP2	exonic	nonsynonymous SNV	DDD4K.03965	DDD_2017	28135719	4293	0	exome	Developmental Delay (DD)	psychiatric disorder	validated	.	non-ssc	.	MECP2:NM_001110792:exon3:c.C433T:p.R145C,MECP2:NM_004992:exon4:c.C397T:p.R133C,MECP2:NM_001316337:exon5:c.C118T:p.R40C	.	.	.	.	.	.	.	.	.	.	.	.	.	.	.	.	.	.	.	rs28934904	.	.	Pathogenic|Pathogenic|Pathogenic|Pathogenic|Pathogenic|Uncertain significance|Pathogenic|Pathogenic|Pathogenic\x2cUncertain significance	Rett_syndrome\x2c_zappella_variant|Rett_syndrome|not_provided|Angelman_syndrome|Mental_retardation\x2c_X-linked\x2c_syndromic_13|not_specified|Angelman_syndrome|Mental_retardation\x2c_X-linked\x2c_syndromic_13|Rett_syndrome\x2cRett_syndrome	RCV000012578.23|RCV000030666.26|RCV000081202.7|RCV000169934.1|RCV000170107.2|RCV000445570.1|RCV000460141.1|RCV000460141.1|RCV000460141.1\x2cRCV000133091.2	MedGen|MedGen:OMIM:Orphanet:SNOMED_CT|MedGen|MedGen:OMIM:Orphanet:SNOMED_CT|MedGen:OMIM:Orphanet|MedGen|MedGen:OMIM:Orphanet:SNOMED_CT|MedGen:OMIM:Orphanet|MedGen:OMIM:Orphanet:SNOMED_CT\x2cMedGen:OMIM:Orphanet:SNOMED_CT
2316	Xq28	X	153579375	153579375	A	G	A>G	FLNA	exonic	nonsynonymous SNV	DDD4K.00867	DDD_2017	28135719	4293	0	exome	Developmental Delay (DD)	psychiatric disorder	validated	.	non-ssc	.	FLNA:NM_001456:exon43:c.T7034C:p.F2345S,FLNA:NM_001110556:exon44:c.T7058C:p.F2353S	.	.	.	.	.	.	.	.	.	.	.	.	.	.	.	.	.	.	.	.	.	.	.	.	.	.
4780;4780	2q31.2	2	178098803	178098803	C	T	C>T	NFE2L2;NFE2L2	exonic;splicing	nonsynonymous SNV	DDD4K.00113	DDD_2017	28135719	4293	0	exome	Developmental Delay (DD)	psychiatric disorder	validated	.	non-ssc	NM_001313904:exon2:c.12+1G>A	NFE2L2:NM_001145412:exon2:c.G194A:p.G65D,NFE2L2:NM_001145413:exon2:c.G194A:p.G65D,NFE2L2:NM_001313900:exon2:c.G194A:p.G65D,NFE2L2:NM_001313901:exon2:c.G194A:p.G65D,NFE2L2:NM_001313902:exon2:c.G242A:p.G81D,NFE2L2:NM_006164:exon2:c.G242A:p.G81D	.	.	.	.	.	.	.	.	.	.	.	.	.	.	.	.	.	.	.	.	COSM132957	1(breast);1(kidney);1(oesophagus);1(skin);3(lung)	.	.	.	.
339451	1p36.33	1	897417	897417	C	T	C>T	KLHL17	exonic	nonsynonymous SNV	DDD4K.03258	DDD_2017	28135719	4293	0	exome	Developmental Delay (DD)	psychiatric disorder	not_available	.	non-ssc	.	KLHL17:NM_198317:exon4:c.C701T:p.P234L	0.0002	.	.	0.001	.	.	8.58e-06	0.0001	0	0	0	0	0	0	.	.	.	.	.	rs539689146	.	.	.	.	.	.
84069	1p36.33	1	906105	906105	G	A	G>A	PLEKHN1	exonic	nonsynonymous SNV	DDD4K.01866	DDD_2017	28135719	4293	0	exome	Developmental Delay (DD)	psychiatric disorder	not_available	.	non-ssc	.	PLEKHN1:NM_001160184:exon5:c.G451A:p.E151K,PLEKHN1:NM_032129:exon5:c.G451A:p.E151K	.	.	.	.	.	.	.	.	.	.	.	.	.	.	.	.	.	.	.	rs766380314	.	.	.	.	.	.
84808	1p36.33	1	915025	915025	G	A	G>A	PERM1	exonic	nonsynonymous SNV	DDD4K.00472	DDD_2017	28135719	4293	0	exome	Developmental Delay (DD)	psychiatric disorder	not_available	.	non-ssc	.	PERM1:NM_001291366:exon2:c.C1385T:p.T462I,PERM1:NM_001291367:exon3:c.C1103T:p.T368I	0.0002	.	.	.	0.001	.	0.0002	0	0	0	0	0.0006	0	0	.	.	.	.	.	rs541767076	.	.	.	.	.	.
375790	1p36.33	1	990342	990342	G	A	G>A	AGRN	exonic	nonsynonymous SNV	DDD4K.03507	DDD_2017	28135719	4293	0	exome	Developmental Delay (DD)	psychiatric disorder	not_available	.	non-ssc	.	AGRN:NM_198576:exon36:c.G6119A:p.R2040Q	0.0008	.	.	0.001	.	0.0031	0.0017	0	0	0.0024	0	0	0	0.0034	.	.	.	.	.	rs527639453	.	.	.	.	.	.
8784	1p36.33	1	1139216	1139216	G	A	G>A	TNFRSF18	exonic	nonsynonymous SNV	DDD4K.04169	DDD_2017	28135719	4293	0	exome	Developmental Delay (DD)	psychiatric disorder	not_available	.	non-ssc	.	TNFRSF18:NM_148901:exon4:c.C523T:p.R175C	0.0016	0.0015	0.0014	.	0.005	.	0.004	0.0009	0.0026	0	0.0017	0.0065	0.0027	0.0015	0.0034	0.0021	0.004	0.022	.	rs11466695	.	.	.	.	.	.
7293	1p36.33	1	1147462	1147462	A	G	A>G	TNFRSF4	exonic	nonsynonymous SNV	DDD4K.04233	DDD_2017	28135719	4293	0	exome	Developmental Delay (DD)	psychiatric disorder	not_available	.	non-ssc	.	TNFRSF4:NM_003327:exon5:c.T494C:p.I165T	0.0002	.	0.0014	.	.	.	0.0012	0.0001	0.0011	0	0.0007	0.0018	0.0037	0	0.0008	.	0.0013	.	.	rs150407012	.	.	.	.	.	.
6339	1p36.33	1	1225917	1225917	G	A	G>A	SCNN1D	exonic	nonsynonymous SNV	DDD4K.04157	DDD_2017	28135719	4293	0	exome	Developmental Delay (DD)	psychiatric disorder	not_available	.	non-ssc	.	SCNN1D:NM_001130413:exon14:c.G1841A:p.R614H	0.0002	0.0008	.	.	.	.	0.0002	0.0005	0.0003	0.0001	0	0.0002	0	6.06e-05	0.0004	0.0002	0.0005	.	.	rs201531018	.	.	.	.	.	.
6339	1p36.33	1	1226770	1226770	G	A	G>A	SCNN1D	exonic	nonsynonymous SNV	DDD4K.02366	DDD_2017	28135719	4293	0	exome	Developmental Delay (DD)	psychiatric disorder	not_available	.	non-ssc	.	SCNN1D:NM_001130413:exon18:c.G2189A:p.R730H	0.0006	0.0008	0.0014	.	.	0.001	0.0003	0.0003	0.0004	0	0	0.0003	0	0.0004	0.0002	0.0002	0.0002	.	.	rs143429630	.	.	.	.	.	.
54973	1p36.33	1	1247625	1247625	C	T	C>T	INTS11	exonic	nonsynonymous SNV	DDD4K.03756	DDD_2017	28135719	4293	0	exome	Developmental Delay (DD)	psychiatric disorder	not_available	.	non-ssc	.	INTS11:NM_001256462:exon13:c.G1294A:p.V432I,INTS11:NM_001256463:exon13:c.G1285A:p.V429I,INTS11:NM_017871:exon15:c.G1588A:p.V530I,INTS11:NM_001256460:exon16:c.G1501A:p.V501I,INTS11:NM_001256456:exon17:c.G1606A:p.V536I	.	.	.	.	.	.	.	.	.	.	.	.	.	.	.	.	.	.	.	.	.	.	.	.	.	.
83756	1p36.33	1	1267040	1267040	T	G	T>G	TAS1R3	exonic	nonsynonymous SNV	DDD4K.04085	DDD_2017	28135719	4293	0	exome	Developmental Delay (DD)	psychiatric disorder	not_available	.	non-ssc	.	TAS1R3:NM_152228:exon2:c.T214G:p.W72G	0.0012	0.0008	0.0029	.	0.003	.	0.0002	0.0002	0.0011	0	0	0.0002	0	0	.	.	.	.	.	rs144594741	.	.	.	.	.	.
1855	1p36.33	1	1271848	1271848	G	A	G>A	DVL1	exonic	nonsynonymous SNV	DDD4K.02338	DDD_2017	28135719	4293	0	exome	Developmental Delay (DD)	psychiatric disorder	not_available	.	non-ssc	.	DVL1:NM_001330311:exon15:c.C1762T:p.R588C,DVL1:NM_004421:exon15:c.C1687T:p.R563C	.	.	.	.	.	.	0.0003	0.0001	0.0003	0	0	0.0005	0	0	0.0002	.	0.0003	.	.	rs202097902	COSM4619655;COSM1185265	1(lung);1(large_intestine)	.	.	.	.
1855	1p36.33	1	1284388	1284388	T	C	T>C	DVL1	exonic	nonsynonymous SNV	DDD4K.00069	DDD_2017	28135719	4293	0	exome	Developmental Delay (DD)	psychiatric disorder	not_available	.	non-ssc	.	DVL1:NM_001330311:exon1:c.A58G:p.K20E,DVL1:NM_004421:exon1:c.A58G:p.K20E	.	.	.	.	.	.	.	.	.	.	.	.	.	.	.	.	.	.	.	.	.	.	.	.	.	.
81669	1p36.33	1	1334520	1334520	T	A	T>A	CCNL2	exonic	nonsynonymous SNV	DDD4K.01497	DDD_2017	28135719	4293	0	exome	Developmental Delay (DD)	psychiatric disorder	not_available	.	non-ssc	.	CCNL2:NM_001039577:exon1:c.A167T:p.D56V,CCNL2:NM_030937:exon1:c.A167T:p.D56V	.	.	.	.	.	.	.	.	.	.	.	.	.	.	.	.	.	.	.	.	.	.	.	.	.	.
219293	1p36.33	1	1391283	1391283	C	T	C>T	ATAD3C	exonic	nonsynonymous SNV	DDD4K.03826	DDD_2017	28135719	4293	0	exome	Developmental Delay (DD)	psychiatric disorder	not_available	.	non-ssc	.	ATAD3C:NM_001039211:exon6:c.C551T:p.T184M	0.0002	0.0008	.	.	.	.	4.16e-05	9.75e-05	0	0	0.0002	4.57e-05	0	0	0.0002	.	0.0003	.	.	rs374211185	.	.	.	.	.	.
2782	1p36.33	1	1736013	1736013	G	T	G>T	GNB1	exonic	nonsynonymous SNV	DDD4K.03207	DDD_2017	28135719	4293	0	exome	Developmental Delay (DD)	psychiatric disorder	not_available	.	non-ssc	.	GNB1:NM_001282539:exon6:c.C275A:p.A92D,GNB1:NM_002074:exon7:c.C275A:p.A92D	.	.	.	.	.	.	.	.	.	.	.	.	.	.	.	.	.	.	.	.	.	.	.	.	.	.
2782	1p36.33	1	1737942	1737942	A	G	A>G	GNB1	exonic	nonsynonymous SNV	DDD4K.00030	DDD_2017	28135719	4293	0	exome	Developmental Delay (DD)	psychiatric disorder	not_available	.	non-ssc	.	GNB1:NM_001282539:exon5:c.T239C:p.I80T,GNB1:NM_002074:exon6:c.T239C:p.I80T	.	.	.	.	.	.	8.28e-06	0	0	0	0	1.5e-05	0	0	.	.	.	.	.	rs752746786	COSM1290046	3(haematopoietic_and_lymphoid_tissue)	Pathogenic\x2cUncertain significance|Pathogenic|Pathogenic|Pathogenic|Pathogenic|Pathogenic|Pathogenic|Pathogenic|Pathogenic|Pathogenic|Pathogenic|Pathogenic|Pathogenic|Pathogenic|Pathogenic|Pathogenic|Pathogenic|Pathogenic|Pathogenic|Pathogenic|Pathogenic|Pathogenic|Pathogenic|Pathogenic\x2cPathogenic|Pathogenic|Pathogenic|Pathogenic|Pathogenic|Pathogenic|Pathogenic|Pathogenic|Pathogenic|Pathoge…	not_provided\x2cInborn_genetic_diseases|Cleft_palate|Dystonia|Growth_delay|Hypothyroidism|Infantile_axial_hypotonia|Intellectual_disability|Upper_limb_hypertonia|Developmental_regression|EEG_with_generalized_epileptiform_discharges|Expressive_language_delay|Failure_to_thrive|Global_developmental_delay|Growth_delay|Inability_to_walk|Limb_hypertonia|Multifocal_epileptiform_discharges|Muscular_hypot…	RCV000439050.1\x2cRCV000190738.1|RCV000208571.1|RCV000208571.1|RCV000208571.1|RCV000208571.1|RCV000208571.1|RCV000208571.1|RCV000208571.1|RCV000210259.1|RCV000210259.1|RCV000210259.1|RCV000210259.1|RCV000210259.1|RCV000210259.1|RCV000210259.1|RCV000210259.1|RCV000210259.1|RCV000210259.1|RCV000210259.1|RCV000210259.1|RCV000210259.1|RCV000225179.2|RCV000225295.2|RCV000418135.1\x2cRCV000210280.1|RCV…	MedGen\x2cMeSH:MedGen|MedGen:Orphanet|MedGen|Human_Phenotype_Ontology:MedGen|Human_Phenotype_Ontology:MedGen|Human_Phenotype_Ontology:MedGen|Human_Phenotype_Ontology:MedGen|Human_Phenotype_Ontology:MedGen|Human_Phenotype_Ontology:MedGen|Human_Phenotype_Ontology:MedGen|Human_Phenotype_Ontology:MedGen|Human_Phenotype_Ontology:MedGen|Human_Phenotype_Ontology:MedGen|Human_Phenotype_Ontology:MedGen|Hu…
9651	1p36.32	1	2435906	2435906	C	T	C>T	PLCH2	exonic	nonsynonymous SNV	DDD4K.04123	DDD_2017	28135719	4293	0	exome	Developmental Delay (DD)	psychiatric disorder	not_available	.	non-ssc	.	PLCH2:NM_014638:exon22:c.C3505T:p.R1169C	0.0002	0.0008	.	.	.	.	6.75e-05	0.0001	0	0.0001	0	9.24e-05	0	0	0.0001	.	0.0001	.	.	rs376060671	.	.	.	.	.	.
55229	1p36.32	1	2452286	2452286	T	C	T>C	PANK4	exonic	nonsynonymous SNV	DDD4K.02884	DDD_2017	28135719	4293	0	exome	Developmental Delay (DD)	psychiatric disorder	not_available	.	non-ssc	.	PANK4:NM_018216:exon4:c.A506G:p.N169S	.	.	.	.	.	.	.	.	.	.	.	.	.	.	.	.	.	.	.	.	.	.	.	.	.	.
79258	1p36.32	1	2522439	2522439	C	T	C>T	MMEL1	exonic	nonsynonymous SNV	DDD4K.03456	DDD_2017	28135719	4293	0	exome	Developmental Delay (DD)	psychiatric disorder	not_available	.	non-ssc	.	MMEL1:NM_033467:exon24:c.G2330A:p.R777H	0.0004	.	.	.	.	0.002	0.0003	0	0.0016	0.0004	0	0.0001	0	0.0004	.	.	.	.	.	rs564401130	.	.	.	.	.	.
63976	1p36.32	1	3102904	3102904	G	A	G>A	PRDM16	exonic	nonsynonymous SNV	DDD4K.03253	DDD_2017	28135719	4293	0	exome	Developmental Delay (DD)	psychiatric disorder	not_available	.	non-ssc	.	PRDM16:NM_022114:exon2:c.G253A:p.E85K,PRDM16:NM_199454:exon2:c.G253A:p.E85K	.	.	.	.	.	.	.	.	.	.	.	.	.	.	.	.	.	.	.	.	.	.	.	.	.	.
1953	1p36.32	1	3413293	3413293	T	C	T>C	MEGF6	exonic	nonsynonymous SNV	DDD4K.01179	DDD_2017	28135719	4293	0	exome	Developmental Delay (DD)	psychiatric disorder	not_available	.	non-ssc	.	MEGF6:NM_001409:exon29:c.A3668G:p.N1223S	.	.	.	.	.	.	.	.	.	.	.	.	.	.	.	.	.	.	.	.	.	.	.	.	.	.
9731	1p36.32	1	3747668	3747668	C	T	C>T	CEP104	exonic	nonsynonymous SNV	DDD4K.03798	DDD_2017	28135719	4293	0	exome	Developmental Delay (DD)	psychiatric disorder	not_available	.	non-ssc	.	CEP104:NM_014704:exon13:c.G1778A:p.R593Q	.	.	.	.	.	.	8.24e-06	0	0	0.0001	0	0	0	0	.	.	.	.	.	rs757757742	.	.	.	.	.	.
1677	1p36.32	1	3782526	3782526	C	T	C>T	DFFB	exonic	nonsynonymous SNV	DDD4K.02779	DDD_2017	28135719	4293	0	exome	Developmental Delay (DD)	psychiatric disorder	not_available	.	non-ssc	.	DFFB:NM_001282669:exon3:c.C464T:p.A155V,DFFB:NM_001320132:exon3:c.C245T:p.A82V,DFFB:NM_001320136:exon3:c.C200T:p.A67V,DFFB:NM_004402:exon3:c.C392T:p.A131V	.	.	.	.	.	.	.	.	.	.	.	.	.	.	.	.	.	.	.	.	.	.	.	.	.	.
261734	1p36.31	1	5924544	5924544	G	A	G>A	NPHP4	exonic	nonsynonymous SNV	DDD4K.00509	DDD_2017	28135719	4293	0	exome	Developmental Delay (DD)	psychiatric disorder	not_available	.	non-ssc	.	NPHP4:NM_001291594:exon24:c.C2314T:p.R772C,NPHP4:NM_001291593:exon25:c.C2311T:p.R771C,NPHP4:NM_015102:exon28:c.C3850T:p.R1284C	.	.	.	.	.	.	0.0003	0	0	0	0	0.0006	0	0	.	.	.	.	.	rs779755743	.	.	.	.	.	.
26038	1p36.31	1	6195421	6195421	C	G	C>G	CHD5	exonic	nonsynonymous SNV	DDD4K.02565	DDD_2017	28135719	4293	0	exome	Developmental Delay (DD)	psychiatric disorder	not_available	.	non-ssc	.	CHD5:NM_015557:exon18:c.G2739C:p.K913N	.	.	.	.	.	.	.	.	.	.	.	.	.	.	.	.	.	.	.	.	.	.	.	.	.	.
26038	1p36.31	1	6214848	6214848	G	A	G>A	CHD5	exonic	nonsynonymous SNV	DDD4K.04028	DDD_2017	28135719	4293	0	exome	Developmental Delay (DD)	psychiatric disorder	not_available	.	non-ssc	.	CHD5:NM_015557:exon5:c.C617T:p.A206V	.	.	.	.	.	.	.	.	.	.	.	.	.	.	.	.	.	.	.	.	.	.	.	.	.	.
387509	1p36.31	1	6313858	6313858	C	T	C>T	GPR153	exonic	nonsynonymous SNV	DDD4K.03345	DDD_2017	28135719	4293	0	exome	Developmental Delay (DD)	psychiatric disorder	not_available	.	non-ssc	.	GPR153:NM_207370:exon3:c.G706A:p.A236T	0.0002	.	0.0014	.	.	.	0.0002	0	0.0013	0	0	6.34e-05	0	0.0001	.	.	.	.	.	rs189356842	COSM4688036	1(large_intestine)	.	.	.	.
83715	1p36.31	1	6520100	6520100	A	G	A>G	ESPN	exonic	nonsynonymous SNV	DDD4K.02384	DDD_2017	28135719	4293	0	exome	Developmental Delay (DD)	psychiatric disorder	not_available	.	non-ssc	.	ESPN:NM_031475:exon13:c.A2459G:p.E820G	.	.	.	.	.	.	0.0002	0.0009	0	0	0.0009	0.0002	0	0	.	.	.	.	.	rs756609029	.	.	.	.	.	.
3104	1p36.31	1	6640897	6640897	G	C	G>C	ZBTB48	exonic	nonsynonymous SNV	DDD4K.03426	DDD_2017	28135719	4293	0	exome	Developmental Delay (DD)	psychiatric disorder	not_available	.	non-ssc	.	ZBTB48:NM_001278647:exon2:c.G228C:p.L76F,ZBTB48:NM_001278648:exon2:c.G228C:p.L76F,ZBTB48:NM_005341:exon2:c.G228C:p.L76F	.	.	.	.	.	.	.	.	.	.	.	.	.	.	.	.	.	.	.	.	.	.	.	.	.	.
55735	1p36.31	1	6697519	6697519	C	G	C>G	DNAJC11	exonic	nonsynonymous SNV	DDD4K.02653	DDD_2017	28135719	4293	0	exome	Developmental Delay (DD)	psychiatric disorder	not_available	.	non-ssc	.	DNAJC11:NM_018198:exon13:c.G1369C:p.E457Q	.	.	.	.	.	.	.	.	.	.	.	.	.	.	.	.	.	.	.	.	.	.	.	.	.	.
23261	1p36.23	1	7309651	7309651	G	A	G>A	CAMTA1	exonic	nonsynonymous SNV	DDD4K.03534	DDD_2017	28135719	4293	0	exome	Developmental Delay (DD)	psychiatric disorder	not_available	.	non-ssc	.	CAMTA1:NM_001349608:exon4:c.G313A:p.E105K,CAMTA1:NM_001349612:exon4:c.G313A:p.E105K,CAMTA1:NM_001349609:exon5:c.G403A:p.E135K,CAMTA1:NM_001349610:exon5:c.G403A:p.E135K,CAMTA1:NM_015215:exon5:c.G403A:p.E135K	.	.	.	.	.	.	.	.	.	.	.	.	.	.	.	.	.	.	.	.	.	.	.	.	.	.
473	1p36.23	1	8419927	8419927	C	T	C>T	RERE	exonic	nonsynonymous SNV	DDD4K.02597	DDD_2017	28135719	4293	0	exome	Developmental Delay (DD)	psychiatric disorder	not_available	.	non-ssc	.	RERE:NM_001042682:exon9:c.G1853A:p.R618H,RERE:NM_001042681:exon19:c.G3515A:p.R1172H,RERE:NM_012102:exon20:c.G3515A:p.R1172H	.	.	.	.	.	.	.	.	.	.	.	.	.	.	.	.	.	.	.	.	COSM3401037	1(central_nervous_system)	.	.	.	.
473	1p36.23	1	8420026	8420026	C	T	C>T	RERE	exonic	nonsynonymous SNV	DDD4K.02486	DDD_2017	28135719	4293	0	exome	Developmental Delay (DD)	psychiatric disorder	not_available	.	non-ssc	.	RERE:NM_001042682:exon9:c.G1754A:p.R585Q,RERE:NM_001042681:exon19:c.G3416A:p.R1139Q,RERE:NM_012102:exon20:c.G3416A:p.R1139Q	.	.	.	.	.	.	8.34e-06	0	0	0	0	1.52e-05	0	0	0.0001	.	0.0001	.	.	rs370423843	.	.	.	.	.	.
473	1p36.23	1	8422852	8422852	C	T	C>T	RERE	exonic	nonsynonymous SNV	DDD4K.00580	DDD_2017	28135719	4293	0	exome	Developmental Delay (DD)	psychiatric disorder	not_available	.	non-ssc	.	RERE:NM_001042682:exon6:c.G131A:p.R44H,RERE:NM_001042681:exon16:c.G1793A:p.R598H,RERE:NM_012102:exon17:c.G1793A:p.R598H	.	.	.	.	.	.	2.47e-05	0	0	0	0	4.5e-05	0	0	0.0001	.	0.0001	.	.	rs373272022	.	.	.	.	.	.
2023	1p36.23	1	8921433	8921433	G	T	G>T	ENO1	exonic	nonsynonymous SNV	DDD4K.03321	DDD_2017	28135719	4293	0	exome	Developmental Delay (DD)	psychiatric disorder	not_available	.	non-ssc	.	ENO1:NM_001201483:exon9:c.C1012A:p.P338T,ENO1:NM_001428:exon12:c.C1291A:p.P431T	.	.	.	.	.	.	.	.	.	.	.	.	.	.	.	.	.	.	.	.	.	.	.	.	.	.
2023	1p36.23	1	8925446	8925446	C	G	C>G	ENO1	exonic	nonsynonymous SNV	DDD4K.01661	DDD_2017	28135719	4293	0	exome	Developmental Delay (DD)	psychiatric disorder	not_available	.	non-ssc	.	ENO1:NM_001201483:exon5:c.G484C:p.G162R,ENO1:NM_001428:exon8:c.G763C:p.G255R	.	.	.	.	.	.	.	.	.	.	.	.	.	.	.	.	.	.	.	.	.	.	.	.	.	.
9563	1p36.22	1	9323759	9323759	G	A	G>A	H6PD	exonic	nonsynonymous SNV	DDD4K.03908	DDD_2017	28135719	4293	0	exome	Developmental Delay (DD)	psychiatric disorder	not_available	.	non-ssc	.	H6PD:NM_001282587:exon5:c.G1240A:p.G414S,H6PD:NM_004285:exon5:c.G1207A:p.G403S	0.0002	.	.	.	0.001	.	2.49e-05	9.8e-05	0	0	0	3.03e-05	0	0	.	.	.	.	.	rs377461550	.	.	.	.	.	.
199953	1p36.22	1	9667839	9667839	C	T	C>T	TMEM201	exonic	nonsynonymous SNV	DDD4K.03695	DDD_2017	28135719	4293	0	exome	Developmental Delay (DD)	psychiatric disorder	not_available	.	non-ssc	.	TMEM201:NM_001130924:exon7:c.C1385T:p.T462I	.	.	.	.	.	.	.	.	.	.	.	.	.	.	.	.	.	.	.	.	.	.	.	.	.	.
5394	1p36.22	1	11137665	11137665	C	A	C>A	EXOSC10	exonic	nonsynonymous SNV	DDD4K.03822	DDD_2017	28135719	4293	0	exome	Developmental Delay (DD)	psychiatric disorder	not_available	.	non-ssc	.	EXOSC10:NM_001001998:exon15:c.G1793T:p.S598I,EXOSC10:NM_002685:exon15:c.G1793T:p.S598I	.	.	.	.	.	.	8.25e-06	0	8.65e-05	0	0	0	0	0	.	.	.	.	.	rs770600679	.	.	.	.	.	.
2475	1p36.22	1	11190804	11190804	C	T	C>T	MTOR	exonic	nonsynonymous SNV	DDD4K.04241	DDD_2017	28135719	4293	0	exome	Developmental Delay (DD)	psychiatric disorder	not_available	.	non-ssc	.	MTOR:NM_004958:exon39:c.G5395A:p.E1799K	.	.	.	.	.	.	.	.	.	.	.	.	.	.	.	.	.	.	.	rs863225264	COSM180789	1(pancreas);1(prostate);1(cervix);1(large_intestine);1(central_nervous_system);5(endometrium)	Pathogenic|Pathogenic	Smith-Kingsmore_syndrome|not_provided	RCV000201885.1|RCV000255268.2	MedGen:OMIM|MedGen
10218	1p36.22	1	11249887	11249887	T	C	T>C	ANGPTL7	exonic	nonsynonymous SNV	DDD4K.01618	DDD_2017	28135719	4293	0	exome	Developmental Delay (DD)	psychiatric disorder	not_available	.	non-ssc	.	ANGPTL7:NM_021146:exon1:c.T251C:p.L84P	.	.	.	.	.	.	.	.	.	.	.	.	.	.	.	.	.	.	.	.	.	.	.	.	.	.
57540	1p36.22	1	11561114	11561114	A	C	A>C	DISP3	exonic	nonsynonymous SNV	DDD4K.03719	DDD_2017	28135719	4293	0	exome	Developmental Delay (DD)	psychiatric disorder	not_available	.	non-ssc	.	DISP3:NM_020780:exon2:c.A65C:p.E22A	.	.	.	.	.	.	8.29e-06	0	0	0.0001	0	0	0	0	.	.	.	.	.	rs756957016	.	.	.	.	.	.
1185	1p36.22	1	11887199	11887199	T	C	T>C	CLCN6	exonic	nonsynonymous SNV	DDD4K.03173	DDD_2017	28135719	4293	0	exome	Developmental Delay (DD)	psychiatric disorder	not_available	.	non-ssc	.	CLCN6:NM_001256959:exon9:c.T695C:p.F232S,CLCN6:NM_001286:exon10:c.T761C:p.F254S	.	.	.	.	.	.	.	.	.	.	.	.	.	.	.	.	.	.	.	.	.	.	.	.	.	.
7133	1p36.22	1	12252991	12252991	G	A	G>A	TNFRSF1B	exonic	nonsynonymous SNV	DDD4K.03945	DDD_2017	28135719	4293	0	exome	Developmental Delay (DD)	psychiatric disorder	not_available	.	non-ssc	.	TNFRSF1B:NM_001066:exon6:c.G623A:p.S208N	.	.	.	.	.	.	.	.	.	.	.	.	.	.	.	.	.	.	.	.	.	.	.	.	.	.
55187	1p36.22	1	12337928	12337928	A	T	A>T	VPS13D	exonic	nonsynonymous SNV	DDD4K.02258	DDD_2017	28135719	4293	0	exome	Developmental Delay (DD)	psychiatric disorder	not_available	.	non-ssc	.	VPS13D:NM_015378:exon19:c.A4283T:p.D1428V,VPS13D:NM_018156:exon19:c.A4283T:p.D1428V	.	.	.	.	.	.	.	.	.	.	.	.	.	.	.	.	.	.	.	.	.	.	.	.	.	.
55187	1p36.22	1	12393421	12393421	T	C	T>C	VPS13D	exonic	nonsynonymous SNV	DDD4K.00905	DDD_2017	28135719	4293	0	exome	Developmental Delay (DD)	psychiatric disorder	not_available	.	non-ssc	.	VPS13D:NM_015378:exon38:c.T8426C:p.I2809T,VPS13D:NM_018156:exon38:c.T8426C:p.I2809T	.	.	.	.	.	.	.	.	.	.	.	.	.	.	.	.	.	.	.	.	.	.	.	.	.	.
7799	1p36.21	1	14108087	14108087	C	T	C>T	PRDM2	exonic	nonsynonymous SNV	DDD4K.00495	DDD_2017	28135719	4293	0	exome	Developmental Delay (DD)	psychiatric disorder	not_available	.	non-ssc	.	PRDM2:NM_001007257:exon3:c.C3194T:p.S1065F,PRDM2:NM_012231:exon8:c.C3797T:p.S1266F,PRDM2:NM_015866:exon8:c.C3797T:p.S1266F	.	.	.	.	.	.	.	.	.	.	.	.	.	.	.	.	.	.	.	.	.	.	.	.	.	.
55092	1p36.21	1	15541888	15541888	A	C	A>C	TMEM51	exonic	nonsynonymous SNV	DDD4K.00890	DDD_2017	28135719	4293	0	exome	Developmental Delay (DD)	psychiatric disorder	not_available	.	non-ssc	.	TMEM51:NM_001136217:exon2:c.A305C:p.H102P,TMEM51:NM_018022:exon2:c.A305C:p.H102P,TMEM51:NM_001136216:exon3:c.A305C:p.H102P,TMEM51:NM_001136218:exon3:c.A305C:p.H102P,TMEM51:NM_001319665:exon3:c.A305C:p.H102P	.	.	.	.	.	.	0.0002	0.0002	0	0	0.0014	0.0001	0	7.41e-05	.	.	.	.	.	rs767384768	COSM3984296	1(kidney)	.	.	.	.
84301	1p36.21	1	15976303	15976303	G	C	G>C	DDI2	exonic	nonsynonymous SNV	DDD4K.01551	DDD_2017	28135719	4293	0	exome	Developmental Delay (DD)	psychiatric disorder	not_available	.	non-ssc	.	DDI2:NM_032341:exon7:c.G978C:p.M326I	.	.	.	.	.	.	.	.	.	.	.	.	.	.	.	.	.	.	.	.	.	.	.	.	.	.
23207	1p36.21	1	16053880	16053880	G	A	G>A	PLEKHM2	exonic	nonsynonymous SNV	DDD4K.01522	DDD_2017	28135719	4293	0	exome	Developmental Delay (DD)	psychiatric disorder	not_available	.	non-ssc	.	PLEKHM2:NM_015164:exon9:c.G1313A:p.R438Q	.	.	.	.	.	.	8.3e-05	0.0005	0.0002	0	0	3.09e-05	0	9.07e-05	0.0001	0.0003	.	.	.	rs370277036	.	.	.	.	.	.
23013	1p36.13	1	16202753	16202753	G	A	G>A	SPEN	exonic	nonsynonymous SNV	DDD4K.03129	DDD_2017	28135719	4293	0	exome	Developmental Delay (DD)	psychiatric disorder	not_available	.	non-ssc	.	SPEN:NM_015001:exon3:c.G461A:p.R154Q	.	.	.	.	.	.	.	.	.	.	.	.	.	.	.	.	.	.	.	.	.	.	.	.	.	.
27129	1p36.13	1	16342139	16342139	C	T	C>T	HSPB7	exonic	nonsynonymous SNV	DDD4K.00376	DDD_2017	28135719	4293	0	exome	Developmental Delay (DD)	psychiatric disorder	not_available	.	non-ssc	.	HSPB7:NM_001349683:exon3:c.G461A:p.R154Q,HSPB7:NM_001349685:exon3:c.G431A:p.R144Q,HSPB7:NM_001349686:exon3:c.G407A:p.R136Q,HSPB7:NM_001349687:exon3:c.G434A:p.R145Q,HSPB7:NM_001349688:exon3:c.G446A:p.R149Q,HSPB7:NM_001349689:exon3:c.G464A:p.R155Q,HSPB7:NM_014424:exon3:c.G449A:p.R150Q,HSPB7:NM_001349682:exon4:c.G674A:p.R225Q	0.0002	.	0.0014	.	.	.	4.15e-05	0	0.0002	0.0002	0	1.51e-05	0	0	.	.	.	.	.	rs561575565	COSM4829622	1(cervix)	.	.	.	.
9696	1p36.13	1	17294863	17294863	G	A	G>A	CROCC	exonic	nonsynonymous SNV	DDD4K.03776	DDD_2017	28135719	4293	0	exome	Developmental Delay (DD)	psychiatric disorder	not_available	.	non-ssc	.	CROCC:NM_014675:exon31:c.G5026A:p.E1676K	.	.	.	.	.	.	.	.	.	.	.	.	.	.	.	.	.	.	.	rs868552656	.	.	.	.	.	.
51702	1p36.13	1	17609431	17609431	C	T	C>T	PADI3	exonic	nonsynonymous SNV	DDD4K.02299	DDD_2017	28135719	4293	0	exome	Developmental Delay (DD)	psychiatric disorder	not_available	.	non-ssc	.	PADI3:NM_016233:exon16:c.C1852T:p.R618W	0.0006	0.0023	.	.	.	.	0.0003	0.0032	0	0	0	3.04e-05	0	0	0.0016	0.0048	.	.	.	rs144763474	.	.	.	.	.	.
23569	1p36.13	1	17685893	17685893	T	C	T>C	PADI4	exonic	nonsynonymous SNV	DDD4K.01930	DDD_2017	28135719	4293	0	exome	Developmental Delay (DD)	psychiatric disorder	not_available	.	non-ssc	.	PADI4:NM_012387:exon15:c.T1748C:p.F583S	.	.	.	.	.	.	.	.	.	.	.	.	.	.	.	.	.	.	.	.	.	.	.	.	.	.
5081	1p36.13	1	18958102	18958102	C	A	C>A	PAX7	exonic	nonsynonymous SNV	DDD4K.03048	DDD_2017	28135719	4293	0	exome	Developmental Delay (DD)	psychiatric disorder	not_available	.	non-ssc	.	PAX7:NM_001135254:exon1:c.C5A:p.A2E,PAX7:NM_002584:exon1:c.C5A:p.A2E,PAX7:NM_013945:exon1:c.C5A:p.A2E	.	.	.	.	.	.	.	.	.	.	.	.	.	.	.	.	.	.	.	.	.	.	.	.	.	.
23352	1p36.13	1	19410998	19410998	G	A	G>A	UBR4	exonic	nonsynonymous SNV	DDD4K.04289	DDD_2017	28135719	4293	0	exome	Developmental Delay (DD)	psychiatric disorder	not_available	.	non-ssc	.	UBR4:NM_020765:exon102:c.C15008T:p.T5003I	.	.	.	.	.	.	8.44e-06	0	8.66e-05	0	0	0	0	0	.	.	.	.	.	rs776842584	.	.	.	.	.	.
23352	1p36.13	1	19492180	19492180	C	T	C>T	UBR4	exonic	nonsynonymous SNV	DDD4K.04241	DDD_2017	28135719	4293	0	exome	Developmental Delay (DD)	psychiatric disorder	not_available	.	non-ssc	.	UBR4:NM_020765:exon30:c.G4181A:p.R1394H	.	.	.	.	.	.	3.3e-05	0	0.0002	0	0	3e-05	0	0	.	.	.	.	.	rs756549939	COSM4781931;COSM30415;COSM4781930;COSM3400138	2(breast);2(central_nervous_system)	.	.	.	.
255104	1p36.13	1	20097931	20097931	T	C	T>C	TMCO4	exonic	nonsynonymous SNV	DDD4K.03418	DDD_2017	28135719	4293	0	exome	Developmental Delay (DD)	psychiatric disorder	not_available	.	non-ssc	.	TMCO4:NM_001349112:exon4:c.A224G:p.E75G,TMCO4:NM_001349113:exon5:c.A224G:p.E75G,TMCO4:NM_001349115:exon5:c.A224G:p.E75G,TMCO4:NM_181719:exon5:c.A224G:p.E75G,TMCO4:NM_001349114:exon6:c.A224G:p.E75G	.	.	.	.	.	.	0.0067	0.0133	0.0041	0.0074	0.0167	0.0068	0.01	0.0007	.	.	.	.	.	rs200726577	COSM1288488	1(autonomic_ganglia)	.	.	.	.
127731	1p36.12	1	20664259	20664259	G	A	G>A	VWA5B1	exonic	nonsynonymous SNV	DDD4K.02613	DDD_2017	28135719	4293	0	exome	Developmental Delay (DD)	psychiatric disorder	not_available	.	non-ssc	.	VWA5B1:NM_001039500:exon14:c.G2063A:p.R688Q	.	.	.	.	.	.	4.59e-05	0.0005	0	0	0	0	0	0	0.0002	0.0007	.	.	.	rs186598536	.	.	.	.	.	.
127731	1p36.12	1	20680670	20680670	G	A	G>A	VWA5B1	exonic	nonsynonymous SNV	DDD4K.03565	DDD_2017	28135719	4293	0	exome	Developmental Delay (DD)	psychiatric disorder	not_available	.	non-ssc	.	VWA5B1:NM_001039500:exon22:c.G3562A:p.A1188T	.	.	.	.	.	.	.	.	.	.	.	.	.	.	.	.	.	.	.	.	COSM5735311	1(small_intestine)	.	.	.	.
249	1p36.12	1	21900212	21900212	A	G	A>G	ALPL	exonic	nonsynonymous SNV	DDD4K.00694	DDD_2017	28135719	4293	0	exome	Developmental Delay (DD)	psychiatric disorder	not_available	.	non-ssc	.	ALPL:NM_001177520:exon7:c.A686G:p.D229G,ALPL:NM_001127501:exon8:c.A752G:p.D251G,ALPL:NM_000478:exon9:c.A917G:p.D306G	.	.	.	.	.	.	.	.	.	.	.	.	.	.	.	.	.	.	.	.	.	.	.	.	.	.
3339	1p36.12	1	22203087	22203087	G	T	G>T	HSPG2	exonic	nonsynonymous SNV	DDD4K.02583	DDD_2017	28135719	4293	0	exome	Developmental Delay (DD)	psychiatric disorder	not_available	.	non-ssc	.	HSPG2:NM_001291860:exon22:c.C2747A:p.T916N,HSPG2:NM_005529:exon22:c.C2744A:p.T915N	.	.	.	.	.	.	.	.	.	.	.	.	.	.	.	.	.	.	.	.	.	.	.	.	.	.
2046	1p36.12	1	22925511	22925511	G	A	G>A	EPHA8	exonic	nonsynonymous SNV	DDD4K.03908	DDD_2017	28135719	4293	0	exome	Developmental Delay (DD)	psychiatric disorder	not_available	.	non-ssc	.	EPHA8:NM_020526:exon13:c.G2359A:p.D787N	.	.	.	.	.	.	.	.	.	.	.	.	.	.	.	.	.	.	.	.	.	.	.	.	.	.
80818	1p36.12	1	23689346	23689346	G	A	G>A	ZNF436	exonic	nonsynonymous SNV	DDD4K.01787	DDD_2017	28135719	4293	0	exome	Developmental Delay (DD)	psychiatric disorder	not_available	.	non-ssc	.	ZNF436:NM_030634:exon3:c.C529T:p.R177C,ZNF436:NM_001077195:exon4:c.C529T:p.R177C	.	.	.	.	.	.	.	.	.	.	.	.	.	.	.	.	.	.	.	.	.	.	.	.	.	.
6924	1p36.11	1	24069944	24069944	G	A	G>A	ELOA	exonic	nonsynonymous SNV	DDD4K.00857	DDD_2017	28135719	4293	0	exome	Developmental Delay (DD)	psychiatric disorder	not_available	.	non-ssc	.	ELOA:NM_003198:exon1:c.G29A:p.R10K	.	.	.	.	.	.	.	.	.	.	.	.	.	.	.	.	.	.	.	.	.	.	.	.	.	.
58985	1p36.11	1	24454676	24454676	C	T	C>T	IL22RA1	exonic	nonsynonymous SNV	DDD4K.00400	DDD_2017	28135719	4293	0	exome	Developmental Delay (DD)	psychiatric disorder	not_available	.	non-ssc	.	IL22RA1:NM_021258:exon5:c.G625A:p.A209T	.	.	.	.	.	.	.	.	.	.	.	.	.	.	.	.	.	.	.	.	.	.	.	.	.	.
58985	1p36.11	1	24465097	24465097	T	C	T>C	IL22RA1	exonic	nonsynonymous SNV	DDD4K.01168	DDD_2017	28135719	4293	0	exome	Developmental Delay (DD)	psychiatric disorder	not_available	.	non-ssc	.	IL22RA1:NM_021258:exon2:c.A151G:p.T51A	.	.	.	.	.	.	.	.	.	.	.	.	.	.	.	.	.	.	.	.	.	.	.	.	.	.
163702	1p36.11	1	24495979	24495979	G	A	G>A	IFNLR1	exonic	nonsynonymous SNV	DDD4K.01876	DDD_2017	28135719	4293	0	exome	Developmental Delay (DD)	psychiatric disorder	not_available	.	non-ssc	.	IFNLR1:NM_170743:exon3:c.C295T:p.R99C,IFNLR1:NM_173064:exon3:c.C295T:p.R99C,IFNLR1:NM_173065:exon3:c.C295T:p.R99C	.	.	.	.	.	.	1.65e-05	0	0	0	0	1.5e-05	0	6.06e-05	0.0001	.	0.0001	.	.	rs375741486	COSM4863309;COSM906717	1(stomach);2(central_nervous_system);1(endometrium)	.	.	.	.
5051	1p36.11	1	26310483	26310483	C	T	C>T	PAFAH2	exonic	nonsynonymous SNV	DDD4K.02819	DDD_2017	28135719	4293	0	exome	Developmental Delay (DD)	psychiatric disorder	not_available	.	non-ssc	.	PAFAH2:NM_000437:exon6:c.G506A:p.R169H	.	.	.	.	.	.	3.3e-05	0.0002	0	0	0	3e-05	0	0	.	.	.	.	.	rs779769461	.	.	.	.	.	.
64793	1p36.11	1	26570804	26570804	C	T	C>T	CEP85	exonic	nonsynonymous SNV	DDD4K.02482	DDD_2017	28135719	4293	0	exome	Developmental Delay (DD)	psychiatric disorder	not_available	.	non-ssc	.	CEP85:NM_001319944:exon3:c.C203T:p.A68V,CEP85:NM_022778:exon3:c.C203T:p.A68V	.	.	.	.	.	.	8.26e-06	0	0	0	0	1.5e-05	0	0	.	.	.	.	.	rs556866666	.	.	.	.	.	.
64793	1p36.11	1	26581959	26581959	G	C	G>C	CEP85	exonic	nonsynonymous SNV	DDD4K.00915	DDD_2017	28135719	4293	0	exome	Developmental Delay (DD)	psychiatric disorder	not_available	.	non-ssc	.	CEP85:NM_001281517:exon3:c.G353C:p.G118A,CEP85:NM_001319944:exon4:c.G506C:p.G169A,CEP85:NM_022778:exon4:c.G506C:p.G169A	.	.	.	.	.	.	.	.	.	.	.	.	.	.	.	.	.	.	.	.	.	.	.	.	.	.
64793	1p36.11	1	26595958	26595958	A	C	A>C	CEP85	exonic	nonsynonymous SNV	DDD4K.03722	DDD_2017	28135719	4293	0	exome	Developmental Delay (DD)	psychiatric disorder	not_available	.	non-ssc	.	CEP85:NM_001281517:exon8:c.A1349C:p.D450A,CEP85:NM_001319944:exon9:c.A1502C:p.D501A,CEP85:NM_022778:exon9:c.A1502C:p.D501A	.	.	.	.	.	.	.	.	.	.	.	.	.	.	.	.	.	.	.	.	.	.	.	.	.	.
115572	1p36.11	1	27332607	27332607	A	G	A>G	FAM46B	exonic	nonsynonymous SNV	DDD4K.04163	DDD_2017	28135719	4293	0	exome	Developmental Delay (DD)	psychiatric disorder	not_available	.	non-ssc	.	FAM46B:NM_052943:exon2:c.T1106C:p.I369T	.	.	.	.	.	.	.	.	.	.	.	.	.	.	.	.	.	.	.	.	.	.	.	.	.	.
6548	1p36.11	1	27429731	27429731	C	T	C>T	SLC9A1	exonic	nonsynonymous SNV	DDD4K.00898	DDD_2017	28135719	4293	0	exome	Developmental Delay (DD)	psychiatric disorder	not_available	.	non-ssc	.	SLC9A1:NM_003047:exon6:c.G1558A:p.E520K	.	.	.	.	.	.	.	.	.	.	.	.	.	.	.	.	.	.	.	.	COSM1341467	1(skin);2(large_intestine)	.	.	.	.
23038	1p36.11	1	27609920	27609920	G	A	G>A	WDTC1	exonic	nonsynonymous SNV	DDD4K.00109	DDD_2017	28135719	4293	0	exome	Developmental Delay (DD)	psychiatric disorder	not_available	.	non-ssc	.	WDTC1:NM_001276252:exon5:c.G271A:p.A91T,WDTC1:NM_015023:exon5:c.G271A:p.A91T	.	.	.	.	.	.	8.27e-06	9.67e-05	0	0	0	0	0	0	.	.	.	.	.	rs770297610	COSM2235819	1(skin);1(large_intestine)	.	.	.	.
84065	1p36.11	1	27660486	27660486	G	A	G>A	TMEM222	exonic	nonsynonymous SNV	DDD4K.03471	DDD_2017	28135719	4293	0	exome	Developmental Delay (DD)	psychiatric disorder	not_available	.	non-ssc	.	TMEM222:NM_032125:exon4:c.G349A:p.G117R	0.0004	.	0.0014	.	0.001	.	0.0003	0.0003	0.0003	0.0003	0	0.0003	0	6.09e-05	0.0005	0.0002	0.0006	.	.	rs139999505	COSM6024687	2(large_intestine)	.	.	.	.
8547	1p36.11	1	27701224	27701224	C	A	C>A	FCN3	exonic	nonsynonymous SNV	DDD4K.00796	DDD_2017	28135719	4293	0	exome	Developmental Delay (DD)	psychiatric disorder	not_available	.	non-ssc	.	FCN3:NM_003665:exon1:c.G86T:p.C29F,FCN3:NM_173452:exon1:c.G86T:p.C29F	.	.	.	.	.	.	.	.	.	.	.	.	.	.	.	.	.	.	.	.	.	.	.	.	.	.
27293	1p35.3	1	28279854	28279854	G	A	G>A	SMPDL3B	exonic	nonsynonymous SNV	DDD4K.04162	DDD_2017	28135719	4293	0	exome	Developmental Delay (DD)	psychiatric disorder	not_available	.	non-ssc	.	SMPDL3B:NM_001009568:exon4:c.G502A:p.A168T,SMPDL3B:NM_014474:exon4:c.G502A:p.A168T	0.0012	0.0038	0.0014	.	.	.	0.0004	0.0039	0.0004	0	0	6.02e-05	0.0022	0	0.0011	0.0032	.	.	.	rs140461850	.	.	.	.	.	.
55113	1p35.3	1	28286666	28286666	C	T	C>T	XKR8	exonic	nonsynonymous SNV	DDD4K.03154	DDD_2017	28135719	4293	0	exome	Developmental Delay (DD)	psychiatric disorder	not_available	.	non-ssc	.	XKR8:NM_018053:exon1:c.C86T:p.T29I	0.0002	.	.	.	0.001	.	0.0008	0	0	0	0	0.0032	0	0	0.0012	0.0003	0.0016	.	.	rs201643190	.	.	.	.	.	.
65979	1p35.3	1	28819593	28819593	C	T	C>T	PHACTR4	exonic	nonsynonymous SNV	DDD4K.03089	DDD_2017	28135719	4293	0	exome	Developmental Delay (DD)	psychiatric disorder	not_available	.	non-ssc	.	PHACTR4:NM_023923:exon12:c.C2113T:p.H705Y,PHACTR4:NM_001048183:exon13:c.C2083T:p.H695Y,PHACTR4:NM_001350158:exon14:c.C2107T:p.H703Y,PHACTR4:NM_001350160:exon14:c.C2083T:p.H695Y,PHACTR4:NM_001350161:exon14:c.C2035T:p.H679Y,PHACTR4:NM_001350159:exon15:c.C2107T:p.H703Y	.	.	.	.	.	.	.	.	.	.	.	.	.	.	.	.	.	.	.	.	.	.	.	.	.	.
9672	1p35.2	1	31349878	31349878	A	G	A>G	SDC3	exonic	nonsynonymous SNV	DDD4K.00178	DDD_2017	28135719	4293	0	exome	Developmental Delay (DD)	psychiatric disorder	not_available	.	non-ssc	.	SDC3:NM_014654:exon3:c.T391C:p.S131P	.	.	.	.	.	.	.	.	.	.	.	.	.	.	.	.	.	.	.	.	.	.	.	.	.	.
576	1p35.2	1	32205574	32205574	T	A	T>A	ADGRB2	exonic	nonsynonymous SNV	DDD4K.02961	DDD_2017	28135719	4293	0	exome	Developmental Delay (DD)	psychiatric disorder	not_available	.	non-ssc	.	ADGRB2:NM_001294335:exon14:c.A2120T:p.D707V,ADGRB2:NM_001294336:exon14:c.A2120T:p.D707V	.	.	.	.	.	.	.	.	.	.	.	.	.	.	.	.	.	.	.	.	.	.	.	.	.	.
200081	1p35.1	1	32653667	32653667	C	T	C>T	TXLNA	exonic	nonsynonymous SNV	DDD4K.03922	DDD_2017	28135719	4293	0	exome	Developmental Delay (DD)	psychiatric disorder	not_available	.	non-ssc	.	TXLNA:NM_175852:exon5:c.C710T:p.A237V	.	.	.	.	.	.	.	.	.	.	.	.	.	.	.	.	.	.	.	.	.	.	.	.	.	.
55721	1p35.1	1	32671870	32671870	G	A	G>A	IQCC	exonic	nonsynonymous SNV	DDD4K.03925	DDD_2017	28135719	4293	0	exome	Developmental Delay (DD)	psychiatric disorder	not_available	.	non-ssc	.	IQCC:NM_001160042:exon2:c.G398A:p.R133H,IQCC:NM_018134:exon2:c.G158A:p.R53H	.	.	.	.	.	.	.	.	.	.	.	.	.	.	.	.	.	.	.	rs777178778	COSM3400679;COSM3400680	1(large_intestine);1(central_nervous_system)	.	.	.	.
728116	1p35.1	1	32936766	32936766	G	C	G>C	ZBTB8B	exonic	nonsynonymous SNV	DDD4K.00380	DDD_2017	28135719	4293	0	exome	Developmental Delay (DD)	psychiatric disorder	not_available	.	non-ssc	.	ZBTB8B:NM_001145720:exon2:c.G541C:p.E181Q	.	.	.	.	.	.	.	.	.	.	.	.	.	.	.	.	.	.	.	.	.	.	.	.	.	.
57648	1p35.1	1	33235735	33235735	C	T	C>T	KIAA1522	exonic	nonsynonymous SNV	DDD4K.00650	DDD_2017	28135719	4293	0	exome	Developmental Delay (DD)	psychiatric disorder	not_available	.	non-ssc	.	KIAA1522:NM_001198972:exon6:c.C778T:p.R260W,KIAA1522:NM_020888:exon6:c.C955T:p.R319W	.	.	.	.	.	.	.	.	.	.	.	.	.	.	.	.	.	.	.	.	.	.	.	.	.	.
2701	1p34.3	1	35260046	35260046	T	C	T>C	GJA4	exonic	nonsynonymous SNV	DDD4K.01473	DDD_2017	28135719	4293	0	exome	Developmental Delay (DD)	psychiatric disorder	not_available	.	non-ssc	.	GJA4:NM_002060:exon2:c.T232C:p.W78R	.	.	.	.	.	.	.	.	.	.	.	.	.	.	.	.	.	.	.	.	.	.	.	.	.	.
79830	1p34.3	1	35579202	35579202	G	A	G>A	ZMYM1	exonic	nonsynonymous SNV	DDD4K.03732	DDD_2017	28135719	4293	0	exome	Developmental Delay (DD)	psychiatric disorder	not_available	.	non-ssc	.	ZMYM1:NM_001319955:exon9:c.G1546A:p.E516K,ZMYM1:NM_001289089:exon10:c.G1714A:p.E572K,ZMYM1:NM_024772:exon10:c.G1771A:p.E591K,ZMYM1:NM_001289088:exon11:c.G1771A:p.E591K,ZMYM1:NM_001289090:exon11:c.G1771A:p.E591K,ZMYM1:NM_001289091:exon11:c.G691A:p.E231K	.	.	.	.	.	.	.	.	.	.	.	.	.	.	.	.	.	.	.	.	.	.	.	.	.	.
23154	1p34.3	1	36031059	36031059	G	A	G>A	NCDN	exonic	nonsynonymous SNV	DDD4K.02765	DDD_2017	28135719	4293	0	exome	Developmental Delay (DD)	psychiatric disorder	not_available	.	non-ssc	.	NCDN:NM_001014841:exon7:c.G1934A:p.R645H,NCDN:NM_014284:exon7:c.G1985A:p.R662H,NCDN:NM_001014839:exon8:c.G1985A:p.R662H	.	.	.	.	.	.	5.39e-05	0.0002	0.0002	0	0	2.5e-05	0	7.48e-05	.	.	.	.	.	rs760317998	.	.	.	.	.	.
26523	1p34.3	1	36367930	36367930	G	C	G>C	AGO1	exonic	nonsynonymous SNV	DDD4K.00969	DDD_2017	28135719	4293	0	exome	Developmental Delay (DD)	psychiatric disorder	not_available	.	non-ssc	.	AGO1:NM_001317123:exon11:c.G1164C:p.E388D,AGO1:NM_012199:exon11:c.G1389C:p.E463D	.	.	.	.	.	.	.	.	.	.	.	.	.	.	.	.	.	.	.	.	.	.	.	.	.	.
192669	1p34.3	1	36474596	36474596	C	T	C>T	AGO3	exonic	nonsynonymous SNV	DDD4K.03949	DDD_2017	28135719	4293	0	exome	Developmental Delay (DD)	psychiatric disorder	not_available	.	non-ssc	.	AGO3:NM_177422:exon6:c.C278T:p.P93L,AGO3:NM_024852:exon8:c.C980T:p.P327L	.	.	.	.	.	.	.	.	.	.	.	.	.	.	.	.	.	.	.	.	.	.	.	.	.	.
27285	1p34.3	1	36553387	36553387	A	G	A>G	TEKT2	exonic	nonsynonymous SNV	DDD4K.00154	DDD_2017	28135719	4293	0	exome	Developmental Delay (DD)	psychiatric disorder	not_available	.	non-ssc	.	TEKT2:NM_014466:exon9:c.A1058G:p.K353R	.	.	.	.	.	.	.	.	.	.	.	.	.	.	.	.	.	.	.	.	.	.	.	.	.	.
55194	1p34.3	1	36788042	36788042	C	T	C>T	EVA1B	exonic	nonsynonymous SNV	DDD4K.00809	DDD_2017	28135719	4293	0	exome	Developmental Delay (DD)	psychiatric disorder	not_available	.	non-ssc	.	EVA1B:NM_001304762:exon3:c.G352A:p.E118K,EVA1B:NM_018166:exon3:c.G352A:p.E118K	.	.	.	.	.	.	9.49e-06	0	0	0	0	1.73e-05	0	0	.	.	.	.	.	rs745604875	.	.	.	.	.	.
54955	1p34.3	1	38155401	38155401	G	T	G>T	C1orf109	exonic	nonsynonymous SNV	DDD4K.01494	DDD_2017	28135719	4293	0	exome	Developmental Delay (DD)	psychiatric disorder	not_available	.	non-ssc	.	C1orf109:NM_001303030:exon2:c.C338A:p.A113D,C1orf109:NM_001303031:exon2:c.C341A:p.A114D,C1orf109:NM_001350755:exon2:c.C341A:p.A114D,C1orf109:NM_001350756:exon2:c.C338A:p.A113D,C1orf109:NM_001350760:exon2:c.C152A:p.A51D,C1orf109:NM_001350761:exon2:c.C152A:p.A51D,C1orf109:NM_001350764:exon2:c.C152A:p.A51D,C1orf109:NM_001350769:exon2:c.C152A:p.A51D,C1orf109:NM_001350770:exon2:c.C152A:p.A51D,C1orf109…	.	.	.	.	.	.	7.54e-05	0.0001	8.67e-05	0	0	9.18e-05	0	6.07e-05	.	.	.	.	.	rs775429688	COSM1127020	1(breast);1(prostate);8(upper_aerodigestive_tract)	.	.	.	.
284656	1p34.3	1	38184063	38184063	C	A	C>A	EPHA10	exonic	nonsynonymous SNV	DDD4K.01050	DDD_2017	28135719	4293	0	exome	Developmental Delay (DD)	psychiatric disorder	not_available	.	non-ssc	.	EPHA10:NM_001099439:exon17:c.G3008T:p.G1003V	.	.	.	.	.	.	7.87e-05	0.0001	0	0	0	7.77e-05	0	0.0002	.	.	.	.	.	rs747802363	COSM5432009	2(oesophagus)	.	.	.	.
284656	1p34.3	1	38184063	38184063	C	A	C>A	EPHA10	exonic	nonsynonymous SNV	DDD4K.00548	DDD_2017	28135719	4293	0	exome	Developmental Delay (DD)	psychiatric disorder	not_available	.	non-ssc	.	EPHA10:NM_001099439:exon17:c.G3008T:p.G1003V	.	.	.	.	.	.	7.87e-05	0.0001	0	0	0	7.77e-05	0	0.0002	.	.	.	.	.	rs747802363	COSM5432009	2(oesophagus)	.	.	.	.
5453	1p34.3	1	38511134	38511134	A	G	A>G	POU3F1	exonic	nonsynonymous SNV	DDD4K.02275	DDD_2017	28135719	4293	0	exome	Developmental Delay (DD)	psychiatric disorder	not_available	.	non-ssc	.	POU3F1:NM_002699:exon1:c.T1282C:p.S428P	.	.	.	.	.	.	0	0	0	0	.	0	0	0	.	.	.	.	.	rs779469423	.	.	.	.	.	.
[truncated: 3,624 more rows]
[truncated: 104 more columns]

## Sheet: Sibling control dnMIs
EntrezID	cytoBand	Chr	Start	End	Ref	Alt	Variant	Gene.refGene	Func.refGene	ExonicFunc.refGene	SampleID	StudyName	PubmedID	NumProbands	NumControls	SequenceType	PrimaryPhenotype	DisorderCategory	Validation	sex	source	GeneDetail.refGene	AAChange.refGene	1000G_ALL	1000G_AFR	1000G_AMR	1000G_EAS	1000G_EUR	1000G_SAS	ExAC_Freq	ExAC_AFR	ExAC_AMR	ExAC_EAS	ExAC_FIN	ExAC_NFE	ExAC_OTH	ExAC_SAS	ESP6500si_ALL	ESP6500si_AA	ESP6500si_EA	CG46	NCI60	dbSNP	COSMIC_ID	COSMIC_DIS	ClinVar_SIG	ClinVar_DIS	ClinVar_ID	ClinVar_DB
[truncated: 2,074 more rows]
[truncated: 104 more columns]
