# Supplementary material for: A Comprehensive Study of De Novo Mutations on the Protein-Protein Interaction Interfaces Provides New Insights into Developmental Delay
Source: Biomolecules. 2022 Nov 6;12(11):1643. doi: 10.3390/biom12111643 (PMC9687726; doi:10.3390/biom12111643)
Supplement: Supplementary file 1 [file biomolecules-12-01643-s001.zip › Supplemental Table S2í¬í¬PsychiPPI in developmental delay.xlsx]

## Sheet: Sheet1
P1	P2	Source	P1_symbol	P2_symbol	P1_entrez_id	P2_entrez_id	P1_mutation_num	P1_PPI_mutation_num	P2_mutation_num	P2_PPI_mutation_num	P1_PPI_mutations	P2_PPI_mutations	P1_PPI_mutations_SIFT	P2_PPI_mutations_SIFT	P1_PPI_mutations_PolyPhen	P2_PPI_mutations_PolyPhen	p value	q value	PsychiPPI
O15144	Q14738	ECLAIR	ARPC2	PPP2R5D	10109	5528	0	0	16	14	[]	['p.E198K', 'p.E198K', 'p.E198K', 'p.P201R', 'p.E198K', 'p.E198K', 'p.E198K', 'p.E198K', 'p.E198K', 'p.E198K', 'p.E198K', 'p.E198K', 'p.E198K', 'p.P201R']	[]	['deleterious(0)', 'deleterious(0)', 'deleterious(0)', 'deleterious(0)', 'deleterious(0)', 'deleterious(0)', 'deleterious(0)', 'deleterious(0)', 'deleterious(0)', 'deleterious(0)', 'deleterious(0)', 'deleterious(0)', 'deleterious(0)', 'deleterious(0)']	[]	['probably_damaging(1)', 'probably_damaging(1)', 'probably_damaging(1)', 'possibly_damaging(0.789)', 'probably_damaging(1)', 'probably_damaging(1)', 'probably_damaging(1)', 'probably_damaging(1)', 'probably_damaging(1)', 'probably_damaging(1)', 'probably_damaging(1)', 'probably_damaging(1)', 'probably_damaging(1)', 'possibly_damaging(0.789)']	6.36e-17	3.54e-13	1
P62714	Q14738	ECLAIR	PPP2CB	PPP2R5D	5516	5528	0	0	16	14	[]	['p.E198K', 'p.E198K', 'p.E198K', 'p.P201R', 'p.E198K', 'p.E198K', 'p.E198K', 'p.E198K', 'p.E198K', 'p.E198K', 'p.E198K', 'p.E198K', 'p.E198K', 'p.P201R']	[]	['deleterious(0)', 'deleterious(0)', 'deleterious(0)', 'deleterious(0)', 'deleterious(0)', 'deleterious(0)', 'deleterious(0)', 'deleterious(0)', 'deleterious(0)', 'deleterious(0)', 'deleterious(0)', 'deleterious(0)', 'deleterious(0)', 'deleterious(0)']	[]	['probably_damaging(1)', 'probably_damaging(1)', 'probably_damaging(1)', 'possibly_damaging(0.789)', 'probably_damaging(1)', 'probably_damaging(1)', 'probably_damaging(1)', 'probably_damaging(1)', 'probably_damaging(1)', 'probably_damaging(1)', 'probably_damaging(1)', 'probably_damaging(1)', 'probably_damaging(1)', 'possibly_damaging(0.789)']	1.56e-16	4.33e-13	1
P67775	Q14738	ECLAIR	PPP2CA	PPP2R5D	5515	5528	0	0	16	14	[]	['p.E198K', 'p.E198K', 'p.E198K', 'p.P201R', 'p.E198K', 'p.E198K', 'p.E198K', 'p.E198K', 'p.E198K', 'p.E198K', 'p.E198K', 'p.E198K', 'p.E198K', 'p.P201R']	[]	['deleterious(0)', 'deleterious(0)', 'deleterious(0)', 'deleterious(0)', 'deleterious(0)', 'deleterious(0)', 'deleterious(0)', 'deleterious(0)', 'deleterious(0)', 'deleterious(0)', 'deleterious(0)', 'deleterious(0)', 'deleterious(0)', 'deleterious(0)']	[]	['probably_damaging(1)', 'probably_damaging(1)', 'probably_damaging(1)', 'possibly_damaging(0.789)', 'probably_damaging(1)', 'probably_damaging(1)', 'probably_damaging(1)', 'probably_damaging(1)', 'probably_damaging(1)', 'probably_damaging(1)', 'probably_damaging(1)', 'probably_damaging(1)', 'probably_damaging(1)', 'possibly_damaging(0.789)']	1.56e-16	4.33e-13	1
Q14738	Q9HD26	ECLAIR	PPP2R5D	GOPC	5528	57120	16	14	1	0	['p.E198K', 'p.E198K', 'p.E198K', 'p.P201R', 'p.E198K', 'p.E198K', 'p.E198K', 'p.E198K', 'p.E198K', 'p.E198K', 'p.E198K', 'p.E198K', 'p.E198K', 'p.P201R']	[]	['deleterious(0)', 'deleterious(0)', 'deleterious(0)', 'deleterious(0)', 'deleterious(0)', 'deleterious(0)', 'deleterious(0)', 'deleterious(0)', 'deleterious(0)', 'deleterious(0)', 'deleterious(0)', 'deleterious(0)', 'deleterious(0)', 'deleterious(0)']	[]	['probably_damaging(1)', 'probably_damaging(1)', 'probably_damaging(1)', 'possibly_damaging(0.789)', 'probably_damaging(1)', 'probably_damaging(1)', 'probably_damaging(1)', 'probably_damaging(1)', 'probably_damaging(1)', 'probably_damaging(1)', 'probably_damaging(1)', 'probably_damaging(1)', 'probably_damaging(1)', 'possibly_damaging(0.789)']	[]	3.62e-16	5.03e-13	1
P67870	Q14738	ECLAIR	CSNK2B	PPP2R5D	1460	5528	2	1	16	14	['"p.R86C', 'p.R86C"']	['p.E198K', 'p.E198K', 'p.E198K', 'p.P201R', 'p.E198K', 'p.E198K', 'p.E198K', 'p.E198K', 'p.E198K', 'p.E198K', 'p.E198K', 'p.E198K', 'p.E198K', 'p.P201R']	['deleterious(0)']	['deleterious(0)', 'deleterious(0)', 'deleterious(0)', 'deleterious(0)', 'deleterious(0)', 'deleterious(0)', 'deleterious(0)', 'deleterious(0)', 'deleterious(0)', 'deleterious(0)', 'deleterious(0)', 'deleterious(0)', 'deleterious(0)', 'deleterious(0)']	['probably_damaging(0.997)']	['probably_damaging(1)', 'probably_damaging(1)', 'probably_damaging(1)', 'possibly_damaging(0.789)', 'probably_damaging(1)', 'probably_damaging(1)', 'probably_damaging(1)', 'probably_damaging(1)', 'probably_damaging(1)', 'probably_damaging(1)', 'probably_damaging(1)', 'probably_damaging(1)', 'probably_damaging(1)', 'possibly_damaging(0.789)']	6.77e-16	7.53e-13	1
Q14738	Q9GZT8	ECLAIR	PPP2R5D	NIF3L1	5528	60491	16	14	0	0	['p.E198K', 'p.E198K', 'p.E198K', 'p.P201R', 'p.E198K', 'p.E198K', 'p.E198K', 'p.E198K', 'p.E198K', 'p.E198K', 'p.E198K', 'p.E198K', 'p.E198K', 'p.P201R']	[]	['deleterious(0)', 'deleterious(0)', 'deleterious(0)', 'deleterious(0)', 'deleterious(0)', 'deleterious(0)', 'deleterious(0)', 'deleterious(0)', 'deleterious(0)', 'deleterious(0)', 'deleterious(0)', 'deleterious(0)', 'deleterious(0)', 'deleterious(0)']	[]	['probably_damaging(1)', 'probably_damaging(1)', 'probably_damaging(1)', 'possibly_damaging(0.789)', 'probably_damaging(1)', 'probably_damaging(1)', 'probably_damaging(1)', 'probably_damaging(1)', 'probably_damaging(1)', 'probably_damaging(1)', 'probably_damaging(1)', 'probably_damaging(1)', 'probably_damaging(1)', 'possibly_damaging(0.789)']	[]	8e-16	7.42e-13	1
P49674	Q14738	ECLAIR	CSNK1E	PPP2R5D	1454	5528	1	0	16	14	[]	['p.E198K', 'p.E198K', 'p.E198K', 'p.P201R', 'p.E198K', 'p.E198K', 'p.E198K', 'p.E198K', 'p.E198K', 'p.E198K', 'p.E198K', 'p.E198K', 'p.E198K', 'p.P201R']	[]	['deleterious(0)', 'deleterious(0)', 'deleterious(0)', 'deleterious(0)', 'deleterious(0)', 'deleterious(0)', 'deleterious(0)', 'deleterious(0)', 'deleterious(0)', 'deleterious(0)', 'deleterious(0)', 'deleterious(0)', 'deleterious(0)', 'deleterious(0)']	[]	['probably_damaging(1)', 'probably_damaging(1)', 'probably_damaging(1)', 'possibly_damaging(0.789)', 'probably_damaging(1)', 'probably_damaging(1)', 'probably_damaging(1)', 'probably_damaging(1)', 'probably_damaging(1)', 'probably_damaging(1)', 'probably_damaging(1)', 'probably_damaging(1)', 'probably_damaging(1)', 'possibly_damaging(0.789)']	1.17e-15	9.3e-13	1
Q14738	Q9Y371	ECLAIR	PPP2R5D	SH3GLB1	5528	51100	16	14	0	0	['p.E198K', 'p.E198K', 'p.E198K', 'p.P201R', 'p.E198K', 'p.E198K', 'p.E198K', 'p.E198K', 'p.E198K', 'p.E198K', 'p.E198K', 'p.E198K', 'p.E198K', 'p.P201R']	[]	['deleterious(0)', 'deleterious(0)', 'deleterious(0)', 'deleterious(0)', 'deleterious(0)', 'deleterious(0)', 'deleterious(0)', 'deleterious(0)', 'deleterious(0)', 'deleterious(0)', 'deleterious(0)', 'deleterious(0)', 'deleterious(0)', 'deleterious(0)']	[]	['probably_damaging(1)', 'probably_damaging(1)', 'probably_damaging(1)', 'possibly_damaging(0.789)', 'probably_damaging(1)', 'probably_damaging(1)', 'probably_damaging(1)', 'probably_damaging(1)', 'probably_damaging(1)', 'probably_damaging(1)', 'probably_damaging(1)', 'probably_damaging(1)', 'probably_damaging(1)', 'possibly_damaging(0.789)']	[]	1.17e-15	9.3e-13	1
O96004	Q14738	ECLAIR	HAND1	PPP2R5D	9421	5528	0	0	16	12	[]	['p.E198K', 'p.E198K', 'p.E198K', 'p.E198K', 'p.E198K', 'p.E198K', 'p.E198K', 'p.E198K', 'p.E198K', 'p.E198K', 'p.E198K', 'p.E198K']	[]	['deleterious(0)', 'deleterious(0)', 'deleterious(0)', 'deleterious(0)', 'deleterious(0)', 'deleterious(0)', 'deleterious(0)', 'deleterious(0)', 'deleterious(0)', 'deleterious(0)', 'deleterious(0)', 'deleterious(0)']	[]	['probably_damaging(1)', 'probably_damaging(1)', 'probably_damaging(1)', 'probably_damaging(1)', 'probably_damaging(1)', 'probably_damaging(1)', 'probably_damaging(1)', 'probably_damaging(1)', 'probably_damaging(1)', 'probably_damaging(1)', 'probably_damaging(1)', 'probably_damaging(1)']	2.91e-15	1.8e-12	1
O15143	Q14738	ECLAIR	ARPC1B	PPP2R5D	10095	5528	0	0	16	14	[]	['p.E198K', 'p.E198K', 'p.E198K', 'p.P201R', 'p.E198K', 'p.E198K', 'p.E198K', 'p.E198K', 'p.E198K', 'p.E198K', 'p.E198K', 'p.E198K', 'p.E198K', 'p.P201R']	[]	['deleterious(0)', 'deleterious(0)', 'deleterious(0)', 'deleterious(0)', 'deleterious(0)', 'deleterious(0)', 'deleterious(0)', 'deleterious(0)', 'deleterious(0)', 'deleterious(0)', 'deleterious(0)', 'deleterious(0)', 'deleterious(0)', 'deleterious(0)']	[]	['probably_damaging(1)', 'probably_damaging(1)', 'probably_damaging(1)', 'possibly_damaging(0.789)', 'probably_damaging(1)', 'probably_damaging(1)', 'probably_damaging(1)', 'probably_damaging(1)', 'probably_damaging(1)', 'probably_damaging(1)', 'probably_damaging(1)', 'probably_damaging(1)', 'probably_damaging(1)', 'possibly_damaging(0.789)']	3.45e-15	1.92e-12	1
P39748	Q14738	ECLAIR	FEN1	PPP2R5D	2237	5528	0	0	16	14	[]	['p.E198K', 'p.E198K', 'p.E198K', 'p.P201R', 'p.E198K', 'p.E198K', 'p.E198K', 'p.E198K', 'p.E198K', 'p.E198K', 'p.E198K', 'p.E198K', 'p.E198K', 'p.P201R']	[]	['deleterious(0)', 'deleterious(0)', 'deleterious(0)', 'deleterious(0)', 'deleterious(0)', 'deleterious(0)', 'deleterious(0)', 'deleterious(0)', 'deleterious(0)', 'deleterious(0)', 'deleterious(0)', 'deleterious(0)', 'deleterious(0)', 'deleterious(0)']	[]	['probably_damaging(1)', 'probably_damaging(1)', 'probably_damaging(1)', 'possibly_damaging(0.789)', 'probably_damaging(1)', 'probably_damaging(1)', 'probably_damaging(1)', 'probably_damaging(1)', 'probably_damaging(1)', 'probably_damaging(1)', 'probably_damaging(1)', 'probably_damaging(1)', 'probably_damaging(1)', 'possibly_damaging(0.789)']	3.45e-15	1.92e-12	1
O96017	Q14738	ECLAIR	CHEK2	PPP2R5D	11200	5528	0	0	16	14	[]	['p.E198K', 'p.E198K', 'p.E198K', 'p.P201R', 'p.E198K', 'p.E198K', 'p.E198K', 'p.E198K', 'p.E198K', 'p.E198K', 'p.E198K', 'p.E198K', 'p.E198K', 'p.P201R']	[]	['deleterious(0)', 'deleterious(0)', 'deleterious(0)', 'deleterious(0)', 'deleterious(0)', 'deleterious(0)', 'deleterious(0)', 'deleterious(0)', 'deleterious(0)', 'deleterious(0)', 'deleterious(0)', 'deleterious(0)', 'deleterious(0)', 'deleterious(0)']	[]	['probably_damaging(1)', 'probably_damaging(1)', 'probably_damaging(1)', 'possibly_damaging(0.789)', 'probably_damaging(1)', 'probably_damaging(1)', 'probably_damaging(1)', 'probably_damaging(1)', 'probably_damaging(1)', 'probably_damaging(1)', 'probably_damaging(1)', 'probably_damaging(1)', 'probably_damaging(1)', 'possibly_damaging(0.789)']	4.86e-15	2.25e-12	1
P63151	Q14738	ECLAIR	PPP2R2A	PPP2R5D	5520	5528	0	0	16	14	[]	['p.E198K', 'p.E198K', 'p.E198K', 'p.P201R', 'p.E198K', 'p.E198K', 'p.E198K', 'p.E198K', 'p.E198K', 'p.E198K', 'p.E198K', 'p.E198K', 'p.E198K', 'p.P201R']	[]	['deleterious(0)', 'deleterious(0)', 'deleterious(0)', 'deleterious(0)', 'deleterious(0)', 'deleterious(0)', 'deleterious(0)', 'deleterious(0)', 'deleterious(0)', 'deleterious(0)', 'deleterious(0)', 'deleterious(0)', 'deleterious(0)', 'deleterious(0)']	[]	['probably_damaging(1)', 'probably_damaging(1)', 'probably_damaging(1)', 'possibly_damaging(0.789)', 'probably_damaging(1)', 'probably_damaging(1)', 'probably_damaging(1)', 'probably_damaging(1)', 'probably_damaging(1)', 'probably_damaging(1)', 'probably_damaging(1)', 'probably_damaging(1)', 'probably_damaging(1)', 'possibly_damaging(0.789)']	4.86e-15	2.25e-12	1
Q06830	Q14738	ECLAIR	PRDX1	PPP2R5D	5052	5528	0	0	16	14	[]	['p.E198K', 'p.E198K', 'p.E198K', 'p.P201R', 'p.E198K', 'p.E198K', 'p.E198K', 'p.E198K', 'p.E198K', 'p.E198K', 'p.E198K', 'p.E198K', 'p.E198K', 'p.P201R']	[]	['deleterious(0)', 'deleterious(0)', 'deleterious(0)', 'deleterious(0)', 'deleterious(0)', 'deleterious(0)', 'deleterious(0)', 'deleterious(0)', 'deleterious(0)', 'deleterious(0)', 'deleterious(0)', 'deleterious(0)', 'deleterious(0)', 'deleterious(0)']	[]	['probably_damaging(1)', 'probably_damaging(1)', 'probably_damaging(1)', 'possibly_damaging(0.789)', 'probably_damaging(1)', 'probably_damaging(1)', 'probably_damaging(1)', 'probably_damaging(1)', 'probably_damaging(1)', 'probably_damaging(1)', 'probably_damaging(1)', 'probably_damaging(1)', 'probably_damaging(1)', 'possibly_damaging(0.789)']	4.86e-15	2.25e-12	1
Q14738	Q15172	ECLAIR	PPP2R5D	PPP2R5A	5528	5525	16	14	1	0	['p.E198K', 'p.E198K', 'p.E198K', 'p.P201R', 'p.E198K', 'p.E198K', 'p.E198K', 'p.E198K', 'p.E198K', 'p.E198K', 'p.E198K', 'p.E198K', 'p.E198K', 'p.P201R']	[]	['deleterious(0)', 'deleterious(0)', 'deleterious(0)', 'deleterious(0)', 'deleterious(0)', 'deleterious(0)', 'deleterious(0)', 'deleterious(0)', 'deleterious(0)', 'deleterious(0)', 'deleterious(0)', 'deleterious(0)', 'deleterious(0)', 'deleterious(0)']	[]	['probably_damaging(1)', 'probably_damaging(1)', 'probably_damaging(1)', 'possibly_damaging(0.789)', 'probably_damaging(1)', 'probably_damaging(1)', 'probably_damaging(1)', 'probably_damaging(1)', 'probably_damaging(1)', 'probably_damaging(1)', 'probably_damaging(1)', 'probably_damaging(1)', 'probably_damaging(1)', 'possibly_damaging(0.789)']	[]	4.86e-15	2.25e-12	1
P31350	Q14738	ECLAIR	RRM2	PPP2R5D	6241	5528	0	0	16	14	[]	['p.E198K', 'p.E198K', 'p.E198K', 'p.P201R', 'p.E198K', 'p.E198K', 'p.E198K', 'p.E198K', 'p.E198K', 'p.E198K', 'p.E198K', 'p.E198K', 'p.E198K', 'p.P201R']	[]	['deleterious(0)', 'deleterious(0)', 'deleterious(0)', 'deleterious(0)', 'deleterious(0)', 'deleterious(0)', 'deleterious(0)', 'deleterious(0)', 'deleterious(0)', 'deleterious(0)', 'deleterious(0)', 'deleterious(0)', 'deleterious(0)', 'deleterious(0)']	[]	['probably_damaging(1)', 'probably_damaging(1)', 'probably_damaging(1)', 'possibly_damaging(0.789)', 'probably_damaging(1)', 'probably_damaging(1)', 'probably_damaging(1)', 'probably_damaging(1)', 'probably_damaging(1)', 'probably_damaging(1)', 'probably_damaging(1)', 'probably_damaging(1)', 'probably_damaging(1)', 'possibly_damaging(0.789)']	6.79e-15	2.36e-12	1
Q14738	Q66LE6	ECLAIR	PPP2R5D	PPP2R2D	5528	55844	16	14	0	0	['p.E198K', 'p.E198K', 'p.E198K', 'p.P201R', 'p.E198K', 'p.E198K', 'p.E198K', 'p.E198K', 'p.E198K', 'p.E198K', 'p.E198K', 'p.E198K', 'p.E198K', 'p.P201R']	[]	['deleterious(0)', 'deleterious(0)', 'deleterious(0)', 'deleterious(0)', 'deleterious(0)', 'deleterious(0)', 'deleterious(0)', 'deleterious(0)', 'deleterious(0)', 'deleterious(0)', 'deleterious(0)', 'deleterious(0)', 'deleterious(0)', 'deleterious(0)']	[]	['probably_damaging(1)', 'probably_damaging(1)', 'probably_damaging(1)', 'possibly_damaging(0.789)', 'probably_damaging(1)', 'probably_damaging(1)', 'probably_damaging(1)', 'probably_damaging(1)', 'probably_damaging(1)', 'probably_damaging(1)', 'probably_damaging(1)', 'probably_damaging(1)', 'probably_damaging(1)', 'possibly_damaging(0.789)']	[]	6.79e-15	2.36e-12	1
Q14738	Q99471	ECLAIR	PPP2R5D	PFDN5	5528	5204	16	14	0	0	['p.E198K', 'p.E198K', 'p.E198K', 'p.P201R', 'p.E198K', 'p.E198K', 'p.E198K', 'p.E198K', 'p.E198K', 'p.E198K', 'p.E198K', 'p.E198K', 'p.E198K', 'p.P201R']	[]	['deleterious(0)', 'deleterious(0)', 'deleterious(0)', 'deleterious(0)', 'deleterious(0)', 'deleterious(0)', 'deleterious(0)', 'deleterious(0)', 'deleterious(0)', 'deleterious(0)', 'deleterious(0)', 'deleterious(0)', 'deleterious(0)', 'deleterious(0)']	[]	['probably_damaging(1)', 'probably_damaging(1)', 'probably_damaging(1)', 'possibly_damaging(0.789)', 'probably_damaging(1)', 'probably_damaging(1)', 'probably_damaging(1)', 'probably_damaging(1)', 'probably_damaging(1)', 'probably_damaging(1)', 'probably_damaging(1)', 'probably_damaging(1)', 'probably_damaging(1)', 'possibly_damaging(0.789)']	[]	6.79e-15	2.36e-12	1
P36404	Q14738	ECLAIR	ARL2	PPP2R5D	402	5528	0	0	16	14	[]	['p.E198K', 'p.E198K', 'p.E198K', 'p.P201R', 'p.E198K', 'p.E198K', 'p.E198K', 'p.E198K', 'p.E198K', 'p.E198K', 'p.E198K', 'p.E198K', 'p.E198K', 'p.P201R']	[]	['deleterious(0)', 'deleterious(0)', 'deleterious(0)', 'deleterious(0)', 'deleterious(0)', 'deleterious(0)', 'deleterious(0)', 'deleterious(0)', 'deleterious(0)', 'deleterious(0)', 'deleterious(0)', 'deleterious(0)', 'deleterious(0)', 'deleterious(0)']	[]	['probably_damaging(1)', 'probably_damaging(1)', 'probably_damaging(1)', 'possibly_damaging(0.789)', 'probably_damaging(1)', 'probably_damaging(1)', 'probably_damaging(1)', 'probably_damaging(1)', 'probably_damaging(1)', 'probably_damaging(1)', 'probably_damaging(1)', 'probably_damaging(1)', 'probably_damaging(1)', 'possibly_damaging(0.789)']	1.77e-14	5.17e-12	1
Q14738	Q49AN0	ECLAIR	PPP2R5D	CRY2	5528	1408	16	14	1	0	['p.E198K', 'p.E198K', 'p.E198K', 'p.P201R', 'p.E198K', 'p.E198K', 'p.E198K', 'p.E198K', 'p.E198K', 'p.E198K', 'p.E198K', 'p.E198K', 'p.E198K', 'p.P201R']	[]	['deleterious(0)', 'deleterious(0)', 'deleterious(0)', 'deleterious(0)', 'deleterious(0)', 'deleterious(0)', 'deleterious(0)', 'deleterious(0)', 'deleterious(0)', 'deleterious(0)', 'deleterious(0)', 'deleterious(0)', 'deleterious(0)', 'deleterious(0)']	[]	['probably_damaging(1)', 'probably_damaging(1)', 'probably_damaging(1)', 'possibly_damaging(0.789)', 'probably_damaging(1)', 'probably_damaging(1)', 'probably_damaging(1)', 'probably_damaging(1)', 'probably_damaging(1)', 'probably_damaging(1)', 'probably_damaging(1)', 'probably_damaging(1)', 'probably_damaging(1)', 'possibly_damaging(0.789)']	[]	1.77e-14	5.17e-12	1
Q14738	Q53YD8	ECLAIR	PPP2R5D	hCG_23373	5528	402	16	14	0	0	['p.E198K', 'p.E198K', 'p.E198K', 'p.P201R', 'p.E198K', 'p.E198K', 'p.E198K', 'p.E198K', 'p.E198K', 'p.E198K', 'p.E198K', 'p.E198K', 'p.E198K', 'p.P201R']	[]	['deleterious(0)', 'deleterious(0)', 'deleterious(0)', 'deleterious(0)', 'deleterious(0)', 'deleterious(0)', 'deleterious(0)', 'deleterious(0)', 'deleterious(0)', 'deleterious(0)', 'deleterious(0)', 'deleterious(0)', 'deleterious(0)', 'deleterious(0)']	[]	['probably_damaging(1)', 'probably_damaging(1)', 'probably_damaging(1)', 'possibly_damaging(0.789)', 'probably_damaging(1)', 'probably_damaging(1)', 'probably_damaging(1)', 'probably_damaging(1)', 'probably_damaging(1)', 'probably_damaging(1)', 'probably_damaging(1)', 'probably_damaging(1)', 'probably_damaging(1)', 'possibly_damaging(0.789)']	[]	1.77e-14	5.17e-12	1
P49366	Q14738	ECLAIR	DHPS	PPP2R5D	1725	5528	0	0	16	14	[]	['p.E198K', 'p.E198K', 'p.E198K', 'p.P201R', 'p.E198K', 'p.E198K', 'p.E198K', 'p.E198K', 'p.E198K', 'p.E198K', 'p.E198K', 'p.E198K', 'p.E198K', 'p.P201R']	[]	['deleterious(0)', 'deleterious(0)', 'deleterious(0)', 'deleterious(0)', 'deleterious(0)', 'deleterious(0)', 'deleterious(0)', 'deleterious(0)', 'deleterious(0)', 'deleterious(0)', 'deleterious(0)', 'deleterious(0)', 'deleterious(0)', 'deleterious(0)']	[]	['probably_damaging(1)', 'probably_damaging(1)', 'probably_damaging(1)', 'possibly_damaging(0.789)', 'probably_damaging(1)', 'probably_damaging(1)', 'probably_damaging(1)', 'probably_damaging(1)', 'probably_damaging(1)', 'probably_damaging(1)', 'probably_damaging(1)', 'probably_damaging(1)', 'probably_damaging(1)', 'possibly_damaging(0.789)']	3.22e-14	8.15e-12	1
Q14738	V9HW12	ECLAIR	PPP2R5D	HEL-S-2a	5528	7001	16	14	0	0	['p.E198K', 'p.E198K', 'p.E198K', 'p.P201R', 'p.E198K', 'p.E198K', 'p.E198K', 'p.E198K', 'p.E198K', 'p.E198K', 'p.E198K', 'p.E198K', 'p.E198K', 'p.P201R']	[]	['deleterious(0)', 'deleterious(0)', 'deleterious(0)', 'deleterious(0)', 'deleterious(0)', 'deleterious(0)', 'deleterious(0)', 'deleterious(0)', 'deleterious(0)', 'deleterious(0)', 'deleterious(0)', 'deleterious(0)', 'deleterious(0)', 'deleterious(0)']	[]	['probably_damaging(1)', 'probably_damaging(1)', 'probably_damaging(1)', 'possibly_damaging(0.789)', 'probably_damaging(1)', 'probably_damaging(1)', 'probably_damaging(1)', 'probably_damaging(1)', 'probably_damaging(1)', 'probably_damaging(1)', 'probably_damaging(1)', 'probably_damaging(1)', 'probably_damaging(1)', 'possibly_damaging(0.789)']	[]	3.22e-14	8.15e-12	1
P15927	Q14738	ECLAIR	RPA2	PPP2R5D	6118	5528	0	0	16	14	[]	['p.E198K', 'p.E198K', 'p.E198K', 'p.P201R', 'p.E198K', 'p.E198K', 'p.E198K', 'p.E198K', 'p.E198K', 'p.E198K', 'p.E198K', 'p.E198K', 'p.E198K', 'p.P201R']	[]	['deleterious(0)', 'deleterious(0)', 'deleterious(0)', 'deleterious(0)', 'deleterious(0)', 'deleterious(0)', 'deleterious(0)', 'deleterious(0)', 'deleterious(0)', 'deleterious(0)', 'deleterious(0)', 'deleterious(0)', 'deleterious(0)', 'deleterious(0)']	[]	['probably_damaging(1)', 'probably_damaging(1)', 'probably_damaging(1)', 'possibly_damaging(0.789)', 'probably_damaging(1)', 'probably_damaging(1)', 'probably_damaging(1)', 'probably_damaging(1)', 'probably_damaging(1)', 'probably_damaging(1)', 'probably_damaging(1)', 'probably_damaging(1)', 'probably_damaging(1)', 'possibly_damaging(0.789)']	9.98e-14	2.31e-11	1
A1L4K1	Q14738	ECLAIR	FSD2	PPP2R5D	123722	5528	0	0	16	12	[]	['p.E198K', 'p.E198K', 'p.E198K', 'p.E198K', 'p.E198K', 'p.E198K', 'p.E198K', 'p.E198K', 'p.E198K', 'p.E198K', 'p.E198K', 'p.E198K']	[]	['deleterious(0)', 'deleterious(0)', 'deleterious(0)', 'deleterious(0)', 'deleterious(0)', 'deleterious(0)', 'deleterious(0)', 'deleterious(0)', 'deleterious(0)', 'deleterious(0)', 'deleterious(0)', 'deleterious(0)']	[]	['probably_damaging(1)', 'probably_damaging(1)', 'probably_damaging(1)', 'probably_damaging(1)', 'probably_damaging(1)', 'probably_damaging(1)', 'probably_damaging(1)', 'probably_damaging(1)', 'probably_damaging(1)', 'probably_damaging(1)', 'probably_damaging(1)', 'probably_damaging(1)']	3.2e-11	7.12e-09	1
P10586	Q14738	ECLAIR	PTPRF	PPP2R5D	5792	5528	2	0	16	12	[]	['p.E198K', 'p.E198K', 'p.E198K', 'p.E198K', 'p.E198K', 'p.E198K', 'p.E198K', 'p.E198K', 'p.E198K', 'p.E198K', 'p.E198K', 'p.E198K']	[]	['deleterious(0)', 'deleterious(0)', 'deleterious(0)', 'deleterious(0)', 'deleterious(0)', 'deleterious(0)', 'deleterious(0)', 'deleterious(0)', 'deleterious(0)', 'deleterious(0)', 'deleterious(0)', 'deleterious(0)']	[]	['probably_damaging(1)', 'probably_damaging(1)', 'probably_damaging(1)', 'probably_damaging(1)', 'probably_damaging(1)', 'probably_damaging(1)', 'probably_damaging(1)', 'probably_damaging(1)', 'probably_damaging(1)', 'probably_damaging(1)', 'probably_damaging(1)', 'probably_damaging(1)']	3.2e-11	7.12e-09	1
Q13136	Q14738	ECLAIR	PPFIA1	PPP2R5D	8500	5528	0	0	16	12	[]	['p.E198K', 'p.E198K', 'p.E198K', 'p.E198K', 'p.E198K', 'p.E198K', 'p.E198K', 'p.E198K', 'p.E198K', 'p.E198K', 'p.E198K', 'p.E198K']	[]	['deleterious(0)', 'deleterious(0)', 'deleterious(0)', 'deleterious(0)', 'deleterious(0)', 'deleterious(0)', 'deleterious(0)', 'deleterious(0)', 'deleterious(0)', 'deleterious(0)', 'deleterious(0)', 'deleterious(0)']	[]	['probably_damaging(1)', 'probably_damaging(1)', 'probably_damaging(1)', 'probably_damaging(1)', 'probably_damaging(1)', 'probably_damaging(1)', 'probably_damaging(1)', 'probably_damaging(1)', 'probably_damaging(1)', 'probably_damaging(1)', 'probably_damaging(1)', 'probably_damaging(1)']	3.2e-11	7.12e-09	1
Q14738	Q562F6	ECLAIR	PPP2R5D	SGO2	5528	151246	16	12	0	0	['p.E198K', 'p.E198K', 'p.E198K', 'p.E198K', 'p.E198K', 'p.E198K', 'p.E198K', 'p.E198K', 'p.E198K', 'p.E198K', 'p.E198K', 'p.E198K']	[]	['deleterious(0)', 'deleterious(0)', 'deleterious(0)', 'deleterious(0)', 'deleterious(0)', 'deleterious(0)', 'deleterious(0)', 'deleterious(0)', 'deleterious(0)', 'deleterious(0)', 'deleterious(0)', 'deleterious(0)']	[]	['probably_damaging(1)', 'probably_damaging(1)', 'probably_damaging(1)', 'probably_damaging(1)', 'probably_damaging(1)', 'probably_damaging(1)', 'probably_damaging(1)', 'probably_damaging(1)', 'probably_damaging(1)', 'probably_damaging(1)', 'probably_damaging(1)', 'probably_damaging(1)']	[]	3.2e-11	7.12e-09	1
Q14738	Q6P3X3	ECLAIR	PPP2R5D	TTC27	5528	55622	16	12	1	0	['p.E198K', 'p.E198K', 'p.E198K', 'p.E198K', 'p.E198K', 'p.E198K', 'p.E198K', 'p.E198K', 'p.E198K', 'p.E198K', 'p.E198K', 'p.E198K']	[]	['deleterious(0)', 'deleterious(0)', 'deleterious(0)', 'deleterious(0)', 'deleterious(0)', 'deleterious(0)', 'deleterious(0)', 'deleterious(0)', 'deleterious(0)', 'deleterious(0)', 'deleterious(0)', 'deleterious(0)']	[]	['probably_damaging(1)', 'probably_damaging(1)', 'probably_damaging(1)', 'probably_damaging(1)', 'probably_damaging(1)', 'probably_damaging(1)', 'probably_damaging(1)', 'probably_damaging(1)', 'probably_damaging(1)', 'probably_damaging(1)', 'probably_damaging(1)', 'probably_damaging(1)']	[]	3.2e-11	7.12e-09	1
Q14738	Q86Y56	ECLAIR	PPP2R5D	DNAAF5	5528	54919	16	12	2	0	['p.E198K', 'p.E198K', 'p.E198K', 'p.E198K', 'p.E198K', 'p.E198K', 'p.E198K', 'p.E198K', 'p.E198K', 'p.E198K', 'p.E198K', 'p.E198K']	[]	['deleterious(0)', 'deleterious(0)', 'deleterious(0)', 'deleterious(0)', 'deleterious(0)', 'deleterious(0)', 'deleterious(0)', 'deleterious(0)', 'deleterious(0)', 'deleterious(0)', 'deleterious(0)', 'deleterious(0)']	[]	['probably_damaging(1)', 'probably_damaging(1)', 'probably_damaging(1)', 'probably_damaging(1)', 'probably_damaging(1)', 'probably_damaging(1)', 'probably_damaging(1)', 'probably_damaging(1)', 'probably_damaging(1)', 'probably_damaging(1)', 'probably_damaging(1)', 'probably_damaging(1)']	[]	3.2e-11	7.12e-09	1
Q14738	Q86YF9	ECLAIR	PPP2R5D	DZIP1	5528	22873	16	12	1	0	['p.E198K', 'p.E198K', 'p.E198K', 'p.E198K', 'p.E198K', 'p.E198K', 'p.E198K', 'p.E198K', 'p.E198K', 'p.E198K', 'p.E198K', 'p.E198K']	[]	['deleterious(0)', 'deleterious(0)', 'deleterious(0)', 'deleterious(0)', 'deleterious(0)', 'deleterious(0)', 'deleterious(0)', 'deleterious(0)', 'deleterious(0)', 'deleterious(0)', 'deleterious(0)', 'deleterious(0)']	[]	['probably_damaging(1)', 'probably_damaging(1)', 'probably_damaging(1)', 'probably_damaging(1)', 'probably_damaging(1)', 'probably_damaging(1)', 'probably_damaging(1)', 'probably_damaging(1)', 'probably_damaging(1)', 'probably_damaging(1)', 'probably_damaging(1)', 'probably_damaging(1)']	[]	3.2e-11	7.12e-09	1
Q14738	Q8N6Y0	ECLAIR	PPP2R5D	USHBP1	5528	83878	16	12	0	0	['p.E198K', 'p.E198K', 'p.E198K', 'p.E198K', 'p.E198K', 'p.E198K', 'p.E198K', 'p.E198K', 'p.E198K', 'p.E198K', 'p.E198K', 'p.E198K']	[]	['deleterious(0)', 'deleterious(0)', 'deleterious(0)', 'deleterious(0)', 'deleterious(0)', 'deleterious(0)', 'deleterious(0)', 'deleterious(0)', 'deleterious(0)', 'deleterious(0)', 'deleterious(0)', 'deleterious(0)']	[]	['probably_damaging(1)', 'probably_damaging(1)', 'probably_damaging(1)', 'probably_damaging(1)', 'probably_damaging(1)', 'probably_damaging(1)', 'probably_damaging(1)', 'probably_damaging(1)', 'probably_damaging(1)', 'probably_damaging(1)', 'probably_damaging(1)', 'probably_damaging(1)']	[]	3.2e-11	7.12e-09	1
Q14738	Q93052	ECLAIR	PPP2R5D	LPP	5528	4026	16	12	1	0	['p.E198K', 'p.E198K', 'p.E198K', 'p.E198K', 'p.E198K', 'p.E198K', 'p.E198K', 'p.E198K', 'p.E198K', 'p.E198K', 'p.E198K', 'p.E198K']	[]	['deleterious(0)', 'deleterious(0)', 'deleterious(0)', 'deleterious(0)', 'deleterious(0)', 'deleterious(0)', 'deleterious(0)', 'deleterious(0)', 'deleterious(0)', 'deleterious(0)', 'deleterious(0)', 'deleterious(0)']	[]	['probably_damaging(1)', 'probably_damaging(1)', 'probably_damaging(1)', 'probably_damaging(1)', 'probably_damaging(1)', 'probably_damaging(1)', 'probably_damaging(1)', 'probably_damaging(1)', 'probably_damaging(1)', 'probably_damaging(1)', 'probably_damaging(1)', 'probably_damaging(1)']	[]	3.2e-11	7.12e-09	1
Q14738	Q96PY6	ECLAIR	PPP2R5D	NEK1	5528	4750	16	12	0	0	['p.E198K', 'p.E198K', 'p.E198K', 'p.E198K', 'p.E198K', 'p.E198K', 'p.E198K', 'p.E198K', 'p.E198K', 'p.E198K', 'p.E198K', 'p.E198K']	[]	['deleterious(0)', 'deleterious(0)', 'deleterious(0)', 'deleterious(0)', 'deleterious(0)', 'deleterious(0)', 'deleterious(0)', 'deleterious(0)', 'deleterious(0)', 'deleterious(0)', 'deleterious(0)', 'deleterious(0)']	[]	['probably_damaging(1)', 'probably_damaging(1)', 'probably_damaging(1)', 'probably_damaging(1)', 'probably_damaging(1)', 'probably_damaging(1)', 'probably_damaging(1)', 'probably_damaging(1)', 'probably_damaging(1)', 'probably_damaging(1)', 'probably_damaging(1)', 'probably_damaging(1)']	[]	3.2e-11	7.12e-09	1
Q14738	Q99759	ECLAIR	PPP2R5D	MAP3K3	5528	4215	16	12	0	0	['p.E198K', 'p.E198K', 'p.E198K', 'p.E198K', 'p.E198K', 'p.E198K', 'p.E198K', 'p.E198K', 'p.E198K', 'p.E198K', 'p.E198K', 'p.E198K']	[]	['deleterious(0)', 'deleterious(0)', 'deleterious(0)', 'deleterious(0)', 'deleterious(0)', 'deleterious(0)', 'deleterious(0)', 'deleterious(0)', 'deleterious(0)', 'deleterious(0)', 'deleterious(0)', 'deleterious(0)']	[]	['probably_damaging(1)', 'probably_damaging(1)', 'probably_damaging(1)', 'probably_damaging(1)', 'probably_damaging(1)', 'probably_damaging(1)', 'probably_damaging(1)', 'probably_damaging(1)', 'probably_damaging(1)', 'probably_damaging(1)', 'probably_damaging(1)', 'probably_damaging(1)']	[]	3.2e-11	7.12e-09	1
Q14738	Q9ULT8	ECLAIR	PPP2R5D	HECTD1	5528	25831	16	12	0	0	['p.E198K', 'p.E198K', 'p.E198K', 'p.E198K', 'p.E198K', 'p.E198K', 'p.E198K', 'p.E198K', 'p.E198K', 'p.E198K', 'p.E198K', 'p.E198K']	[]	['deleterious(0)', 'deleterious(0)', 'deleterious(0)', 'deleterious(0)', 'deleterious(0)', 'deleterious(0)', 'deleterious(0)', 'deleterious(0)', 'deleterious(0)', 'deleterious(0)', 'deleterious(0)', 'deleterious(0)']	[]	['probably_damaging(1)', 'probably_damaging(1)', 'probably_damaging(1)', 'probably_damaging(1)', 'probably_damaging(1)', 'probably_damaging(1)', 'probably_damaging(1)', 'probably_damaging(1)', 'probably_damaging(1)', 'probably_damaging(1)', 'probably_damaging(1)', 'probably_damaging(1)']	[]	3.2e-11	7.12e-09	1
P30153	Q14738	ECLAIR	PPP2R1A	PPP2R5D	5518	5528	4	1	16	14	['p.M180T']	['p.E198K', 'p.E198K', 'p.E198K', 'p.P201R', 'p.E198K', 'p.E198K', 'p.E198K', 'p.E198K', 'p.E198K', 'p.E198K', 'p.E198K', 'p.E198K', 'p.E198K', 'p.P201R']	['deleterious(0)']	['deleterious(0)', 'deleterious(0)', 'deleterious(0)', 'deleterious(0)', 'deleterious(0)', 'deleterious(0)', 'deleterious(0)', 'deleterious(0)', 'deleterious(0)', 'deleterious(0)', 'deleterious(0)', 'deleterious(0)', 'deleterious(0)', 'deleterious(0)']	['possibly_damaging(0.932)']	['probably_damaging(1)', 'probably_damaging(1)', 'probably_damaging(1)', 'possibly_damaging(0.789)', 'probably_damaging(1)', 'probably_damaging(1)', 'probably_damaging(1)', 'probably_damaging(1)', 'probably_damaging(1)', 'probably_damaging(1)', 'probably_damaging(1)', 'probably_damaging(1)', 'probably_damaging(1)', 'possibly_damaging(0.789)']	2.03e-10	3.05e-08	1
Q15326	Q15326	PDB	ZMYND11	ZMYND11	10771	10771	6	5	6	5	['p.V493I', 'p.C520R', '"p.C489R', 'p.C557R"', 'p.R546W', 'p.R546W', 'p.R546W']	['p.V493I', 'p.C520R', '"p.C489R', 'p.C557R"', 'p.R546W', 'p.R546W', 'p.R546W']	['tolerated(0.799)', 'deleterious(0)', 'deleterious(0)', 'deleterious(0)', 'deleterious(0)']	['tolerated(0.799)', 'deleterious(0)', 'deleterious(0)', 'deleterious(0)', 'deleterious(0)']	['benign(0.33)', 'probably_damaging(0.999)', 'probably_damaging(1)', 'probably_damaging(1)', 'probably_damaging(1)']	['benign(0.33)', 'probably_damaging(0.999)', 'probably_damaging(1)', 'probably_damaging(1)', 'probably_damaging(1)']	5.92e-10	8.67e-08	1
Q14738	Q16526	ECLAIR	PPP2R5D	CRY1	5528	1407	16	14	0	0	['p.E198K', 'p.E198K', 'p.E198K', 'p.P201R', 'p.E198K', 'p.E198K', 'p.E198K', 'p.E198K', 'p.E198K', 'p.E198K', 'p.E198K', 'p.E198K', 'p.E198K', 'p.P201R']	[]	['deleterious(0)', 'deleterious(0)', 'deleterious(0)', 'deleterious(0)', 'deleterious(0)', 'deleterious(0)', 'deleterious(0)', 'deleterious(0)', 'deleterious(0)', 'deleterious(0)', 'deleterious(0)', 'deleterious(0)', 'deleterious(0)', 'deleterious(0)']	[]	['probably_damaging(1)', 'probably_damaging(1)', 'probably_damaging(1)', 'possibly_damaging(0.789)', 'probably_damaging(1)', 'probably_damaging(1)', 'probably_damaging(1)', 'probably_damaging(1)', 'probably_damaging(1)', 'probably_damaging(1)', 'probably_damaging(1)', 'probably_damaging(1)', 'probably_damaging(1)', 'possibly_damaging(0.789)']	[]	5.98e-10	8.53e-08	1
Q14738	Q96QU8	ECLAIR	PPP2R5D	XPO6	5528	23214	16	14	0	0	['p.E198K', 'p.E198K', 'p.E198K', 'p.P201R', 'p.E198K', 'p.E198K', 'p.E198K', 'p.E198K', 'p.E198K', 'p.E198K', 'p.E198K', 'p.E198K', 'p.E198K', 'p.P201R']	[]	['deleterious(0)', 'deleterious(0)', 'deleterious(0)', 'deleterious(0)', 'deleterious(0)', 'deleterious(0)', 'deleterious(0)', 'deleterious(0)', 'deleterious(0)', 'deleterious(0)', 'deleterious(0)', 'deleterious(0)', 'deleterious(0)', 'deleterious(0)']	[]	['probably_damaging(1)', 'probably_damaging(1)', 'probably_damaging(1)', 'possibly_damaging(0.789)', 'probably_damaging(1)', 'probably_damaging(1)', 'probably_damaging(1)', 'probably_damaging(1)', 'probably_damaging(1)', 'probably_damaging(1)', 'probably_damaging(1)', 'probably_damaging(1)', 'probably_damaging(1)', 'possibly_damaging(0.789)']	[]	5.98e-10	8.53e-08	1
Q14738	Q9P2J5	ECLAIR	PPP2R5D	LARS	5528	51520	16	14	1	0	['p.E198K', 'p.E198K', 'p.E198K', 'p.P201R', 'p.E198K', 'p.E198K', 'p.E198K', 'p.E198K', 'p.E198K', 'p.E198K', 'p.E198K', 'p.E198K', 'p.E198K', 'p.P201R']	[]	['deleterious(0)', 'deleterious(0)', 'deleterious(0)', 'deleterious(0)', 'deleterious(0)', 'deleterious(0)', 'deleterious(0)', 'deleterious(0)', 'deleterious(0)', 'deleterious(0)', 'deleterious(0)', 'deleterious(0)', 'deleterious(0)', 'deleterious(0)']	[]	['probably_damaging(1)', 'probably_damaging(1)', 'probably_damaging(1)', 'possibly_damaging(0.789)', 'probably_damaging(1)', 'probably_damaging(1)', 'probably_damaging(1)', 'probably_damaging(1)', 'probably_damaging(1)', 'probably_damaging(1)', 'probably_damaging(1)', 'probably_damaging(1)', 'probably_damaging(1)', 'possibly_damaging(0.789)']	[]	5.98e-10	8.53e-08	1
O75962	P63000	PDB	TRIO	RAC1	7204	5879	6	4	3	2	['p.P1461T', 'p.P1461L', 'p.P1461L', 'p.P1461T']	['"p.Y64D', 'p.Y64D"', 'p.P73L"', '"p.P73L']	['deleterious(0)', 'deleterious(0)', 'deleterious(0)', 'deleterious(0)']	['deleterious(0)', 'deleterious(0.019)']	['possibly_damaging(0.94)', 'probably_damaging(0.999)', 'probably_damaging(0.999)', 'possibly_damaging(0.94)']	['probably_damaging(1)', 'possibly_damaging(0.95)']	8.17e-09	1.08e-06	1
Q13224	Q13224	I3D	GRIN2B	GRIN2B	2904	2904	8	3	8	3	['p.E807K', 'p.S628F', 'p.N615K']	['p.E807K', 'p.S628F', 'p.N615K']	['unknown(.)', 'unknown(.)', 'unknown(.)']	['unknown(.)', 'unknown(.)', 'unknown(.)']	['probably_damaging(1)', 'probably_damaging(1)', 'probably_damaging(1)']	['probably_damaging(1)', 'probably_damaging(1)', 'probably_damaging(1)']	1.7e-06	0.00022	1
P68400	Q92793	ECLAIR	CSNK2A1	CREBBP	1457	1387	8	4	10	6	['"p.K62R', '"p.K62R', '"p.I38M', '"p.K62R']	['"p.Y613C', 'p.Y651C"', '"p.H1791D', '"p.C1788W', '"p.N1551K', '"p.C1370W', '"p.H1791D']	['deleterious(0.001)', 'deleterious(0.001)', 'deleterious(0.001)', 'deleterious(0.001)']	['deleterious(0)', 'deleterious(0.001)', 'deleterious(0)', 'deleterious(0.3)', 'deleterious(0)', 'deleterious(0.001)']	['possibly_damaging(0.887)', 'possibly_damaging(0.887)', 'probably_damaging(0.993)', 'possibly_damaging(0.887)']	['probably_damaging(1)', 'probably_damaging(0.991)', 'probably_damaging(0.999)', 'probably_damaging(0.997)', 'probably_damaging(1)', 'probably_damaging(0.991)']	2.98e-06	0.000377	1
Q14145	Q16236	PDB	KEAP1	NFE2L2	9817	4780	0	0	3	3	[]	['p.T80A"', 'p.T80A', 'p.G81D"', 'p.G81D', 'p.G81D"', 'p.G81D']	[]	['deleterious(0)', 'deleterious(0)', 'deleterious(0)']	[]	['probably_damaging(0.999)', 'probably_damaging(1)', 'probably_damaging(1)']	3.29e-06	0.000407	1
Q13627	Q5IJ48	PDB	DYRK1A	CRB2	1859	286204	7	4	2	0	['"p.L169P', 'p.D287V"', 'p.D287V', 'p.D287V"', 'p.D287V', '"p.L169P']	[]	['deleterious(0)', 'deleterious(0)', 'deleterious(0)', 'deleterious(0)']	[]	['probably_damaging(1)', 'probably_damaging(1)', 'probably_damaging(1)', 'probably_damaging(1)']	[]	6.43e-06	0.000778	1
O43525	O43526	I3D	KCNQ3	KCNQ2	3786	3785	4	1	16	5	['p.A356T"']	['"p.D282E', 'p.D282E"', 'p.D282E', 'p.A265T"', 'p.A265T', '"p.A265T', 'p.F304S', 'p.F304S"', '"p.F304S', 'p.F304S', 'p.F304S"', '"p.F304S', '"p.A265V', 'p.A265V', 'p.A265V"']	['deleterious(0.001)']	['deleterious(0.022)', 'deleterious(0)', 'deleterious(0)', 'deleterious(0)', 'deleterious(0)']	['probably_damaging(1)']	['probably_damaging(1)', 'possibly_damaging(0.678)', 'probably_damaging(1)', 'probably_damaging(1)', 'possibly_damaging(0.921)']	8.75e-06	0.00104	1
Q8TBN0	Q9UPW6	ECLAIR	RAB3IL1	SATB2	5866	23314	0	0	5	5	[]	['"p.G515S', 'p.G515S', 'p.G515S"', '"p.E402K', 'p.E402K"', 'p.E402K', 'p.R399H', '"p.R399H', 'p.R399H"', '"p.R389L', 'p.R389L', 'p.R389L"', '"p.R389C', 'p.R389C"', 'p.R389C']	[]	['deleterious(0)', 'deleterious(0.002)', 'deleterious(0.001)', 'deleterious(0.001)', 'deleterious(0)']	[]	['probably_damaging(1)', 'possibly_damaging(0.953)', 'probably_damaging(1)', 'possibly_damaging(0.831)', 'probably_damaging(1)']	1.05e-05	0.00122	1
P41227	P41227	ECLAIR	NAA10	NAA10	8260	8260	5	4	5	4	['p.R83C"', '"p.R83C', 'p.H120P"', '"p.H114P', 'p.R83C"', '"p.R83C', '"p.R82Q', 'p.R82Q"']	['p.R83C"', '"p.R83C', 'p.H120P"', '"p.H114P', 'p.R83C"', '"p.R83C', '"p.R82Q', 'p.R82Q"']	['deleterious(0.01)', 'deleterious(0.004)', 'deleterious(0.01)', 'deleterious(0)']	['deleterious(0.01)', 'deleterious(0.004)', 'deleterious(0.01)', 'deleterious(0)']	['possibly_damaging(0.598)', 'possibly_damaging(0.936)', 'possibly_damaging(0.598)', 'probably_damaging(1)']	['possibly_damaging(0.598)', 'possibly_damaging(0.936)', 'possibly_damaging(0.598)', 'probably_damaging(1)']	1.59e-05	0.0018	1
Q9H3D4	Q9UPW6	ECLAIR	TP63	SATB2	8626	23314	0	0	5	5	[]	['"p.G515S', 'p.G515S', 'p.G515S"', '"p.E402K', 'p.E402K"', 'p.E402K', 'p.R399H', '"p.R399H', 'p.R399H"', '"p.R389L', 'p.R389L', 'p.R389L"', '"p.R389C', 'p.R389C"', 'p.R389C']	[]	['deleterious(0)', 'deleterious(0.002)', 'deleterious(0.001)', 'deleterious(0.001)', 'deleterious(0)']	[]	['probably_damaging(1)', 'possibly_damaging(0.953)', 'probably_damaging(1)', 'possibly_damaging(0.831)', 'probably_damaging(1)']	1.86e-05	0.00207	1
Q12756	Q96EP0	ECLAIR	KIF1A	RNF31	547	55072	8	4	1	1	['p.R465W', 'p.R307P"', '"p.R307P', 'p.R307P', '"p.R307Q', 'p.R307Q"', 'p.R307Q', '"p.R307Q', 'p.R307Q"', 'p.R307Q']	['p.M791I"']	['deleterious(0.001)', 'deleterious(0.001)', 'deleterious(0.001)', 'deleterious(0.001)']	['deleterious(0.047)']	['probably_damaging(1)', 'probably_damaging(1)', 'probably_damaging(1)', 'probably_damaging(1)']	['possibly_damaging(0.587)']	2.13e-05	0.00232	1
Q8IVH2	Q9H334	ECLAIR	FOXP4	FOXP1	116113	27086	1	0	7	5	[]	['p.T471I', 'p.T469I', 'p.T469I"', 'p.T468I', 'p.T470I', 'p.P468L', 'p.A532E', 'p.A532E"', 'p.A534E', 'p.F501L', 'p.F499L', 'p.F498L', 'p.F499L"', 'p.F500L', 'p.P468L']	[]	['deleterious(0)', 'deleterious(0.001)', 'deleterious(0)', 'deleterious(0)', 'deleterious(0.001)']	[]	['probably_damaging(1)', 'probably_damaging(1)', 'probably_damaging(0.999)', 'probably_damaging(0.999)', 'probably_damaging(1)']	2.18e-05	0.00233	1
O00555	Q9UHX1	ECLAIR	CACNA1A	PUF60	773	22827	5	1	3	3	['p.D668E"']	['p.G448E', 'p.E164K', 'p.E163K', 'p.E138K', 'p.D159N"']	['deleterious(0.002)']	['deleterious(0)', 'deleterious(0.03)', 'tolerated(0.917)']	['probably_damaging(1)']	['probably_damaging(0.999)', 'probably_damaging(0.999)', 'benign(0.028)']	2.57e-05	0.0027	1
P17947	Q92793	ECLAIR	SPI1	CREBBP	6688	1387	1	1	10	6	['p.D187E"']	['"p.Y613C', 'p.Y651C"', '"p.H1791D', '"p.C1788W', '"p.N1551K', '"p.C1370W', '"p.H1791D']	['deleterious(0.364)']	['deleterious(0)', 'deleterious(0.001)', 'deleterious(0)', 'deleterious(0.3)', 'deleterious(0)', 'deleterious(0.001)']	['benign(0.106)']	['probably_damaging(1)', 'probably_damaging(0.991)', 'probably_damaging(0.999)', 'probably_damaging(0.997)', 'probably_damaging(1)', 'probably_damaging(0.991)']	2.95e-05	0.00304	1
O00571	P56537	ECLAIR	DDX3X	EIF6	1654	3692	15	7	0	0	['"p.C325R', '"p.C452Y', 'p.R534H', 'p.R534H"', 'p.R475G"', 'p.R475G', 'p.R475C"', 'p.R475C', 'p.V535I', 'p.V535I"', 'p.R534H', 'p.R534H"']	[]	['deleterious(0.002)', 'deleterious(0.002)', 'deleterious(0)', 'deleterious(0.002)', 'deleterious(0)', 'deleterious(0.035)', 'deleterious(0)']	[]	['probably_damaging(0.999)', 'probably_damaging(0.999)', 'probably_damaging(1)', 'probably_damaging(0.999)', 'probably_damaging(1)', 'possibly_damaging(0.532)', 'probably_damaging(1)']	[]	3.51e-05	0.00355	1
Q13363	Q9H334	ECLAIR	CTBP1	FOXP1	1487	27086	1	0	7	5	[]	['p.T471I', 'p.T469I', 'p.T469I"', 'p.T468I', 'p.T470I', 'p.P468L', 'p.A532E', 'p.A532E"', 'p.A534E', 'p.F501L', 'p.F499L', 'p.F498L', 'p.F499L"', 'p.F500L', 'p.P468L']	[]	['deleterious(0)', 'deleterious(0.001)', 'deleterious(0)', 'deleterious(0)', 'deleterious(0.001)']	[]	['probably_damaging(1)', 'probably_damaging(1)', 'probably_damaging(0.999)', 'probably_damaging(0.999)', 'probably_damaging(1)']	3.68e-05	0.00366	1
P25490	P51608	ECLAIR	YY1	MECP2	7528	4204	1	1	9	6	['p.K315E']	['p.T158M', '"p.R145C', 'p.R133C', '"p.R145H', 'p.R133H', '"p.R145C', 'p.R133C', '"p.R145C', 'p.R133C', 'p.T158M']	['deleterious(0.009)']	['deleterious(0.001)', 'deleterious(0)', 'deleterious(0)', 'deleterious(0)', 'deleterious(0)', 'deleterious(0.001)']	['probably_damaging(1)']	['probably_damaging(1)', 'probably_damaging(1)', 'probably_damaging(1)', 'probably_damaging(1)', 'probably_damaging(1)', 'probably_damaging(1)']	3.74e-05	0.00365	1
Q16531	Q9UHX1	ECLAIR	DDB1	PUF60	1642	22827	1	1	3	3	['p.R327L']	['p.G448E', 'p.E164K', 'p.E163K', 'p.E138K', 'p.D159N"']	['deleterious(0.035)']	['deleterious(0)', 'deleterious(0.03)', 'tolerated(0.917)']	['possibly_damaging(0.883)']	['probably_damaging(0.999)', 'probably_damaging(0.999)', 'benign(0.028)']	3.88e-05	0.00372	1
P35498	P61328	ECLAIR	SCN1A	FGF12	6323	2257	3	2	1	1	['p.I1922S"', '"p.I1922S', 'p.I1894S', 'p.I1922S"', '"p.I1922S', 'p.I1894S']	['"p.R114H']	['deleterious(0)', 'deleterious(0)']	['deleterious(0.075)']	['probably_damaging(1)', 'probably_damaging(1)']	['possibly_damaging(0.871)']	3.98e-05	0.00375	1
Q13627	Q13627	PDB	DYRK1A	DYRK1A	1859	1859	7	5	7	5	['"p.L169P', 'p.L198P', 'p.A277P"', 'p.A277P', 'p.R458Q', 'p.S337P', '"p.L169P', 'p.L198P']	['"p.L169P', 'p.L198P', 'p.A277P"', 'p.A277P', 'p.R458Q', 'p.S337P', '"p.L169P', 'p.L198P']	['deleterious(0)', 'deleterious(0.108)', 'deleterious(0)', 'deleterious(0)', 'deleterious(0)']	['deleterious(0)', 'deleterious(0.108)', 'deleterious(0)', 'deleterious(0)', 'deleterious(0)']	['probably_damaging(1)', 'probably_damaging(0.965)', 'probably_damaging(1)', 'probably_damaging(1)', 'probably_damaging(1)']	['probably_damaging(1)', 'probably_damaging(0.965)', 'probably_damaging(1)', 'probably_damaging(1)', 'probably_damaging(1)']	4e-05	0.0037	1
Q92793	Q99081	ECLAIR	CREBBP	TCF12	1387	6938	10	6	1	1	['"p.Y613C', 'p.Y651C"', '"p.H1791D', '"p.C1788W', '"p.N1551K', '"p.C1370W', '"p.H1791D']	['p.H607Q', 'p.H630Q', 'p.H631Q']	['deleterious(0)', 'deleterious(0.001)', 'deleterious(0)', 'deleterious(0.3)', 'deleterious(0)', 'deleterious(0.001)']	['deleterious(0)']	['probably_damaging(1)', 'probably_damaging(0.991)', 'probably_damaging(0.999)', 'probably_damaging(0.997)', 'probably_damaging(1)', 'probably_damaging(0.991)']	['probably_damaging(1)']	4.31e-05	0.00393	1
O00571	O00571	PDB	DDX3X	DDX3X	1654	1654	15	8	15	8	['"p.R360C', '"p.C452Y', 'p.R534H', 'p.R534H"', '"p.A217V', 'p.V535I', 'p.V535I"', 'p.P568L', 'p.P568L"', '"p.R360C', 'p.R534H', 'p.R534H"']	['"p.R360C', '"p.C452Y', 'p.R534H', 'p.R534H"', '"p.A217V', 'p.V535I', 'p.V535I"', 'p.P568L', 'p.P568L"', '"p.R360C', 'p.R534H', 'p.R534H"']	['deleterious(0)', 'deleterious(0.002)', 'deleterious(0)', 'deleterious(0.002)', 'deleterious(0.035)', 'deleterious(0)', 'deleterious(0)', 'deleterious(0)']	['deleterious(0)', 'deleterious(0.002)', 'deleterious(0)', 'deleterious(0.002)', 'deleterious(0.035)', 'deleterious(0)', 'deleterious(0)', 'deleterious(0)']	['probably_damaging(1)', 'probably_damaging(0.999)', 'probably_damaging(1)', 'probably_damaging(1)', 'possibly_damaging(0.532)', 'benign(0.024)', 'probably_damaging(1)', 'probably_damaging(1)']	['probably_damaging(1)', 'probably_damaging(0.999)', 'probably_damaging(1)', 'probably_damaging(1)', 'possibly_damaging(0.532)', 'benign(0.024)', 'probably_damaging(1)', 'probably_damaging(1)']	4.85e-05	0.00435	1
P22455	P22455	ECLAIR	FGFR4	FGFR4	2264	2264	2	2	2	2	['p.D507N', 'p.R567G', 'p.R635G', 'p.R635G"']	['p.D507N', 'p.R567G', 'p.R635G', 'p.R635G"']	['deleterious(0.348)', 'deleterious(0)']	['deleterious(0.348)', 'deleterious(0)']	['possibly_damaging(0.832)', 'probably_damaging(1)']	['possibly_damaging(0.832)', 'probably_damaging(1)']	5.17e-05	0.00456	1
Q8NHU6	Q8NHU6	PDB	TDRD7	TDRD7	23424	23424	1	1	1	1	['"p.T6I']	['"p.T6I']	['deleterious(0.005)']	['deleterious(0.005)']	['probably_damaging(0.999)']	['probably_damaging(0.999)']	8.29e-05	0.00721	1
P26951	Q9H334	ECLAIR	IL3RA	FOXP1	3563	27086	0	0	7	5	[]	['p.T471I', 'p.T469I', 'p.T469I"', 'p.T468I', 'p.T470I', 'p.P468L', 'p.P467L', 'p.A532E', 'p.A532E"', 'p.A534E', 'p.A531E', 'p.F501L', 'p.F499L', 'p.F498L', 'p.F499L"', 'p.F500L', 'p.P468L', 'p.P467L']	[]	['deleterious(0)', 'deleterious(0.001)', 'deleterious(0)', 'deleterious(0)', 'deleterious(0.001)']	[]	['probably_damaging(1)', 'probably_damaging(1)', 'probably_damaging(0.999)', 'probably_damaging(0.999)', 'probably_damaging(1)']	8.36e-05	0.00715	1
Q38SD2	Q9H334	ECLAIR	LRRK1	FOXP1	79705	27086	2	0	7	5	[]	['p.T471I', 'p.T469I', 'p.T469I"', 'p.T468I', 'p.T470I', 'p.P468L', 'p.P467L', 'p.A532E', 'p.A532E"', 'p.A534E', 'p.A531E', 'p.F501L', 'p.F499L', 'p.F498L', 'p.F499L"', 'p.F500L', 'p.P468L', 'p.P467L']	[]	['deleterious(0)', 'deleterious(0.001)', 'deleterious(0)', 'deleterious(0)', 'deleterious(0.001)']	[]	['probably_damaging(1)', 'probably_damaging(1)', 'probably_damaging(0.999)', 'probably_damaging(0.999)', 'probably_damaging(1)']	8.36e-05	0.00715	1
P15884	P15884	I3D	TCF4	TCF4	6925	6925	4	2	4	2	['p.R580W', 'p.R576W', 'p.R579W', 'p.R586W', 'p.R582Q', 'p.R576Q']	['p.R580W', 'p.R576W', 'p.R579W', 'p.R586W', 'p.R582Q', 'p.R576Q']	['deleterious(0)', 'deleterious(0.002)']	['deleterious(0)', 'deleterious(0.002)']	['probably_damaging(1)', 'probably_damaging(0.991)']	['probably_damaging(1)', 'probably_damaging(0.991)']	8.67e-05	0.00719	1
P51948	Q9H334	ECLAIR	MNAT1	FOXP1	4331	27086	0	0	7	5	[]	['p.T471I', 'p.T469I', 'p.T469I"', 'p.T468I', 'p.T470I', 'p.P468L', 'p.P467L', 'p.A532E', 'p.A533E', 'p.A532E"', 'p.A534E', 'p.A531E', 'p.F501L', 'p.F499L', 'p.F498L', 'p.F499L"', 'p.F500L', 'p.P468L', 'p.P467L']	[]	['deleterious(0)', 'deleterious(0.001)', 'deleterious(0)', 'deleterious(0)', 'deleterious(0.001)']	[]	['probably_damaging(1)', 'probably_damaging(1)', 'probably_damaging(0.999)', 'probably_damaging(0.999)', 'probably_damaging(1)']	9.08e-05	0.00743	1
P49286	P51608	ECLAIR	MTNR1B	MECP2	4544	4204	0	0	9	6	[]	['p.T158M', '"p.R145C', 'p.R133C', '"p.R145H', 'p.R133H', '"p.R145C', 'p.R133C', '"p.R145C', 'p.R133C', 'p.T158M']	[]	['deleterious(0.001)', 'deleterious(0)', 'deleterious(0)', 'deleterious(0)', 'deleterious(0)', 'deleterious(0.001)']	[]	['probably_damaging(1)', 'probably_damaging(1)', 'probably_damaging(1)', 'probably_damaging(1)', 'probably_damaging(1)', 'probably_damaging(1)']	9.45e-05	0.00762	1
Q8N3U4	Q8WVM7	ECLAIR	STAG2	STAG1	10735	10274	1	1	2	2	['p.R604Q"', '"p.R604Q', 'p.R604Q']	['p.R216G', 'p.R216G']	['deleterious(0.002)']	['deleterious(0)', 'deleterious(0)']	['probably_damaging(0.998)']	['probably_damaging(1)', 'probably_damaging(1)']	0.000110514	0.00878	1
O94916	O94916	PDB	NFAT5	NFAT5	10725	10725	1	1	1	1	['"p.E462D']	['"p.E462D']	['deleterious(0.012)']	['deleterious(0.012)']	['probably_damaging(0.965)']	['probably_damaging(0.965)']	0.000138228	0.0108	1
P41227	P42224	ECLAIR	NAA10	STAT1	8260	6772	5	4	0	0	['p.R83C"', '"p.R83C', '"p.H114P', 'p.R83C"', '"p.R83C', '"p.R82Q', 'p.R82Q"']	[]	['deleterious(0.01)', 'deleterious(0.004)', 'deleterious(0.01)', 'deleterious(0)']	[]	['possibly_damaging(0.598)', 'possibly_damaging(0.936)', 'possibly_damaging(0.598)', 'probably_damaging(1)']	[]	0.000161557	0.0125	1
P68400	P68400	PDB	CSNK2A1	CSNK2A1	1457	1457	8	6	8	6	['"p.K62R', '"p.K62R', '"p.F61I', 'p.R191Q', 'p.R191Q"', '"p.I38M', '"p.K62R']	['"p.K62R', '"p.K62R', '"p.F61I', 'p.R191Q', 'p.R191Q"', '"p.I38M', '"p.K62R']	['deleterious(0.001)', 'deleterious(0.001)', 'deleterious(0.004)', 'deleterious(0)', 'deleterious(0.001)', 'deleterious(0.001)']	['deleterious(0.001)', 'deleterious(0.001)', 'deleterious(0.004)', 'deleterious(0)', 'deleterious(0.001)', 'deleterious(0.001)']	['possibly_damaging(0.887)', 'possibly_damaging(0.887)', 'probably_damaging(0.999)', 'probably_damaging(0.999)', 'probably_damaging(0.993)', 'possibly_damaging(0.887)']	['possibly_damaging(0.887)', 'possibly_damaging(0.887)', 'probably_damaging(0.999)', 'probably_damaging(0.999)', 'probably_damaging(0.993)', 'possibly_damaging(0.887)']	0.000162329	0.0124	1
P67870	Q15910	ECLAIR	CSNK2B	EZH2	1460	2146	2	1	2	2	['"p.R86C', 'p.R86C"']	['p.R679H', 'p.R679C']	['deleterious(0)']	['deleterious(0.009)', 'deleterious(0)']	['probably_damaging(0.997)']	['probably_damaging(0.999)', 'probably_damaging(1)']	0.000170579	0.0128	1
O00571	Q16864	ECLAIR	DDX3X	ATP6V1F	1654	9296	15	6	0	0	['"p.C325R', '"p.R360C', 'p.R534H', 'p.R534H"', 'p.V535I', 'p.V535I"', '"p.R360C', 'p.R534H', 'p.R534H"']	[]	['deleterious(0.002)', 'deleterious(0)', 'deleterious(0)', 'deleterious(0.035)', 'deleterious(0)', 'deleterious(0)']	[]	['probably_damaging(0.999)', 'probably_damaging(1)', 'probably_damaging(1)', 'possibly_damaging(0.532)', 'probably_damaging(1)', 'probably_damaging(1)']	[]	0.000173302	0.0129	1
O75400	P51608	ECLAIR	PRPF40A	MECP2	55660	4204	1	0	9	6	[]	['p.T158M', '"p.R145C', 'p.R133C', '"p.R145H', 'p.R133H', '"p.R145C', 'p.R133C', '"p.R145C', 'p.R133C', 'p.T158M']	[]	['deleterious(0.001)', 'deleterious(0)', 'deleterious(0)', 'deleterious(0)', 'deleterious(0)', 'deleterious(0.001)']	[]	['probably_damaging(1)', 'probably_damaging(1)', 'probably_damaging(1)', 'probably_damaging(1)', 'probably_damaging(1)', 'probably_damaging(1)']	0.000193546	0.0142	1
P35713	P51608	ECLAIR	SOX18	MECP2	54345	4204	1	0	9	6	[]	['p.T158M', '"p.R145C', 'p.R133C', '"p.R145H', 'p.R133H', '"p.R145C', 'p.R133C', '"p.R145C', 'p.R133C', 'p.T158M']	[]	['deleterious(0.001)', 'deleterious(0)', 'deleterious(0)', 'deleterious(0)', 'deleterious(0)', 'deleterious(0.001)']	[]	['probably_damaging(1)', 'probably_damaging(1)', 'probably_damaging(1)', 'probably_damaging(1)', 'probably_damaging(1)', 'probably_damaging(1)']	0.000193546	0.0142	1
P51531	P51608	ECLAIR	SMARCA2	MECP2	6595	4204	10	0	9	6	[]	['p.T158M', '"p.R145C', 'p.R133C', '"p.R145H', 'p.R133H', '"p.R145C', 'p.R133C', '"p.R145C', 'p.R133C', 'p.T158M']	[]	['deleterious(0.001)', 'deleterious(0)', 'deleterious(0)', 'deleterious(0)', 'deleterious(0)', 'deleterious(0.001)']	[]	['probably_damaging(1)', 'probably_damaging(1)', 'probably_damaging(1)', 'probably_damaging(1)', 'probably_damaging(1)', 'probably_damaging(1)']	0.000193546	0.0142	1
O00571	P61254	ECLAIR	DDX3X	RPL26	1654	6154	15	6	0	0	['"p.C325R', '"p.R360C', 'p.R534H', 'p.R534H"', 'p.V535I', 'p.V535I"', '"p.R360C', 'p.R534H', 'p.R534H"']	[]	['deleterious(0.002)', 'deleterious(0)', 'deleterious(0)', 'deleterious(0.035)', 'deleterious(0)', 'deleterious(0)']	[]	['probably_damaging(0.999)', 'probably_damaging(1)', 'probably_damaging(1)', 'possibly_damaging(0.532)', 'probably_damaging(1)', 'probably_damaging(1)']	[]	0.000197835	0.0139	1
O00571	P68400	ECLAIR	DDX3X	CSNK2A1	1654	1457	15	6	8	0	['"p.C325R', '"p.R360C', 'p.R534H', 'p.R534H"', 'p.V535I', 'p.V535I"', '"p.R360C', 'p.R534H', 'p.R534H"']	[]	['deleterious(0.002)', 'deleterious(0)', 'deleterious(0)', 'deleterious(0.035)', 'deleterious(0)', 'deleterious(0)']	[]	['probably_damaging(0.999)', 'probably_damaging(1)', 'probably_damaging(1)', 'possibly_damaging(0.532)', 'probably_damaging(1)', 'probably_damaging(1)']	[]	0.000197835	0.0139	1
P21359	P21359	PDB	NF1	NF1	4763	4763	2	1	2	1	['p.R1830C"']	['p.R1830C"']	['deleterious(0)']	['deleterious(0)']	['probably_damaging(1)']	['probably_damaging(1)']	0.000217245	0.0149	1
F1D8N5	Q12756	ECLAIR	NR3C4	KIF1A	367	547	0	0	8	4	[]	['p.R465W', 'p.R307P"', '"p.R307P', 'p.R307P', '"p.R307Q', 'p.R307Q"', 'p.R307Q', '"p.R307Q', 'p.R307Q"', 'p.R307Q']	[]	['deleterious(0.001)', 'deleterious(0.001)', 'deleterious(0.001)', 'deleterious(0.001)']	[]	['probably_damaging(1)', 'probably_damaging(1)', 'probably_damaging(1)', 'probably_damaging(1)']	0.000235043	0.0159	1
F1D8Q5	Q12756	ECLAIR	NR2B1	KIF1A	6256	547	0	0	8	4	[]	['p.R465W', 'p.R307P"', '"p.R307P', 'p.R307P', '"p.R307Q', 'p.R307Q"', 'p.R307Q', '"p.R307Q', 'p.R307Q"', 'p.R307Q']	[]	['deleterious(0.001)', 'deleterious(0.001)', 'deleterious(0.001)', 'deleterious(0.001)']	[]	['probably_damaging(1)', 'probably_damaging(1)', 'probably_damaging(1)', 'probably_damaging(1)']	0.000235043	0.0159	1
O15162	Q12756	ECLAIR	PLSCR1	KIF1A	5359	547	0	0	8	4	[]	['p.R465W', 'p.R307P"', '"p.R307P', 'p.R307P', '"p.R307Q', 'p.R307Q"', 'p.R307Q', '"p.R307Q', 'p.R307Q"', 'p.R307Q']	[]	['deleterious(0.001)', 'deleterious(0.001)', 'deleterious(0.001)', 'deleterious(0.001)']	[]	['probably_damaging(1)', 'probably_damaging(1)', 'probably_damaging(1)', 'probably_damaging(1)']	0.000235043	0.0159	1
O43597	Q12756	ECLAIR	SPRY2	KIF1A	10253	547	0	0	8	4	[]	['p.R465W', 'p.R307P"', '"p.R307P', 'p.R307P', '"p.R307Q', 'p.R307Q"', 'p.R307Q', '"p.R307Q', 'p.R307Q"', 'p.R307Q']	[]	['deleterious(0.001)', 'deleterious(0.001)', 'deleterious(0.001)', 'deleterious(0.001)']	[]	['probably_damaging(1)', 'probably_damaging(1)', 'probably_damaging(1)', 'probably_damaging(1)']	0.000235043	0.0159	1
O76081	Q12756	ECLAIR	RGS20	KIF1A	8601	547	1	0	8	4	[]	['p.R465W', 'p.R307P"', '"p.R307P', 'p.R307P', '"p.R307Q', 'p.R307Q"', 'p.R307Q', '"p.R307Q', 'p.R307Q"', 'p.R307Q']	[]	['deleterious(0.001)', 'deleterious(0.001)', 'deleterious(0.001)', 'deleterious(0.001)']	[]	['probably_damaging(1)', 'probably_damaging(1)', 'probably_damaging(1)', 'probably_damaging(1)']	0.000235043	0.0159	1
O95153	Q12756	ECLAIR	TSPOAP1	KIF1A	9256	547	1	0	8	4	[]	['p.R465W', 'p.R307P"', '"p.R307P', 'p.R307P', '"p.R307Q', 'p.R307Q"', 'p.R307Q', '"p.R307Q', 'p.R307Q"', 'p.R307Q']	[]	['deleterious(0.001)', 'deleterious(0.001)', 'deleterious(0.001)', 'deleterious(0.001)']	[]	['probably_damaging(1)', 'probably_damaging(1)', 'probably_damaging(1)', 'probably_damaging(1)']	0.000235043	0.0159	1
P03372	Q12756	ECLAIR	ESR1	KIF1A	2099	547	0	0	8	4	[]	['p.R465W', 'p.R307P"', '"p.R307P', 'p.R307P', '"p.R307Q', 'p.R307Q"', 'p.R307Q', '"p.R307Q', 'p.R307Q"', 'p.R307Q']	[]	['deleterious(0.001)', 'deleterious(0.001)', 'deleterious(0.001)', 'deleterious(0.001)']	[]	['probably_damaging(1)', 'probably_damaging(1)', 'probably_damaging(1)', 'probably_damaging(1)']	0.000235043	0.0159	1
P08047	Q12756	ECLAIR	SP1	KIF1A	6667	547	0	0	8	4	[]	['p.R465W', 'p.R307P"', '"p.R307P', 'p.R307P', '"p.R307Q', 'p.R307Q"', 'p.R307Q', '"p.R307Q', 'p.R307Q"', 'p.R307Q']	[]	['deleterious(0.001)', 'deleterious(0.001)', 'deleterious(0.001)', 'deleterious(0.001)']	[]	['probably_damaging(1)', 'probably_damaging(1)', 'probably_damaging(1)', 'probably_damaging(1)']	0.000235043	0.0159	1
P10275	Q12756	ECLAIR	AR	KIF1A	367	547	0	0	8	4	[]	['p.R465W', 'p.R307P"', '"p.R307P', 'p.R307P', '"p.R307Q', 'p.R307Q"', 'p.R307Q', '"p.R307Q', 'p.R307Q"', 'p.R307Q']	[]	['deleterious(0.001)', 'deleterious(0.001)', 'deleterious(0.001)', 'deleterious(0.001)']	[]	['probably_damaging(1)', 'probably_damaging(1)', 'probably_damaging(1)', 'probably_damaging(1)']	0.000235043	0.0159	1
P14373	Q12756	ECLAIR	TRIM27	KIF1A	5987	547	0	0	8	4	[]	['p.R465W', 'p.R307P"', '"p.R307P', 'p.R307P', '"p.R307Q', 'p.R307Q"', 'p.R307Q', '"p.R307Q', 'p.R307Q"', 'p.R307Q']	[]	['deleterious(0.001)', 'deleterious(0.001)', 'deleterious(0.001)', 'deleterious(0.001)']	[]	['probably_damaging(1)', 'probably_damaging(1)', 'probably_damaging(1)', 'probably_damaging(1)']	0.000235043	0.0159	1
P19793	Q12756	ECLAIR	RXRA	KIF1A	6256	547	1	0	8	4	[]	['p.R465W', 'p.R307P"', '"p.R307P', 'p.R307P', '"p.R307Q', 'p.R307Q"', 'p.R307Q', '"p.R307Q', 'p.R307Q"', 'p.R307Q']	[]	['deleterious(0.001)', 'deleterious(0.001)', 'deleterious(0.001)', 'deleterious(0.001)']	[]	['probably_damaging(1)', 'probably_damaging(1)', 'probably_damaging(1)', 'probably_damaging(1)']	0.000235043	0.0159	1
P25788	Q12756	ECLAIR	PSMA3	KIF1A	5684	547	0	0	8	4	[]	['p.R465W', 'p.R307P"', '"p.R307P', 'p.R307P', '"p.R307Q', 'p.R307Q"', 'p.R307Q', '"p.R307Q', 'p.R307Q"', 'p.R307Q']	[]	['deleterious(0.001)', 'deleterious(0.001)', 'deleterious(0.001)', 'deleterious(0.001)']	[]	['probably_damaging(1)', 'probably_damaging(1)', 'probably_damaging(1)', 'probably_damaging(1)']	0.000235043	0.0159	1
P37231	Q12756	ECLAIR	PPARG	KIF1A	5468	547	0	0	8	4	[]	['p.R465W', 'p.R307P"', '"p.R307P', 'p.R307P', '"p.R307Q', 'p.R307Q"', 'p.R307Q', '"p.R307Q', 'p.R307Q"', 'p.R307Q']	[]	['deleterious(0.001)', 'deleterious(0.001)', 'deleterious(0.001)', 'deleterious(0.001)']	[]	['probably_damaging(1)', 'probably_damaging(1)', 'probably_damaging(1)', 'probably_damaging(1)']	0.000235043	0.0159	1
P51116	Q12756	ECLAIR	FXR2	KIF1A	9513	547	0	0	8	4	[]	['p.R465W', 'p.R307P"', '"p.R307P', 'p.R307P', '"p.R307Q', 'p.R307Q"', 'p.R307Q', '"p.R307Q', 'p.R307Q"', 'p.R307Q']	[]	['deleterious(0.001)', 'deleterious(0.001)', 'deleterious(0.001)', 'deleterious(0.001)']	[]	['probably_damaging(1)', 'probably_damaging(1)', 'probably_damaging(1)', 'probably_damaging(1)']	0.000235043	0.0159	1
Q12756	Q13064	ECLAIR	KIF1A	MKRN3	547	7681	8	4	0	0	['p.R465W', 'p.R307P"', '"p.R307P', 'p.R307P', '"p.R307Q', 'p.R307Q"', 'p.R307Q', '"p.R307Q', 'p.R307Q"', 'p.R307Q']	[]	['deleterious(0.001)', 'deleterious(0.001)', 'deleterious(0.001)', 'deleterious(0.001)']	[]	['probably_damaging(1)', 'probably_damaging(1)', 'probably_damaging(1)', 'probably_damaging(1)']	[]	0.000235043	0.0159	1
Q12756	Q13077	ECLAIR	KIF1A	TRAF1	547	7185	8	4	0	0	['p.R465W', 'p.R307P"', '"p.R307P', 'p.R307P', '"p.R307Q', 'p.R307Q"', 'p.R307Q', '"p.R307Q', 'p.R307Q"', 'p.R307Q']	[]	['deleterious(0.001)', 'deleterious(0.001)', 'deleterious(0.001)', 'deleterious(0.001)']	[]	['probably_damaging(1)', 'probably_damaging(1)', 'probably_damaging(1)', 'probably_damaging(1)']	[]	0.000235043	0.0159	1
Q12756	Q15648	ECLAIR	KIF1A	MED1	547	5469	8	4	0	0	['p.R465W', 'p.R307P"', '"p.R307P', 'p.R307P', '"p.R307Q', 'p.R307Q"', 'p.R307Q', '"p.R307Q', 'p.R307Q"', 'p.R307Q']	[]	['deleterious(0.001)', 'deleterious(0.001)', 'deleterious(0.001)', 'deleterious(0.001)']	[]	['probably_damaging(1)', 'probably_damaging(1)', 'probably_damaging(1)', 'probably_damaging(1)']	[]	0.000235043	0.0159	1
Q12756	Q15654	ECLAIR	KIF1A	TRIP6	547	7205	8	4	0	0	['p.R465W', 'p.R307P"', '"p.R307P', 'p.R307P', '"p.R307Q', 'p.R307Q"', 'p.R307Q', '"p.R307Q', 'p.R307Q"', 'p.R307Q']	[]	['deleterious(0.001)', 'deleterious(0.001)', 'deleterious(0.001)', 'deleterious(0.001)']	[]	['probably_damaging(1)', 'probably_damaging(1)', 'probably_damaging(1)', 'probably_damaging(1)']	[]	0.000235043	0.0159	1
Q12756	Q5JR59	ECLAIR	KIF1A	MTUS2	547	23281	8	4	1	0	['p.R465W', 'p.R307P"', '"p.R307P', 'p.R307P', '"p.R307Q', 'p.R307Q"', 'p.R307Q', '"p.R307Q', 'p.R307Q"', 'p.R307Q']	[]	['deleterious(0.001)', 'deleterious(0.001)', 'deleterious(0.001)', 'deleterious(0.001)']	[]	['probably_damaging(1)', 'probably_damaging(1)', 'probably_damaging(1)', 'probably_damaging(1)']	[]	0.000235043	0.0159	1
Q12756	Q63HR2	ECLAIR	KIF1A	TNS2	547	23371	8	4	0	0	['p.R465W', 'p.R307P"', '"p.R307P', 'p.R307P', '"p.R307Q', 'p.R307Q"', 'p.R307Q', '"p.R307Q', 'p.R307Q"', 'p.R307Q']	[]	['deleterious(0.001)', 'deleterious(0.001)', 'deleterious(0.001)', 'deleterious(0.001)']	[]	['probably_damaging(1)', 'probably_damaging(1)', 'probably_damaging(1)', 'probably_damaging(1)']	[]	0.000235043	0.0159	1
Q12756	Q7Z3S9	ECLAIR	KIF1A	NOTCH2NLA	547	388677	8	4	0	0	['p.R465W', 'p.R307P"', '"p.R307P', 'p.R307P', '"p.R307Q', 'p.R307Q"', 'p.R307Q', '"p.R307Q', 'p.R307Q"', 'p.R307Q']	[]	['deleterious(0.001)', 'deleterious(0.001)', 'deleterious(0.001)', 'deleterious(0.001)']	[]	['probably_damaging(1)', 'probably_damaging(1)', 'probably_damaging(1)', 'probably_damaging(1)']	[]	0.000235043	0.0159	1
Q12756	Q8HWS3	ECLAIR	KIF1A	RFX6	547	222546	8	4	1	0	['p.R465W', 'p.R307P"', '"p.R307P', 'p.R307P', '"p.R307Q', 'p.R307Q"', 'p.R307Q', '"p.R307Q', 'p.R307Q"', 'p.R307Q']	[]	['deleterious(0.001)', 'deleterious(0.001)', 'deleterious(0.001)', 'deleterious(0.001)']	[]	['probably_damaging(1)', 'probably_damaging(1)', 'probably_damaging(1)', 'probably_damaging(1)']	[]	0.000235043	0.0159	1
Q12756	Q93062	ECLAIR	KIF1A	RBPMS	547	11030	8	4	0	0	['p.R465W', 'p.R307P"', '"p.R307P', 'p.R307P', '"p.R307Q', 'p.R307Q"', 'p.R307Q', '"p.R307Q', 'p.R307Q"', 'p.R307Q']	[]	['deleterious(0.001)', 'deleterious(0.001)', 'deleterious(0.001)', 'deleterious(0.001)']	[]	['probably_damaging(1)', 'probably_damaging(1)', 'probably_damaging(1)', 'probably_damaging(1)']	[]	0.000235043	0.0159	1
Q12756	Q99750	ECLAIR	KIF1A	MDFI	547	4188	8	4	0	0	['p.R465W', 'p.R307P"', '"p.R307P', 'p.R307P', '"p.R307Q', 'p.R307Q"', 'p.R307Q', '"p.R307Q', 'p.R307Q"', 'p.R307Q']	[]	['deleterious(0.001)', 'deleterious(0.001)', 'deleterious(0.001)', 'deleterious(0.001)']	[]	['probably_damaging(1)', 'probably_damaging(1)', 'probably_damaging(1)', 'probably_damaging(1)']	[]	0.000235043	0.0159	1
Q12756	Q9UFG7	ECLAIR	KIF1A	DKFZp434K1772	547	54507	8	4	0	0	['p.R465W', 'p.R307P"', '"p.R307P', 'p.R307P', '"p.R307Q', 'p.R307Q"', 'p.R307Q', '"p.R307Q', 'p.R307Q"', 'p.R307Q']	[]	['deleterious(0.001)', 'deleterious(0.001)', 'deleterious(0.001)', 'deleterious(0.001)']	[]	['probably_damaging(1)', 'probably_damaging(1)', 'probably_damaging(1)', 'probably_damaging(1)']	[]	0.000235043	0.0159	1
Q12756	Q9UJV3	ECLAIR	KIF1A	MID2	547	11043	8	4	1	0	['p.R465W', 'p.R307P"', '"p.R307P', 'p.R307P', '"p.R307Q', 'p.R307Q"', 'p.R307Q', '"p.R307Q', 'p.R307Q"', 'p.R307Q']	[]	['deleterious(0.001)', 'deleterious(0.001)', 'deleterious(0.001)', 'deleterious(0.001)']	[]	['probably_damaging(1)', 'probably_damaging(1)', 'probably_damaging(1)', 'probably_damaging(1)']	[]	0.000235043	0.0159	1
Q12756	Q9UPT6	ECLAIR	KIF1A	MAPK8IP3	547	23162	8	4	1	0	['p.R465W', 'p.R307P"', '"p.R307P', 'p.R307P', '"p.R307Q', 'p.R307Q"', 'p.R307Q', '"p.R307Q', 'p.R307Q"', 'p.R307Q']	[]	['deleterious(0.001)', 'deleterious(0.001)', 'deleterious(0.001)', 'deleterious(0.001)']	[]	['probably_damaging(1)', 'probably_damaging(1)', 'probably_damaging(1)', 'probably_damaging(1)']	[]	0.000235043	0.0159	1
Q12756	V9HW29	ECLAIR	KIF1A	HEL-S-61	547	3799	8	4	0	0	['p.R465W', 'p.R307P"', '"p.R307P', 'p.R307P', '"p.R307Q', 'p.R307Q"', 'p.R307Q', '"p.R307Q', 'p.R307Q"', 'p.R307Q']	[]	['deleterious(0.001)', 'deleterious(0.001)', 'deleterious(0.001)', 'deleterious(0.001)']	[]	['probably_damaging(1)', 'probably_damaging(1)', 'probably_damaging(1)', 'probably_damaging(1)']	[]	0.000235043	0.0159	1
Q8IUQ4	Q9UHX1	ECLAIR	SIAH1	PUF60	6477	22827	2	0	3	3	[]	['p.G448E', 'p.E138K', 'p.D142N']	[]	['deleterious(0)', 'deleterious(0.03)', 'tolerated(0.917)']	[]	['probably_damaging(0.999)', 'probably_damaging(0.999)', 'benign(0.028)']	0.000267099	0.0135	1
Q01813	Q01813	PDB	PFKP	PFKP	5214	5214	2	2	2	2	['p.I651V', 'p.I473V', 'p.R667Q']	['p.I651V', 'p.I473V', 'p.R667Q']	['deleterious(0.016)', 'deleterious(0.488)']	['deleterious(0.016)', 'deleterious(0.488)']	['benign(0.009)', 'benign(0.001)']	['benign(0.009)', 'benign(0.001)']	0.000286508	0.0144	1
Q9UHR5	Q9UHX1	ECLAIR	SAP30BP	PUF60	29115	22827	0	0	3	3	[]	['p.G448E', 'p.E138K', 'p.D159N"']	[]	['deleterious(0)', 'deleterious(0.03)', 'tolerated(0.917)']	[]	['probably_damaging(0.999)', 'probably_damaging(0.999)', 'benign(0.028)']	0.000289981	0.0144	1
Q96BM9	Q9UHX1	ECLAIR	ARL8A	PUF60	127829	22827	0	0	3	3	[]	['p.G448E', 'p.E138K', 'p.D142N']	[]	['deleterious(0)', 'deleterious(0.03)', 'tolerated(0.917)']	[]	['probably_damaging(0.999)', 'probably_damaging(0.999)', 'benign(0.028)']	0.000314134	0.0155	1
P33778	Q92793	ECLAIR	HIST1H2BB	CREBBP	3018	1387	2	1	10	6	['p.S56L']	['"p.Y613C', 'p.Y651C"', '"p.H1791D', '"p.C1788W', '"p.N1551K', '"p.C1370W', '"p.H1791D']	['unknown(.)']	['deleterious(0)', 'deleterious(0.001)', 'deleterious(0)', 'deleterious(0.3)', 'deleterious(0)', 'deleterious(0.001)']	['benign(0.053)']	['probably_damaging(1)', 'probably_damaging(0.991)', 'probably_damaging(0.999)', 'probably_damaging(0.997)', 'probably_damaging(1)', 'probably_damaging(0.991)']	0.000331239	0.0162	1
Q13155	Q9UHX1	ECLAIR	AIMP2	PUF60	7965	22827	0	0	3	3	[]	['p.G448E', 'p.E138K', 'p.D142N']	[]	['deleterious(0)', 'deleterious(0.03)', 'tolerated(0.917)']	[]	['probably_damaging(0.999)', 'probably_damaging(0.999)', 'benign(0.028)']	0.000339593	0.0164	1
Q9UHX1	Q9Y3B4	ECLAIR	PUF60	SF3B6	22827	51639	3	3	0	0	['p.G448E', 'p.E138K', 'p.D142N']	[]	['deleterious(0)', 'deleterious(0.03)', 'tolerated(0.917)']	[]	['probably_damaging(0.999)', 'probably_damaging(0.999)', 'benign(0.028)']	[]	0.000339593	0.0164	1
P54727	Q9UHX1	ECLAIR	RAD23B	PUF60	5887	22827	1	1	3	3	['p.Q293E"']	['p.G448E', 'p.E164K', 'p.E163K', 'p.E138K', 'p.D159N"']	['deleterious(0.011)']	['deleterious(0)', 'deleterious(0.03)', 'tolerated(0.917)']	['probably_damaging(0.985)']	['probably_damaging(0.999)', 'probably_damaging(0.999)', 'benign(0.028)']	0.00033995	0.0162	1
P36894	Q15326	ECLAIR	BMPR1A	ZMYND11	657	10771	0	0	6	3	[]	['p.R583W"', 'p.R583W"', 'p.R583W"']	[]	['deleterious(0)', 'deleterious(0)', 'deleterious(0)']	[]	['probably_damaging(1)', 'probably_damaging(1)', 'probably_damaging(1)']	0.000353511	0.0167	1
O00571	P62266	ECLAIR	DDX3X	RPS23	1654	6228	15	5	0	0	['"p.R360C', 'p.R534H', 'p.R534H"', 'p.V535I', 'p.V535I"', '"p.R360C', 'p.R534H', 'p.R534H"']	[]	['deleterious(0)', 'deleterious(0)', 'deleterious(0.035)', 'deleterious(0)', 'deleterious(0)']	[]	['probably_damaging(1)', 'probably_damaging(1)', 'possibly_damaging(0.532)', 'probably_damaging(1)', 'probably_damaging(1)']	[]	0.000391349	0.0183	1
Q8NDV3	Q9UQE7	I3D	SMC1B	SMC3	27127	9126	1	0	4	3	[]	['p.G1188A', 'p.Q1147E', 'p.G1188A']	[]	['deleterious(0)', 'deleterious(0.058)', 'deleterious(0)']	[]	['probably_damaging(1)', 'probably_damaging(0.998)', 'probably_damaging(1)']	0.000396536	0.0184	1
Q15326	Q9Y4K3	ECLAIR	ZMYND11	TRAF6	10771	7189	6	3	0	0	['p.R583W"', 'p.R583W"', 'p.R583W"']	[]	['deleterious(0)', 'deleterious(0)', 'deleterious(0)']	[]	['probably_damaging(1)', 'probably_damaging(1)', 'probably_damaging(1)']	[]	0.000422413	0.0194	1
P41227	Q9Y2D8	ECLAIR	NAA10	SSX2IP	8260	117178	5	4	0	0	['p.R83C"', '"p.R83C', '"p.H114P', 'p.R83C"', '"p.R83C', '"p.R82Q', 'p.R82Q"']	[]	['deleterious(0.01)', 'deleterious(0.004)', 'deleterious(0.01)', 'deleterious(0)']	[]	['possibly_damaging(0.598)', 'possibly_damaging(0.936)', 'possibly_damaging(0.598)', 'probably_damaging(1)']	[]	0.000422864	0.0193	1
O43318	Q13114	ECLAIR	MAP3K7	TRAF3	6885	7187	2	1	1	1	['p.R238Q"', '"p.R238Q', 'p.R238Q']	['p.F450C', 'p.F450C"']	['tolerated(0.363)']	['tolerated(0.672)']	['benign(0.103)']	['benign(0.33)']	0.000485661	0.022	1
O00716	Q92793	ECLAIR	E2F3	CREBBP	1871	1387	0	0	10	6	[]	['"p.Y613C', 'p.Y651C"', '"p.H1791D', '"p.C1788W', '"p.N1551K', '"p.C1370W', '"p.H1791D']	[]	['deleterious(0)', 'deleterious(0.001)', 'deleterious(0)', 'deleterious(0.3)', 'deleterious(0)', 'deleterious(0.001)']	[]	['probably_damaging(1)', 'probably_damaging(0.991)', 'probably_damaging(0.999)', 'probably_damaging(0.997)', 'probably_damaging(1)', 'probably_damaging(0.991)']	0.000498602	0.0224	1
O14920	Q92793	ECLAIR	IKBKB	CREBBP	3551	1387	0	0	10	6	[]	['"p.Y613C', 'p.Y651C"', '"p.H1791D', '"p.C1788W', '"p.N1551K', '"p.C1370W', '"p.H1791D']	[]	['deleterious(0)', 'deleterious(0.001)', 'deleterious(0)', 'deleterious(0.3)', 'deleterious(0)', 'deleterious(0.001)']	[]	['probably_damaging(1)', 'probably_damaging(0.991)', 'probably_damaging(0.999)', 'probably_damaging(0.997)', 'probably_damaging(1)', 'probably_damaging(0.991)']	0.000498602	0.0224	1
O14976	Q92793	ECLAIR	GAK	CREBBP	2580	1387	0	0	10	6	[]	['"p.Y613C', 'p.Y651C"', '"p.H1791D', '"p.C1788W', '"p.N1551K', '"p.C1370W', '"p.H1791D']	[]	['deleterious(0)', 'deleterious(0.001)', 'deleterious(0)', 'deleterious(0.3)', 'deleterious(0)', 'deleterious(0.001)']	[]	['probably_damaging(1)', 'probably_damaging(0.991)', 'probably_damaging(0.999)', 'probably_damaging(0.997)', 'probably_damaging(1)', 'probably_damaging(0.991)']	0.000498602	0.0224	1
O43474	Q92793	ECLAIR	KLF4	CREBBP	9314	1387	0	0	10	6	[]	['"p.Y613C', 'p.Y651C"', '"p.H1791D', '"p.C1788W', '"p.N1551K', '"p.C1370W', '"p.H1791D']	[]	['deleterious(0)', 'deleterious(0.001)', 'deleterious(0)', 'deleterious(0.3)', 'deleterious(0)', 'deleterious(0.001)']	[]	['probably_damaging(1)', 'probably_damaging(0.991)', 'probably_damaging(0.999)', 'probably_damaging(0.997)', 'probably_damaging(1)', 'probably_damaging(0.991)']	0.000498602	0.0224	1
O43524	Q92793	ECLAIR	FOXO3	CREBBP	2309	1387	0	0	10	6	[]	['"p.Y613C', 'p.Y651C"', '"p.H1791D', '"p.C1788W', '"p.N1551K', '"p.C1370W', '"p.H1791D']	[]	['deleterious(0)', 'deleterious(0.001)', 'deleterious(0)', 'deleterious(0.3)', 'deleterious(0)', 'deleterious(0.001)']	[]	['probably_damaging(1)', 'probably_damaging(0.991)', 'probably_damaging(0.999)', 'probably_damaging(0.997)', 'probably_damaging(1)', 'probably_damaging(0.991)']	0.000498602	0.0224	1
O60381	Q92793	ECLAIR	HBP1	CREBBP	26959	1387	0	0	10	6	[]	['"p.Y613C', 'p.Y651C"', '"p.H1791D', '"p.C1788W', '"p.N1551K', '"p.C1370W', '"p.H1791D']	[]	['deleterious(0)', 'deleterious(0.001)', 'deleterious(0)', 'deleterious(0.3)', 'deleterious(0)', 'deleterious(0.001)']	[]	['probably_damaging(1)', 'probably_damaging(0.991)', 'probably_damaging(0.999)', 'probably_damaging(0.997)', 'probably_damaging(1)', 'probably_damaging(0.991)']	0.000498602	0.0224	1
O60684	Q92793	ECLAIR	KPNA6	CREBBP	23633	1387	0	0	10	6	[]	['"p.Y613C', 'p.Y651C"', '"p.H1791D', '"p.C1788W', '"p.N1551K', '"p.C1370W', '"p.H1791D']	[]	['deleterious(0)', 'deleterious(0.001)', 'deleterious(0)', 'deleterious(0.3)', 'deleterious(0)', 'deleterious(0.001)']	[]	['probably_damaging(1)', 'probably_damaging(0.991)', 'probably_damaging(0.999)', 'probably_damaging(0.997)', 'probably_damaging(1)', 'probably_damaging(0.991)']	0.000498602	0.0224	1
O75175	Q92793	ECLAIR	CNOT3	CREBBP	4849	1387	5	0	10	6	[]	['"p.Y613C', 'p.Y651C"', '"p.H1791D', '"p.C1788W', '"p.N1551K', '"p.C1370W', '"p.H1791D']	[]	['deleterious(0)', 'deleterious(0.001)', 'deleterious(0)', 'deleterious(0.3)', 'deleterious(0)', 'deleterious(0.001)']	[]	['probably_damaging(1)', 'probably_damaging(0.991)', 'probably_damaging(0.999)', 'probably_damaging(0.997)', 'probably_damaging(1)', 'probably_damaging(0.991)']	0.000498602	0.0224	1
O75376	Q92793	ECLAIR	NCOR1	CREBBP	9611	1387	2	0	10	6	[]	['"p.Y613C', 'p.Y651C"', '"p.H1791D', '"p.C1788W', '"p.N1551K', '"p.C1370W', '"p.H1791D']	[]	['deleterious(0)', 'deleterious(0.001)', 'deleterious(0)', 'deleterious(0.3)', 'deleterious(0)', 'deleterious(0.001)']	[]	['probably_damaging(1)', 'probably_damaging(0.991)', 'probably_damaging(0.999)', 'probably_damaging(0.997)', 'probably_damaging(1)', 'probably_damaging(0.991)']	0.000498602	0.0224	1
O75925	Q92793	ECLAIR	PIAS1	CREBBP	8554	1387	0	0	10	6	[]	['"p.Y613C', 'p.Y651C"', '"p.H1791D', '"p.C1788W', '"p.N1551K', '"p.C1370W', '"p.H1791D']	[]	['deleterious(0)', 'deleterious(0.001)', 'deleterious(0)', 'deleterious(0.3)', 'deleterious(0)', 'deleterious(0.001)']	[]	['probably_damaging(1)', 'probably_damaging(0.991)', 'probably_damaging(0.999)', 'probably_damaging(0.997)', 'probably_damaging(1)', 'probably_damaging(0.991)']	0.000498602	0.0224	1
O95359	Q92793	ECLAIR	TACC2	CREBBP	10579	1387	1	0	10	6	[]	['"p.Y613C', 'p.Y651C"', '"p.H1791D', '"p.C1788W', '"p.N1551K', '"p.C1370W', '"p.H1791D']	[]	['deleterious(0)', 'deleterious(0.001)', 'deleterious(0)', 'deleterious(0.3)', 'deleterious(0)', 'deleterious(0.001)']	[]	['probably_damaging(1)', 'probably_damaging(0.991)', 'probably_damaging(0.999)', 'probably_damaging(0.997)', 'probably_damaging(1)', 'probably_damaging(0.991)']	0.000498602	0.0224	1
P01100	Q92793	ECLAIR	FOS	CREBBP	2353	1387	0	0	10	6	[]	['"p.Y613C', 'p.Y651C"', '"p.H1791D', '"p.C1788W', '"p.N1551K', '"p.C1370W', '"p.H1791D']	[]	['deleterious(0)', 'deleterious(0.001)', 'deleterious(0)', 'deleterious(0.3)', 'deleterious(0)', 'deleterious(0.001)']	[]	['probably_damaging(1)', 'probably_damaging(0.991)', 'probably_damaging(0.999)', 'probably_damaging(0.997)', 'probably_damaging(1)', 'probably_damaging(0.991)']	0.000498602	0.0224	1
P01106	Q92793	ECLAIR	MYC	CREBBP	4609	1387	0	0	10	6	[]	['"p.Y613C', 'p.Y651C"', '"p.H1791D', '"p.C1788W', '"p.N1551K', '"p.C1370W', '"p.H1791D']	[]	['deleterious(0)', 'deleterious(0.001)', 'deleterious(0)', 'deleterious(0.3)', 'deleterious(0)', 'deleterious(0.001)']	[]	['probably_damaging(1)', 'probably_damaging(0.991)', 'probably_damaging(0.999)', 'probably_damaging(0.997)', 'probably_damaging(1)', 'probably_damaging(0.991)']	0.000498602	0.0224	1
P01130	Q92793	ECLAIR	LDLR	CREBBP	3949	1387	0	0	10	6	[]	['"p.Y613C', 'p.Y651C"', '"p.H1791D', '"p.C1788W', '"p.N1551K', '"p.C1370W', '"p.H1791D']	[]	['deleterious(0)', 'deleterious(0.001)', 'deleterious(0)', 'deleterious(0.3)', 'deleterious(0)', 'deleterious(0.001)']	[]	['probably_damaging(1)', 'probably_damaging(0.991)', 'probably_damaging(0.999)', 'probably_damaging(0.997)', 'probably_damaging(1)', 'probably_damaging(0.991)']	0.000498602	0.0224	1
P09429	Q92793	ECLAIR	HMGB1	CREBBP	3146	1387	0	0	10	6	[]	['"p.Y613C', 'p.Y651C"', '"p.H1791D', '"p.C1788W', '"p.N1551K', '"p.C1370W', '"p.H1791D']	[]	['deleterious(0)', 'deleterious(0.001)', 'deleterious(0)', 'deleterious(0.3)', 'deleterious(0)', 'deleterious(0.001)']	[]	['probably_damaging(1)', 'probably_damaging(0.991)', 'probably_damaging(0.999)', 'probably_damaging(0.997)', 'probably_damaging(1)', 'probably_damaging(0.991)']	0.000498602	0.0224	1
P09629	Q92793	ECLAIR	HOXB7	CREBBP	3217	1387	1	0	10	6	[]	['"p.Y613C', 'p.Y651C"', '"p.H1791D', '"p.C1788W', '"p.N1551K', '"p.C1370W', '"p.H1791D']	[]	['deleterious(0)', 'deleterious(0.001)', 'deleterious(0)', 'deleterious(0.3)', 'deleterious(0)', 'deleterious(0.001)']	[]	['probably_damaging(1)', 'probably_damaging(0.991)', 'probably_damaging(0.999)', 'probably_damaging(0.997)', 'probably_damaging(1)', 'probably_damaging(0.991)']	0.000498602	0.0224	1
P09874	Q92793	ECLAIR	PARP1	CREBBP	142	1387	0	0	10	6	[]	['"p.Y613C', 'p.Y651C"', '"p.H1791D', '"p.C1788W', '"p.N1551K', '"p.C1370W', '"p.H1791D']	[]	['deleterious(0)', 'deleterious(0.001)', 'deleterious(0)', 'deleterious(0.3)', 'deleterious(0)', 'deleterious(0.001)']	[]	['probably_damaging(1)', 'probably_damaging(0.991)', 'probably_damaging(0.999)', 'probably_damaging(0.997)', 'probably_damaging(1)', 'probably_damaging(0.991)']	0.000498602	0.0224	1
P10243	Q92793	ECLAIR	MYBL1	CREBBP	4603	1387	0	0	10	6	[]	['"p.Y613C', 'p.Y651C"', '"p.H1791D', '"p.C1788W', '"p.N1551K', '"p.C1370W', '"p.H1791D']	[]	['deleterious(0)', 'deleterious(0.001)', 'deleterious(0)', 'deleterious(0.3)', 'deleterious(0)', 'deleterious(0.001)']	[]	['probably_damaging(1)', 'probably_damaging(0.991)', 'probably_damaging(0.999)', 'probably_damaging(0.997)', 'probably_damaging(1)', 'probably_damaging(0.991)']	0.000498602	0.0224	1
P11831	Q92793	ECLAIR	SRF	CREBBP	6722	1387	0	0	10	6	[]	['"p.Y613C', 'p.Y651C"', '"p.H1791D', '"p.C1788W', '"p.N1551K', '"p.C1370W', '"p.H1791D']	[]	['deleterious(0)', 'deleterious(0.001)', 'deleterious(0)', 'deleterious(0.3)', 'deleterious(0)', 'deleterious(0.001)']	[]	['probably_damaging(1)', 'probably_damaging(0.991)', 'probably_damaging(0.999)', 'probably_damaging(0.997)', 'probably_damaging(1)', 'probably_damaging(0.991)']	0.000498602	0.0224	1
P12004	Q92793	ECLAIR	PCNA	CREBBP	5111	1387	0	0	10	6	[]	['"p.Y613C', 'p.Y651C"', '"p.H1791D', '"p.C1788W', '"p.N1551K', '"p.C1370W', '"p.H1791D']	[]	['deleterious(0)', 'deleterious(0.001)', 'deleterious(0)', 'deleterious(0.3)', 'deleterious(0)', 'deleterious(0.001)']	[]	['probably_damaging(1)', 'probably_damaging(0.991)', 'probably_damaging(0.999)', 'probably_damaging(0.997)', 'probably_damaging(1)', 'probably_damaging(0.991)']	0.000498602	0.0224	1
P15336	Q92793	ECLAIR	ATF2	CREBBP	1386	1387	0	0	10	6	[]	['"p.Y613C', 'p.Y651C"', '"p.H1791D', '"p.C1788W', '"p.N1551K', '"p.C1370W', '"p.H1791D']	[]	['deleterious(0)', 'deleterious(0.001)', 'deleterious(0)', 'deleterious(0.3)', 'deleterious(0)', 'deleterious(0.001)']	[]	['probably_damaging(1)', 'probably_damaging(0.991)', 'probably_damaging(0.999)', 'probably_damaging(0.997)', 'probably_damaging(1)', 'probably_damaging(0.991)']	0.000498602	0.0224	1
P16471	Q92793	ECLAIR	PRLR	CREBBP	5618	1387	0	0	10	6	[]	['"p.Y613C', 'p.Y651C"', '"p.H1791D', '"p.C1788W', '"p.N1551K', '"p.C1370W', '"p.H1791D']	[]	['deleterious(0)', 'deleterious(0.001)', 'deleterious(0)', 'deleterious(0.3)', 'deleterious(0)', 'deleterious(0.001)']	[]	['probably_damaging(1)', 'probably_damaging(0.991)', 'probably_damaging(0.999)', 'probably_damaging(0.997)', 'probably_damaging(1)', 'probably_damaging(0.991)']	0.000498602	0.0224	1
P18146	Q92793	ECLAIR	EGR1	CREBBP	1958	1387	0	0	10	6	[]	['"p.Y613C', 'p.Y651C"', '"p.H1791D', '"p.C1788W', '"p.N1551K', '"p.C1370W', '"p.H1791D']	[]	['deleterious(0)', 'deleterious(0.001)', 'deleterious(0)', 'deleterious(0.3)', 'deleterious(0)', 'deleterious(0.001)']	[]	['probably_damaging(1)', 'probably_damaging(0.991)', 'probably_damaging(0.999)', 'probably_damaging(0.997)', 'probably_damaging(1)', 'probably_damaging(0.991)']	0.000498602	0.0224	1
P19784	Q92793	ECLAIR	CSNK2A2	CREBBP	1459	1387	0	0	10	6	[]	['"p.Y613C', 'p.Y651C"', '"p.H1791D', '"p.C1788W', '"p.N1551K', '"p.C1370W', '"p.H1791D']	[]	['deleterious(0)', 'deleterious(0.001)', 'deleterious(0)', 'deleterious(0.3)', 'deleterious(0)', 'deleterious(0.001)']	[]	['probably_damaging(1)', 'probably_damaging(0.991)', 'probably_damaging(0.999)', 'probably_damaging(0.997)', 'probably_damaging(1)', 'probably_damaging(0.991)']	0.000498602	0.0224	1
P24863	Q92793	ECLAIR	CCNC	CREBBP	892	1387	0	0	10	6	[]	['"p.Y613C', 'p.Y651C"', '"p.H1791D', '"p.C1788W', '"p.N1551K', '"p.C1370W', '"p.H1791D']	[]	['deleterious(0)', 'deleterious(0.001)', 'deleterious(0)', 'deleterious(0.3)', 'deleterious(0)', 'deleterious(0.001)']	[]	['probably_damaging(1)', 'probably_damaging(0.991)', 'probably_damaging(0.999)', 'probably_damaging(0.997)', 'probably_damaging(1)', 'probably_damaging(0.991)']	0.000498602	0.0224	1
P24928	Q92793	ECLAIR	POLR2A	CREBBP	5430	1387	1	0	10	6	[]	['"p.Y613C', 'p.Y651C"', '"p.H1791D', '"p.C1788W', '"p.N1551K', '"p.C1370W', '"p.H1791D']	[]	['deleterious(0)', 'deleterious(0.001)', 'deleterious(0)', 'deleterious(0.3)', 'deleterious(0)', 'deleterious(0.001)']	[]	['probably_damaging(1)', 'probably_damaging(0.991)', 'probably_damaging(0.999)', 'probably_damaging(0.997)', 'probably_damaging(1)', 'probably_damaging(0.991)']	0.000498602	0.0224	1
P26583	Q92793	ECLAIR	HMGB2	CREBBP	3148	1387	0	0	10	6	[]	['"p.Y613C', 'p.Y651C"', '"p.H1791D', '"p.C1788W', '"p.N1551K', '"p.C1370W', '"p.H1791D']	[]	['deleterious(0)', 'deleterious(0.001)', 'deleterious(0)', 'deleterious(0.3)', 'deleterious(0)', 'deleterious(0.001)']	[]	['probably_damaging(1)', 'probably_damaging(0.991)', 'probably_damaging(0.999)', 'probably_damaging(0.997)', 'probably_damaging(1)', 'probably_damaging(0.991)']	0.000498602	0.0224	1
P27361	Q92793	ECLAIR	MAPK3	CREBBP	5595	1387	0	0	10	6	[]	['"p.Y613C', 'p.Y651C"', '"p.H1791D', '"p.C1788W', '"p.N1551K', '"p.C1370W', '"p.H1791D']	[]	['deleterious(0)', 'deleterious(0.001)', 'deleterious(0)', 'deleterious(0.3)', 'deleterious(0)', 'deleterious(0.001)']	[]	['probably_damaging(1)', 'probably_damaging(0.991)', 'probably_damaging(0.999)', 'probably_damaging(0.997)', 'probably_damaging(1)', 'probably_damaging(0.991)']	0.000498602	0.0224	1
P28482	Q92793	ECLAIR	MAPK1	CREBBP	5594	1387	0	0	10	6	[]	['"p.Y613C', 'p.Y651C"', '"p.H1791D', '"p.C1788W', '"p.N1551K', '"p.C1370W', '"p.H1791D']	[]	['deleterious(0)', 'deleterious(0.001)', 'deleterious(0)', 'deleterious(0.3)', 'deleterious(0)', 'deleterious(0.001)']	[]	['probably_damaging(1)', 'probably_damaging(0.991)', 'probably_damaging(0.999)', 'probably_damaging(0.997)', 'probably_damaging(1)', 'probably_damaging(0.991)']	0.000498602	0.0224	1
P31749	Q92793	ECLAIR	AKT1	CREBBP	207	1387	0	0	10	6	[]	['"p.Y613C', 'p.Y651C"', '"p.H1791D', '"p.C1788W', '"p.N1551K', '"p.C1370W', '"p.H1791D']	[]	['deleterious(0)', 'deleterious(0.001)', 'deleterious(0)', 'deleterious(0.3)', 'deleterious(0)', 'deleterious(0.001)']	[]	['probably_damaging(1)', 'probably_damaging(0.991)', 'probably_damaging(0.999)', 'probably_damaging(0.997)', 'probably_damaging(1)', 'probably_damaging(0.991)']	0.000498602	0.0224	1
P35659	Q92793	ECLAIR	DEK	CREBBP	7913	1387	0	0	10	6	[]	['"p.Y613C', 'p.Y651C"', '"p.H1791D', '"p.C1788W', '"p.N1551K', '"p.C1370W', '"p.H1791D']	[]	['deleterious(0)', 'deleterious(0.001)', 'deleterious(0)', 'deleterious(0.3)', 'deleterious(0)', 'deleterious(0.001)']	[]	['probably_damaging(1)', 'probably_damaging(0.991)', 'probably_damaging(0.999)', 'probably_damaging(0.997)', 'probably_damaging(1)', 'probably_damaging(0.991)']	0.000498602	0.0224	1
P38936	Q92793	ECLAIR	CDKN1A	CREBBP	1026	1387	0	0	10	6	[]	['"p.Y613C', 'p.Y651C"', '"p.H1791D', '"p.C1788W', '"p.N1551K', '"p.C1370W', '"p.H1791D']	[]	['deleterious(0)', 'deleterious(0.001)', 'deleterious(0)', 'deleterious(0.3)', 'deleterious(0)', 'deleterious(0.001)']	[]	['probably_damaging(1)', 'probably_damaging(0.991)', 'probably_damaging(0.999)', 'probably_damaging(0.997)', 'probably_damaging(1)', 'probably_damaging(0.991)']	0.000498602	0.0224	1
P41182	Q92793	ECLAIR	BCL6	CREBBP	604	1387	1	0	10	6	[]	['"p.Y613C', 'p.Y651C"', '"p.H1791D', '"p.C1788W', '"p.N1551K', '"p.C1370W', '"p.H1791D']	[]	['deleterious(0)', 'deleterious(0.001)', 'deleterious(0)', 'deleterious(0.3)', 'deleterious(0)', 'deleterious(0.001)']	[]	['probably_damaging(1)', 'probably_damaging(0.991)', 'probably_damaging(0.999)', 'probably_damaging(0.997)', 'probably_damaging(1)', 'probably_damaging(0.991)']	0.000498602	0.0224	1
P48443	Q92793	ECLAIR	RXRG	CREBBP	6258	1387	0	0	10	6	[]	['"p.Y613C', 'p.Y651C"', '"p.H1791D', '"p.C1788W', '"p.N1551K', '"p.C1370W', '"p.H1791D']	[]	['deleterious(0)', 'deleterious(0.001)', 'deleterious(0)', 'deleterious(0.3)', 'deleterious(0)', 'deleterious(0.001)']	[]	['probably_damaging(1)', 'probably_damaging(0.991)', 'probably_damaging(0.999)', 'probably_damaging(0.997)', 'probably_damaging(1)', 'probably_damaging(0.991)']	0.000498602	0.0224	1
P49336	Q92793	ECLAIR	CDK8	CREBBP	1024	1387	1	0	10	6	[]	['"p.Y613C', 'p.Y651C"', '"p.H1791D', '"p.C1788W', '"p.N1551K', '"p.C1370W', '"p.H1791D']	[]	['deleterious(0)', 'deleterious(0.001)', 'deleterious(0)', 'deleterious(0.3)', 'deleterious(0)', 'deleterious(0.001)']	[]	['probably_damaging(1)', 'probably_damaging(0.991)', 'probably_damaging(0.999)', 'probably_damaging(0.997)', 'probably_damaging(1)', 'probably_damaging(0.991)']	0.000498602	0.0224	1
P49917	Q92793	ECLAIR	LIG4	CREBBP	3981	1387	0	0	10	6	[]	['"p.Y613C', 'p.Y651C"', '"p.H1791D', '"p.C1788W', '"p.N1551K', '"p.C1370W', '"p.H1791D']	[]	['deleterious(0)', 'deleterious(0.001)', 'deleterious(0)', 'deleterious(0.3)', 'deleterious(0)', 'deleterious(0.001)']	[]	['probably_damaging(1)', 'probably_damaging(0.991)', 'probably_damaging(0.999)', 'probably_damaging(0.997)', 'probably_damaging(1)', 'probably_damaging(0.991)']	0.000498602	0.0224	1
P51449	Q92793	ECLAIR	RORC	CREBBP	6097	1387	1	0	10	6	[]	['"p.Y613C', 'p.Y651C"', '"p.H1791D', '"p.C1788W', '"p.N1551K', '"p.C1370W', '"p.H1791D']	[]	['deleterious(0)', 'deleterious(0.001)', 'deleterious(0)', 'deleterious(0.3)', 'deleterious(0)', 'deleterious(0.001)']	[]	['probably_damaging(1)', 'probably_damaging(0.991)', 'probably_damaging(0.999)', 'probably_damaging(0.997)', 'probably_damaging(1)', 'probably_damaging(0.991)']	0.000498602	0.0224	1
P52292	Q92793	ECLAIR	KPNA2	CREBBP	3838	1387	0	0	10	6	[]	['"p.Y613C', 'p.Y651C"', '"p.H1791D', '"p.C1788W', '"p.N1551K', '"p.C1370W', '"p.H1791D']	[]	['deleterious(0)', 'deleterious(0.001)', 'deleterious(0)', 'deleterious(0.3)', 'deleterious(0)', 'deleterious(0.001)']	[]	['probably_damaging(1)', 'probably_damaging(0.991)', 'probably_damaging(0.999)', 'probably_damaging(0.997)', 'probably_damaging(1)', 'probably_damaging(0.991)']	0.000498602	0.0224	1
P54725	Q92793	ECLAIR	RAD23A	CREBBP	5886	1387	0	0	10	6	[]	['"p.Y613C', 'p.Y651C"', '"p.H1791D', '"p.C1788W', '"p.N1551K', '"p.C1370W', '"p.H1791D']	[]	['deleterious(0)', 'deleterious(0.001)', 'deleterious(0)', 'deleterious(0.3)', 'deleterious(0)', 'deleterious(0.001)']	[]	['probably_damaging(1)', 'probably_damaging(0.991)', 'probably_damaging(0.999)', 'probably_damaging(0.997)', 'probably_damaging(1)', 'probably_damaging(0.991)']	0.000498602	0.0224	1
P55209	Q92793	ECLAIR	NAP1L1	CREBBP	4673	1387	0	0	10	6	[]	['"p.Y613C', 'p.Y651C"', '"p.H1791D', '"p.C1788W', '"p.N1551K', '"p.C1370W', '"p.H1791D']	[]	['deleterious(0)', 'deleterious(0.001)', 'deleterious(0)', 'deleterious(0.3)', 'deleterious(0)', 'deleterious(0.001)']	[]	['probably_damaging(1)', 'probably_damaging(0.991)', 'probably_damaging(0.999)', 'probably_damaging(0.997)', 'probably_damaging(1)', 'probably_damaging(0.991)']	0.000498602	0.0224	1
P63165	Q92793	ECLAIR	SUMO1	CREBBP	7341	1387	0	0	10	6	[]	['"p.Y613C', 'p.Y651C"', '"p.H1791D', '"p.C1788W', '"p.N1551K', '"p.C1370W', '"p.H1791D']	[]	['deleterious(0)', 'deleterious(0.001)', 'deleterious(0)', 'deleterious(0.3)', 'deleterious(0)', 'deleterious(0.001)']	[]	['probably_damaging(1)', 'probably_damaging(0.991)', 'probably_damaging(0.999)', 'probably_damaging(0.997)', 'probably_damaging(1)', 'probably_damaging(0.991)']	0.000498602	0.0224	1
P63279	Q92793	ECLAIR	UBE2I	CREBBP	7329	1387	0	0	10	6	[]	['"p.Y613C', 'p.Y651C"', '"p.H1791D', '"p.C1788W', '"p.N1551K', '"p.C1370W', '"p.H1791D']	[]	['deleterious(0)', 'deleterious(0.001)', 'deleterious(0)', 'deleterious(0.3)', 'deleterious(0)', 'deleterious(0.001)']	[]	['probably_damaging(1)', 'probably_damaging(0.991)', 'probably_damaging(0.999)', 'probably_damaging(0.997)', 'probably_damaging(1)', 'probably_damaging(0.991)']	0.000498602	0.0224	1
P84243	Q92793	ECLAIR	H3F3A	CREBBP	3021	1387	1	0	10	6	[]	['"p.Y613C', 'p.Y651C"', '"p.H1791D', '"p.C1788W', '"p.N1551K', '"p.C1370W', '"p.H1791D']	[]	['deleterious(0)', 'deleterious(0.001)', 'deleterious(0)', 'deleterious(0.3)', 'deleterious(0)', 'deleterious(0.001)']	[]	['probably_damaging(1)', 'probably_damaging(0.991)', 'probably_damaging(0.999)', 'probably_damaging(0.997)', 'probably_damaging(1)', 'probably_damaging(0.991)']	0.000498602	0.0224	1
Q01094	Q92793	ECLAIR	E2F1	CREBBP	1869	1387	0	0	10	6	[]	['"p.Y613C', 'p.Y651C"', '"p.H1791D', '"p.C1788W', '"p.N1551K', '"p.C1370W', '"p.H1791D']	[]	['deleterious(0)', 'deleterious(0.001)', 'deleterious(0)', 'deleterious(0.3)', 'deleterious(0)', 'deleterious(0.001)']	[]	['probably_damaging(1)', 'probably_damaging(0.991)', 'probably_damaging(0.999)', 'probably_damaging(0.997)', 'probably_damaging(1)', 'probably_damaging(0.991)']	0.000498602	0.0224	1
Q02548	Q92793	ECLAIR	PAX5	CREBBP	5079	1387	0	0	10	6	[]	['"p.Y613C', 'p.Y651C"', '"p.H1791D', '"p.C1788W', '"p.N1551K', '"p.C1370W', '"p.H1791D']	[]	['deleterious(0)', 'deleterious(0.001)', 'deleterious(0)', 'deleterious(0.3)', 'deleterious(0)', 'deleterious(0.001)']	[]	['probably_damaging(1)', 'probably_damaging(0.991)', 'probably_damaging(0.999)', 'probably_damaging(0.997)', 'probably_damaging(1)', 'probably_damaging(0.991)']	0.000498602	0.0224	1
Q03112	Q92793	ECLAIR	MECOM	CREBBP	2122	1387	1	0	10	6	[]	['"p.Y613C', 'p.Y651C"', '"p.H1791D', '"p.C1788W', '"p.N1551K', '"p.C1370W', '"p.H1791D']	[]	['deleterious(0)', 'deleterious(0.001)', 'deleterious(0)', 'deleterious(0.3)', 'deleterious(0)', 'deleterious(0.001)']	[]	['probably_damaging(1)', 'probably_damaging(0.991)', 'probably_damaging(0.999)', 'probably_damaging(0.997)', 'probably_damaging(1)', 'probably_damaging(0.991)']	0.000498602	0.0224	1
Q04726	Q92793	ECLAIR	TLE3	CREBBP	7090	1387	0	0	10	6	[]	['"p.Y613C', 'p.Y651C"', '"p.H1791D', '"p.C1788W', '"p.N1551K', '"p.C1370W', '"p.H1791D']	[]	['deleterious(0)', 'deleterious(0.001)', 'deleterious(0)', 'deleterious(0.3)', 'deleterious(0)', 'deleterious(0.001)']	[]	['probably_damaging(1)', 'probably_damaging(0.991)', 'probably_damaging(0.999)', 'probably_damaging(0.997)', 'probably_damaging(1)', 'probably_damaging(0.991)']	0.000498602	0.0224	1
Q09028	Q92793	ECLAIR	RBBP4	CREBBP	5928	1387	1	0	10	6	[]	['"p.Y613C', 'p.Y651C"', '"p.H1791D', '"p.C1788W', '"p.N1551K', '"p.C1370W', '"p.H1791D']	[]	['deleterious(0)', 'deleterious(0.001)', 'deleterious(0)', 'deleterious(0.3)', 'deleterious(0)', 'deleterious(0.001)']	[]	['probably_damaging(1)', 'probably_damaging(0.991)', 'probably_damaging(0.999)', 'probably_damaging(0.997)', 'probably_damaging(1)', 'probably_damaging(0.991)']	0.000498602	0.0224	1
Q10567	Q92793	ECLAIR	AP1B1	CREBBP	162	1387	0	0	10	6	[]	['"p.Y613C', 'p.Y651C"', '"p.H1791D', '"p.C1788W', '"p.N1551K', '"p.C1370W', '"p.H1791D']	[]	['deleterious(0)', 'deleterious(0.001)', 'deleterious(0)', 'deleterious(0.3)', 'deleterious(0)', 'deleterious(0.001)']	[]	['probably_damaging(1)', 'probably_damaging(0.991)', 'probably_damaging(0.999)', 'probably_damaging(0.997)', 'probably_damaging(1)', 'probably_damaging(0.991)']	0.000498602	0.0224	1
Q12772	Q92793	ECLAIR	SREBF2	CREBBP	6721	1387	0	0	10	6	[]	['"p.Y613C', 'p.Y651C"', '"p.H1791D', '"p.C1788W', '"p.N1551K', '"p.C1370W', '"p.H1791D']	[]	['deleterious(0)', 'deleterious(0.001)', 'deleterious(0)', 'deleterious(0.3)', 'deleterious(0)', 'deleterious(0.001)']	[]	['probably_damaging(1)', 'probably_damaging(0.991)', 'probably_damaging(0.999)', 'probably_damaging(0.997)', 'probably_damaging(1)', 'probably_damaging(0.991)']	0.000498602	0.0224	1
Q13105	Q92793	ECLAIR	ZBTB17	CREBBP	7709	1387	0	0	10	6	[]	['"p.Y613C', 'p.Y651C"', '"p.H1791D', '"p.C1788W', '"p.N1551K', '"p.C1370W', '"p.H1791D']	[]	['deleterious(0)', 'deleterious(0.001)', 'deleterious(0)', 'deleterious(0.3)', 'deleterious(0)', 'deleterious(0.001)']	[]	['probably_damaging(1)', 'probably_damaging(0.991)', 'probably_damaging(0.999)', 'probably_damaging(0.997)', 'probably_damaging(1)', 'probably_damaging(0.991)']	0.000498602	0.0224	1
Q13568	Q92793	ECLAIR	IRF5	CREBBP	3663	1387	0	0	10	6	[]	['"p.Y613C', 'p.Y651C"', '"p.H1791D', '"p.C1788W', '"p.N1551K', '"p.C1370W', '"p.H1791D']	[]	['deleterious(0)', 'deleterious(0.001)', 'deleterious(0)', 'deleterious(0.3)', 'deleterious(0)', 'deleterious(0.001)']	[]	['probably_damaging(1)', 'probably_damaging(0.991)', 'probably_damaging(0.999)', 'probably_damaging(0.997)', 'probably_damaging(1)', 'probably_damaging(0.991)']	0.000498602	0.0224	1
Q13569	Q92793	ECLAIR	TDG	CREBBP	6996	1387	0	0	10	6	[]	['"p.Y613C', 'p.Y651C"', '"p.H1791D', '"p.C1788W', '"p.N1551K', '"p.C1370W', '"p.H1791D']	[]	['deleterious(0)', 'deleterious(0.001)', 'deleterious(0)', 'deleterious(0.3)', 'deleterious(0)', 'deleterious(0.001)']	[]	['probably_damaging(1)', 'probably_damaging(0.991)', 'probably_damaging(0.999)', 'probably_damaging(0.997)', 'probably_damaging(1)', 'probably_damaging(0.991)']	0.000498602	0.0224	1
Q13572	Q92793	ECLAIR	ITPK1	CREBBP	3705	1387	0	0	10	6	[]	['"p.Y613C', 'p.Y651C"', '"p.H1791D', '"p.C1788W', '"p.N1551K', '"p.C1370W', '"p.H1791D']	[]	['deleterious(0)', 'deleterious(0.001)', 'deleterious(0)', 'deleterious(0.3)', 'deleterious(0)', 'deleterious(0.001)']	[]	['probably_damaging(1)', 'probably_damaging(0.991)', 'probably_damaging(0.999)', 'probably_damaging(0.997)', 'probably_damaging(1)', 'probably_damaging(0.991)']	0.000498602	0.0224	1
Q14232	Q92793	ECLAIR	EIF2B1	CREBBP	1967	1387	0	0	10	6	[]	['"p.Y613C', 'p.Y651C"', '"p.H1791D', '"p.C1788W', '"p.N1551K', '"p.C1370W', '"p.H1791D']	[]	['deleterious(0)', 'deleterious(0.001)', 'deleterious(0)', 'deleterious(0.3)', 'deleterious(0)', 'deleterious(0.001)']	[]	['probably_damaging(1)', 'probably_damaging(0.991)', 'probably_damaging(0.999)', 'probably_damaging(0.997)', 'probably_damaging(1)', 'probably_damaging(0.991)']	0.000498602	0.0224	1
Q15596	Q92793	ECLAIR	NCOA2	CREBBP	10499	1387	0	0	10	6	[]	['"p.Y613C', 'p.Y651C"', '"p.H1791D', '"p.C1788W', '"p.N1551K', '"p.C1370W', '"p.H1791D']	[]	['deleterious(0)', 'deleterious(0.001)', 'deleterious(0)', 'deleterious(0.3)', 'deleterious(0)', 'deleterious(0.001)']	[]	['probably_damaging(1)', 'probably_damaging(0.991)', 'probably_damaging(0.999)', 'probably_damaging(0.997)', 'probably_damaging(1)', 'probably_damaging(0.991)']	0.000498602	0.0224	1
Q15642	Q92793	ECLAIR	TRIP10	CREBBP	9322	1387	1	0	10	6	[]	['"p.Y613C', 'p.Y651C"', '"p.H1791D', '"p.C1788W', '"p.N1551K', '"p.C1370W', '"p.H1791D']	[]	['deleterious(0)', 'deleterious(0.001)', 'deleterious(0)', 'deleterious(0.3)', 'deleterious(0)', 'deleterious(0.001)']	[]	['probably_damaging(1)', 'probably_damaging(0.991)', 'probably_damaging(0.999)', 'probably_damaging(0.997)', 'probably_damaging(1)', 'probably_damaging(0.991)']	0.000498602	0.0224	1
Q15650	Q92793	ECLAIR	TRIP4	CREBBP	9325	1387	0	0	10	6	[]	['"p.Y613C', 'p.Y651C"', '"p.H1791D', '"p.C1788W', '"p.N1551K', '"p.C1370W', '"p.H1791D']	[]	['deleterious(0)', 'deleterious(0.001)', 'deleterious(0)', 'deleterious(0.3)', 'deleterious(0)', 'deleterious(0.001)']	[]	['probably_damaging(1)', 'probably_damaging(0.991)', 'probably_damaging(0.999)', 'probably_damaging(0.997)', 'probably_damaging(1)', 'probably_damaging(0.991)']	0.000498602	0.0224	1
Q15699	Q92793	ECLAIR	ALX1	CREBBP	8092	1387	0	0	10	6	[]	['"p.Y613C', 'p.Y651C"', '"p.H1791D', '"p.C1788W', '"p.N1551K', '"p.C1370W', '"p.H1791D']	[]	['deleterious(0)', 'deleterious(0.001)', 'deleterious(0)', 'deleterious(0.3)', 'deleterious(0)', 'deleterious(0.001)']	[]	['probably_damaging(1)', 'probably_damaging(0.991)', 'probably_damaging(0.999)', 'probably_damaging(0.997)', 'probably_damaging(1)', 'probably_damaging(0.991)']	0.000498602	0.0224	1
Q16621	Q92793	ECLAIR	NFE2	CREBBP	4778	1387	0	0	10	6	[]	['"p.Y613C', 'p.Y651C"', '"p.H1791D', '"p.C1788W', '"p.N1551K', '"p.C1370W', '"p.H1791D']	[]	['deleterious(0)', 'deleterious(0.001)', 'deleterious(0)', 'deleterious(0.3)', 'deleterious(0)', 'deleterious(0.001)']	[]	['probably_damaging(1)', 'probably_damaging(0.991)', 'probably_damaging(0.999)', 'probably_damaging(0.997)', 'probably_damaging(1)', 'probably_damaging(0.991)']	0.000498602	0.0224	1
Q16695	Q92793	ECLAIR	H3-4	CREBBP	8290	1387	0	0	10	6	[]	['"p.Y613C', 'p.Y651C"', '"p.H1791D', '"p.C1788W', '"p.N1551K', '"p.C1370W', '"p.H1791D']	[]	['deleterious(0)', 'deleterious(0.001)', 'deleterious(0)', 'deleterious(0.3)', 'deleterious(0)', 'deleterious(0.001)']	[]	['probably_damaging(1)', 'probably_damaging(0.991)', 'probably_damaging(0.999)', 'probably_damaging(0.997)', 'probably_damaging(1)', 'probably_damaging(0.991)']	0.000498602	0.0224	1
Q16763	Q92793	ECLAIR	UBE2S	CREBBP	27338	1387	1	0	10	6	[]	['"p.Y613C', 'p.Y651C"', '"p.H1791D', '"p.C1788W', '"p.N1551K', '"p.C1370W', '"p.H1791D']	[]	['deleterious(0)', 'deleterious(0.001)', 'deleterious(0)', 'deleterious(0.3)', 'deleterious(0)', 'deleterious(0.001)']	[]	['probably_damaging(1)', 'probably_damaging(0.991)', 'probably_damaging(0.999)', 'probably_damaging(0.997)', 'probably_damaging(1)', 'probably_damaging(0.991)']	0.000498602	0.0224	1
Q16778	Q92793	ECLAIR	H2BC21	CREBBP	8349	1387	0	0	10	6	[]	['"p.Y613C', 'p.Y651C"', '"p.H1791D', '"p.C1788W', '"p.N1551K', '"p.C1370W', '"p.H1791D']	[]	['deleterious(0)', 'deleterious(0.001)', 'deleterious(0)', 'deleterious(0.3)', 'deleterious(0)', 'deleterious(0.001)']	[]	['probably_damaging(1)', 'probably_damaging(0.991)', 'probably_damaging(0.999)', 'probably_damaging(0.997)', 'probably_damaging(1)', 'probably_damaging(0.991)']	0.000498602	0.0224	1
Q53ET0	Q92793	ECLAIR	CRTC2	CREBBP	200186	1387	0	0	10	6	[]	['"p.Y613C', 'p.Y651C"', '"p.H1791D', '"p.C1788W', '"p.N1551K', '"p.C1370W', '"p.H1791D']	[]	['deleterious(0)', 'deleterious(0.001)', 'deleterious(0)', 'deleterious(0.3)', 'deleterious(0)', 'deleterious(0.001)']	[]	['probably_damaging(1)', 'probably_damaging(0.991)', 'probably_damaging(0.999)', 'probably_damaging(0.997)', 'probably_damaging(1)', 'probably_damaging(0.991)']	0.000498602	0.0224	1
Q71SY5	Q92793	ECLAIR	MED25	CREBBP	81857	1387	0	0	10	6	[]	['"p.Y613C', 'p.Y651C"', '"p.H1791D', '"p.C1788W', '"p.N1551K', '"p.C1370W', '"p.H1791D']	[]	['deleterious(0)', 'deleterious(0.001)', 'deleterious(0)', 'deleterious(0.3)', 'deleterious(0)', 'deleterious(0.001)']	[]	['probably_damaging(1)', 'probably_damaging(0.991)', 'probably_damaging(0.999)', 'probably_damaging(0.997)', 'probably_damaging(1)', 'probably_damaging(0.991)']	0.000498602	0.0224	1
Q7LBC6	Q92793	ECLAIR	KDM3B	CREBBP	51780	1387	0	0	10	6	[]	['"p.Y613C', 'p.Y651C"', '"p.H1791D', '"p.C1788W', '"p.N1551K', '"p.C1370W', '"p.H1791D']	[]	['deleterious(0)', 'deleterious(0.001)', 'deleterious(0)', 'deleterious(0.3)', 'deleterious(0)', 'deleterious(0.001)']	[]	['probably_damaging(1)', 'probably_damaging(0.991)', 'probably_damaging(0.999)', 'probably_damaging(0.997)', 'probably_damaging(1)', 'probably_damaging(0.991)']	0.000498602	0.0224	1
Q92793	Q92993	ECLAIR	CREBBP	KAT5	1387	10524	10	6	0	0	['"p.Y613C', 'p.Y651C"', '"p.H1791D', '"p.C1788W', '"p.N1551K', '"p.C1370W', '"p.H1791D']	[]	['deleterious(0)', 'deleterious(0.001)', 'deleterious(0)', 'deleterious(0.3)', 'deleterious(0)', 'deleterious(0.001)']	[]	['probably_damaging(1)', 'probably_damaging(0.991)', 'probably_damaging(0.999)', 'probably_damaging(0.997)', 'probably_damaging(1)', 'probably_damaging(0.991)']	[]	0.000498602	0.0224	1
Q92793	Q96JB5	ECLAIR	CREBBP	CDK5RAP3	1387	80279	10	6	0	0	['"p.Y613C', 'p.Y651C"', '"p.H1791D', '"p.C1788W', '"p.N1551K', '"p.C1370W', '"p.H1791D']	[]	['deleterious(0)', 'deleterious(0.001)', 'deleterious(0)', 'deleterious(0.3)', 'deleterious(0)', 'deleterious(0.001)']	[]	['probably_damaging(1)', 'probably_damaging(0.991)', 'probably_damaging(0.999)', 'probably_damaging(0.997)', 'probably_damaging(1)', 'probably_damaging(0.991)']	[]	0.000498602	0.0224	1
Q92793	Q99961	ECLAIR	CREBBP	SH3GL1	1387	6455	10	6	0	0	['"p.Y613C', 'p.Y651C"', '"p.H1791D', '"p.C1788W', '"p.N1551K', '"p.C1370W', '"p.H1791D']	[]	['deleterious(0)', 'deleterious(0.001)', 'deleterious(0)', 'deleterious(0.3)', 'deleterious(0)', 'deleterious(0.001)']	[]	['probably_damaging(1)', 'probably_damaging(0.991)', 'probably_damaging(0.999)', 'probably_damaging(0.997)', 'probably_damaging(1)', 'probably_damaging(0.991)']	[]	0.000498602	0.0224	1
Q92793	Q9HC77	ECLAIR	CREBBP	CENPJ	1387	55835	10	6	1	0	['"p.Y613C', 'p.Y651C"', '"p.H1791D', '"p.C1788W', '"p.N1551K', '"p.C1370W', '"p.H1791D']	[]	['deleterious(0)', 'deleterious(0.001)', 'deleterious(0)', 'deleterious(0.3)', 'deleterious(0)', 'deleterious(0.001)']	[]	['probably_damaging(1)', 'probably_damaging(0.991)', 'probably_damaging(0.999)', 'probably_damaging(0.997)', 'probably_damaging(1)', 'probably_damaging(0.991)']	[]	0.000498602	0.0224	1
Q92793	Q9NP62	ECLAIR	CREBBP	GCM1	1387	8521	10	6	0	0	['"p.Y613C', 'p.Y651C"', '"p.H1791D', '"p.C1788W', '"p.N1551K', '"p.C1370W', '"p.H1791D']	[]	['deleterious(0)', 'deleterious(0.001)', 'deleterious(0)', 'deleterious(0.3)', 'deleterious(0)', 'deleterious(0.001)']	[]	['probably_damaging(1)', 'probably_damaging(0.991)', 'probably_damaging(0.999)', 'probably_damaging(0.997)', 'probably_damaging(1)', 'probably_damaging(0.991)']	[]	0.000498602	0.0224	1
Q92793	Q9UBE8	ECLAIR	CREBBP	NLK	1387	51701	10	6	0	0	['"p.Y613C', 'p.Y651C"', '"p.H1791D', '"p.C1788W', '"p.N1551K', '"p.C1370W', '"p.H1791D']	[]	['deleterious(0)', 'deleterious(0.001)', 'deleterious(0)', 'deleterious(0.3)', 'deleterious(0)', 'deleterious(0.001)']	[]	['probably_damaging(1)', 'probably_damaging(0.991)', 'probably_damaging(0.999)', 'probably_damaging(0.997)', 'probably_damaging(1)', 'probably_damaging(0.991)']	[]	0.000498602	0.0224	1
Q92793	Q9Y2Y9	ECLAIR	CREBBP	KLF13	1387	51621	10	6	0	0	['"p.Y613C', 'p.Y651C"', '"p.H1791D', '"p.C1788W', '"p.N1551K', '"p.C1370W', '"p.H1791D']	[]	['deleterious(0)', 'deleterious(0.001)', 'deleterious(0)', 'deleterious(0.3)', 'deleterious(0)', 'deleterious(0.001)']	[]	['probably_damaging(1)', 'probably_damaging(0.991)', 'probably_damaging(0.999)', 'probably_damaging(0.997)', 'probably_damaging(1)', 'probably_damaging(0.991)']	[]	0.000498602	0.0224	1
Q92793	Q9Y6B2	ECLAIR	CREBBP	EID1	1387	23741	10	6	0	0	['"p.Y613C', 'p.Y651C"', '"p.H1791D', '"p.C1788W', '"p.N1551K', '"p.C1370W', '"p.H1791D']	[]	['deleterious(0)', 'deleterious(0.001)', 'deleterious(0)', 'deleterious(0.3)', 'deleterious(0)', 'deleterious(0.001)']	[]	['probably_damaging(1)', 'probably_damaging(0.991)', 'probably_damaging(0.999)', 'probably_damaging(0.997)', 'probably_damaging(1)', 'probably_damaging(0.991)']	[]	0.000498602	0.0224	1
Q92793	Q9Y6K9	ECLAIR	CREBBP	IKBKG	1387	8517	10	6	0	0	['"p.Y613C', 'p.Y651C"', '"p.H1791D', '"p.C1788W', '"p.N1551K', '"p.C1370W', '"p.H1791D']	[]	['deleterious(0)', 'deleterious(0.001)', 'deleterious(0)', 'deleterious(0.3)', 'deleterious(0)', 'deleterious(0.001)']	[]	['probably_damaging(1)', 'probably_damaging(0.991)', 'probably_damaging(0.999)', 'probably_damaging(0.997)', 'probably_damaging(1)', 'probably_damaging(0.991)']	[]	0.000498602	0.0224	1
Q92793	V9HWA7	ECLAIR	CREBBP	HEL23	1387	8092	10	6	0	0	['"p.Y613C', 'p.Y651C"', '"p.H1791D', '"p.C1788W', '"p.N1551K', '"p.C1370W', '"p.H1791D']	[]	['deleterious(0)', 'deleterious(0.001)', 'deleterious(0)', 'deleterious(0.3)', 'deleterious(0)', 'deleterious(0.001)']	[]	['probably_damaging(1)', 'probably_damaging(0.991)', 'probably_damaging(0.999)', 'probably_damaging(0.997)', 'probably_damaging(1)', 'probably_damaging(0.991)']	[]	0.000498602	0.0224	1
Q92793	V9HWJ8	ECLAIR	CREBBP	HEL-S-283	1387	10197	10	6	0	0	['"p.Y613C', 'p.Y651C"', '"p.H1791D', '"p.C1788W', '"p.N1551K', '"p.C1370W', '"p.H1791D']	[]	['deleterious(0)', 'deleterious(0.001)', 'deleterious(0)', 'deleterious(0.3)', 'deleterious(0)', 'deleterious(0.001)']	[]	['probably_damaging(1)', 'probably_damaging(0.991)', 'probably_damaging(0.999)', 'probably_damaging(0.997)', 'probably_damaging(1)', 'probably_damaging(0.991)']	[]	0.000498602	0.0224	1
Q92558	Q96F07	I3D	WASF1	CYFIP2	8936	26999	0	0	3	3	[]	['p.I664M"', 'p.E665K"', 'p.R795C"']	[]	['deleterious(0)', 'deleterious(0.002)', 'deleterious(0)']	[]	['probably_damaging(1)', 'probably_damaging(0.999)', 'probably_damaging(1)']	0.000508403	0.0141	1
P10809	Q9UHX1	ECLAIR	HSPD1	PUF60	3329	22827	0	0	3	3	[]	['p.G448E', 'p.E138K', 'p.D142N']	[]	['deleterious(0)', 'deleterious(0.03)', 'tolerated(0.917)']	[]	['probably_damaging(0.999)', 'probably_damaging(0.999)', 'benign(0.028)']	0.000521678	0.0144	1
Q12874	Q9UHX1	ECLAIR	SF3A3	PUF60	10946	22827	1	0	3	3	[]	['p.G448E', 'p.E138K', 'p.D142N']	[]	['deleterious(0)', 'deleterious(0.03)', 'tolerated(0.917)']	[]	['probably_damaging(0.999)', 'probably_damaging(0.999)', 'benign(0.028)']	0.000521678	0.0144	1
P18858	P68400	ECLAIR	LIG1	CSNK2A1	3978	1457	1	1	8	4	['p.R363Q"']	['"p.K62R', '"p.K62R', 'p.R191Q', 'p.R191Q"', '"p.K62R']	['deleterious(0.002)']	['deleterious(0.001)', 'deleterious(0.001)', 'deleterious(0)', 'deleterious(0.001)']	['probably_damaging(0.998)']	['possibly_damaging(0.887)', 'possibly_damaging(0.887)', 'probably_damaging(0.999)', 'possibly_damaging(0.887)']	0.000532129	0.0145	1
P11532	P11532	PDB	DMD	DMD	1756	1756	1	1	1	1	['"p.D97N']	['"p.D97N']	['deleterious(0.089)']	['deleterious(0.089)']	['benign(0.119)']	['benign(0.119)']	0.000544656	0.0148	1
P40424	Q96PU5	ECLAIR	PBX1	NEDD4L	5087	23327	2	2	1	1	['"p.R235Q', 'p.R235Q', 'p.R235Q"', 'p.Y260H', 'p.Y260H"', '"p.Y260H']	['p.Y659C', 'p.Y679C']	['deleterious(0.001)', 'deleterious(0)']	['deleterious(0)']	['probably_damaging(0.999)', 'probably_damaging(0.993)']	['probably_damaging(1)']	0.000550973	0.0149	1
O00571	Q9UG63	ECLAIR	DDX3X	ABCF2	1654	114483834	15	6	1	1	['"p.R360C', '"p.C452Y', 'p.R534H', 'p.R534H"', 'p.V535I', 'p.V535I"', '"p.R360C', 'p.R534H', 'p.R534H"']	['"p.H571Q', 'p.H571Q"']	['deleterious(0)', 'deleterious(0.002)', 'deleterious(0)', 'deleterious(0.035)', 'deleterious(0)', 'deleterious(0)']	['deleterious(0)']	['probably_damaging(1)', 'probably_damaging(0.999)', 'probably_damaging(1)', 'possibly_damaging(0.532)', 'probably_damaging(1)', 'probably_damaging(1)']	['probably_damaging(0.999)']	0.000577592	0.0155	1
Q15326	Q15750	ECLAIR	ZMYND11	TAB1	10771	10454	6	3	0	0	['p.R583W"', 'p.R583W"', 'p.R583W"']	[]	['deleterious(0)', 'deleterious(0)', 'deleterious(0)']	[]	['probably_damaging(1)', 'probably_damaging(1)', 'probably_damaging(1)']	[]	0.000585249	0.0156	1
O75436	P41227	ECLAIR	VPS26A	NAA10	9559	8260	0	0	5	4	[]	['p.R83C"', '"p.R83C', '"p.H114P', 'p.R83C"', '"p.R83C', '"p.R82Q', 'p.R82Q"']	[]	['deleterious(0.01)', 'deleterious(0.004)', 'deleterious(0.01)', 'deleterious(0)']	[]	['possibly_damaging(0.598)', 'possibly_damaging(0.936)', 'possibly_damaging(0.598)', 'probably_damaging(1)']	0.000585908	0.0156	1
P68400	Q96J02	ECLAIR	CSNK2A1	ITCH	1457	83737	8	4	1	1	['"p.K62R', '"p.K62R', '"p.I38M', '"p.K62R']	['p.R341Q', 'p.R341Q"']	['deleterious(0.001)', 'deleterious(0.001)', 'deleterious(0.001)', 'deleterious(0.001)']	['deleterious(0.034)']	['possibly_damaging(0.887)', 'possibly_damaging(0.887)', 'probably_damaging(0.993)', 'possibly_damaging(0.887)']	['probably_damaging(0.997)']	0.000595385	0.0158	1
O15357	P56945	ECLAIR	INPPL1	BCAR1	3636	9564	2	1	2	2	['p.R581Q']	['p.G794R', 'p.G814R', 'p.V455A']	['deleterious(0.003)']	['deleterious(0)', 'deleterious(0.001)']	['probably_damaging(1)']	['probably_damaging(1)', 'probably_damaging(0.969)']	0.000662284	0.0175	1
P63279	Q9UHX1	ECLAIR	UBE2I	PUF60	7329	22827	0	0	3	3	[]	['p.G448E', 'p.E138K', 'p.D142N']	[]	['deleterious(0)', 'deleterious(0.03)', 'tolerated(0.917)']	[]	['probably_damaging(0.999)', 'probably_damaging(0.999)', 'benign(0.028)']	0.000673524	0.0177	1
O43829	P41227	ECLAIR	ZBTB14	NAA10	7541	8260	0	0	5	4	[]	['p.R83C"', '"p.R83C', '"p.H114P', 'p.R83C"', '"p.R83C', '"p.R82Q', 'p.R82Q"']	[]	['deleterious(0.01)', 'deleterious(0.004)', 'deleterious(0.01)', 'deleterious(0)']	[]	['possibly_damaging(0.598)', 'possibly_damaging(0.936)', 'possibly_damaging(0.598)', 'probably_damaging(1)']	0.000682879	0.0178	1
O43889	P41227	ECLAIR	CREB3	NAA10	10488	8260	0	0	5	4	[]	['p.R83C"', '"p.R83C', '"p.H114P', 'p.R83C"', '"p.R83C', '"p.R82Q', 'p.R82Q"']	[]	['deleterious(0.01)', 'deleterious(0.004)', 'deleterious(0.01)', 'deleterious(0)']	[]	['possibly_damaging(0.598)', 'possibly_damaging(0.936)', 'possibly_damaging(0.598)', 'probably_damaging(1)']	0.000682879	0.0178	1
P41227	P60369	ECLAIR	NAA10	KRTAP10-3	8260	386682	5	4	0	0	['p.R83C"', '"p.R83C', '"p.H114P', 'p.R83C"', '"p.R83C', '"p.R82Q', 'p.R82Q"']	[]	['deleterious(0.01)', 'deleterious(0.004)', 'deleterious(0.01)', 'deleterious(0)']	[]	['possibly_damaging(0.598)', 'possibly_damaging(0.936)', 'possibly_damaging(0.598)', 'probably_damaging(1)']	[]	0.000682879	0.0178	1
P41227	P60409	ECLAIR	NAA10	KRTAP10-7	8260	386675	5	4	0	0	['p.R83C"', '"p.R83C', '"p.H114P', 'p.R83C"', '"p.R83C', '"p.R82Q', 'p.R82Q"']	[]	['deleterious(0.01)', 'deleterious(0.004)', 'deleterious(0.01)', 'deleterious(0)']	[]	['possibly_damaging(0.598)', 'possibly_damaging(0.936)', 'possibly_damaging(0.598)', 'probably_damaging(1)']	[]	0.000682879	0.0178	1
P41227	Q16665	ECLAIR	NAA10	HIF1A	8260	3091	5	4	0	0	['p.R83C"', '"p.R83C', '"p.H114P', 'p.R83C"', '"p.R83C', '"p.R82Q', 'p.R82Q"']	[]	['deleterious(0.01)', 'deleterious(0.004)', 'deleterious(0.01)', 'deleterious(0)']	[]	['possibly_damaging(0.598)', 'possibly_damaging(0.936)', 'possibly_damaging(0.598)', 'probably_damaging(1)']	[]	0.000682879	0.0178	1
P41227	Q5VU43	ECLAIR	NAA10	PDE4DIP	8260	9659	5	4	3	0	['p.R83C"', '"p.R83C', '"p.H114P', 'p.R83C"', '"p.R83C', '"p.R82Q', 'p.R82Q"']	[]	['deleterious(0.01)', 'deleterious(0.004)', 'deleterious(0.01)', 'deleterious(0)']	[]	['possibly_damaging(0.598)', 'possibly_damaging(0.936)', 'possibly_damaging(0.598)', 'probably_damaging(1)']	[]	0.000682879	0.0178	1
P41227	Q6W2J9	ECLAIR	NAA10	BCOR	8260	54880	5	4	1	0	['p.R83C"', '"p.R83C', '"p.H114P', 'p.R83C"', '"p.R83C', '"p.R82Q', 'p.R82Q"']	[]	['deleterious(0.01)', 'deleterious(0.004)', 'deleterious(0.01)', 'deleterious(0)']	[]	['possibly_damaging(0.598)', 'possibly_damaging(0.936)', 'possibly_damaging(0.598)', 'probably_damaging(1)']	[]	0.000682879	0.0178	1
P41227	Q92845	ECLAIR	NAA10	KIFAP3	8260	22920	5	4	0	0	['p.R83C"', '"p.R83C', '"p.H114P', 'p.R83C"', '"p.R83C', '"p.R82Q', 'p.R82Q"']	[]	['deleterious(0.01)', 'deleterious(0.004)', 'deleterious(0.01)', 'deleterious(0)']	[]	['possibly_damaging(0.598)', 'possibly_damaging(0.936)', 'possibly_damaging(0.598)', 'probably_damaging(1)']	[]	0.000682879	0.0178	1
P41227	Q96KQ7	ECLAIR	NAA10	EHMT2	8260	10919	5	4	0	0	['p.R83C"', '"p.R83C', '"p.H114P', 'p.R83C"', '"p.R83C', '"p.R82Q', 'p.R82Q"']	[]	['deleterious(0.01)', 'deleterious(0.004)', 'deleterious(0.01)', 'deleterious(0)']	[]	['possibly_damaging(0.598)', 'possibly_damaging(0.936)', 'possibly_damaging(0.598)', 'probably_damaging(1)']	[]	0.000682879	0.0178	1
P41227	Q9C0F1	ECLAIR	NAA10	CEP44	8260	80817	5	4	0	0	['p.R83C"', '"p.R83C', '"p.H114P', 'p.R83C"', '"p.R83C', '"p.R82Q', 'p.R82Q"']	[]	['deleterious(0.01)', 'deleterious(0.004)', 'deleterious(0.01)', 'deleterious(0)']	[]	['possibly_damaging(0.598)', 'possibly_damaging(0.936)', 'possibly_damaging(0.598)', 'probably_damaging(1)']	[]	0.000682879	0.0178	1
P68400	Q96ST3	ECLAIR	CSNK2A1	SIN3A	1457	25942	8	4	1	1	['"p.K62R', '"p.K62R', '"p.I38M', '"p.K62R']	['p.A126V', 'p.A126V"', '"p.A126V']	['deleterious(0.001)', 'deleterious(0.001)', 'deleterious(0.001)', 'deleterious(0.001)']	['deleterious(0)']	['possibly_damaging(0.887)', 'possibly_damaging(0.887)', 'probably_damaging(0.993)', 'possibly_damaging(0.887)']	['probably_damaging(1)']	0.000689814	0.0172	1
P62306	Q9UHX1	ECLAIR	SNRPF	PUF60	6636	22827	0	0	3	3	[]	['p.G448E', 'p.E138K', 'p.D142N']	[]	['deleterious(0)', 'deleterious(0.03)', 'tolerated(0.917)']	[]	['probably_damaging(0.999)', 'probably_damaging(0.999)', 'benign(0.028)']	0.000759408	0.0189	1
O14974	Q13976	ECLAIR	PPP1R12A	PRKG1	4659	5592	2	2	3	1	['p.R249Q"', 'p.R249Q', '"p.R162Q', 'p.H131Y', 'p.H131Y"']	['"p.G370S']	['deleterious(0.101)', 'deleterious(0.062)']	['deleterious(0)']	['probably_damaging(0.993)', 'probably_damaging(0.986)']	['probably_damaging(0.972)']	0.000781302	0.0193	1
P22607	P22607	PDB	FGFR3	FGFR3	2261	2261	1	1	1	1	['"p.G380R']	['"p.G380R']	['deleterious(0.085)']	['deleterious(0.085)']	['probably_damaging(0.959)']	['probably_damaging(0.959)']	0.00088665	0.0218	1
O75688	P41227	ECLAIR	PPM1B	NAA10	5495	8260	0	0	5	4	[]	['p.R83C"', '"p.R83C', '"p.H114P', 'p.R83C"', '"p.R83C', '"p.R82Q', 'p.R82Q"']	[]	['deleterious(0.01)', 'deleterious(0.004)', 'deleterious(0.01)', 'deleterious(0)']	[]	['possibly_damaging(0.598)', 'possibly_damaging(0.936)', 'possibly_damaging(0.598)', 'probably_damaging(1)']	0.000911646	0.0223	1
P35813	P41227	ECLAIR	PPM1A	NAA10	5494	8260	0	0	5	4	[]	['p.R83C"', '"p.R83C', '"p.H114P', 'p.R83C"', '"p.R83C', '"p.R82Q', 'p.R82Q"']	[]	['deleterious(0.01)', 'deleterious(0.004)', 'deleterious(0.01)', 'deleterious(0)']	[]	['possibly_damaging(0.598)', 'possibly_damaging(0.936)', 'possibly_damaging(0.598)', 'probably_damaging(1)']	0.000911646	0.0223	1
P41227	Q8NFW8	ECLAIR	NAA10	CMAS	8260	55907	5	4	0	0	['p.R83C"', '"p.R83C', '"p.H114P', 'p.R83C"', '"p.R83C', '"p.R82Q', 'p.R82Q"']	[]	['deleterious(0.01)', 'deleterious(0.004)', 'deleterious(0.01)', 'deleterious(0)']	[]	['possibly_damaging(0.598)', 'possibly_damaging(0.936)', 'possibly_damaging(0.598)', 'probably_damaging(1)']	[]	0.000911646	0.0223	1
O60925	Q15910	ECLAIR	PFDN1	EZH2	5201	2146	0	0	2	2	[]	['p.R679H', 'p.R679C']	[]	['deleterious(0.009)', 'deleterious(0)']	[]	['probably_damaging(0.999)', 'probably_damaging(1)']	0.000950557	0.023	1
P62888	Q05639	ECLAIR	RPL30	EEF1A2	6156	1917	1	1	7	4	['p.D103N']	['p.D252H', 'p.R266W', 'p.E124K', 'p.I71L']	['deleterious(0.003)']	['deleterious(0)', 'deleterious(0)', 'deleterious(0.016)', 'deleterious(0)']	['probably_damaging(0.98)']	['probably_damaging(1)', 'probably_damaging(1)', 'probably_damaging(0.962)', 'benign(0.034)']	0.00099435	0.0239	1
P15036	Q15326	ECLAIR	ETS2	ZMYND11	2114	10771	0	0	6	3	[]	['p.R583W"', 'p.R583W"', 'p.R583W"']	[]	['deleterious(0)', 'deleterious(0)', 'deleterious(0)']	[]	['probably_damaging(1)', 'probably_damaging(1)', 'probably_damaging(1)']	0.0010224	0.0245	1
Q9NTZ6	Q9NTZ6	PDB	RBM12	RBM12	10137	10137	1	1	1	1	['"p.V867M', 'p.V867M', 'p.V867M"']	['"p.V867M', 'p.V867M', 'p.V867M"']	['deleterious(0.013)']	['deleterious(0.013)']	['probably_damaging(0.994)']	['probably_damaging(0.994)']	0.00103612	0.0247	1
P41227	P54577	ECLAIR	NAA10	YARS1	8260	8565	5	4	0	0	['p.R83C"', '"p.R83C', '"p.H114P', 'p.R83C"', '"p.R83C', '"p.R82Q', 'p.R82Q"']	[]	['deleterious(0.01)', 'deleterious(0.004)', 'deleterious(0.01)', 'deleterious(0)']	[]	['possibly_damaging(0.598)', 'possibly_damaging(0.936)', 'possibly_damaging(0.598)', 'probably_damaging(1)']	[]	0.00104508	0.0248	1
P41227	Q6N069	ECLAIR	NAA10	NAA16	8260	79612	5	4	0	0	['p.R83C"', '"p.R83C', '"p.H114P', 'p.R83C"', '"p.R83C', '"p.R82Q', 'p.R82Q"']	[]	['deleterious(0.01)', 'deleterious(0.004)', 'deleterious(0.01)', 'deleterious(0)']	[]	['possibly_damaging(0.598)', 'possibly_damaging(0.936)', 'possibly_damaging(0.598)', 'probably_damaging(1)']	[]	0.00104508	0.0248	1
P41227	Q9BXJ9	ECLAIR	NAA10	NAA15	8260	80155	5	4	0	0	['p.R83C"', '"p.R83C', '"p.H114P', 'p.R83C"', '"p.R83C', '"p.R82Q', 'p.R82Q"']	[]	['deleterious(0.01)', 'deleterious(0.004)', 'deleterious(0.01)', 'deleterious(0)']	[]	['possibly_damaging(0.598)', 'possibly_damaging(0.936)', 'possibly_damaging(0.598)', 'probably_damaging(1)']	[]	0.00104508	0.0248	1
O00571	P26368	ECLAIR	DDX3X	U2AF2	1654	11338	15	3	4	1	['p.R534H', 'p.R534H"', 'p.V535I', 'p.V535I"', 'p.R534H', 'p.R534H"']	['p.T252I"', '"p.T252I']	['deleterious(0)', 'deleterious(0.035)', 'deleterious(0)']	['deleterious(0.003)']	['probably_damaging(1)', 'possibly_damaging(0.532)', 'probably_damaging(1)']	['probably_damaging(0.99)']	0.0010781	0.0253	1
O15084	O15084	I3D	ANKRD28	ANKRD28	23243	23243	1	1	1	1	['p.G250E', 'p.G247E"']	['p.G250E', 'p.G247E"']	['deleterious(0.001)']	['deleterious(0.001)']	['probably_damaging(1)']	['probably_damaging(1)']	0.00116882	0.0273	1
Q5JTV8	Q5JTV8	PDB	TOR1AIP1	TOR1AIP1	26092	26092	1	1	1	1	['"p.R438H']	['"p.R438H']	['deleterious(0.253)']	['deleterious(0.253)']	['benign(0.011)']	['benign(0.011)']	0.00117686	0.0274	1
P84022	Q15326	ECLAIR	SMAD3	ZMYND11	4088	10771	1	1	6	3	['p.G249C']	['p.R583W"', 'p.R583W"', 'p.R583W"']	['deleterious(0)']	['deleterious(0)', 'deleterious(0)', 'deleterious(0)']	['probably_damaging(1)']	['probably_damaging(1)', 'probably_damaging(1)', 'probably_damaging(1)']	0.00129128	0.0299	1
O00560	Q9UHX1	ECLAIR	SDCBP	PUF60	6386	22827	0	0	3	3	[]	['p.G448E', 'p.E164K', 'p.E163K', 'p.E138K', 'p.D159N"']	[]	['deleterious(0)', 'deleterious(0.03)', 'tolerated(0.917)']	[]	['probably_damaging(0.999)', 'probably_damaging(0.999)', 'benign(0.028)']	0.00129943	0.03	1
O60844	Q9UHX1	ECLAIR	ZG16	PUF60	653808	22827	0	0	3	3	[]	['p.G448E', 'p.E164K', 'p.E163K', 'p.E138K', 'p.D159N"']	[]	['deleterious(0)', 'deleterious(0.03)', 'tolerated(0.917)']	[]	['probably_damaging(0.999)', 'probably_damaging(0.999)', 'benign(0.028)']	0.00129943	0.03	1
O75400	Q9UHX1	ECLAIR	PRPF40A	PUF60	55660	22827	1	0	3	3	[]	['p.G448E', 'p.E164K', 'p.E163K', 'p.E138K', 'p.D159N"']	[]	['deleterious(0)', 'deleterious(0.03)', 'tolerated(0.917)']	[]	['probably_damaging(0.999)', 'probably_damaging(0.999)', 'benign(0.028)']	0.00129943	0.03	1
O75533	Q9UHX1	ECLAIR	SF3B1	PUF60	23451	22827	2	0	3	3	[]	['p.G448E', 'p.E164K', 'p.E163K', 'p.E138K', 'p.D159N"']	[]	['deleterious(0)', 'deleterious(0.03)', 'tolerated(0.917)']	[]	['probably_damaging(0.999)', 'probably_damaging(0.999)', 'benign(0.028)']	0.00129943	0.03	1
P02751	Q9UHX1	ECLAIR	FN1	PUF60	2335	22827	1	0	3	3	[]	['p.G448E', 'p.E164K', 'p.E163K', 'p.E138K', 'p.D159N"']	[]	['deleterious(0)', 'deleterious(0.03)', 'tolerated(0.917)']	[]	['probably_damaging(0.999)', 'probably_damaging(0.999)', 'benign(0.028)']	0.00129943	0.03	1
P08670	Q9UHX1	ECLAIR	VIM	PUF60	7431	22827	0	0	3	3	[]	['p.G448E', 'p.E164K', 'p.E163K', 'p.E138K', 'p.D159N"']	[]	['deleterious(0)', 'deleterious(0.03)', 'tolerated(0.917)']	[]	['probably_damaging(0.999)', 'probably_damaging(0.999)', 'benign(0.028)']	0.00129943	0.03	1
P26368	Q9UHX1	ECLAIR	U2AF2	PUF60	11338	22827	4	0	3	3	[]	['p.G448E', 'p.E164K', 'p.E163K', 'p.E138K', 'p.D159N"']	[]	['deleterious(0)', 'deleterious(0.03)', 'tolerated(0.917)']	[]	['probably_damaging(0.999)', 'probably_damaging(0.999)', 'benign(0.028)']	0.00129943	0.03	1
P26639	Q9UHX1	ECLAIR	TARS1	PUF60	6897	22827	0	0	3	3	[]	['p.G448E', 'p.E164K', 'p.E163K', 'p.E138K', 'p.D159N"']	[]	['deleterious(0)', 'deleterious(0.03)', 'tolerated(0.917)']	[]	['probably_damaging(0.999)', 'probably_damaging(0.999)', 'benign(0.028)']	0.00129943	0.03	1
P33527	Q9UHX1	ECLAIR	ABCC1	PUF60	4363	22827	0	0	3	3	[]	['p.G448E', 'p.E164K', 'p.E163K', 'p.E138K', 'p.D159N"']	[]	['deleterious(0)', 'deleterious(0.03)', 'tolerated(0.917)']	[]	['probably_damaging(0.999)', 'probably_damaging(0.999)', 'benign(0.028)']	0.00129943	0.03	1
P51003	Q9UHX1	ECLAIR	PAPOLA	PUF60	10914	22827	0	0	3	3	[]	['p.G448E', 'p.E164K', 'p.E163K', 'p.E138K', 'p.D159N"']	[]	['deleterious(0)', 'deleterious(0.03)', 'tolerated(0.917)']	[]	['probably_damaging(0.999)', 'probably_damaging(0.999)', 'benign(0.028)']	0.00129943	0.03	1
P52306	Q9UHX1	ECLAIR	RAP1GDS1	PUF60	5910	22827	0	0	3	3	[]	['p.G448E', 'p.E164K', 'p.E163K', 'p.E138K', 'p.D159N"']	[]	['deleterious(0)', 'deleterious(0.03)', 'tolerated(0.917)']	[]	['probably_damaging(0.999)', 'probably_damaging(0.999)', 'benign(0.028)']	0.00129943	0.03	1
Q05519	Q9UHX1	ECLAIR	SRSF11	PUF60	9295	22827	0	0	3	3	[]	['p.G448E', 'p.E164K', 'p.E163K', 'p.E138K', 'p.D159N"']	[]	['deleterious(0)', 'deleterious(0.03)', 'tolerated(0.917)']	[]	['probably_damaging(0.999)', 'probably_damaging(0.999)', 'benign(0.028)']	0.00129943	0.03	1
Q12873	Q9UHX1	ECLAIR	CHD3	PUF60	1107	22827	7	0	3	3	[]	['p.G448E', 'p.E164K', 'p.E163K', 'p.E138K', 'p.D159N"']	[]	['deleterious(0)', 'deleterious(0.03)', 'tolerated(0.917)']	[]	['probably_damaging(0.999)', 'probably_damaging(0.999)', 'benign(0.028)']	0.00129943	0.03	1
Q2TAL8	Q9UHX1	ECLAIR	QRICH1	PUF60	54870	22827	0	0	3	3	[]	['p.G448E', 'p.E164K', 'p.E163K', 'p.E138K', 'p.D159N"']	[]	['deleterious(0)', 'deleterious(0.03)', 'tolerated(0.917)']	[]	['probably_damaging(0.999)', 'probably_damaging(0.999)', 'benign(0.028)']	0.00129943	0.03	1
Q7Z7F0	Q9UHX1	ECLAIR	KHDC4	PUF60	22889	22827	0	0	3	3	[]	['p.G448E', 'p.E164K', 'p.E163K', 'p.E138K', 'p.D159N"']	[]	['deleterious(0)', 'deleterious(0.03)', 'tolerated(0.917)']	[]	['probably_damaging(0.999)', 'probably_damaging(0.999)', 'benign(0.028)']	0.00129943	0.03	1
Q93033	Q9UHX1	ECLAIR	CD101	PUF60	9398	22827	1	0	3	3	[]	['p.G448E', 'p.E164K', 'p.E163K', 'p.E138K', 'p.D159N"']	[]	['deleterious(0)', 'deleterious(0.03)', 'tolerated(0.917)']	[]	['probably_damaging(0.999)', 'probably_damaging(0.999)', 'benign(0.028)']	0.00129943	0.03	1
Q96I34	Q9UHX1	ECLAIR	PPP1R16A	PUF60	84988	22827	1	0	3	3	[]	['p.G448E', 'p.E164K', 'p.E163K', 'p.E138K', 'p.D159N"']	[]	['deleterious(0)', 'deleterious(0.03)', 'tolerated(0.917)']	[]	['probably_damaging(0.999)', 'probably_damaging(0.999)', 'benign(0.028)']	0.00129943	0.03	1
Q96TA1	Q9UHX1	ECLAIR	NIBAN2	PUF60	64855	22827	0	0	3	3	[]	['p.G448E', 'p.E164K', 'p.E163K', 'p.E138K', 'p.D159N"']	[]	['deleterious(0)', 'deleterious(0.03)', 'tolerated(0.917)']	[]	['probably_damaging(0.999)', 'probably_damaging(0.999)', 'benign(0.028)']	0.00129943	0.03	1
Q9BQ52	Q9UHX1	ECLAIR	ELAC2	PUF60	60528	22827	1	0	3	3	[]	['p.G448E', 'p.E164K', 'p.E163K', 'p.E138K', 'p.D159N"']	[]	['deleterious(0)', 'deleterious(0.03)', 'tolerated(0.917)']	[]	['probably_damaging(0.999)', 'probably_damaging(0.999)', 'benign(0.028)']	0.00129943	0.03	1
Q9BW71	Q9UHX1	ECLAIR	HIRIP3	PUF60	8479	22827	0	0	3	3	[]	['p.G448E', 'p.E164K', 'p.E163K', 'p.E138K', 'p.D159N"']	[]	['deleterious(0)', 'deleterious(0.03)', 'tolerated(0.917)']	[]	['probably_damaging(0.999)', 'probably_damaging(0.999)', 'benign(0.028)']	0.00129943	0.03	1
Q9H0B3	Q9UHX1	ECLAIR	IQCN	PUF60	80726	22827	0	0	3	3	[]	['p.G448E', 'p.E164K', 'p.E163K', 'p.E138K', 'p.D159N"']	[]	['deleterious(0)', 'deleterious(0.03)', 'tolerated(0.917)']	[]	['probably_damaging(0.999)', 'probably_damaging(0.999)', 'benign(0.028)']	0.00129943	0.03	1
Q9HAU5	Q9UHX1	ECLAIR	UPF2	PUF60	26019	22827	0	0	3	3	[]	['p.G448E', 'p.E164K', 'p.E163K', 'p.E138K', 'p.D159N"']	[]	['deleterious(0)', 'deleterious(0.03)', 'tolerated(0.917)']	[]	['probably_damaging(0.999)', 'probably_damaging(0.999)', 'benign(0.028)']	0.00129943	0.03	1
Q9UHX1	Q9UKA9	ECLAIR	PUF60	PTBP2	22827	58155	3	3	0	0	['p.G448E', 'p.E164K', 'p.E163K', 'p.E138K', 'p.D159N"']	[]	['deleterious(0)', 'deleterious(0.03)', 'tolerated(0.917)']	[]	['probably_damaging(0.999)', 'probably_damaging(0.999)', 'benign(0.028)']	[]	0.00129943	0.03	1
Q9UHX1	Q9UQ35	ECLAIR	PUF60	SRRM2	22827	23524	3	3	0	0	['p.G448E', 'p.E164K', 'p.E163K', 'p.E138K', 'p.D159N"']	[]	['deleterious(0)', 'deleterious(0.03)', 'tolerated(0.917)']	[]	['probably_damaging(0.999)', 'probably_damaging(0.999)', 'benign(0.028)']	[]	0.00129943	0.03	1
Q9UHX1	Q9Y2W1	ECLAIR	PUF60	THRAP3	22827	9967	3	3	0	0	['p.G448E', 'p.E164K', 'p.E163K', 'p.E138K', 'p.D159N"']	[]	['deleterious(0)', 'deleterious(0.03)', 'tolerated(0.917)']	[]	['probably_damaging(0.999)', 'probably_damaging(0.999)', 'benign(0.028)']	[]	0.00129943	0.03	1
Q9UHX1	V9HWE1	ECLAIR	PUF60	HEL113	22827	7431	3	3	0	0	['p.G448E', 'p.E164K', 'p.E163K', 'p.E138K', 'p.D159N"']	[]	['deleterious(0)', 'deleterious(0.03)', 'tolerated(0.917)']	[]	['probably_damaging(0.999)', 'probably_damaging(0.999)', 'benign(0.028)']	[]	0.00129943	0.03	1
P36941	Q15326	ECLAIR	LTBR	ZMYND11	4055	10771	0	0	6	3	[]	['p.R583W"', 'p.R583W"', 'p.R583W"']	[]	['deleterious(0)', 'deleterious(0)', 'deleterious(0)']	[]	['probably_damaging(1)', 'probably_damaging(1)', 'probably_damaging(1)']	0.00130294	0.0271	1
P26045	P26045	PDB	PTPN3	PTPN3	5774	5774	1	1	1	1	['p.K708N']	['p.K708N']	['deleterious(0)']	['deleterious(0)']	['probably_damaging(1)']	['probably_damaging(1)']	0.00130643	0.0271	1
P46100	P46100	PDB	ATRX	ATRX	546	546	2	1	2	1	['"p.L191F']	['"p.L191F']	['deleterious(0.001)']	['deleterious(0.001)']	['probably_damaging(0.998)']	['probably_damaging(0.998)']	0.00133791	0.0277	1
O15379	Q16539	ECLAIR	HDAC3	MAPK14	8841	1432	2	2	0	0	['p.L266S', 'p.D93N']	[]	['deleterious(0)', 'deleterious(0.004)']	[]	['probably_damaging(1)', 'possibly_damaging(0.89)']	[]	0.0013975	0.0288	1
P07900	P68400	ECLAIR	HSP90AA1	CSNK2A1	3320	1457	1	1	8	4	['"p.A121T']	['"p.K62R', '"p.K62R', 'p.R191Q', 'p.R191Q"', '"p.K62R']	['deleterious(0)']	['deleterious(0.001)', 'deleterious(0.001)', 'deleterious(0)', 'deleterious(0.001)']	['probably_damaging(0.983)']	['possibly_damaging(0.887)', 'possibly_damaging(0.887)', 'probably_damaging(0.999)', 'possibly_damaging(0.887)']	0.0014074	0.0289	1
P27986	P63000	ECLAIR	PIK3R1	RAC1	5295	5879	1	1	3	2	['"p.I175M']	['"p.Y64D', 'p.Y64D"', 'p.P73L"', '"p.P73L']	['deleterious(0.052)']	['deleterious(0)', 'deleterious(0.019)']	['probably_damaging(0.988)']	['probably_damaging(1)', 'possibly_damaging(0.95)']	0.00153642	0.0314	1
P02794	P35711	ECLAIR	FTH1	SOX5	2495	6660	0	0	2	2	[]	['p.A561P', 'p.A583P"', 'p.R561W']	[]	['deleterious(0.004)', 'deleterious(0)']	[]	['probably_damaging(0.971)', 'probably_damaging(1)']	0.00154594	0.0315	1
Q03164	Q92793	PDB	KMT2A	CREBBP	4297	1387	4	1	10	1	['p.N2856K"']	['"p.Y613C']	['deleterious(0)']	['deleterious(0)']	['probably_damaging(0.999)']	['probably_damaging(1)']	0.00155895	0.0316	1
O00571	P62280	ECLAIR	DDX3X	RPS11	1654	6205	15	5	0	0	['"p.R360C', 'p.R534H', 'p.R534H"', 'p.V535I', 'p.V535I"', '"p.R360C', 'p.R534H', 'p.R534H"']	[]	['deleterious(0)', 'deleterious(0)', 'deleterious(0.035)', 'deleterious(0)', 'deleterious(0)']	[]	['probably_damaging(1)', 'probably_damaging(1)', 'possibly_damaging(0.532)', 'probably_damaging(1)', 'probably_damaging(1)']	[]	0.00161715	0.0327	1
P35711	Q9P0T4	ECLAIR	SOX5	ZNF581	6660	51545	2	2	0	0	['p.A561P', 'p.A583P"', 'p.A596P', 'p.R561W']	[]	['deleterious(0.004)', 'deleterious(0)']	[]	['probably_damaging(0.971)', 'probably_damaging(1)']	[]	0.00165072	0.0333	1
O15357	O15357	PDB	INPPL1	INPPL1	3636	3636	2	1	2	1	['p.R581Q']	['p.R581Q']	['deleterious(0.003)']	['deleterious(0.003)']	['probably_damaging(1)']	['probably_damaging(1)']	0.00167349	0.0336	1
P41227	Q8IVF2	ECLAIR	NAA10	AHNAK2	8260	113146	5	4	0	0	['p.R83C"', '"p.R83C', '"p.H114P', 'p.R83C"', '"p.R83C', '"p.R82Q', 'p.R82Q"']	[]	['deleterious(0.01)', 'deleterious(0.004)', 'deleterious(0.01)', 'deleterious(0)']	[]	['possibly_damaging(0.598)', 'possibly_damaging(0.936)', 'possibly_damaging(0.598)', 'probably_damaging(1)']	[]	0.00172584	0.0345	1
O43318	O95163	ECLAIR	MAP3K7	ELP1	6885	8518	2	1	1	1	['p.R238Q"', '"p.R238Q', 'p.R238Q']	['p.Q884R']	['deleterious(0.363)']	['deleterious(0.225)']	['benign(0.103)']	['benign(0)']	0.00176087	0.0351	1
P10242	Q15326	ECLAIR	MYB	ZMYND11	4602	10771	0	0	6	3	[]	['p.R583W"', 'p.R583W"', 'p.R583W"']	[]	['deleterious(0)', 'deleterious(0)', 'deleterious(0)']	[]	['probably_damaging(1)', 'probably_damaging(1)', 'probably_damaging(1)']	0.00180954	0.0359	1
P68400	Q08945	ECLAIR	CSNK2A1	SSRP1	1457	6749	8	3	0	0	['"p.K62R', '"p.K62R', '"p.K62R']	[]	['deleterious(0.001)', 'deleterious(0.001)', 'deleterious(0.001)']	[]	['possibly_damaging(0.887)', 'possibly_damaging(0.887)', 'possibly_damaging(0.887)']	[]	0.00181486	0.0359	1
P35711	Q00534	ECLAIR	SOX5	CDK6	6660	1021	2	2	0	0	['p.A561P', 'p.A596P', 'p.R561W']	[]	['deleterious(0.004)', 'deleterious(0)']	[]	['probably_damaging(0.971)', 'probably_damaging(1)']	[]	0.00187059	0.0369	1
Q99697	Q99697	I3D	PITX2	PITX2	5308	5308	1	1	1	1	['p.R115G', 'p.R115G"']	['p.R115G', 'p.R115G"']	['deleterious(0)']	['deleterious(0)']	['probably_damaging(1)']	['probably_damaging(1)']	0.00195046	0.0383	1
P63279	Q15326	ECLAIR	UBE2I	ZMYND11	7329	10771	0	0	6	3	[]	['p.R583W"', 'p.R583W"', 'p.R583W"']	[]	['deleterious(0)', 'deleterious(0)', 'deleterious(0)']	[]	['probably_damaging(1)', 'probably_damaging(1)', 'probably_damaging(1)']	0.00200269	0.0392	1
P84022	Q92793	ECLAIR	SMAD3	CREBBP	4088	1387	1	1	10	4	['p.G249C']	['"p.Y613C', 'p.Y651C"', '"p.H1791D', '"p.C1788W', '"p.H1791D']	['deleterious(0)']	['deleterious(0)', 'deleterious(0.001)', 'deleterious(0)', 'deleterious(0.001)']	['probably_damaging(1)']	['probably_damaging(1)', 'probably_damaging(0.991)', 'probably_damaging(0.999)', 'probably_damaging(0.991)']	0.0021054	0.0411	1
P15884	P22736	ECLAIR	TCF4	NR4A1	6925	3164	4	2	1	1	['p.R580W', 'p.R573W', 'p.R576W', 'p.R579W', 'p.R586W', 'p.R572Q', 'p.R582Q', 'p.R575Q', 'p.R576Q']	['p.L575M']	['deleterious(0)', 'deleterious(0.002)']	['deleterious(0.002)']	['probably_damaging(1)', 'probably_damaging(0.991)']	['probably_damaging(1)']	0.00211996	0.0412	1
O60216	Q8WVM7	ECLAIR	RAD21	STAG1	5885	10274	1	0	2	2	[]	['p.R216G', 'p.R216G']	[]	['deleterious(0)', 'deleterious(0)']	[]	['probably_damaging(1)', 'probably_damaging(1)']	0.00212566	0.0412	1
Q14683	Q8WVM7	ECLAIR	SMC1A	STAG1	8243	10274	2	0	2	2	[]	['p.R216G', 'p.R216G']	[]	['deleterious(0)', 'deleterious(0)']	[]	['probably_damaging(1)', 'probably_damaging(1)']	0.00212566	0.0412	1
Q8NDV3	Q8WVM7	ECLAIR	SMC1B	STAG1	27127	10274	1	0	2	2	[]	['p.R216G', 'p.R216G']	[]	['deleterious(0)', 'deleterious(0)']	[]	['probably_damaging(1)', 'probably_damaging(1)']	0.00212566	0.0412	1
Q8WVM7	Q9NTI5	ECLAIR	STAG1	PDS5B	10274	23047	2	2	2	0	['p.R216G', 'p.R216G']	[]	['deleterious(0)', 'deleterious(0)']	[]	['probably_damaging(1)', 'probably_damaging(1)']	[]	0.00212566	0.0412	1
Q8WVM7	Q9UQE7	ECLAIR	STAG1	SMC3	10274	9126	2	2	4	0	['p.R216G', 'p.R216G']	[]	['deleterious(0)', 'deleterious(0)']	[]	['probably_damaging(1)', 'probably_damaging(1)']	[]	0.00212566	0.0412	1
P84243	Q15326	ECLAIR	H3F3A	ZMYND11	3021	10771	1	0	6	3	[]	['p.R583W"', 'p.R583W"', 'p.R583W"']	[]	['deleterious(0)', 'deleterious(0)', 'deleterious(0)']	[]	['probably_damaging(1)', 'probably_damaging(1)', 'probably_damaging(1)']	0.00220855	0.0421	1
P33778	Q13627	ECLAIR	HIST1H2BB	DYRK1A	3018	1859	2	1	7	2	['p.S56L']	['"p.L169P', '"p.L169P']	['unknown(.)']	['deleterious(0)', 'deleterious(0)']	['benign(0.053)']	['probably_damaging(1)', 'probably_damaging(1)']	0.00222172	0.0422	1
P62805	Q13627	ECLAIR	H4C9	DYRK1A	8370	1859	0	0	7	2	[]	['"p.L169P', '"p.L169P']	[]	['deleterious(0)', 'deleterious(0)']	[]	['probably_damaging(1)', 'probably_damaging(1)']	0.00222918	0.0422	1
Q8TEK3	Q8TEK3	ECLAIR	DOT1L	DOT1L	84444	84444	1	1	1	1	['p.R292C']	['p.R292C']	['deleterious(0)']	['deleterious(0)']	['benign(0.237)']	['benign(0.237)']	0.00225579	0.0425	1
Q9UNL4	Q9UNL4	PDB	ING4	ING4	51147	51147	1	1	1	1	['p.Y195C', 'p.Y194C', 'p.Y198C']	['p.Y195C', 'p.Y194C', 'p.Y198C']	['deleterious(0)']	['deleterious(0)']	['probably_damaging(0.996)']	['probably_damaging(0.996)']	0.00232254	0.0436	1
P41235	Q92793	ECLAIR	HNF4A	CREBBP	3172	1387	1	1	10	4	['p.P354A', 'p.P357A', 'p.P354A"', 'p.P372A']	['"p.Y613C', 'p.Y651C"', '"p.H1791D', '"p.C1788W', '"p.H1791D']	['tolerated(0.57)']	['deleterious(0)', 'deleterious(0.001)', 'deleterious(0)', 'deleterious(0.001)']	['benign(0)']	['probably_damaging(1)', 'probably_damaging(0.991)', 'probably_damaging(0.999)', 'probably_damaging(0.991)']	0.00235969	0.0442	1
P60484	P60484	PDB	PTEN	PTEN	5728	5728	2	2	2	2	['p.L313F"', '"p.D268E']	['p.L313F"', '"p.D268E']	['deleterious(0.004)', 'tolerated(1)']	['deleterious(0.004)', 'tolerated(1)']	['probably_damaging(0.999)', 'benign(0.002)']	['probably_damaging(0.999)', 'benign(0.002)']	0.0023787	0.0444	1
P68431	Q14839	PDB	H3C8	CHD4	8968	1108	0	0	9	2	[]	['"p.C460Y', '"p.C460Y']	[]	['deleterious(0)', 'deleterious(0)']	[]	['probably_damaging(0.999)', 'probably_damaging(0.999)']	0.00242435	0.0451	1
P09917	P09917	PDB	ALOX5	ALOX5	240	240	1	1	1	1	['p.G528S']	['p.G528S']	['deleterious(0.072)']	['deleterious(0.072)']	['probably_damaging(1)']	['probably_damaging(1)']	0.00254471	0.0472	1
P54252	P67870	ECLAIR	ATXN3	CSNK2B	4287	1460	1	1	2	1	['p.G73D']	['"p.R86C', 'p.R86C"']	['deleterious(0.051)']	['deleterious(0)']	['possibly_damaging(0.726)']	['probably_damaging(0.997)']	0.0027053	0.05	1
P51608	Q14739	ECLAIR	MECP2	LBR	4204	3930	9	4	0	0	['"p.R145C', 'p.R133C', '"p.R145H', 'p.R133H', '"p.R145C', 'p.R133C', '"p.R145C', 'p.R133C']	[]	['deleterious(0)', 'deleterious(0)', 'deleterious(0)', 'deleterious(0)']	[]	['probably_damaging(1)', 'probably_damaging(1)', 'probably_damaging(1)', 'probably_damaging(1)']	[]	0.00279971	0.049	1
